# Supplementary material
Source: publisher figshare collection journal article supplement (https://acs.figshare.com/ndownloader/files/22285386)
Supplement: Supplementary file 1 [file 22285386]

## Sheet: Additional file 1
Additional file 1. Detailed information regarding the annotation of up- and down-regulated DEGs in the following comparison groups: CS5, 4, 3, and 2 vs CS1; CS5, 4, and 3 vs CS2; CS5 and 4 vs CS3; and CS5 vs CS4
Comparison groups	#ID	FDR	log2FC	regulated	COG_class	COG_class_annotation	GO_annotation	KEGG_annotation	Swissprot_annotation	TrEMBL_annotation	nr_annotation	nt_annotation
CS2_vs_CS1	gene.MD00G1002000	1.37443e-08	1.08947	up	--	--	--	--	--	Uncharacterized protein GN=PRUPE_ppa024275mg OS=Prunus persica (Peach) PE=4 SV=1	PREDICTED: uncharacterized protein LOC103955600 [Pyrus x bretschneideri]	PREDICTED: Pyrus x bretschneideri uncharacterized LOC103955600 (LOC103955600), mRNA
CS2_vs_CS1	gene.MD00G1005000	9.34604e-10	-1.28776	down	--	--	--	--	Pentatricopeptide repeat-containing protein At4g38010 GN=PCMP-E45 OS=Arabidopsis thaliana (Mouse-ear cress) PE=3 SV=1	Uncharacterized protein GN=PRUPE_ppa004873mg OS=Prunus persica (Peach) PE=4 SV=1	PREDICTED: pentatricopeptide repeat-containing protein At4g38010-like [Pyrus x bretschneideri]	PREDICTED: Pyrus x bretschneideri pentatricopeptide repeat-containing protein At4g38010-like (LOC103933324), mRNA
CS2_vs_CS1	gene.MD00G1005300	3.12184e-88	3.82386	up	--	--	Biological Process: cell wall macromolecule catabolic process (GO:0016998);;	--	--	Uncharacterized protein GN=PRUPE_ppa013811mg OS=Prunus persica (Peach) PE=4 SV=1	PREDICTED: uncharacterized protein LOC103439700 [Malus domestica]	PREDICTED: Malus x domestica uncharacterized LOC103439700 (LOC103439700), mRNA
CS2_vs_CS1	gene.MD00G1005600	1.04073e-22	3.76966	up	[ER]	--	Molecular Function: L-iditol 2-dehydrogenase activity (GO:0003939);; Molecular Function: zinc ion binding (GO:0008270);; Biological Process: oxidation-reduction process (GO:0055114);;	K00008|0.0|pop:POPTR_823499|L-iditol 2-dehydrogenase (EC:1.1.1.14)	Sorbitol dehydrogenase GN=SDH OS=Arabidopsis thaliana (Mouse-ear cress) PE=1 SV=1	Sorbitol dehydrogenase GN=SDH6 OS=Malus domestica (Apple) PE=2 SV=1	PREDICTED: sorbitol dehydrogenase-like [Malus domestica]	PREDICTED: Malus x domestica sorbitol dehydrogenase-like (LOC103439703), mRNA
CS2_vs_CS1	gene.MD00G1005700	2.08036e-136	1.75978	up	[ER]	--	Molecular Function: L-iditol 2-dehydrogenase activity (GO:0003939);; Molecular Function: zinc ion binding (GO:0008270);; Biological Process: oxidation-reduction process (GO:0055114);;	K00008|0.0|ath:AT5G51970|sorbitol dehydrogenase, putative / L-iditol 2-dehydrogenase, putative (EC:1.1.1.14)	Sorbitol dehydrogenase GN=SDH OS=Arabidopsis thaliana (Mouse-ear cress) PE=1 SV=1	NAD-dependent sorbitol dehydrogenase 9 OS=Malus domestica (Apple) PE=2 SV=1	PREDICTED: sorbitol dehydrogenase-like [Malus domestica]	PREDICTED: Malus x domestica sorbitol dehydrogenase-like (LOC103439704), mRNA
CS2_vs_CS1	gene.MD00G1006800	3.0297e-13	-2.184	down	[RTKL]	--	--	--	Probable LRR receptor-like serine/threonine-protein kinase RFK1 (Precursor) GN=RKF1 OS=Arabidopsis thaliana (Mouse-ear cress) PE=1 SV=1	Uncharacterized protein GN=PRUPE_ppa000808mg OS=Prunus persica (Peach) PE=4 SV=1	PREDICTED: probable LRR receptor-like serine/threonine-protein kinase RFK1 [Pyrus x bretschneideri]	PREDICTED: Pyrus x bretschneideri probable LRR receptor-like serine/threonine-protein kinase RFK1 (LOC103944710), mRNA
CS2_vs_CS1	gene.MD00G1007700	0.00701267	1.02348	up	--	--	Biological Process: regulation of transcription, DNA-templated (GO:0006355);; Biological Process: response to water deprivation (GO:0009414);; Biological Process: response to abscisic acid (GO:0009737);; Biological Process: hyperosmotic salinity response (GO:0042538);;	--	BES1/BZR1 homolog protein 4 GN=BEH4 OS=Arabidopsis thaliana (Mouse-ear cress) PE=1 SV=1	Uncharacterized protein GN=PRUPE_ppa008675mg OS=Prunus persica (Peach) PE=4 SV=1	PREDICTED: BES1/BZR1 homolog protein 4-like [Malus domestica]	PREDICTED: Malus x domestica BES1/BZR1 homolog protein 4-like (LOC103434918), mRNA
CS2_vs_CS1	gene.MD00G1009200	6.4124e-18	Inf	up	--	--	--	--	--	Uncharacterized protein GN=PRUPE_ppa026968mg OS=Prunus persica (Peach) PE=4 SV=1	PREDICTED: uncharacterized protein LOC103434909 [Malus domestica]	PREDICTED: Malus x domestica uncharacterized LOC103434909 (LOC103434909), mRNA
CS2_vs_CS1	gene.MD00G1013000	4.70809e-26	2.4512	up	[E]	Amino acid transport and metabolism	Molecular Function: oxidoreductase activity, acting on CH-OH group of donors (GO:0016614);; Biological Process: single-organism metabolic process (GO:0044710);; Molecular Function: mandelonitrile lyase activity (GO:0046593);; Molecular Function: flavin adenine dinucleotide binding (GO:0050660);; Biological Process: nitrile metabolic process (GO:0050898);;	K08248|0.0|vvi:100254058|hypothetical protein LOC100254058	(R)-mandelonitrile lyase 2 (Precursor) GN=MDL2 OS=Prunus dulcis (Almond) PE=1 SV=1	Uncharacterized protein GN=PRUPE_ppa022070mg OS=Prunus persica (Peach) PE=4 SV=1	PREDICTED: (R)-mandelonitrile lyase 2-like [Malus domestica]	PREDICTED: Malus x domestica (R)-mandelonitrile lyase 2-like (LOC103429895), mRNA
CS2_vs_CS1	gene.MD00G1015600	2.30434e-09	1.64026	up	[C]	Energy production and conversion	--	K01455|6e-81|vvi:100245575|hypothetical protein LOC100245575	--	Putative uncharacterized protein OS=Glycine max (Soybean) PE=2 SV=1	hypothetical protein CISIN_1g027367mg [Citrus sinensis]	PREDICTED: Pyrus x bretschneideri putative formamidase C869.04 (LOC103967744), transcript variant X2, mRNA
CS2_vs_CS1	gene.MD00G1015800	6.12594e-05	1.27258	up	--	--	--	--	LOB domain-containing protein 37 GN=K8K14.16 OS=Arabidopsis thaliana (Mouse-ear cress) PE=2 SV=1	Uncharacterized protein GN=PRUPE_ppa010480mg OS=Prunus persica (Peach) PE=4 SV=1	PREDICTED: LOB domain-containing protein 37-like [Malus domestica]	PREDICTED: Malus x domestica LOB domain-containing protein 37-like (LOC103403884), mRNA
CS2_vs_CS1	gene.MD00G1018700	1.12619e-54	1.26581	up	--	--	Molecular Function: iron ion binding (GO:0005506);; Cellular Component: cell wall (GO:0005618);; Cellular Component: plasma membrane (GO:0005886);; Biological Process: oxygen transport (GO:0015671);; Molecular Function: oxygen binding (GO:0019825);; Molecular Function: heme binding (GO:0020037);;	--	Non-symbiotic hemoglobin GN=GLB1 OS=Trema tomentosa (Poison peach) PE=1 SV=1	Non-symbiotic hemoglobin class 1 GN=GLB1 OS=Malus domestica (Apple) PE=2 SV=1	beta-galactosidase [Malus domestica]	Malus domestica galactosidase, beta 1 (GLB1), mRNA>gi|37903655|gb|AY224132.1| Malus x domestica non-symbiotic hemoglobin class 1 (GLB1) mRNA, complete cds
CS2_vs_CS1	gene.MD00G1031500	5.12033e-14	-4.66389	down	--	--	Molecular Function: zinc ion binding (GO:0008270);; Molecular Function: protein-disulfide reductase activity (GO:0047134);; Biological Process: oxidation-reduction process (GO:0055114);;	--	--	Uncharacterized protein GN=PRUPE_ppa017191mg OS=Prunus persica (Peach) PE=4 SV=1	PREDICTED: uncharacterized protein LOC103427985 [Malus domestica]	PREDICTED: Malus x domestica uncharacterized LOC103427985 (LOC103427985), mRNA
CS2_vs_CS1	gene.MD00G1032200	1.07039e-10	-2.13319	down	[IQR]	--	Molecular Function: prostaglandin-E2 9-reductase activity (GO:0050221);; Biological Process: oxidation-reduction process (GO:0055114);;	--	Salutaridine reductase GN=SALR OS=Papaver bracteatum (Great scarlet poppy) PE=1 SV=1	Uncharacterized protein GN=PRUPE_ppa009101mg OS=Prunus persica (Peach) PE=4 SV=1	PREDICTED: (+)-neomenthol dehydrogenase-like isoform X2 [Malus domestica]	PREDICTED: Malus x domestica (+)-neomenthol dehydrogenase-like (LOC103407258), transcript variant X5, mRNA
CS2_vs_CS1	gene.MD00G1032400	0.00483541	1.03616	up	[E]	Amino acid transport and metabolism	Molecular Function: serine-type carboxypeptidase activity (GO:0004185);; Biological Process: proteolysis (GO:0006508);;	K13289|0.0|pop:POPTR_1117480|hypothetical protein	Serine carboxypeptidase-like 48 (Precursor) GN=SCPL48 OS=Arabidopsis thaliana (Mouse-ear cress) PE=2 SV=2	Serine carboxypeptidase GN=Pm69 OS=Prunus mume (Japanese apricot) PE=2 SV=1	PREDICTED: serine carboxypeptidase-like [Malus domestica]	PREDICTED: Malus x domestica serine carboxypeptidase-like (LOC103407786), mRNA
CS2_vs_CS1	gene.MD00G1033500	0.00376798	-1.1642	down	--	--	Molecular Function: structural constituent of ribosome (GO:0003735);; Cellular Component: ribosome (GO:0005840);; Biological Process: translation (GO:0006412);;	--	--	Uncharacterized protein GN=PRUPE_ppa021388mg OS=Prunus persica (Peach) PE=4 SV=1	PREDICTED: uncharacterized protein LOC103928613 [Pyrus x bretschneideri]	PREDICTED: Pyrus x bretschneideri uncharacterized LOC103928613 (LOC103928613), transcript variant X2, mRNA
CS2_vs_CS1	gene.MD00G1035200	0.000112219	1.58016	up	--	--	Biological Process: metabolic process (GO:0008152);; Molecular Function: hydrolase activity, acting on glycosyl bonds (GO:0016798);; Molecular Function: metal ion binding (GO:0046872);;	K01176|2e-97|pop:POPTR_644125|hypothetical protein	Alpha-amylase (Precursor) GN=AMY1.1 OS=Vigna mungo (Black gram) PE=2 SV=1	Uncharacterized protein GN=PRUPE_ppa006152mg OS=Prunus persica (Peach) PE=4 SV=1	PREDICTED: alpha-amylase-like [Malus domestica]	PREDICTED: Malus x domestica alpha-amylase-like (LOC103436491), mRNA
CS2_vs_CS1	gene.MD00G1035800	2.30814e-69	4.50016	up	--	--	--	--	--	Uncharacterized protein GN=PRUPE_ppa010082mg OS=Prunus persica (Peach) PE=4 SV=1	PREDICTED: uncharacterized protein LOC103417628 [Malus domestica]	PREDICTED: Malus x domestica uncharacterized LOC103417628 (LOC103417628), mRNA
CS2_vs_CS1	gene.MD00G1035900	1.53219e-117	-1.47016	down	--	--	Molecular Function: heme binding (GO:0020037);; Molecular Function: metal ion binding (GO:0046872);;	--	Cytochrome b5 GN=CYB5 OS=Brassica oleracea var. botrytis (Cauliflower) PE=1 SV=1	Uncharacterized protein GN=PRUPE_ppa013234mg OS=Prunus persica (Peach) PE=4 SV=1	PREDICTED: cytochrome b5-like [Pyrus x bretschneideri]	PREDICTED: Malus x domestica cytochrome b5-like (LOC103424638), transcript variant X1, mRNA
CS2_vs_CS1	gene.MD00G1036100	1.42275e-08	1.93042	up	--	--	Molecular Function: monooxygenase activity (GO:0004497);; Molecular Function: iron ion binding (GO:0005506);; Molecular Function: electron carrier activity (GO:0009055);; Biological Process: fruit development (GO:0010154);; Molecular Function: oxidoreductase activity, acting on paired donors, with incorporation or reduction of molecular oxygen (GO:0016705);; Molecular Function: heme binding (GO:0…	--	Cytochrome P450 78A6 GN=T3A4.4 OS=Arabidopsis thaliana (Mouse-ear cress) PE=2 SV=1	Uncharacterized protein GN=PRUPE_ppa003997mg OS=Prunus persica (Peach) PE=4 SV=1	PREDICTED: cytochrome P450 78A6-like [Pyrus x bretschneideri]	PREDICTED: Malus x domestica cytochrome P450 78A9-like (LOC103406216), mRNA
CS2_vs_CS1	gene.MD00G1036300	2.58726e-13	-5.39767	down	--	--	Molecular Function: transcription regulatory region sequence-specific DNA binding (GO:0000976);; Molecular Function: transcription factor activity, sequence-specific DNA binding (GO:0003700);; Cellular Component: nucleus (GO:0005634);; Biological Process: regulation of transcription, DNA-templated (GO:0006355);;	--	Homeobox-leucine zipper protein ATHB-7 GN=ATHB-7 OS=Arabidopsis thaliana (Mouse-ear cress) PE=2 SV=2	Uncharacterized protein GN=PRUPE_ppa010647mg OS=Prunus persica (Peach) PE=4 SV=1	PREDICTED: homeobox-leucine zipper protein ATHB-12-like [Malus domestica]	PREDICTED: Malus x domestica homeobox-leucine zipper protein ATHB-12-like (LOC103426334), mRNA
CS2_vs_CS1	gene.MD00G1038500	1.95646e-15	-1.15169	down	--	--	Cellular Component: plastid (GO:0009536);;	--	--	Putative uncharacterized protein GN=VIT_18s0001g11640 OS=Vitis vinifera (Grape) PE=4 SV=1	PREDICTED: uncharacterized protein LOC103440453 [Malus domestica]	PREDICTED: Malus x domestica uncharacterized LOC103440453 (LOC103440453), mRNA
CS2_vs_CS1	gene.MD00G1039900	2.18945e-11	1.35625	up	--	--	Cellular Component: intracellular (GO:0005622);; Molecular Function: zinc ion binding (GO:0008270);;	--	Probable salt tolerance-like protein At1g78600 GN=At1g78600 OS=Arabidopsis thaliana (Mouse-ear cress) PE=1 SV=2	Uncharacterized protein GN=PRUPE_ppa011488mg OS=Prunus persica (Peach) PE=4 SV=1	PREDICTED: probable salt tolerance-like protein At1g78600 [Pyrus x bretschneideri]	PREDICTED: Pyrus x bretschneideri probable salt tolerance-like protein At1g78600 (LOC103937075), mRNA
CS2_vs_CS1	gene.MD00G1045700	0.000130417	1.47554	up	--	--	Molecular Function: zinc ion binding (GO:0008270);; Molecular Function: oxidoreductase activity (GO:0016491);; Biological Process: oxidation-reduction process (GO:0055114);;	K07119|2e-168|vvi:100256090|hypothetical protein LOC100256090	2-alkenal reductase (NADP(+)-dependent) GN=DBR OS=Nicotiana tabacum (Common tobacco) PE=1 SV=1	Uncharacterized protein GN=PRUPE_ppa008021mg OS=Prunus persica (Peach) PE=4 SV=1	PREDICTED: 2-alkenal reductase (NADP(+)-dependent)-like [Malus domestica]	PREDICTED: Malus x domestica 2-alkenal reductase (NADP(+)-dependent)-like (LOC103413130), mRNA
CS2_vs_CS1	gene.MD00G1057800	2.82094e-09	1.33456	up	--	--	--	--	--	Uncharacterized protein GN=PRUPE_ppa003655mg OS=Prunus persica (Peach) PE=4 SV=1	PREDICTED: uncharacterized protein LOC103427780 [Malus domestica]	PREDICTED: Malus x domestica uncharacterized LOC103427780 (LOC103427780), transcript variant X2, mRNA
CS2_vs_CS1	gene.MD00G1059000	1.5136e-26	1.23335	up	--	--	--	K00434|6e-07|sbi:SORBI_07g024880|hypothetical protein	Probable L-ascorbate peroxidase 3 OS=Oryza sativa subsp. japonica (Rice) PE=2 SV=1	Uncharacterized protein GN=PRUPE_ppa009538mg OS=Prunus persica (Peach) PE=4 SV=1	PREDICTED: L-ascorbate peroxidase 3, peroxisomal [Prunus mume]	PREDICTED: Malus x domestica uncharacterized LOC103409600 (LOC103409600), ncRNA
CS2_vs_CS1	gene.MD00G1061600	2.97908e-07	-1.0577	down	[R]	General function prediction only	--	K07152|1e-129|ath:AT3G08950|electron transport SCO1/SenC family protein	Protein SCO1 homolog 1, mitochondrial (Precursor) GN=T16O11.9 OS=Arabidopsis thaliana (Mouse-ear cress) PE=2 SV=1	Uncharacterized protein GN=PRUPE_ppa008999mg OS=Prunus persica (Peach) PE=4 SV=1	PREDICTED: protein SCO1 homolog 1, mitochondrial [Malus domestica]	PREDICTED: Malus x domestica protein SCO1 homolog 1, mitochondrial (LOC103426017), mRNA
CS2_vs_CS1	gene.MD00G1063500	3.50201e-06	2.33167	up	[RTKL]	--	Molecular Function: protein serine/threonine kinase activity (GO:0004674);; Molecular Function: ATP binding (GO:0005524);; Biological Process: protein phosphorylation (GO:0006468);;	--	Probable receptor-like protein kinase At1g11050 (Precursor) GN=At1g11050 OS=Arabidopsis thaliana (Mouse-ear cress) PE=2 SV=1	Uncharacterized protein GN=PRUPE_ppa024913mg OS=Prunus persica (Peach) PE=4 SV=1	PREDICTED: probable receptor-like protein kinase At1g11050 [Malus domestica]	PREDICTED: Malus x domestica probable receptor-like protein kinase At1g11050 (LOC103425214), mRNA
CS2_vs_CS1	gene.MD00G1064000	1.33832e-06	-1.06187	down	[RTKL]	--	Molecular Function: ATP binding (GO:0005524);; Biological Process: protein phosphorylation (GO:0006468);; Molecular Function: RNA polymerase II carboxy-terminal domain kinase activity (GO:0008353);;	--	Cyclin-dependent kinase B2-2 GN=CDKB2-2 OS=Arabidopsis thaliana (Mouse-ear cress) PE=1 SV=2	Uncharacterized protein GN=PRUPE_ppa008892mg OS=Prunus persica (Peach) PE=4 SV=1	PREDICTED: cyclin-dependent kinase B2-2-like [Malus domestica]	PREDICTED: Malus x domestica cyclin-dependent kinase B2-2-like (LOC103443122), mRNA
CS2_vs_CS1	gene.MD00G1065000	0.000630352	1.84062	up	--	--	--	K11838|5e-46|pop:POPTR_561195|hypothetical protein	Ubiquitin carboxyl-terminal hydrolase 13 GN=UBP13 OS=Arabidopsis thaliana (Mouse-ear cress) PE=1 SV=1	Uncharacterized protein GN=PRUPE_ppa006840mg OS=Prunus persica (Peach) PE=4 SV=1	PREDICTED: uncharacterized protein LOC103438638 isoform X3 [Malus domestica]	PREDICTED: Malus x domestica uncharacterized LOC103438638 (LOC103438638), transcript variant X3, mRNA
CS2_vs_CS1	gene.MD00G1068600	6.4429e-70	-1.16472	down	--	--	Biological Process: protein transport (GO:0015031);; Cellular Component: integral component of membrane (GO:0016021);;	--	Secretory carrier-associated membrane protein 4 GN=SCAMP4 OS=Arabidopsis thaliana (Mouse-ear cress) PE=2 SV=1	Uncharacterized protein GN=PRUPE_ppa009893mg OS=Prunus persica (Peach) PE=4 SV=1	PREDICTED: secretory carrier-associated membrane protein 4-like [Malus domestica]	PREDICTED: Pyrus x bretschneideri secretory carrier-associated membrane protein 4-like (LOC103938770), mRNA
CS2_vs_CS1	gene.MD00G1072500	2.20646e-24	-4.40552	down	--	--	Molecular Function: 3-beta-hydroxy-delta5-steroid dehydrogenase activity (GO:0003854);; Biological Process: steroid biosynthetic process (GO:0006694);; Biological Process: oxidation-reduction process (GO:0055114);;	--	Tetraketide alpha-pyrone reductase 1 GN=F23E12.20 OS=Arabidopsis thaliana (Mouse-ear cress) PE=2 SV=1	Uncharacterized protein GN=PRUPE_ppa009107mg OS=Prunus persica (Peach) PE=4 SV=1	PREDICTED: tetraketide alpha-pyrone reductase 1-like [Pyrus x bretschneideri]	PREDICTED: Pyrus x bretschneideri tetraketide alpha-pyrone reductase 1-like (LOC103932343), transcript variant X2, mRNA
CS2_vs_CS1	gene.MD00G1072600	9.30545e-08	1.03626	up	--	--	--	--	--	--	--	PREDICTED: Malus x domestica uncharacterized LOC103435457 (LOC103435457), transcript variant X2, mRNA
CS2_vs_CS1	gene.MD00G1073400	1.56593e-201	-1.56566	down	--	--	--	--	--	Uncharacterized protein GN=PRUPE_ppa012051mg OS=Prunus persica (Peach) PE=4 SV=1	PREDICTED: uncharacterized protein LOC103416102 [Malus domestica]	PREDICTED: Malus x domestica uncharacterized LOC103416102 (LOC103416102), mRNA
CS2_vs_CS1	gene.MD00G1075700	1.70819e-70	-1.62801	down	--	--	--	--	--	Putative uncharacterized protein (Fragment) GN=VIT_17s0000g00010 OS=Vitis vinifera (Grape) PE=4 SV=1	PREDICTED: uncharacterized protein LOC103438663 [Malus domestica]	PREDICTED: Malus x domestica uncharacterized LOC103438663 (LOC103438663), mRNA
CS2_vs_CS1	gene.MD00G1076300	2.0892e-89	1.04413	up	--	--	Molecular Function: calcium ion binding (GO:0005509);; Cellular Component: endoplasmic reticulum (GO:0005783);; Biological Process: protein folding (GO:0006457);; Molecular Function: unfolded protein binding (GO:0051082);;	K08054|0.0|rcu:RCOM_1503060|calnexin, putative	Calnexin homolog (Precursor) OS=Glycine max (Soybean) PE=2 SV=1	Uncharacterized protein GN=PRUPE_ppa003899mg OS=Prunus persica (Peach) PE=4 SV=1	PREDICTED: calnexin homolog [Malus domestica]	PREDICTED: Malus x domestica calnexin homolog (LOC103438666), mRNA
CS2_vs_CS1	gene.MD00G1076700	2.29245e-09	-1.61285	down	[J]	Translation, ribosomal structure and biogenesis	Molecular Function: carbon-nitrogen ligase activity, with glutamine as amido-N-donor (GO:0016884);;	--	Glutamyl-tRNA(Gln) amidotransferase subunit A, chloroplastic/mitochondrial (Precursor) GN=GATA OS=Vitis vinifera (Grape) PE=3 SV=1	Uncharacterized protein GN=PRUPE_ppa003160mg OS=Prunus persica (Peach) PE=4 SV=1	PREDICTED: glutamyl-tRNA(Gln) amidotransferase subunit A-like [Malus domestica]	PREDICTED: Malus x domestica glutamyl-tRNA(Gln) amidotransferase subunit A-like (LOC103438668), mRNA
CS2_vs_CS1	gene.MD00G1082000	5.07742e-07	1.18605	up	--	--	--	--	Organ-specific protein P4 OS=Pisum sativum (Garden pea) PE=2 SV=1	Uncharacterized protein GN=PRUPE_ppa013490mg OS=Prunus persica (Peach) PE=4 SV=1	PREDICTED: organ-specific protein S2-like [Malus domestica]	PREDICTED: Malus x domestica organ-specific protein S2-like (LOC103454248), mRNA
CS2_vs_CS1	gene.MD00G1085100	0	2.1832	up	[F]	Nucleotide transport and metabolism	Molecular Function: CTP synthase activity (GO:0003883);; Biological Process: pyrimidine nucleotide biosynthetic process (GO:0006221);;	K01937|0.0|pop:POPTR_711917|CTP synthase (EC:6.3.4.2)	--	Uncharacterized protein GN=PRUPE_ppa002621mg OS=Prunus persica (Peach) PE=4 SV=1	PREDICTED: CTP synthase-like [Pyrus x bretschneideri]	PREDICTED: Malus x domestica CTP synthase-like (LOC103435334), transcript variant X2, mRNA
CS2_vs_CS1	gene.MD00G1085200	4.94256e-13	1.34125	up	--	--	Molecular Function: methyltransferase activity (GO:0008168);; Biological Process: methylation (GO:0032259);;	--	--	Uncharacterized protein GN=PRUPE_ppa008291mg OS=Prunus persica (Peach) PE=4 SV=1	PREDICTED: probable polyamine aminopropyl transferase [Malus domestica]	PREDICTED: Malus x domestica probable polyamine aminopropyl transferase (LOC103435335), mRNA
CS2_vs_CS1	gene.MD00G1086500	1.41216e-11	-2.06119	down	--	--	--	--	--	Uncharacterized protein GN=PRUPE_ppa004142mg OS=Prunus persica (Peach) PE=4 SV=1	PREDICTED: uncharacterized protein LOC103436813 [Malus domestica]	PREDICTED: Malus x domestica uncharacterized LOC103436813 (LOC103436813), mRNA
CS2_vs_CS1	gene.MD00G1090300	0.00142261	1.29754	up	--	--	--	--	--	--	PREDICTED: uncharacterized protein LOC103966726 isoform X2 [Pyrus x bretschneideri]	PREDICTED: Malus x domestica uncharacterized LOC108172896 (LOC108172896), ncRNA
CS2_vs_CS1	gene.MD00G1090500	6.24662e-06	1.73506	up	--	--	--	--	--	--	--	PREDICTED: Malus x domestica uncharacterized LOC103455038 (LOC103455038), transcript variant X4, mRNA
CS2_vs_CS1	gene.MD00G1092500	3.77222e-09	-1.72913	down	--	--	--	--	Snakin-2 (Precursor) GN=SN2 OS=Solanum tuberosum (Potato) PE=1 SV=1	Uncharacterized protein GN=PRUPE_ppa013714mg OS=Prunus persica (Peach) PE=4 SV=1	PREDICTED: gibberellin-regulated protein 1-like [Malus domestica]	PREDICTED: Pyrus x bretschneideri snakin-2 (LOC103927804), mRNA
CS2_vs_CS1	gene.MD00G1093200	7.11764e-10	-1.46955	down	--	--	--	--	--	Putative uncharacterized protein GN=ARALYDRAFT_482377 OS=Arabidopsis lyrata subsp. lyrata (Lyre-leaved rock-cress) PE=4 SV=1	PREDICTED: uncharacterized protein LOC103434932 [Malus domestica]	PREDICTED: Malus x domestica uncharacterized LOC103434932 (LOC103434932), mRNA
CS2_vs_CS1	gene.MD00G1094100	1.90657e-06	-1.34888	down	[P]	Inorganic ion transport and metabolism	--	--	Cation/H(+) antiporter 18 GN=CHX18 OS=Arabidopsis thaliana (Mouse-ear cress) PE=2 SV=1	Uncharacterized protein GN=PRUPE_ppa001527mg OS=Prunus persica (Peach) PE=4 SV=1	PREDICTED: cation/H(+) antiporter 18-like [Malus domestica]	PREDICTED: Malus x domestica cation/H(+) antiporter 18-like (LOC103404175), transcript variant X3, mRNA
CS2_vs_CS1	gene.MD00G1095300	4.59222e-40	1.09118	up	[L]	Replication, recombination and repair	Molecular Function: damaged DNA binding (GO:0003684);; Molecular Function: ATP binding (GO:0005524);; Cellular Component: nucleus (GO:0005634);; Biological Process: mismatch repair (GO:0006298);; Molecular Function: mismatched DNA binding (GO:0030983);; Biological Process: DNA-dependent DNA replication maintenance of fidelity (GO:0045005);;	K07456|0.0|pop:POPTR_1075519|hypothetical protein	DNA mismatch repair protein MSH1, mitochondrial (Precursor) GN=K7M2.9 OS=Arabidopsis thaliana (Mouse-ear cress) PE=1 SV=1	Uncharacterized protein GN=PRUPE_ppa001018mg OS=Prunus persica (Peach) PE=4 SV=1	PREDICTED: endonuclease MutS2 [Malus domestica]	PREDICTED: Malus x domestica endonuclease MutS2 (LOC103446422), mRNA
CS2_vs_CS1	gene.MD00G1095600	1.42548e-107	1.23225	up	--	--	--	--	--	Uncharacterized protein GN=PRUPE_ppa004831mg OS=Prunus persica (Peach) PE=4 SV=1	PREDICTED: putative nuclear RNA export factor SDE5 [Malus domestica]	PREDICTED: Malus x domestica putative nuclear RNA export factor SDE5 (LOC103446420), mRNA
CS2_vs_CS1	gene.MD00G1096000	0	4.65387	up	[O]	Posttranslational modification, protein turnover, chaperones	Molecular Function: zinc ion binding (GO:0008270);; Molecular Function: ligase activity (GO:0016874);;	--	E3 ubiquitin-protein ligase RMA1H1 GN=RMA1H1 OS=Capsicum annuum (Bell pepper) PE=1 SV=1	Uncharacterized protein GN=PRUPE_ppa008909mg OS=Prunus persica (Peach) PE=4 SV=1	PREDICTED: E3 ubiquitin-protein ligase RMA1H1-like [Malus domestica]	PREDICTED: Malus x domestica E3 ubiquitin-protein ligase RMA1H1-like (LOC103446415), mRNA
CS2_vs_CS1	gene.MD00G1097700	0.00869463	1.10765	up	--	--	--	--	--	--	--	PREDICTED: Malus x domestica calcium-transporting ATPase 2, plasma membrane-type-like (LOC103428791), mRNA
CS2_vs_CS1	gene.MD00G1098500	9.17473e-13	-1.14247	down	[I]	Lipid transport and metabolism	Molecular Function: catalytic activity (GO:0003824);; Biological Process: metabolic process (GO:0008152);; Biological Process: response to stimulus (GO:0050896);;	K05605|0.0|vvi:100256133|hypothetical protein LOC100256133	3-hydroxyisobutyryl-CoA hydrolase 1 GN=CHY1 OS=Arabidopsis thaliana (Mouse-ear cress) PE=1 SV=1	Uncharacterized protein GN=PRUPE_ppa007082mg OS=Prunus persica (Peach) PE=4 SV=1	PREDICTED: 3-hydroxyisobutyryl-CoA hydrolase 1-like isoform X2 [Malus domestica]	PREDICTED: Malus x domestica 3-hydroxyisobutyryl-CoA hydrolase 1-like (LOC103412694), mRNA
CS2_vs_CS1	gene.MD00G1105000	2.46358e-13	2.37677	up	--	--	--	--	21 kDa protein (Precursor) OS=Daucus carota (Carrot) PE=2 SV=1	Uncharacterized protein GN=PRUPE_ppa011831mg OS=Prunus persica (Peach) PE=4 SV=1	PREDICTED: 21 kDa protein [Malus domestica]	PREDICTED: Malus x domestica 21 kDa protein (LOC103439474), mRNA
CS2_vs_CS1	gene.MD00G1105100	8.05878e-55	Inf	up	--	--	--	--	21 kDa protein (Precursor) OS=Daucus carota (Carrot) PE=2 SV=1	Uncharacterized protein GN=PRUPE_ppa011478mg OS=Prunus persica (Peach) PE=4 SV=1	PREDICTED: 21 kDa protein [Malus domestica]	PREDICTED: Malus x domestica 21 kDa protein (LOC103440934), mRNA
CS2_vs_CS1	gene.MD00G1106600	3.39986e-176	-3.91086	down	--	--	--	--	--	Uncharacterized protein GN=PRUPE_ppa010043mg OS=Prunus persica (Peach) PE=4 SV=1	PREDICTED: protein YLS9-like [Malus domestica]	PREDICTED: Malus x domestica protein YLS9-like (LOC103430030), mRNA
CS2_vs_CS1	gene.MD00G1111700	1.13484e-17	1.49279	up	[RTKL]	--	Biological Process: activation of MAPKK activity (GO:0000186);; Molecular Function: MAP kinase kinase kinase activity (GO:0004709);; Molecular Function: ATP binding (GO:0005524);; Cellular Component: plasma membrane (GO:0005886);;	--	Probable serine/threonine-protein kinase At1g01540 GN=At1g01540 OS=Arabidopsis thaliana (Mouse-ear cress) PE=1 SV=2	Uncharacterized protein GN=PRUPE_ppa004985mg OS=Prunus persica (Peach) PE=4 SV=1	PREDICTED: LOW QUALITY PROTEIN: probable serine/threonine-protein kinase At1g01540 [Pyrus x bretschneideri]	PREDICTED: Pyrus x bretschneideri probable serine/threonine-protein kinase At1g01540 (LOC103956307), mRNA
CS2_vs_CS1	gene.MD00G1115200	1.17136e-13	-1.06902	down	--	--	--	--	Dof zinc finger protein DOF3.7 GN=F21F14.20 OS=Arabidopsis thaliana (Mouse-ear cress) PE=1 SV=2	Uncharacterized protein GN=PRUPE_ppa018188mg OS=Prunus persica (Peach) PE=4 SV=1	PREDICTED: dof zinc finger protein DOF2.1-like [Malus domestica]	PREDICTED: Malus x domestica dof zinc finger protein DOF2.1-like (LOC103435080), mRNA
CS2_vs_CS1	gene.MD00G1118800	4.95556e-10	-1.81138	down	--	--	Cellular Component: membrane (GO:0016020);;	--	WAT1-related protein At3g30340 GN=At3g30340 OS=Arabidopsis thaliana (Mouse-ear cress) PE=2 SV=1	Uncharacterized protein GN=PRUPE_ppa007863mg OS=Prunus persica (Peach) PE=4 SV=1	PREDICTED: WAT1-related protein At3g30340-like [Malus domestica]	PREDICTED: Malus x domestica WAT1-related protein At3g30340-like (LOC103431076), mRNA
CS2_vs_CS1	gene.MD00G1123600	0.00482919	1.6641	up	[R]	General function prediction only	--	--	--	Uncharacterized protein GN=PRUPE_ppa010334mg OS=Prunus persica (Peach) PE=4 SV=1	PREDICTED: haloacid dehalogenase-like hydrolase domain-containing protein Sgpp [Pyrus x bretschneideri]	PREDICTED: Pyrus x bretschneideri haloacid dehalogenase-like hydrolase domain-containing protein Sgpp (LOC103965498), mRNA
CS2_vs_CS1	gene.MD00G1124900	1.80417e-32	1.14566	up	--	--	Molecular Function: structural constituent of ribosome (GO:0003735);; Cellular Component: ribosome (GO:0005840);; Biological Process: translation (GO:0006412);;	--	Uncharacterized protein At5g19025 GN=At5g19025 OS=Arabidopsis thaliana (Mouse-ear cress) PE=2 SV=3	Uncharacterized protein GN=PRUPE_ppa010896mg OS=Prunus persica (Peach) PE=4 SV=1	PREDICTED: uncharacterized protein At5g19025 [Malus domestica]	PREDICTED: Malus x domestica uncharacterized protein At5g19025 (LOC103404449), mRNA
CS2_vs_CS1	gene.MD00G1125200	9.24161e-05	1.59547	up	--	--	--	--	--	Uncharacterized protein GN=PRUPE_ppa014215mg OS=Prunus persica (Peach) PE=4 SV=1	hypothetical protein PRUPE_ppa014215mg [Prunus persica]	PREDICTED: Prunus mume uncharacterized LOC103330017 (LOC103330017), ncRNA
CS2_vs_CS1	gene.MD00G1125400	4.32636e-34	-2.27149	down	--	--	Cellular Component: extracellular region (GO:0005576);; Biological Process: unidimensional cell growth (GO:0009826);; Biological Process: plant-type cell wall loosening (GO:0009828);; Biological Process: plant-type cell wall modification involved in multidimensional cell growth (GO:0009831);; Cellular Component: membrane (GO:0016020);;	--	Expansin-A15 (Precursor) GN=T17M13.26 OS=Arabidopsis thaliana (Mouse-ear cress) PE=2 SV=2	Expansin 3 GN=EXP03 OS=Malus domestica (Apple) PE=2 SV=1	PREDICTED: expansin-A10 [Malus domestica]	PREDICTED: Malus x domestica expansin-A10 (LOC103404452), mRNA
CS2_vs_CS1	gene.MD00G1126700	7.31409e-10	3.33324	up	--	--	--	--	GEM-like protein 4 GN=At5g08350 OS=Arabidopsis thaliana (Mouse-ear cress) PE=2 SV=1	Uncharacterized protein GN=PRUPE_ppa026708mg OS=Prunus persica (Peach) PE=4 SV=1	PREDICTED: GEM-like protein 6 [Malus domestica]	PREDICTED: Malus x domestica GEM-like protein 6 (LOC103403390), mRNA
CS2_vs_CS1	gene.MD00G1126800	6.55132e-11	1.12112	up	--	--	Molecular Function: DNA binding (GO:0003677);; Molecular Function: chromatin binding (GO:0003682);; Cellular Component: nucleus (GO:0005634);;	--	Transcription factor DIVARICATA GN=DIVARICATA OS=Antirrhinum majus (Garden snapdragon) PE=2 SV=1	MYBR domain class transcription factor GN=MYBR15 OS=Malus domestica (Apple) PE=2 SV=1	transcription factor DIVARICATA [Malus domestica]	PREDICTED: Malus x domestica transcription factor DIVARICATA (MYBR15), transcript variant X5, mRNA
CS2_vs_CS1	gene.MD00G1130600	5.56346e-31	1.50626	up	--	--	--	--	Lysine histidine transporter-like 3 GN=At1g61270 OS=Arabidopsis thaliana (Mouse-ear cress) PE=3 SV=2	Uncharacterized protein GN=PRUPE_ppa006034mg OS=Prunus persica (Peach) PE=4 SV=1	PREDICTED: vacuolar amino acid transporter 1-like [Malus domestica]	PREDICTED: Malus x domestica vacuolar amino acid transporter 1-like (LOC103416993), mRNA
CS2_vs_CS1	gene.MD00G1131300	6.70253e-05	1.1495	up	--	--	Molecular Function: structural constituent of ribosome (GO:0003735);; Cellular Component: ribosome (GO:0005840);; Biological Process: translation (GO:0006412);;	--	Uncharacterized protein At5g19025 GN=At5g19025 OS=Arabidopsis thaliana (Mouse-ear cress) PE=2 SV=3	Uncharacterized protein GN=PRUPE_ppa010896mg OS=Prunus persica (Peach) PE=4 SV=1	PREDICTED: uncharacterized protein At5g19025 [Malus domestica]	PREDICTED: Malus x domestica uncharacterized protein At5g19025 (LOC103404449), mRNA
CS2_vs_CS1	gene.MD00G1133800	0.000185214	-1.14175	down	--	--	--	--	21 kDa protein (Precursor) OS=Daucus carota (Carrot) PE=2 SV=1	Uncharacterized protein GN=PRUPE_ppa011318mg OS=Prunus persica (Peach) PE=4 SV=1	PREDICTED: 21 kDa protein-like [Malus domestica]	PREDICTED: Malus x domestica 21 kDa protein-like (LOC103451558), mRNA
CS2_vs_CS1	gene.MD00G1140000	4.48449e-59	3.22388	up	--	--	Cellular Component: integral component of membrane (GO:0016021);;	--	Amino acid permease 3 GN=AAP3 OS=Arabidopsis thaliana (Mouse-ear cress) PE=1 SV=2	Uncharacterized protein GN=PRUPE_ppa004920mg OS=Prunus persica (Peach) PE=4 SV=1	PREDICTED: amino acid permease 3-like [Pyrus x bretschneideri]	PREDICTED: Pyrus x bretschneideri amino acid permease 3-like (LOC103931636), mRNA>gi|694423233|ref|XM_009341152.1| PREDICTED: Pyrus x bretschneideri amino acid permease 3-like (LOC103931637), mRNA
CS2_vs_CS1	gene.MD00G1141700	0.00024351	-1.23988	down	[R]	General function prediction only	Molecular Function: alditol:NADP+ 1-oxidoreductase activity (GO:0004032);; Biological Process: oxidation-reduction process (GO:0055114);;	--	Aldo-keto reductase family 4 member C10 GN=AKR4C10 OS=Arabidopsis thaliana (Mouse-ear cress) PE=1 SV=1	Uncharacterized protein GN=PRUPE_ppa008905mg OS=Prunus persica (Peach) PE=4 SV=1	PREDICTED: aldo-keto reductase family 4 member C10-like [Malus domestica]	PREDICTED: Malus x domestica aldo-keto reductase family 4 member C10-like (LOC103433453), mRNA
CS2_vs_CS1	gene.MD00G1144400	4.86359e-16	2.02435	up	--	--	--	--	--	Uncharacterized protein GN=PRUPE_ppa006474mg OS=Prunus persica (Peach) PE=4 SV=1	PREDICTED: uncharacterized protein LOC103456208 [Malus domestica]	PREDICTED: Malus x domestica uncharacterized LOC103456208 (LOC103456208), mRNA
CS2_vs_CS1	gene.MD00G1145000	1.50722e-08	-1.06426	down	--	--	Molecular Function: zinc ion binding (GO:0008270);;	--	E3 ubiquitin ligase BIG BROTHER-related GN=BBR OS=Arabidopsis thaliana (Mouse-ear cress) PE=2 SV=1	Uncharacterized protein GN=PRUPE_ppa008876mg OS=Prunus persica (Peach) PE=4 SV=1	PREDICTED: E3 ubiquitin ligase BIG BROTHER-related-like isoform X1 [Malus domestica]	PREDICTED: Malus x domestica E3 ubiquitin ligase BIG BROTHER-related-like (LOC103446374), transcript variant X1, mRNA
CS2_vs_CS1	gene.MD00G1149300	5.09501e-15	3.68942	up	--	--	--	--	--	Uncharacterized protein GN=PRUPE_ppa003496mg OS=Prunus persica (Peach) PE=4 SV=1	PREDICTED: uncharacterized protein LOC103451082 [Malus domestica]	PREDICTED: Malus x domestica uncharacterized LOC103451082 (LOC103451082), mRNA
CS2_vs_CS1	gene.MD00G1152500	6.93963e-11	1.49027	up	--	--	--	--	--	Uncharacterized protein (Fragment) GN=PRUPE_ppa025936mg OS=Prunus persica (Peach) PE=4 SV=1	PREDICTED: uncharacterized protein LOC103407413 [Malus domestica]	PREDICTED: Malus x domestica uncharacterized LOC103407413 (LOC103407413), mRNA
CS2_vs_CS1	gene.MD00G1156200	5.35929e-24	-1.03531	down	[G]	Carbohydrate transport and metabolism	Biological Process: carbohydrate metabolic process (GO:0005975);; Molecular Function: glycogen phosphorylase activity (GO:0008184);; Cellular Component: amyloplast (GO:0009501);; Cellular Component: chloroplast (GO:0009507);; Molecular Function: pyridoxal phosphate binding (GO:0030170);;	K00688|0.0|rcu:RCOM_0524530|glycogen phosphorylase, putative (EC:2.4.1.1)	Alpha-1,4 glucan phosphorylase L isozyme, chloroplastic/amyloplastic (Precursor) OS=Ipomoea batatas (Sweet potato) PE=2 SV=1	Phosphorylase OS=Glycine max (Soybean) PE=3 SV=1	PREDICTED: alpha-1,4 glucan phosphorylase L isozyme, chloroplastic/amyloplastic-like [Pyrus x bretschneideri]	PREDICTED: Pyrus x bretschneideri alpha-1,4 glucan phosphorylase L isozyme, chloroplastic/amyloplastic-like (LOC103951000), mRNA
CS2_vs_CS1	gene.MD00G1160200	1.06142e-19	-1.61314	down	--	--	Molecular Function: nucleotide binding (GO:0000166);; Cellular Component: extracellular region (GO:0005576);; Biological Process: toxin catabolic process (GO:0009407);; Biological Process: response to cyclopentenone (GO:0010583);; Molecular Function: ATPase activity, coupled to transmembrane movement of substances (GO:0042626);;	--	ABC transporter A family member 2 GN=T23J7.60 OS=Arabidopsis thaliana (Mouse-ear cress) PE=2 SV=1	Uncharacterized protein GN=PRUPE_ppa020387mg OS=Prunus persica (Peach) PE=4 SV=1	PREDICTED: ABC transporter A family member 2-like [Malus domestica]	PREDICTED: Malus x domestica ABC transporter A family member 2-like (LOC103438057), mRNA
CS2_vs_CS1	gene.MD00G1160300	4.41546e-51	-2.2241	down	[V]	Defense mechanisms	Molecular Function: nucleotide binding (GO:0000166);; Molecular Function: ATPase activity (GO:0016887);;	--	ABC transporter A family member 12 OS=Arabidopsis thaliana (Mouse-ear cress) PE=3 SV=1	Uncharacterized protein GN=PRUPE_ppa000642mg OS=Prunus persica (Peach) PE=4 SV=1	PREDICTED: ABC transporter A family member 10-like [Malus domestica]	PREDICTED: Malus x domestica ABC transporter A family member 10-like (LOC103438058), transcript variant X2, mRNA
CS2_vs_CS1	gene.MD00G1161000	5.3761e-06	-1.19262	down	[R]	General function prediction only	Cellular Component: Golgi apparatus (GO:0005794);; Biological Process: protein secretion (GO:0009306);;	--	Synaptotagmin-2 GN=T20H2.13 OS=Arabidopsis thaliana (Mouse-ear cress) PE=2 SV=1	Uncharacterized protein GN=PRUPE_ppa003953mg OS=Prunus persica (Peach) PE=4 SV=1	PREDICTED: synaptotagmin-2-like [Malus domestica]	PREDICTED: Malus x domestica synaptotagmin-2-like (LOC103420861), mRNA
CS2_vs_CS1	gene.MD00G1165400	2.1592e-16	-2.03718	down	[V]	Defense mechanisms	Molecular Function: ATP binding (GO:0005524);; Biological Process: obsolete ATP catabolic process (GO:0006200);; Molecular Function: maltose-transporting ATPase activity (GO:0015423);; Cellular Component: membrane (GO:0016020);;	--	ABC transporter G family member 3 GN=F24D13.14 OS=Arabidopsis thaliana (Mouse-ear cress) PE=1 SV=2	Uncharacterized protein GN=PRUPE_ppa002046mg OS=Prunus persica (Peach) PE=4 SV=1	PREDICTED: ABC transporter G family member 3 [Pyrus x bretschneideri]	PREDICTED: Pyrus x bretschneideri ABC transporter G family member 3 (LOC103947696), mRNA
CS2_vs_CS1	gene.MD00G1166100	1.22337e-47	1.65723	up	--	--	--	--	--	Uncharacterized protein GN=PRUPE_ppa013100mg OS=Prunus persica (Peach) PE=4 SV=1	PREDICTED: uncharacterized protein LOC103420240 [Malus domestica]	PREDICTED: Malus x domestica uncharacterized LOC103420240 (LOC103420240), mRNA
CS2_vs_CS1	gene.MD00G1169600	6.12033e-89	1.52471	up	--	--	Molecular Function: DNA binding (GO:0003677);; Molecular Function: chromatin binding (GO:0003682);; Molecular Function: transcription factor activity, sequence-specific DNA binding (GO:0003700);; Biological Process: regulation of transcription, DNA-templated (GO:0006355);; Molecular Function: zinc ion binding (GO:0008270);;	--	Transcription factor MYB1R1 OS=Solanum tuberosum (Potato) PE=2 SV=1	MYBR domain class transcription factor GN=MYBR11 OS=Malus domestica (Apple) PE=2 SV=1	PREDICTED: transcription factor MYB1R1-like [Malus domestica]	PREDICTED: Malus x domestica transcription factor MYB1R1-like (LOC103427509), mRNA
CS2_vs_CS1	gene.MD00G1171800	1.01267e-27	1.25076	up	[G]	Carbohydrate transport and metabolism	Molecular Function: alpha,alpha-trehalose-phosphate synthase (UDP-forming) activity (GO:0003825);; Molecular Function: trehalose-phosphatase activity (GO:0004805);; Biological Process: trehalose biosynthetic process (GO:0005992);;	--	Probable alpha,alpha-trehalose-phosphate synthase [UDP-forming] 10 GN=T13D8.4 OS=Arabidopsis thaliana (Mouse-ear cress) PE=2 SV=1	Uncharacterized protein GN=PRUPE_ppa001397mg OS=Prunus persica (Peach) PE=4 SV=1	PREDICTED: probable alpha,alpha-trehalose-phosphate synthase [UDP-forming] 10 [Malus domestica]	PREDICTED: Malus x domestica probable alpha,alpha-trehalose-phosphate synthase [UDP-forming] 10 (LOC103437743), mRNA
CS2_vs_CS1	gene.MD00G1172100	1.28879e-40	-2.30883	down	[O]	Posttranslational modification, protein turnover, chaperones	--	K03695|0.0|vvi:100252611|hypothetical protein LOC100252611	Chaperone protein ClpB3, chloroplastic (Precursor) GN=T20K14.60 OS=Arabidopsis thaliana (Mouse-ear cress) PE=2 SV=1	Uncharacterized protein GN=PRUPE_ppa000855mg OS=Prunus persica (Peach) PE=4 SV=1	PREDICTED: chaperone protein ClpB3, chloroplastic [Malus domestica]	PREDICTED: Malus x domestica chaperone protein ClpB3, chloroplastic (LOC103404495), mRNA
CS2_vs_CS1	gene.MD00G1178300	5.81201e-05	-1.67945	down	[C]	Energy production and conversion	Cellular Component: chloroplast thylakoid membrane (GO:0009535);; Cellular Component: chloroplast envelope (GO:0009941);; Biological Process: chlorophyll biosynthetic process (GO:0015995);; Molecular Function: oxidoreductase activity, acting on the CH-CH group of donors, NAD or NADP as acceptor (GO:0016628);; Biological Process: cysteine biosynthetic process (GO:0019344);; Biological Process: pho…	K10960|0.0|vvi:100253115|hypothetical protein LOC100253115	Geranylgeranyl diphosphate reductase, chloroplastic (Precursor) GN=CHLP OS=Nicotiana tabacum (Common tobacco) PE=2 SV=1	Uncharacterized protein GN=PRUPE_ppa019702mg OS=Prunus persica (Peach) PE=4 SV=1	PREDICTED: geranylgeranyl diphosphate reductase, chloroplastic-like [Malus domestica]	PREDICTED: Malus x domestica geranylgeranyl diphosphate reductase, chloroplastic-like (LOC103441948), mRNA
CS2_vs_CS1	gene.MD00G1184200	3.06738e-06	1.22632	up	--	--	Biological Process: glutamine metabolic process (GO:0006541);; Molecular Function: gamma-glutamyl-peptidase activity (GO:0034722);;	K01307|9e-174|rcu:RCOM_0106060|Gamma-glutamyl hydrolase precursor, putative (EC:3.4.19.9)	Gamma-glutamyl hydrolase (Precursor) GN=F9K20.28 OS=Arabidopsis thaliana (Mouse-ear cress) PE=1 SV=2	Uncharacterized protein GN=PRUPE_ppa006962mg OS=Prunus persica (Peach) PE=4 SV=1	PREDICTED: gamma-glutamyl hydrolase 2 [Malus domestica]	PREDICTED: Malus x domestica gamma-glutamyl hydrolase 2 (LOC103448789), mRNA
CS2_vs_CS1	gene.MD00G1186900	1.37933e-49	-1.25105	down	[CR]	--	Molecular Function: zinc ion binding (GO:0008270);; Molecular Function: oxidoreductase activity (GO:0016491);; Biological Process: oxidation-reduction process (GO:0055114);;	--	Quinone oxidoreductase-like protein At1g23740, chloroplastic (Precursor) GN=At1g23740 OS=Arabidopsis thaliana (Mouse-ear cress) PE=1 SV=2	Uncharacterized protein GN=PRUPE_ppa008712mg OS=Prunus persica (Peach) PE=4 SV=1	PREDICTED: 2-methylene-furan-3-one reductase [Pyrus x bretschneideri]	PREDICTED: Malus x domestica 2-methylene-furan-3-one reductase-like (LOC103442256), partial mRNA
CS2_vs_CS1	gene.MD00G1190500	1.72567e-10	1.58403	up	[R]	General function prediction only	--	--	--	Uncharacterized protein GN=PRUPE_ppa011710mg OS=Prunus persica (Peach) PE=4 SV=1	PREDICTED: haloacid dehalogenase-like hydrolase domain-containing protein Sgpp [Pyrus x bretschneideri]	PREDICTED: Malus x domestica haloacid dehalogenase-like hydrolase domain-containing protein Sgpp (LOC103426888), partial mRNA
CS2_vs_CS1	gene.MD00G1191600	1.77862e-07	-3.00938	down	--	--	Molecular Function: triglyceride lipase activity (GO:0004806);; Biological Process: water transport (GO:0006833);; Molecular Function: phosphatidylcholine 1-acylhydrolase activity (GO:0008970);; Cellular Component: chloroplast (GO:0009507);; Biological Process: UV protection (GO:0009650);; Biological Process: response to salt stress (GO:0009651);; Biological Process: response to fructose (GO:0009…	--	Phospholipase A1-IIdelta GN=At2g42690 OS=Arabidopsis thaliana (Mouse-ear cress) PE=1 SV=1	Uncharacterized protein GN=PRUPE_ppa005547mg OS=Prunus persica (Peach) PE=4 SV=1	PREDICTED: phospholipase A1-IIdelta-like [Malus domestica]	PREDICTED: Malus x domestica phospholipase A1-IIdelta-like (LOC103411713), mRNA
CS2_vs_CS1	gene.MD00G1192400	1.66807e-13	-1.19666	down	[J]	Translation, ribosomal structure and biogenesis	--	--	Amidase 1 GN=F7G19.15 OS=Arabidopsis thaliana (Mouse-ear cress) PE=1 SV=1	Uncharacterized protein GN=PRUPE_ppa005982mg OS=Prunus persica (Peach) PE=4 SV=1	PREDICTED: amidase 1-like isoform X1 [Malus domestica]	PREDICTED: Malus x domestica amidase 1-like (LOC103412168), transcript variant X1, mRNA
CS2_vs_CS1	gene.MD00G1201600	9.13967e-53	1.12426	up	[L]	Replication, recombination and repair	Molecular Function: DNA photolyase activity (GO:0003913);; Molecular Function: protein kinase activity (GO:0004672);; Molecular Function: ATP binding (GO:0005524);; Cellular Component: nucleus (GO:0005634);; Cellular Component: cytoplasm (GO:0005737);; Biological Process: DNA repair (GO:0006281);; Biological Process: response to water deprivation (GO:0009414);; Biological Process: detection of li…	K12118|0.0|pop:POPTR_830225|hypothetical protein	Cryptochrome-1 OS=Arabidopsis thaliana (Mouse-ear cress) PE=1 SV=2	Uncharacterized protein GN=PRUPE_ppa002375mg OS=Prunus persica (Peach) PE=4 SV=1	PREDICTED: cryptochrome-1 isoform X1 [Malus domestica]	PREDICTED: Malus x domestica cryptochrome-1 (LOC103453329), transcript variant X1, mRNA
CS2_vs_CS1	gene.MD00G1221400	9.02453e-93	-2.67327	down	[Q]	Secondary metabolites biosynthesis, transport and catabolism	Molecular Function: iron ion binding (GO:0005506);; Molecular Function: electron carrier activity (GO:0009055);; Molecular Function: trans-cinnamate 4-monooxygenase activity (GO:0016710);; Molecular Function: heme binding (GO:0020037);; Biological Process: oxidation-reduction process (GO:0055114);;	K00487|0.0|pop:POPTR_823837|C4H2, CYP73A42	Trans-cinnamate 4-monooxygenase GN=CYP73A11 OS=Glycine max (Soybean) PE=2 SV=1	Cinnamic acid hydroxylase GN=C4H1 OS=Malus domestica (Apple) PE=2 SV=1	PREDICTED: trans-cinnamate 4-monooxygenase [Pyrus x bretschneideri]	PREDICTED: Pyrus x bretschneideri trans-cinnamate 4-monooxygenase (LOC103945990), mRNA
CS2_vs_CS1	gene.MD01G1000200	8.70134e-10	-1.64369	down	[E]	Amino acid transport and metabolism	Biological Process: amino acid transmembrane transport (GO:0003333);; Molecular Function: amino acid transmembrane transporter activity (GO:0015171);; Cellular Component: integral component of membrane (GO:0016021);;	--	Amino-acid permease BAT1 homolog GN=OsJ_02547 OS=Oryza sativa subsp. japonica (Rice) PE=2 SV=1	Uncharacterized protein GN=PRUPE_ppa004166mg OS=Prunus persica (Peach) PE=4 SV=1	PREDICTED: amino-acid permease BAT1 homolog [Malus domestica]	PREDICTED: Malus x domestica amino-acid permease BAT1 homolog (LOC103402119), mRNA
CS2_vs_CS1	gene.MD01G1007900	0.000302331	1.29196	up	[G]	Carbohydrate transport and metabolism	--	K05546|3e-133|pop:POPTR_1082413|hypothetical protein	Probable alpha-glucosidase Os06g0675700 (Precursor) OS=Oryza sativa subsp. japonica (Rice) PE=1 SV=1	Uncharacterized protein GN=PRUPE_ppa001032mg OS=Prunus persica (Peach) PE=4 SV=1	PREDICTED: probable glucan 1,3-alpha-glucosidase [Pyrus x bretschneideri]	PREDICTED: Malus x domestica probable glucan 1,3-alpha-glucosidase (LOC103455869), mRNA
CS2_vs_CS1	gene.MD01G1014300	9.72541e-30	1.44678	up	--	--	Cellular Component: Golgi membrane (GO:0000139);; Molecular Function: nucleotide-sugar transmembrane transporter activity (GO:0005338);; Cellular Component: plasma membrane (GO:0005886);; Biological Process: nucleotide-sugar transport (GO:0015780);; Cellular Component: integral component of membrane (GO:0016021);;	--	UDP-galactose transporter 2 GN=UDP-GALT2 OS=Arabidopsis thaliana (Mouse-ear cress) PE=2 SV=1	Uncharacterized protein GN=PRUPE_ppa008448mg OS=Prunus persica (Peach) PE=4 SV=1	PREDICTED: UDP-galactose transporter 2-like [Malus domestica]	PREDICTED: Malus x domestica UDP-galactose transporter 2-like (LOC103441767), mRNA
CS2_vs_CS1	gene.MD01G1021600	6.42083e-07	-1.10887	down	--	--	Molecular Function: transcription factor activity, sequence-specific DNA binding (GO:0003700);; Biological Process: regulation of transcription, DNA-templated (GO:0006355);; Molecular Function: sequence-specific DNA binding (GO:0043565);;	K14431|0.0|vvi:100249156|hypothetical protein LOC100249156	Transcription factor TGA4 GN=T31P16_20 OS=Arabidopsis thaliana (Mouse-ear cress) PE=1 SV=2	Uncharacterized protein GN=PRUPE_ppa007578mg OS=Prunus persica (Peach) PE=4 SV=1	PREDICTED: transcription factor TGA4-like isoform X4 [Malus domestica]	PREDICTED: Malus x domestica transcription factor TGA4-like (LOC103439342), transcript variant X5, mRNA
CS2_vs_CS1	gene.MD01G1028500	0.000416089	-1.21246	down	--	--	--	--	Xyloglucan galactosyltransferase KATAMARI1 GN=F11A3.8 OS=Arabidopsis thaliana (Mouse-ear cress) PE=1 SV=1	Uncharacterized protein GN=PRUPE_ppa004838mg OS=Prunus persica (Peach) PE=4 SV=1	PREDICTED: xyloglucan galactosyltransferase KATAMARI1-like [Pyrus x bretschneideri]	PREDICTED: Pyrus x bretschneideri xyloglucan galactosyltransferase KATAMARI1-like (LOC103932142), mRNA
CS2_vs_CS1	gene.MD01G1029000	8.86025e-11	-1.06718	down	--	--	--	--	--	Uncharacterized protein GN=PRUPE_ppa009210mg OS=Prunus persica (Peach) PE=4 SV=1	PREDICTED: uncharacterized protein LOC103432653 [Malus domestica]	PREDICTED: Malus x domestica uncharacterized LOC103432653 (LOC103432653), mRNA
CS2_vs_CS1	gene.MD01G1029100	6.14179e-107	1.95644	up	--	--	Molecular Function: calcium ion binding (GO:0005509);; Molecular Function: calcium-dependent phospholipid binding (GO:0005544);;	--	Annexin D2 GN=MXK3.27 OS=Arabidopsis thaliana (Mouse-ear cress) PE=2 SV=1	Uncharacterized protein GN=PRUPE_ppa008881mg OS=Prunus persica (Peach) PE=4 SV=1	PREDICTED: annexin D2-like [Pyrus x bretschneideri]	PREDICTED: Pyrus x bretschneideri annexin D2-like (LOC103931918), mRNA
CS2_vs_CS1	gene.MD01G1032200	3.24137e-61	1.00814	up	[RTKL]	--	--	--	Probable LRR receptor-like serine/threonine-protein kinase At5g10290 (Precursor) GN=At5g10290 OS=Arabidopsis thaliana (Mouse-ear cress) PE=1 SV=1	Uncharacterized protein GN=PRUPE_ppa003078mg OS=Prunus persica (Peach) PE=4 SV=1	PREDICTED: probable LRR receptor-like serine/threonine-protein kinase At5g10290 [Malus domestica]	PREDICTED: Malus x domestica probable LRR receptor-like serine/threonine-protein kinase At5g10290 (LOC103436599), transcript variant X5, mRNA
CS2_vs_CS1	gene.MD01G1032400	7.47319e-24	-2.24279	down	[R]	General function prediction only	Molecular Function: catalytic activity (GO:0003824);; Biological Process: metabolic process (GO:0008152);;	--	--	Uncharacterized protein GN=PRUPE_ppa008883mg OS=Prunus persica (Peach) PE=4 SV=1	PREDICTED: lipase 3-like [Malus domestica]	PREDICTED: Malus x domestica lipase 3-like (LOC103436598), mRNA
CS2_vs_CS1	gene.MD01G1035100	1.29387e-07	-1.3382	down	--	--	Molecular Function: catalytic activity (GO:0003824);; Biological Process: metabolic process (GO:0008152);;	--	--	Predicted protein GN=POPTRDRAFT_558500 OS=Populus trichocarpa (Western balsam poplar) PE=4 SV=1	PREDICTED: LOW QUALITY PROTEIN: lanC-like protein GCL1 [Malus domestica]	PREDICTED: Malus x domestica lanC-like protein GCL1 (LOC103421875), mRNA
CS2_vs_CS1	gene.MD01G1036200	6.30104e-125	-2.16928	down	[K]	Transcription	Molecular Function: transcription regulatory region sequence-specific DNA binding (GO:0000976);; Molecular Function: transcription factor activity, sequence-specific DNA binding (GO:0003700);; Cellular Component: nucleus (GO:0005634);; Biological Process: regulation of transcription, DNA-templated (GO:0006355);;	--	Homeobox-leucine zipper protein ATHB-6 GN=ATHB-6 OS=Arabidopsis thaliana (Mouse-ear cress) PE=1 SV=1	Uncharacterized protein GN=PRUPE_ppa008318mg OS=Prunus persica (Peach) PE=4 SV=1	PREDICTED: homeobox-leucine zipper protein ATHB-6-like isoform X1 [Malus domestica]	PREDICTED: Malus x domestica homeobox-leucine zipper protein ATHB-6-like (LOC103437499), transcript variant X1, mRNA
CS2_vs_CS1	gene.MD01G1038000	6.242e-06	1.73403	up	--	--	Biological Process: mitochondrial transport (GO:0006839);; Cellular Component: integral component of membrane (GO:0016021);; Cellular Component: mitochondrial membrane (GO:0031966);;	--	Mitochondrial uncoupling protein 5 GN=F14M13.10 OS=Arabidopsis thaliana (Mouse-ear cress) PE=2 SV=1	Uncharacterized protein GN=PRUPE_ppa008525mg OS=Prunus persica (Peach) PE=4 SV=1	PREDICTED: mitochondrial uncoupling protein 5-like [Malus domestica]	PREDICTED: Malus x domestica mitochondrial uncoupling protein 5-like (LOC103422930), mRNA
CS2_vs_CS1	gene.MD01G1040900	9.93336e-20	1.24636	up	--	--	--	--	--	Uncharacterized protein GN=PRUPE_ppa003035mg OS=Prunus persica (Peach) PE=4 SV=1	PREDICTED: uncharacterized protein LOC103455317 [Malus domestica]	PREDICTED: Malus x domestica uncharacterized LOC103455317 (LOC103455317), mRNA
CS2_vs_CS1	gene.MD01G1044100	1.39368e-26	-2.84514	down	[E]	Amino acid transport and metabolism	Molecular Function: glycine hydroxymethyltransferase activity (GO:0004372);; Biological Process: glycine metabolic process (GO:0006544);; Biological Process: L-serine metabolic process (GO:0006563);; Molecular Function: methyltransferase activity (GO:0008168);; Molecular Function: pyridoxal phosphate binding (GO:0030170);; Biological Process: methylation (GO:0032259);; Biological Process: tetrahy…	K00600|0.0|rcu:RCOM_0230740|serine hydroxymethyltransferase, putative (EC:2.1.2.1)	Serine hydroxymethyltransferase, mitochondrial (Precursor) OS=Solanum tuberosum (Potato) PE=2 SV=1	Uncharacterized protein GN=PRUPE_ppa004306mg OS=Prunus persica (Peach) PE=4 SV=1	PREDICTED: serine hydroxymethyltransferase, mitochondrial [Pyrus x bretschneideri]	PREDICTED: Pyrus x bretschneideri serine hydroxymethyltransferase, mitochondrial (LOC103937634), mRNA
CS2_vs_CS1	gene.MD01G1044700	0.00364285	1.2804	up	--	--	--	--	Uncharacterized protein At4g37920, chloroplastic (Precursor) GN=At4g37920 OS=Arabidopsis thaliana (Mouse-ear cress) PE=1 SV=2	Uncharacterized protein GN=PRUPE_ppa006103mg OS=Prunus persica (Peach) PE=4 SV=1	PREDICTED: uncharacterized protein At4g37920, chloroplastic-like [Malus domestica]	PREDICTED: Malus x domestica uncharacterized protein At4g37920, chloroplastic-like (LOC103417577), mRNA
CS2_vs_CS1	gene.MD01G1045200	2.88413e-42	-3.74602	down	--	--	--	--	--	--	--	PREDICTED: Malus x domestica uncharacterized LOC103448162 (LOC103448162), ncRNA
CS2_vs_CS1	gene.MD01G1045500	0.000520843	-1.32891	down	--	--	--	--	Transcription factor bHLH93 GN=K21L13.16 OS=Arabidopsis thaliana (Mouse-ear cress) PE=1 SV=1	Uncharacterized protein GN=PRUPE_ppa007656mg OS=Prunus persica (Peach) PE=4 SV=1	PREDICTED: transcription factor bHLH93 [Malus domestica]	PREDICTED: Malus x domestica transcription factor bHLH93 (LOC103448467), mRNA
CS2_vs_CS1	gene.MD01G1046700	1.2236e-65	-2.96287	down	[R]	General function prediction only	Molecular Function: zinc ion binding (GO:0008270);; Molecular Function: 2-alkenal reductase [NAD(P)] activity (GO:0032440);; Biological Process: oxidation-reduction process (GO:0055114);;	K07119|1e-173|vvi:100256090|hypothetical protein LOC100256090	2-alkenal reductase (NADP(+)-dependent) GN=DBR OS=Nicotiana tabacum (Common tobacco) PE=1 SV=1	Uncharacterized protein GN=PRUPE_ppa008058mg OS=Prunus persica (Peach) PE=4 SV=1	PREDICTED: 2-alkenal reductase (NADP(+)-dependent)-like [Prunus mume]	PREDICTED: Prunus mume 2-alkenal reductase (NADP(+)-dependent)-like (LOC103335605), mRNA
CS2_vs_CS1	gene.MD01G1048700	0.00136858	1.4645	up	--	--	--	--	--	Putative uncharacterized protein GN=MTR_8g032290 OS=Medicago truncatula (Barrel medic) PE=4 SV=1	PREDICTED: uncharacterized protein LOC103446040 [Malus domestica]	PREDICTED: Malus x domestica uncharacterized LOC103446040 (LOC103446040), mRNA
CS2_vs_CS1	gene.MD01G1051000	2.3393e-07	1.16895	up	--	--	--	--	Ribose-phosphate pyrophosphokinase 3, chloroplastic (Precursor) GN=PRS3 OS=Arabidopsis thaliana (Mouse-ear cress) PE=2 SV=1	Uncharacterized protein GN=PRUPE_ppa006599mg OS=Prunus persica (Peach) PE=4 SV=1	PREDICTED: ribose-phosphate pyrophosphokinase 4-like [Malus domestica]	PREDICTED: Pyrus x bretschneideri ribose-phosphate pyrophosphokinase 4 (LOC103949804), mRNA
CS2_vs_CS1	gene.MD01G1051900	0	2.66713	up	[QR]	--	Molecular Function: O-methyltransferase activity (GO:0008171);; Biological Process: methylation (GO:0032259);; Molecular Function: protein dimerization activity (GO:0046983);;	--	Trans-resveratrol di-O-methyltransferase GN=ROMT OS=Vitis vinifera (Grape) PE=1 SV=2	O-methyltransferase OS=Pyrus pyrifolia (Chinese pear) PE=2 SV=1	O-methyltransferase 1 [Malus domestica]	Malus domestica O-methyltransferase 1 (OMT1) mRNA, OMT1-b allele, complete cds
CS2_vs_CS1	gene.MD01G1052100	8.29961e-09	-1.0577	down	--	--	--	--	--	Uncharacterized protein GN=PRUPE_ppa008726mg OS=Prunus persica (Peach) PE=4 SV=1	PREDICTED: uncharacterized protein LOC103935482 [Pyrus x bretschneideri]	PREDICTED: Pyrus x bretschneideri uncharacterized LOC103935558 (LOC103935558), mRNA
CS2_vs_CS1	gene.MD01G1054900	1.34313e-84	1.00032	up	--	--	--	--	Remorin OS=Solanum tuberosum (Potato) PE=1 SV=1	Remorin OS=Pyrus x bretschneideri PE=2 SV=1	remorin [Pyrus x bretschneideri]	PREDICTED: Malus x domestica remorin-like (LOC103417594), mRNA
CS2_vs_CS1	gene.MD01G1056200	8.83309e-29	2.07501	up	--	--	Molecular Function: DNA binding (GO:0003677);;	--	--	Uncharacterized protein GN=PRUPE_ppa008388mg OS=Prunus persica (Peach) PE=4 SV=1	PREDICTED: uncharacterized protein LOC103934477 [Pyrus x bretschneideri]	PREDICTED: Pyrus x bretschneideri uncharacterized LOC103934477 (LOC103934477), transcript variant X2, mRNA
CS2_vs_CS1	gene.MD01G1061000	0.00488074	-1.27519	down	--	--	--	--	Protein PAIR1 GN=OSJNBa0009C08.13 OS=Oryza sativa subsp. japonica (Rice) PE=2 SV=1	Uncharacterized protein GN=PRUPE_ppa022812mg OS=Prunus persica (Peach) PE=4 SV=1	PREDICTED: protein PAIR1-like [Pyrus x bretschneideri]	PREDICTED: Pyrus x bretschneideri protein PAIR1-like (LOC103957449), mRNA
CS2_vs_CS1	gene.MD01G1068300	4.04308e-61	-1.06096	down	--	--	--	--	Probable receptor-like protein kinase At5g24010 (Precursor) GN=At5g24010 OS=Arabidopsis thaliana (Mouse-ear cress) PE=1 SV=1	Uncharacterized protein OS=Glycine max (Soybean) PE=4 SV=1	PREDICTED: uncharacterized protein LOC103957435 [Pyrus x bretschneideri]	PREDICTED: Pyrus x bretschneideri uncharacterized LOC103957435 (LOC103957435), mRNA
CS2_vs_CS1	gene.MD01G1068700	0.00140337	-1.10786	down	--	--	Molecular Function: transferase activity (GO:0016740);;	--	Putative UDP-rhamnose:rhamnosyltransferase 1 GN=GT4 OS=Fragaria ananassa (Strawberry) PE=2 SV=1	Uncharacterized protein GN=PRUPE_ppa025376mg OS=Prunus persica (Peach) PE=4 SV=1	PREDICTED: putative UDP-rhamnose:rhamnosyltransferase 1 [Malus domestica]	PREDICTED: Malus x domestica putative UDP-rhamnose:rhamnosyltransferase 1 (LOC103409460), mRNA
CS2_vs_CS1	gene.MD01G1068900	9.79032e-08	-2.09723	down	[M]	Cell wall/membrane/envelope biogenesis	Molecular Function: polygalacturonase activity (GO:0004650);; Cellular Component: extracellular region (GO:0005576);; Biological Process: carbohydrate metabolic process (GO:0005975);;	--	Probable polygalacturonase OS=Vitis vinifera (Grape) PE=1 SV=1	Polygalacturonase-like protein OS=Fragaria ananassa (Strawberry) PE=2 SV=1	PREDICTED: probable polygalacturonase [Malus domestica]	PREDICTED: Malus x domestica probable polygalacturonase (LOC103417619), mRNA
CS2_vs_CS1	gene.MD01G1070300	7.50673e-90	-1.44445	down	--	--	Biological Process: metal ion transport (GO:0030001);; Molecular Function: metal ion binding (GO:0046872);;	--	--	Uncharacterized protein OS=Lotus japonicus (Lotus corniculatus var. japonicus) PE=2 SV=1	PREDICTED: FK506-binding protein 4-like [Malus domestica]	PREDICTED: Malus x domestica FK506-binding protein 4-like (LOC103408141), mRNA
CS2_vs_CS1	gene.MD01G1073000	3.26315e-195	1.94752	up	--	--	--	--	Delta(8)-fatty-acid desaturase GN=sld1 OS=Borago officinalis (Bourrache) PE=1 SV=1	Uncharacterized protein GN=PRUPE_ppa024455mg OS=Prunus persica (Peach) PE=4 SV=1	PREDICTED: delta(8)-fatty-acid desaturase 1-like [Malus domestica]	PREDICTED: Malus x domestica delta(8)-fatty-acid desaturase 1-like (LOC103407203), mRNA
CS2_vs_CS1	gene.MD01G1074000	2.50088e-18	1.59185	up	--	--	--	--	Uncharacterized protein At5g41620 GN=At5g41620 OS=Arabidopsis thaliana (Mouse-ear cress) PE=1 SV=2	Uncharacterized protein GN=PRUPE_ppa021923mg OS=Prunus persica (Peach) PE=4 SV=1	PREDICTED: uncharacterized protein At5g41620 [Malus domestica]	PREDICTED: Malus x domestica uncharacterized protein At5g41620 (LOC103426539), mRNA
CS2_vs_CS1	gene.MD01G1075000	0.00022895	1.4475	up	--	--	--	--	--	Uncharacterized protein GN=PRUPE_ppa018680mg OS=Prunus persica (Peach) PE=4 SV=1	PREDICTED: uncharacterized protein LOC103411921 [Malus domestica]	PREDICTED: Malus x domestica uncharacterized LOC103406221 (LOC103406221), mRNA
CS2_vs_CS1	gene.MD01G1077200	0.00711057	1.03838	up	--	--	Biological Process: response to toxic substance (GO:0009636);; Biological Process: response to salt stress (GO:0009651);; Biological Process: xenobiotic catabolic process (GO:0042178);; Molecular Function: quercetin 3-O-glucosyltransferase activity (GO:0080043);;	K08237|0.0|pop:POPTR_731288|hypothetical protein	Hydroquinone glucosyltransferase GN=AS OS=Rauvolfia serpentina (Serpentwood) PE=1 SV=1	Predicted protein GN=POPTRDRAFT_731288 OS=Populus trichocarpa (Western balsam poplar) PE=3 SV=1	PREDICTED: hydroquinone glucosyltransferase [Malus domestica]	PREDICTED: Malus x domestica hydroquinone glucosyltransferase (LOC103413421), mRNA
CS2_vs_CS1	gene.MD01G1079900	1.28461e-12	-1.06945	down	--	--	Biological Process: autophagosome assembly (GO:0000045);; Cellular Component: pre-autophagosomal structure (GO:0000407);; Biological Process: protein targeting to vacuole (GO:0006623);; Biological Process: pollen germination (GO:0009846);;	K08334|0.0|vvi:100232897|ATG6	Beclin-1-like protein GN=At3g61710 OS=Arabidopsis thaliana (Mouse-ear cress) PE=2 SV=2	Beclin 1 protein GN=atg6 OS=Malus domestica (Apple) PE=2 SV=1	PREDICTED: beclin-1-like protein [Malus domestica]	PREDICTED: Malus x domestica beclin-1-like protein (LOC103417629), mRNA
CS2_vs_CS1	gene.MD01G1082200	9.12342e-05	1.03064	up	--	--	Molecular Function: aspartic-type endopeptidase activity (GO:0004190);; Biological Process: proteolysis (GO:0006508);;	--	Protein ASPARTIC PROTEASE IN GUARD CELL 1 (Precursor) GN=ASPG1 OS=Arabidopsis thaliana (Mouse-ear cress) PE=1 SV=1	Uncharacterized protein GN=PRUPE_ppa005289mg OS=Prunus persica (Peach) PE=4 SV=1	PREDICTED: aspartyl protease family protein 2-like [Malus domestica]	PREDICTED: Malus x domestica aspartyl protease family protein 2-like (LOC103406209), mRNA
CS2_vs_CS1	gene.MD01G1082700	3.03973e-14	1.26168	up	--	--	Molecular Function: protein dimerization activity (GO:0046983);;	--	Transcription factor bHLH13 GN=F6F3.7 OS=Arabidopsis thaliana (Mouse-ear cress) PE=2 SV=1	Uncharacterized protein GN=PRUPE_ppa002985mg OS=Prunus persica (Peach) PE=4 SV=1	PREDICTED: transcription factor bHLH13-like [Malus domestica]	PREDICTED: Malus x domestica transcription factor bHLH13-like (LOC103415544), mRNA
CS2_vs_CS1	gene.MD01G1087300	2.65663e-13	1.75496	up	[RTKL]	--	Molecular Function: protein serine/threonine kinase activity (GO:0004674);; Molecular Function: ATP binding (GO:0005524);; Cellular Component: cytoplasm (GO:0005737);; Biological Process: protein phosphorylation (GO:0006468);; Biological Process: signal transduction (GO:0007165);; Biological Process: regulation of potassium ion transport (GO:0043266);; Biological Process: cellular response to pot…	--	CBL-interacting serine/threonine-protein kinase 9 OS=Arabidopsis thaliana (Mouse-ear cress) PE=1 SV=2	Uncharacterized protein GN=PRUPE_ppa005700mg OS=Prunus persica (Peach) PE=4 SV=1	PREDICTED: CBL-interacting serine/threonine-protein kinase 9-like [Malus domestica]	PREDICTED: Malus x domestica CBL-interacting serine/threonine-protein kinase 9-like (LOC103433849), mRNA
CS2_vs_CS1	gene.MD01G1087400	8.67417e-09	1.83351	up	--	--	Biological Process: fatty acid biosynthetic process (GO:0006633);; Cellular Component: membrane (GO:0016020);; Molecular Function: transferase activity, transferring acyl groups other than amino-acyl groups (GO:0016747);;	--	3-ketoacyl-CoA synthase 1 GN=T25K16.11 OS=Arabidopsis thaliana (Mouse-ear cress) PE=2 SV=1	Uncharacterized protein GN=PRUPE_ppa003977mg OS=Prunus persica (Peach) PE=4 SV=1	PREDICTED: 3-ketoacyl-CoA synthase 1-like [Malus domestica]	PREDICTED: Malus x domestica 3-ketoacyl-CoA synthase 1-like (LOC103427677), mRNA
CS2_vs_CS1	gene.MD01G1087900	1.30894e-18	1.02865	up	--	--	--	--	Protein IQ-DOMAIN 1 GN=IQD1 OS=Arabidopsis thaliana (Mouse-ear cress) PE=1 SV=1	Uncharacterized protein GN=PRUPE_ppa004080mg OS=Prunus persica (Peach) PE=4 SV=1	PREDICTED: protein IQ-DOMAIN 1-like isoform X2 [Malus domestica]	PREDICTED: Malus x domestica protein IQ-DOMAIN 1-like (LOC103413776), transcript variant X2, mRNA
CS2_vs_CS1	gene.MD01G1088900	2.2268e-85	1.04981	up	[T]	Signal transduction mechanisms	Biological Process: regulation of cellular process (GO:0050794);;	--	Two-component response regulator-like PRR95 OS=Oryza sativa subsp. japonica (Rice) PE=2 SV=1	Pseudo-response regulator 9 GN=PRR9 OS=Castanea sativa (Sweet chestnut) PE=2 SV=1	PREDICTED: LOW QUALITY PROTEIN: two-component response regulator-like PRR95 [Malus domestica]	PREDICTED: Malus x domestica two-component response regulator-like PRR95 (LOC103403589), mRNA
CS2_vs_CS1	gene.MD01G1089600	9.80742e-44	1.38935	up	[QR]	--	Molecular Function: O-methyltransferase activity (GO:0008171);; Biological Process: methylation (GO:0032259);; Molecular Function: protein dimerization activity (GO:0046983);;	--	Caffeic acid 3-O-methyltransferase 1 GN=HOMT1 OS=Populus kitakamiensis (Aspen) PE=3 SV=1	Uncharacterized protein GN=PRUPE_ppa007229mg OS=Prunus persica (Peach) PE=4 SV=1	O-methyltransferase 2 [Malus domestica]	PREDICTED: Malus x domestica caffeic acid 3-O-methyltransferase 1-like (LOC103421923), mRNA
CS2_vs_CS1	gene.MD01G1089800	2.20897e-08	1.41862	up	[QR]	--	Molecular Function: O-methyltransferase activity (GO:0008171);; Biological Process: methylation (GO:0032259);; Molecular Function: protein dimerization activity (GO:0046983);;	--	Anthranilate N-methyltransferase OS=Ruta graveolens (Common rue) PE=1 SV=1	Uncharacterized protein GN=PRUPE_ppa019437mg OS=Prunus persica (Peach) PE=4 SV=1	PREDICTED: caffeic acid 3-O-methyltransferase-like [Malus domestica]	PREDICTED: Malus x domestica caffeic acid 3-O-methyltransferase-like (LOC103439452), mRNA
CS2_vs_CS1	gene.MD01G1091000	7.36584e-28	1.42604	up	[RTKL]	--	Molecular Function: nucleotide binding (GO:0000166);; Molecular Function: protein kinase activity (GO:0004672);;	--	CBL-interacting serine/threonine-protein kinase 11 GN=At2g30360 OS=Arabidopsis thaliana (Mouse-ear cress) PE=1 SV=1	Uncharacterized protein GN=PRUPE_ppa002240mg OS=Prunus persica (Peach) PE=4 SV=1	PREDICTED: serine/threonine-protein kinase ATG1a-like isoform X2 [Malus domestica]	PREDICTED: Malus x domestica serine/threonine-protein kinase ATG1a-like (LOC103422268), transcript variant X3, mRNA
CS2_vs_CS1	gene.MD01G1092000	8.06495e-35	2.99583	up	--	--	--	--	--	--	PREDICTED: uncharacterized protein LOC103423525 [Malus domestica]	PREDICTED: Malus x domestica uncharacterized LOC103422616 (LOC103422616), ncRNA
CS2_vs_CS1	gene.MD01G1092900	9.82908e-05	1.54277	up	--	--	--	--	NAC domain-containing protein 74 OS=Oryza sativa subsp. japonica (Rice) PE=2 SV=1	Uncharacterized protein GN=PRUPE_ppa019865mg OS=Prunus persica (Peach) PE=4 SV=1	PREDICTED: NAC domain-containing protein 83-like [Malus domestica]	PREDICTED: Malus x domestica NAC domain-containing protein 83-like (LOC103417663), mRNA
CS2_vs_CS1	gene.MD01G1093700	1.6695e-59	4.08894	up	--	--	--	--	Protein FEZ GN=T2P11.6 OS=Arabidopsis thaliana (Mouse-ear cress) PE=2 SV=1	Uncharacterized protein GN=PRUPE_ppa019865mg OS=Prunus persica (Peach) PE=4 SV=1	PREDICTED: protein NTM1-like 9 [Malus domestica]	PREDICTED: Malus x domestica protein NTM1-like 9 (LOC103410856), mRNA
CS2_vs_CS1	gene.MD01G1100200	3.57208e-15	2.29086	up	--	--	--	--	--	Uncharacterized protein GN=PRUPE_ppa010332mg OS=Prunus persica (Peach) PE=4 SV=1	PREDICTED: uncharacterized protein LOC103439483 [Malus domestica]	PREDICTED: Malus x domestica uncharacterized LOC103439483 (LOC103439483), mRNA
CS2_vs_CS1	gene.MD01G1100800	7.4967e-29	1.01091	up	--	--	Biological Process: regulation of transcription from RNA polymerase II promoter (GO:0006357);; Biological Process: regulation of DNA-templated transcription, elongation (GO:0032784);;	--	Putative transcription elongation factor SPT5 homolog 1 GN=At4g08350 OS=Arabidopsis thaliana (Mouse-ear cress) PE=1 SV=2	Uncharacterized protein GN=PRUPE_ppa000178mg OS=Prunus persica (Peach) PE=4 SV=1	PREDICTED: transcription elongation factor SPT5-like isoform X1 [Pyrus x bretschneideri]	PREDICTED: Pyrus x bretschneideri transcription elongation factor SPT5-like (LOC103958442), transcript variant X6, mRNA
CS2_vs_CS1	gene.MD01G1102700	0.000453112	1.8725	up	--	--	Biological Process: pollen development (GO:0009555);;	--	--	Putative uncharacterized protein GN=VIT_13s0019g04870 OS=Vitis vinifera (Grape) PE=4 SV=1	PREDICTED: uncharacterized protein LOC103427317 [Malus domestica]	PREDICTED: Malus x domestica uncharacterized LOC103427317 (LOC103427317), mRNA
CS2_vs_CS1	gene.MD01G1105900	3.40386e-06	1.30735	up	--	--	--	--	--	Uncharacterized protein GN=PRUPE_ppa000488mg OS=Prunus persica (Peach) PE=4 SV=1	PREDICTED: LOW QUALITY PROTEIN: uncharacterized protein LOC103430084 [Malus domestica]	PREDICTED: Malus x domestica uncharacterized LOC103430084 (LOC103430084), mRNA
CS2_vs_CS1	gene.MD01G1106900	2.82569e-22	-1.38575	down	[E]	Amino acid transport and metabolism	Cellular Component: cytoplasm (GO:0005737);; Biological Process: L-phenylalanine catabolic process (GO:0006559);; Biological Process: cinnamic acid biosynthetic process (GO:0009800);; Molecular Function: phenylalanine ammonia-lyase activity (GO:0045548);;	K10775|0.0|rcu:RCOM_0262230|Phenylalanine ammonia-lyase, putative (EC:4.3.1.24)	Phenylalanine ammonia-lyase 1 GN=PAL1 OS=Rubus idaeus (Raspberry) PE=2 SV=1	Phenylalanine ammonia-lyase OS=Pyrus x bretschneideri PE=2 SV=1	PREDICTED: phenylalanine ammonia-lyase 1 [Malus domestica]	PREDICTED: Malus x domestica phenylalanine ammonia-lyase 1 (LOC103430265), mRNA
CS2_vs_CS1	gene.MD01G1110400	1.22077e-13	-1.41937	down	[O]	Posttranslational modification, protein turnover, chaperones	Molecular Function: acid-amino acid ligase activity (GO:0016881);;	--	Ubiquitin-conjugating enzyme E2 19 GN=UBC19 OS=Arabidopsis thaliana (Mouse-ear cress) PE=1 SV=1	Uncharacterized protein GN=PRUPE_ppa011925mg OS=Prunus persica (Peach) PE=4 SV=1	PREDICTED: probable ubiquitin-conjugating enzyme E2 C isoform X1 [Malus domestica]	PREDICTED: Malus x domestica probable ubiquitin-conjugating enzyme E2 C (LOC103432391), transcript variant X1, mRNA
CS2_vs_CS1	gene.MD01G1113300	3.16439e-12	-1.38487	down	--	--	Cellular Component: mitochondrion (GO:0005739);;	--	--	Putative uncharacterized protein GN=VIT_13s0019g03560 OS=Vitis vinifera (Grape) PE=4 SV=1	PREDICTED: uncharacterized protein LOC103433042 [Malus domestica]	PREDICTED: Malus x domestica uncharacterized LOC103433042 (LOC103433042), mRNA
CS2_vs_CS1	gene.MD01G1114400	3.88956e-34	1.57548	up	[T]	Signal transduction mechanisms	--	K12129|0.0|pop:POPTR_563807|PtpRR7	Two-component response regulator-like APRR7 GN=APRR7 OS=Arabidopsis thaliana (Mouse-ear cress) PE=2 SV=1	Pseudo response regulator GN=PtpRR7 OS=Populus trichocarpa (Western balsam poplar) PE=4 SV=1	PREDICTED: LOW QUALITY PROTEIN: two-component response regulator-like APRR3 [Malus domestica]	PREDICTED: Malus x domestica two-component response regulator-like APRR3 (LOC103417716), mRNA
CS2_vs_CS1	gene.MD01G1115000	9.09891e-31	-1.33475	down	[O]	Posttranslational modification, protein turnover, chaperones	Biological Process: toxin catabolic process (GO:0009407);; Cellular Component: chloroplast stroma (GO:0009570);; Biological Process: response to cyclopentenone (GO:0010583);; Biological Process: protein glutathionylation (GO:0010731);;	K00799|1e-138|vvi:100267329|hypothetical protein LOC100267329	Protein IN2-1 homolog B GN=GSTZ5 OS=Oryza sativa subsp. japonica (Rice) PE=2 SV=1	Uncharacterized protein GN=PRUPE_ppa009087mg OS=Prunus persica (Peach) PE=4 SV=1	PREDICTED: protein IN2-1 homolog B-like [Malus domestica]	PREDICTED: Malus x domestica protein IN2-1 homolog B-like (LOC103433281), mRNA
CS2_vs_CS1	gene.MD01G1117800	2.92555e-09	2.59393	up	--	--	Biological Process: flavonoid biosynthetic process (GO:0009813);; Molecular Function: chalcone isomerase activity (GO:0045430);;	K01859|7e-117|vvi:100233078|CHI, CHI1, CHI2	Chalcone--flavonone isomerase GN=CHI OS=Pyrus communis (Pear) PE=2 SV=1	Putative uncharacterized protein OS=Picea sitchensis (Sitka spruce) PE=2 SV=1	PREDICTED: chalcone--flavonone isomerase-like isoform X2 [Malus domestica]	PREDICTED: Malus x domestica chalcone--flavonone isomerase-like (LOC103433655), transcript variant X2, mRNA
CS2_vs_CS1	gene.MD01G1120400	0	-5.37496	down	--	--	--	--	--	Uncharacterized protein GN=PRUPE_ppa013960mg OS=Prunus persica (Peach) PE=4 SV=1	PREDICTED: uncharacterized protein LOC103426379 [Malus domestica]	PREDICTED: Malus x domestica uncharacterized LOC103426379 (LOC103426379), mRNA
CS2_vs_CS1	gene.MD01G1124300	1.03116e-19	1.0176	up	--	--	Molecular Function: metal ion binding (GO:0046872);;	K09250|3e-126|vvi:100251241|hypothetical protein LOC100251241	Cold shock protein 1 GN=T19K4.150 OS=Arabidopsis thaliana (Mouse-ear cress) PE=2 SV=1	Putative uncharacterized protein GN=VIT_13s0019g00720 OS=Vitis vinifera (Grape) PE=4 SV=1	PREDICTED: zinc finger protein GIS2-like isoform X2 [Malus domestica]	PREDICTED: Malus x domestica zinc finger protein GIS2-like (LOC103406328), transcript variant X3, mRNA
CS2_vs_CS1	gene.MD01G1124500	3.29232e-19	-1.78731	down	--	--	--	--	--	Uncharacterized protein GN=PRUPE_ppa006240mg OS=Prunus persica (Peach) PE=4 SV=1	PREDICTED: uncharacterized protein LOC103930033 isoform X3 [Pyrus x bretschneideri]	PREDICTED: Malus x domestica ACT domain-containing protein ACR9-like (LOC103406326), mRNA
CS2_vs_CS1	gene.MD01G1125200	1.68789e-72	-1.90412	down	[MG]	--	Cellular Component: plasma membrane (GO:0005886);; Biological Process: D-xylose metabolic process (GO:0042732);; Biological Process: cellular metabolic process (GO:0044237);; Molecular Function: UDP-glucuronate decarboxylase activity (GO:0048040);; Molecular Function: coenzyme binding (GO:0050662);;	--	UDP-glucuronic acid decarboxylase 5 GN=UXS5 OS=Arabidopsis thaliana (Mouse-ear cress) PE=2 SV=1	Uncharacterized protein GN=PRUPE_ppa008154mg OS=Prunus persica (Peach) PE=4 SV=1	PREDICTED: UDP-glucuronic acid decarboxylase 5 [Malus domestica]	PREDICTED: Malus x domestica UDP-glucuronic acid decarboxylase 5 (LOC103417739), transcript variant X3, mRNA
CS2_vs_CS1	gene.MD01G1133700	2.6601e-31	-1.68209	down	[Z]	Cytoskeleton	Molecular Function: ATP binding (GO:0005524);; Cellular Component: cell wall (GO:0005618);; Cellular Component: nucleus (GO:0005634);; Cellular Component: cytoplasm (GO:0005737);; Cellular Component: cytoskeleton (GO:0005856);; Cellular Component: plasma membrane (GO:0005886);; Biological Process: root hair elongation (GO:0048767);;	K05692|0.0|rcu:RCOM_0503940|actin, putative	Actin-1 OS=Oryza sativa subsp. japonica (Rice) PE=2 SV=1	Uncharacterized protein GN=PRUPE_ppa007236mg OS=Prunus persica (Peach) PE=4 SV=1	PREDICTED: actin-1 [Malus domestica]	PREDICTED: Malus x domestica actin-1 (LOC103417736), transcript variant X2, mRNA
CS2_vs_CS1	gene.MD01G1136700	4.18649e-07	-1.10393	down	--	--	--	--	E3 ubiquitin-protein ligase RING1 GN=RING1 OS=Gossypium hirsutum (Upland cotton) PE=2 SV=1	Uncharacterized protein GN=PRUPE_ppa006881mg OS=Prunus persica (Peach) PE=4 SV=1	PREDICTED: probable E3 ubiquitin-protein ligase RHC2A [Malus domestica]	PREDICTED: Malus x domestica probable E3 ubiquitin-protein ligase RHC2A (LOC103406316), mRNA
CS2_vs_CS1	gene.MD01G1137300	4.24723e-175	1.43711	up	[RTKL]	--	Molecular Function: protein serine/threonine kinase activity (GO:0004674);; Molecular Function: ATP binding (GO:0005524);; Biological Process: protein phosphorylation (GO:0006468);; Molecular Function: carbohydrate binding (GO:0030246);;	--	L-type lectin-domain containing receptor kinase S.4 (Precursor) GN=LECRKS4 OS=Arabidopsis thaliana (Mouse-ear cress) PE=1 SV=1	Uncharacterized protein GN=PRUPE_ppa002277mg OS=Prunus persica (Peach) PE=4 SV=1	PREDICTED: L-type lectin-domain containing receptor kinase S.4-like [Malus domestica]	PREDICTED: Malus x domestica L-type lectin-domain containing receptor kinase S.4-like (LOC103433896), mRNA
CS2_vs_CS1	gene.MD01G1137400	6.70596e-12	2.30654	up	[RTKL]	--	Molecular Function: protein serine/threonine kinase activity (GO:0004674);; Molecular Function: ATP binding (GO:0005524);; Biological Process: protein phosphorylation (GO:0006468);; Molecular Function: carbohydrate binding (GO:0030246);;	--	L-type lectin-domain containing receptor kinase S.4 (Precursor) GN=LECRKS4 OS=Arabidopsis thaliana (Mouse-ear cress) PE=1 SV=1	Uncharacterized protein GN=PRUPE_ppa002277mg OS=Prunus persica (Peach) PE=4 SV=1	PREDICTED: L-type lectin-domain containing receptor kinase S.4-like [Malus domestica]	PREDICTED: Malus x domestica L-type lectin-domain containing receptor kinase S.4-like (LOC103433913), mRNA
CS2_vs_CS1	gene.MD01G1137900	2.87727e-12	-2.09415	down	--	--	Molecular Function: ATP binding (GO:0005524);; Cellular Component: chloroplast stroma (GO:0009570);;	--	Ribulose bisphosphate carboxylase/oxygenase activase, chloroplastic (Precursor) GN=RCA OS=Malus domestica (Apple) PE=2 SV=1	Uncharacterized protein GN=PRUPE_ppa005158mg OS=Prunus persica (Peach) PE=4 SV=1	PREDICTED: ribulose bisphosphate carboxylase/oxygenase activase, chloroplastic isoform X1 [Pyrus x bretschneideri]	PREDICTED: Pyrus x bretschneideri ribulose bisphosphate carboxylase/oxygenase activase, chloroplastic (LOC103935705), transcript variant X1, mRNA
CS2_vs_CS1	gene.MD01G1139800	8.48091e-30	1.74441	up	[RTKL]	--	Molecular Function: protein serine/threonine kinase activity (GO:0004674);; Molecular Function: ATP binding (GO:0005524);; Biological Process: protein phosphorylation (GO:0006468);; Molecular Function: polysaccharide binding (GO:0030247);;	--	Wall-associated receptor kinase-like 20 (Precursor) GN=WAKL20 OS=Arabidopsis thaliana (Mouse-ear cress) PE=2 SV=1	Uncharacterized protein GN=PRUPE_ppa002973mg OS=Prunus persica (Peach) PE=4 SV=1	PREDICTED: wall-associated receptor kinase-like 20 [Pyrus x bretschneideri]	PREDICTED: Pyrus x bretschneideri wall-associated receptor kinase-like 20 (LOC103935831), mRNA
CS2_vs_CS1	gene.MD01G1140100	7.59354e-10	-1.17096	down	--	--	--	--	Uncharacterized protein At2g39795, mitochondrial (Precursor) GN=At2g39795 OS=Arabidopsis thaliana (Mouse-ear cress) PE=1 SV=1	Uncharacterized protein GN=PRUPE_ppa010341mg OS=Prunus persica (Peach) PE=4 SV=1	PREDICTED: uncharacterized protein At2g39795, mitochondrial-like [Pyrus x bretschneideri]	PREDICTED: Pyrus x bretschneideri uncharacterized protein At2g39795, mitochondrial-like (LOC103935862), mRNA
CS2_vs_CS1	gene.MD01G1141300	0.000180036	1.39759	up	--	--	--	--	Protein DA1-related 2 GN=DAR2 OS=Arabidopsis thaliana (Mouse-ear cress) PE=2 SV=1	Uncharacterized protein GN=PRUPE_ppa004412mg OS=Prunus persica (Peach) PE=4 SV=1	PREDICTED: protein DA1-related 2 isoform X1 [Malus domestica]	PREDICTED: Malus x domestica protein DA1-related 2 (LOC103435518), transcript variant X1, mRNA
CS2_vs_CS1	gene.MD01G1141800	3.16434e-06	2.38839	up	--	--	Biological Process: phosphatidylinositol biosynthetic process (GO:0006661);; Biological Process: embryo development ending in seed dormancy (GO:0009793);;	--	--	Uncharacterized protein GN=PRUPE_ppa012257mg OS=Prunus persica (Peach) PE=4 SV=1	PREDICTED: uncharacterized protein LOC103435586 [Malus domestica]	PREDICTED: Malus x domestica uncharacterized LOC103435586 (LOC103435586), mRNA
CS2_vs_CS1	gene.MD01G1142200	1.03598e-36	-1.08541	down	--	--	--	--	--	Uncharacterized protein GN=PRUPE_ppa006379mg OS=Prunus persica (Peach) PE=4 SV=1	PREDICTED: uncharacterized protein LOC103435629 [Malus domestica]	PREDICTED: Malus x domestica uncharacterized LOC103435629 (LOC103435629), mRNA
CS2_vs_CS1	gene.MD01G1153300	2.59672e-42	-1.14101	down	[RTKL]	--	--	--	Serine/threonine-protein kinase AFC1 GN=F4P12_270 OS=Arabidopsis thaliana (Mouse-ear cress) PE=2 SV=2	Uncharacterized protein GN=PRUPE_ppa015349mg OS=Prunus persica (Peach) PE=4 SV=1	PREDICTED: dual specificity tyrosine-phosphorylation-regulated kinase mbk-2-like isoform X2 [Malus domestica]	PREDICTED: Malus x domestica dual specificity tyrosine-phosphorylation-regulated kinase mbk-2-like (LOC103437351), transcript variant X2, mRNA
CS2_vs_CS1	gene.MD01G1153400	0	-2.98328	down	[O]	Posttranslational modification, protein turnover, chaperones	--	--	Chaperone protein ClpC2, chloroplastic (Precursor) GN=CLPC2 OS=Oryza sativa subsp. japonica (Rice) PE=2 SV=2	Uncharacterized protein GN=PRUPE_ppa000558mg OS=Prunus persica (Peach) PE=4 SV=1	PREDICTED: protein SMAX1-LIKE 7-like [Malus domestica]	PREDICTED: Malus x domestica protein SMAX1-LIKE 7-like (LOC103437379), mRNA
CS2_vs_CS1	gene.MD01G1153500	1.2776e-11	1.64027	up	--	--	Biological Process: regulation of transcription, DNA-templated (GO:0006355);; Molecular Function: zinc ion binding (GO:0008270);; Molecular Function: histone binding (GO:0042393);;	--	PHD finger protein ALFIN-LIKE 1 GN=AL1 OS=Arabidopsis thaliana (Mouse-ear cress) PE=1 SV=1	ALF domain class transcription factor GN=ALF5 OS=Malus domestica (Apple) PE=2 SV=1	PHD finger protein ALFIN-LIKE 2-like [Malus domestica]	PREDICTED: Malus x domestica PHD finger protein ALFIN-LIKE 2-like (ALF5), transcript variant X1, mRNA
CS2_vs_CS1	gene.MD01G1153600	5.36042e-113	1.97236	up	[R]	General function prediction only	Molecular Function: iron ion binding (GO:0005506);; Molecular Function: oxidoreductase activity, acting on paired donors, with incorporation or reduction of molecular oxygen, 2-oxoglutarate as one donor, and incorporation of one atom each of oxygen into both donors (GO:0016706);; Biological Process: oxidation-reduction process (GO:0055114);; Biological Process: response to karrikin (GO:0080167);;	--	Probable 2-oxoglutarate/Fe(II)-dependent dioxygenase GN=DIOX2 OS=Papaver somniferum (Opium poppy) PE=2 SV=1	Uncharacterized protein GN=PRUPE_ppa007719mg OS=Prunus persica (Peach) PE=4 SV=1	PREDICTED: flavonol synthase/flavanone 3-hydroxylase-like [Malus domestica]	PREDICTED: Malus x domestica flavonol synthase/flavanone 3-hydroxylase-like (LOC103406417), mRNA
CS2_vs_CS1	gene.MD01G1159800	9.2675e-29	-1.87588	down	--	--	--	--	--	Uncharacterized protein GN=PRUPE_ppa004684mg OS=Prunus persica (Peach) PE=4 SV=1	PREDICTED: uncharacterized protein LOC103437659 [Malus domestica]	PREDICTED: Malus x domestica uncharacterized LOC103437659 (LOC103437659), mRNA
CS2_vs_CS1	gene.MD01G1161300	1.35373e-07	3.80091	up	--	--	Cellular Component: integral component of membrane (GO:0016021);;	--	--	Uncharacterized protein GN=PRUPE_ppa005957mg OS=Prunus persica (Peach) PE=4 SV=1	PREDICTED: probable sodium-coupled neutral amino acid transporter 6 [Malus domestica]	PREDICTED: Malus x domestica probable sodium-coupled neutral amino acid transporter 6 (LOC103437754), mRNA
CS2_vs_CS1	gene.MD01G1164700	2.84685e-54	-1.12197	down	[P]	Inorganic ion transport and metabolism	Molecular Function: superoxide dismutase activity (GO:0004784);; Cellular Component: mitochondrial matrix (GO:0005759);; Biological Process: removal of superoxide radicals (GO:0019430);; Molecular Function: metal ion binding (GO:0046872);; Biological Process: oxidation-reduction process (GO:0055114);;	K04564|2e-132|vvi:100233137|MNSOD	Superoxide dismutase [Mn], mitochondrial (Precursor) GN=SOD OS=Prunus persica (Peach) PE=2 SV=1	Superoxide dismutase GN=PRUPE_ppa010748mg OS=Prunus persica (Peach) PE=2 SV=1	PREDICTED: superoxide dismutase [Mn], mitochondrial-like [Malus domestica]	PREDICTED: Malus x domestica superoxide dismutase [Mn], mitochondrial-like (LOC103426425), mRNA
CS2_vs_CS1	gene.MD01G1165900	3.78918e-18	1.60235	up	[P]	Inorganic ion transport and metabolism	--	K03549|0.0|vvi:100232992|KUP2	Potassium transporter 2 GN=T2P4.11 OS=Arabidopsis thaliana (Mouse-ear cress) PE=1 SV=2	Uncharacterized protein GN=PRUPE_ppa001638mg OS=Prunus persica (Peach) PE=4 SV=1	PREDICTED: potassium transporter 2-like [Malus domestica]	PREDICTED: Malus x domestica potassium transporter 2-like (LOC103417793), mRNA
CS2_vs_CS1	gene.MD01G1167200	5.94574e-183	2.88154	up	--	--	Molecular Function: zinc ion binding (GO:0008270);;	--	RING-H2 finger protein ATL74 GN=ATL74 OS=Arabidopsis thaliana (Mouse-ear cress) PE=2 SV=1	Uncharacterized protein GN=PRUPE_ppa011446mg OS=Prunus persica (Peach) PE=4 SV=1	PREDICTED: RING-H2 finger protein ATL74-like [Malus domestica]	PREDICTED: Malus x domestica RING-H2 finger protein ATL74-like (LOC103430447), mRNA
CS2_vs_CS1	gene.MD01G1169400	1.63353e-05	1.34569	up	--	--	--	--	F-box protein At2g40910 GN=At2g40910 OS=Arabidopsis thaliana (Mouse-ear cress) PE=2 SV=1	Uncharacterized protein GN=PRUPE_ppa012453mg OS=Prunus persica (Peach) PE=4 SV=1	PREDICTED: probable RNA-binding protein EIF1AD [Malus domestica]	PREDICTED: Malus x domestica probable RNA-binding protein EIF1AD (LOC103430453), mRNA
CS2_vs_CS1	gene.MD01G1170000	2.97417e-08	-1.18232	down	--	--	--	--	--	Uncharacterized protein GN=PRUPE_ppa003983mg OS=Prunus persica (Peach) PE=4 SV=1	PREDICTED: protein NETWORKED 4A-like [Malus domestica]	PREDICTED: Malus x domestica protein NETWORKED 4A-like (LOC103413921), mRNA
CS2_vs_CS1	gene.MD01G1171100	9.29274e-56	-2.63121	down	[J]	Translation, ribosomal structure and biogenesis	Molecular Function: structural constituent of ribosome (GO:0003735);; Cellular Component: ribosome (GO:0005840);; Biological Process: translation (GO:0006412);;	K02866|3e-149|vvi:100241995|hypothetical protein LOC100241995	60S ribosomal protein L10 GN=RPL10 OS=Vitis riparia (Frost grape) PE=2 SV=1	Putative uncharacterized protein OS=Glycine max (Soybean) PE=2 SV=1	PREDICTED: 60S ribosomal protein L10 [Pyrus x bretschneideri]	PREDICTED: Pyrus x bretschneideri 60S ribosomal protein L10 (LOC103952805), mRNA
CS2_vs_CS1	gene.MD01G1173500	1.20461e-05	1.1003	up	--	--	Molecular Function: cysteine-type endopeptidase activity (GO:0004197);; Biological Process: proteolysis (GO:0006508);;	--	Metacaspase-1 GN=T7I23.17 OS=Arabidopsis thaliana (Mouse-ear cress) PE=1 SV=1	Uncharacterized protein GN=PRUPE_ppa007699mg OS=Prunus persica (Peach) PE=4 SV=1	PREDICTED: metacaspase-1-like [Malus domestica]	PREDICTED: Malus x domestica metacaspase-1-like (LOC103416103), mRNA
CS2_vs_CS1	gene.MD01G1173700	0.00053384	-1.1309	down	[P]	Inorganic ion transport and metabolism	Molecular Function: superoxide dismutase activity (GO:0004784);; Biological Process: superoxide metabolic process (GO:0006801);; Molecular Function: metal ion binding (GO:0046872);; Biological Process: oxidation-reduction process (GO:0055114);;	--	Superoxide dismutase [Fe] 2, chloroplastic (Precursor) GN=MWD22.4 OS=Arabidopsis thaliana (Mouse-ear cress) PE=1 SV=1	Uncharacterized protein GN=PRUPE_ppa008765mg OS=Prunus persica (Peach) PE=4 SV=1	PREDICTED: superoxide dismutase [Fe], chloroplastic-like isoform X2 [Malus domestica]	PREDICTED: Malus x domestica superoxide dismutase [Fe], chloroplastic-like (LOC103431645), transcript variant X2, mRNA
CS2_vs_CS1	gene.MD01G1174400	2.55646e-08	1.0491	up	[E]	Amino acid transport and metabolism	Biological Process: cellular amino acid metabolic process (GO:0006520);; Molecular Function: oxidoreductase activity, acting on the CH-NH2 group of donors, NAD or NADP as acceptor (GO:0016639);; Biological Process: oxidation-reduction process (GO:0055114);;	K00261|0.0|rcu:RCOM_1502760|glutamate dehydrogenase, putative (EC:1.4.1.3)	Glutamate dehydrogenase 2 GN=GDH2 OS=Arabidopsis thaliana (Mouse-ear cress) PE=1 SV=1	Uncharacterized protein GN=PRUPE_ppa006442mg OS=Prunus persica (Peach) PE=4 SV=1	PREDICTED: glutamate dehydrogenase 2 [Pyrus x bretschneideri]	PREDICTED: Malus x domestica glutamate dehydrogenase 2 (LOC103438445), mRNA
CS2_vs_CS1	gene.MD01G1175700	1.66639e-13	Inf	up	[Q]	Secondary metabolites biosynthesis, transport and catabolism	Molecular Function: monooxygenase activity (GO:0004497);; Molecular Function: iron ion binding (GO:0005506);; Cellular Component: plasma membrane (GO:0005886);; Molecular Function: electron carrier activity (GO:0009055);; Molecular Function: oxidoreductase activity, acting on paired donors, with incorporation or reduction of molecular oxygen (GO:0016705);; Molecular Function: oxygen binding (GO:0…	--	Cytochrome P450 77A3 GN=CYP77A3 OS=Glycine max (Soybean) PE=2 SV=1	Uncharacterized protein GN=PRUPE_ppa026370mg OS=Prunus persica (Peach) PE=4 SV=1	PREDICTED: cytochrome P450 77A3-like [Pyrus x bretschneideri]	PREDICTED: Pyrus x bretschneideri cytochrome P450 77A3-like (LOC103952772), mRNA
CS2_vs_CS1	gene.MD01G1178700	0.000841648	3.7742	up	--	--	--	--	LRR receptor-like serine/threonine-protein kinase FLS2 (Precursor) GN=FLS2 OS=Arabidopsis thaliana (Mouse-ear cress) PE=1 SV=1	M18S-3Ap OS=Malus floribunda PE=4 SV=1	PREDICTED: leucine-rich repeat receptor protein kinase MSP1-like [Malus domestica]	Malus floribunda clone M18S-5Bs Vf apple scab resistance protein HcrVf2-like gene, complete sequence
CS2_vs_CS1	gene.MD01G1183200	2.31005e-05	-2.40518	down	--	--	--	--	--	--	PREDICTED: uncharacterized protein LOC103438003 [Malus domestica]	PREDICTED: Malus x domestica uncharacterized LOC103438003 (LOC103438003), transcript variant X2, mRNA
CS2_vs_CS1	gene.MD01G1185600	8.38314e-20	-1.06947	down	--	--	Molecular Function: 2-alkenal reductase [NAD(P)] activity (GO:0032440);; Biological Process: oxidation-reduction process (GO:0055114);;	--	Probable rRNA-processing protein EBP2 homolog GN=At3g22660 OS=Arabidopsis thaliana (Mouse-ear cress) PE=2 SV=1	Uncharacterized protein GN=PRUPE_ppa009393mg OS=Prunus persica (Peach) PE=4 SV=1	PREDICTED: probable rRNA-processing protein EBP2 homolog [Malus domestica]	PREDICTED: Malus x domestica probable rRNA-processing protein EBP2 homolog (LOC103439560), transcript variant X2, mRNA
CS2_vs_CS1	gene.MD01G1186200	6.15764e-28	-1.50522	down	--	--	--	--	--	Uncharacterized protein GN=PRUPE_ppa004872mg OS=Prunus persica (Peach) PE=4 SV=1	PREDICTED: uncharacterized protein LOC103406497 [Malus domestica]	PREDICTED: Malus x domestica uncharacterized LOC103406497 (LOC103406497), mRNA
CS2_vs_CS1	gene.MD01G1187600	5.55055e-44	-1.4828	down	--	--	Biological Process: glucose catabolic process (GO:0006007);; Molecular Function: galactosyltransferase activity (GO:0008378);; Biological Process: xyloglucan biosynthetic process (GO:0009969);; Cellular Component: membrane (GO:0016020);;	--	Xyloglucan galactosyltransferase KATAMARI1 homolog OS=Oryza sativa subsp. japonica (Rice) PE=2 SV=1	Uncharacterized protein GN=PRUPE_ppa003851mg OS=Prunus persica (Peach) PE=4 SV=1	PREDICTED: xyloglucan galactosyltransferase XLT2 [Malus domestica]	PREDICTED: Malus x domestica xyloglucan galactosyltransferase XLT2 (LOC103439678), mRNA
CS2_vs_CS1	gene.MD01G1189300	0.000210057	-1.103	down	--	--	--	--	--	--	PREDICTED: inactive disease resistance protein RPS4-like [Malus domestica]	PREDICTED: Malus x domestica protein SUPPRESSOR OF npr1-1, CONSTITUTIVE 1-like (LOC103441060), mRNA
CS2_vs_CS1	gene.MD01G1194700	1.02029e-161	1.54295	up	[ER]	--	Molecular Function: L-iditol 2-dehydrogenase activity (GO:0003939);; Molecular Function: zinc ion binding (GO:0008270);; Biological Process: oxidation-reduction process (GO:0055114);;	K00008|0.0|pop:POPTR_823499|L-iditol 2-dehydrogenase (EC:1.1.1.14)	Sorbitol dehydrogenase GN=SDH OS=Arabidopsis thaliana (Mouse-ear cress) PE=1 SV=1	NAD-dependent sorbitol dehydrogenase 9 OS=Malus domestica (Apple) PE=2 SV=1	PREDICTED: sorbitol dehydrogenase-like [Malus domestica]	PREDICTED: Malus x domestica sorbitol dehydrogenase-like (LOC103440086), mRNA
CS2_vs_CS1	gene.MD01G1195100	2.25395e-66	2.62827	up	[ER]	--	Molecular Function: L-iditol 2-dehydrogenase activity (GO:0003939);; Molecular Function: zinc ion binding (GO:0008270);; Biological Process: oxidation-reduction process (GO:0055114);;	K00008|9e-144|pop:POPTR_823499|L-iditol 2-dehydrogenase (EC:1.1.1.14)	Sorbitol dehydrogenase GN=SDH OS=Arabidopsis thaliana (Mouse-ear cress) PE=1 SV=1	NAD-dependent sorbitol dehydrogenase 2 OS=Malus domestica (Apple) PE=2 SV=1	PREDICTED: sorbitol dehydrogenase-like [Malus domestica]	PREDICTED: Malus x domestica sorbitol dehydrogenase-like (LOC103440075), mRNA
CS2_vs_CS1	gene.MD01G1195500	3.62524e-13	-6.27834	down	[ER]	--	Molecular Function: L-iditol 2-dehydrogenase activity (GO:0003939);; Molecular Function: zinc ion binding (GO:0008270);; Biological Process: oxidation-reduction process (GO:0055114);;	K00008|0.0|pop:POPTR_823499|L-iditol 2-dehydrogenase (EC:1.1.1.14)	Sorbitol dehydrogenase GN=SDH OS=Arabidopsis thaliana (Mouse-ear cress) PE=1 SV=1	NAD-dependent sorbitol dehydrogenase 9 OS=Malus domestica (Apple) PE=2 SV=1	PREDICTED: sorbitol dehydrogenase-like [Malus domestica]	PREDICTED: Malus x domestica sorbitol dehydrogenase-like (LOC103440114), transcript variant X2, mRNA
CS2_vs_CS1	gene.MD01G1195900	0.000357051	-1.07912	down	[S]	Function unknown	--	--	--	Uncharacterized protein GN=PRUPE_ppa008189mg OS=Prunus persica (Peach) PE=4 SV=1	PREDICTED: post-GPI attachment to proteins factor 3 [Malus domestica]	PREDICTED: Malus x domestica post-GPI attachment to proteins factor 3 (LOC103440215), mRNA
CS2_vs_CS1	gene.MD01G1198000	1.20127e-180	-1.94429	down	[R]	General function prediction only	Molecular Function: serine-type endopeptidase activity (GO:0004252);; Biological Process: proteolysis (GO:0006508);; Cellular Component: integral component of membrane (GO:0016021);;	--	--	Uncharacterized protein GN=PRUPE_ppa008564mg OS=Prunus persica (Peach) PE=4 SV=1	PREDICTED: RHOMBOID-like protein 2 [Malus domestica]	PREDICTED: Malus x domestica RHOMBOID-like protein 2 (LOC103440341), mRNA
CS2_vs_CS1	gene.MD01G1199300	3.17036e-08	1.31736	up	--	--	--	--	Methyl-CpG-binding domain-containing protein 13 GN=MBD13 OS=Arabidopsis thaliana (Mouse-ear cress) PE=2 SV=1	Uncharacterized protein GN=PRUPE_ppa007049mg OS=Prunus persica (Peach) PE=4 SV=1	PREDICTED: uncharacterized protein LOC103441353 [Malus domestica]	PREDICTED: Malus x domestica uncharacterized LOC103441353 (LOC103441353), mRNA
CS2_vs_CS1	gene.MD01G1200700	1.68129e-33	1.06269	up	--	--	--	--	--	Uncharacterized protein GN=PRUPE_ppa001107mg OS=Prunus persica (Peach) PE=4 SV=1	PREDICTED: A-kinase anchor protein 9-like [Malus domestica]	PREDICTED: Malus x domestica A-kinase anchor protein 9-like (LOC103406511), mRNA
CS2_vs_CS1	gene.MD01G1201200	3.18262e-30	-1.42531	down	--	--	Biological Process: metal ion transport (GO:0030001);; Molecular Function: metal ion binding (GO:0046872);;	--	--	Putative uncharacterized protein OS=Arabidopsis thaliana (Mouse-ear cress) PE=2 SV=1	PREDICTED: uncharacterized protein LOC103417841 isoform X2 [Malus domestica]	PREDICTED: Malus x domestica uncharacterized LOC103417841 (LOC103417841), transcript variant X2, mRNA
CS2_vs_CS1	gene.MD01G1201700	0.00175018	-1.21318	down	[OU]	--	Molecular Function: binding (GO:0005488);;	--	Replication protein A 70 kDa DNA-binding subunit C OS=Oryza sativa subsp. japonica (Rice) PE=1 SV=1	Uncharacterized protein (Fragment) GN=PRUPE_ppa022999mg OS=Prunus persica (Peach) PE=4 SV=1	PREDICTED: cold shock protein 1-like isoform X2 [Pyrus x bretschneideri]	PREDICTED: Pyrus x bretschneideri cold shock protein 1-like (LOC103932201), transcript variant X2, mRNA
CS2_vs_CS1	gene.MD01G1204300	0	3.65678	up	[Q]	Secondary metabolites biosynthesis, transport and catabolism	Molecular Function: iron ion binding (GO:0005506);; Molecular Function: electron carrier activity (GO:0009055);; Molecular Function: heme binding (GO:0020037);; Biological Process: oxidation-reduction process (GO:0055114);; Molecular Function: aromatase activity (GO:0070330);;	--	Cytochrome P450 89A2 GN=F13O11.20 OS=Arabidopsis thaliana (Mouse-ear cress) PE=2 SV=2	Uncharacterized protein GN=PRUPE_ppa004199mg OS=Prunus persica (Peach) PE=4 SV=1	PREDICTED: cytochrome P450 89A2-like [Malus domestica]	PREDICTED: Malus x domestica cytochrome P450 89A2-like (LOC103437382), mRNA
CS2_vs_CS1	gene.MD01G1204400	2.24069e-173	3.58115	up	[Q]	Secondary metabolites biosynthesis, transport and catabolism	--	--	Cytochrome P450 89A2 GN=F13O11.20 OS=Arabidopsis thaliana (Mouse-ear cress) PE=2 SV=2	Uncharacterized protein GN=PRUPE_ppa004199mg OS=Prunus persica (Peach) PE=4 SV=1	PREDICTED: cytochrome P450 89A2-like [Malus domestica]	PREDICTED: Malus x domestica cytochrome P450 89A2-like (LOC103442790), mRNA
CS2_vs_CS1	gene.MD01G1206000	6.46203e-36	-1.06191	down	[J]	Translation, ribosomal structure and biogenesis	Molecular Function: RNA binding (GO:0003723);; Biological Process: rRNA processing (GO:0006364);; Biological Process: tRNA processing (GO:0008033);; Molecular Function: methyltransferase activity (GO:0008168);; Biological Process: methylation (GO:0032259);;	K14563|6e-167|rcu:RCOM_1582870|fibrillarin, putative (EC:2.7.11.1)	Mediator of RNA polymerase II transcription subunit 36a GN=L73G19.10 OS=Arabidopsis thaliana (Mouse-ear cress) PE=1 SV=2	Uncharacterized protein GN=PRUPE_ppa010543mg OS=Prunus persica (Peach) PE=4 SV=1	PREDICTED: mediator of RNA polymerase II transcription subunit 36a-like [Malus domestica]	PREDICTED: Malus x domestica mediator of RNA polymerase II transcription subunit 36a-like (LOC103442968), mRNA
CS2_vs_CS1	gene.MD01G1206300	0	-3.3666	down	[V]	Defense mechanisms	Biological Process: drug transmembrane transport (GO:0006855);; Molecular Function: drug transmembrane transporter activity (GO:0015238);; Molecular Function: antiporter activity (GO:0015297);; Cellular Component: membrane (GO:0016020);;	--	Protein TRANSPARENT TESTA 12 GN=F17J16_80 OS=Arabidopsis thaliana (Mouse-ear cress) PE=2 SV=1	Uncharacterized protein GN=PRUPE_ppa004822mg OS=Prunus persica (Peach) PE=4 SV=1	PREDICTED: protein TRANSPARENT TESTA 12-like [Pyrus x bretschneideri]	PREDICTED: Pyrus x bretschneideri protein TRANSPARENT TESTA 12-like (LOC103966119), mRNA
CS2_vs_CS1	gene.MD01G1209500	2.1375e-05	-1.18308	down	--	--	--	--	Uncharacterized protein At3g49140 GN=At3g49140 OS=Arabidopsis thaliana (Mouse-ear cress) PE=1 SV=2	Uncharacterized protein GN=PRUPE_ppa007305mg OS=Prunus persica (Peach) PE=4 SV=1	PREDICTED: uncharacterized protein At3g49140-like [Pyrus x bretschneideri]	PREDICTED: Malus x domestica uncharacterized protein At3g49140-like (LOC103445258), mRNA
CS2_vs_CS1	gene.MD01G1211100	2.41818e-33	2.1998	up	--	--	--	--	Reticulon-like protein B5 GN=RTNLB5 OS=Arabidopsis thaliana (Mouse-ear cress) PE=1 SV=1	Uncharacterized protein GN=PRUPE_ppa010065mg OS=Prunus persica (Peach) PE=4 SV=1	PREDICTED: reticulon-like protein B1 [Malus domestica]	PREDICTED: Malus x domestica reticulon-like protein B1 (LOC103406566), mRNA
CS2_vs_CS1	gene.MD01G1211300	5.5462e-26	1.7195	up	[O]	Posttranslational modification, protein turnover, chaperones	Molecular Function: ATP binding (GO:0005524);; Molecular Function: microtubule-severing ATPase activity (GO:0008568);;	--	Katanin p60 ATPase-containing subunit A1 GN=At1g80350 OS=Arabidopsis thaliana (Mouse-ear cress) PE=1 SV=1	Uncharacterized protein GN=PRUPE_ppa001598mg OS=Prunus persica (Peach) PE=4 SV=1	PREDICTED: putative cell division cycle ATPase [Pyrus x bretschneideri]	PREDICTED: Pyrus x bretschneideri putative cell division cycle ATPase (LOC103964347), mRNA
CS2_vs_CS1	gene.MD01G1212800	4.68348e-167	1.49862	up	[G]	Carbohydrate transport and metabolism	Molecular Function: magnesium ion binding (GO:0000287);; Molecular Function: pyruvate kinase activity (GO:0004743);; Cellular Component: mitochondrion (GO:0005739);; Biological Process: glycolytic process (GO:0006096);; Biological Process: fatty acid biosynthetic process (GO:0006633);; Cellular Component: chloroplast stroma (GO:0009570);; Biological Process: seed maturation (GO:0010431);; Biologi…	K00873|0.0|rcu:RCOM_1581420|pyruvate kinase, putative (EC:2.7.1.40)	Plastidial pyruvate kinase 2 (Precursor) GN=MXC20.15 OS=Arabidopsis thaliana (Mouse-ear cress) PE=1 SV=1	Uncharacterized protein GN=PRUPE_ppa002592mg OS=Prunus persica (Peach) PE=4 SV=1	PREDICTED: plastidial pyruvate kinase 2-like [Malus domestica]	PREDICTED: Malus x domestica plastidial pyruvate kinase 2-like (LOC103443326), mRNA
CS2_vs_CS1	gene.MD01G1213100	0	3.65259	up	--	--	Molecular Function: hydrolase activity, hydrolyzing O-glycosyl compounds (GO:0004553);; Biological Process: carbohydrate metabolic process (GO:0005975);;	--	Acidic endochitinase (Precursor) OS=Cicer arietinum (Chickpea) PE=2 SV=1	Class III chitinase OS=Pyrus pyrifolia (Chinese pear) PE=2 SV=1	PREDICTED: acidic endochitinase-like [Malus domestica]	PREDICTED: Malus x domestica acidic endochitinase-like (LOC103443365), mRNA
CS2_vs_CS1	gene.MD01G1213300	6.95287e-07	1.13934	up	--	--	Molecular Function: hydrolase activity, hydrolyzing O-glycosyl compounds (GO:0004553);; Biological Process: carbohydrate metabolic process (GO:0005975);;	--	Acidic endochitinase (Precursor) OS=Phaseolus angularis (Azuki bean) PE=2 SV=1	Pathogenesis related protein 8 (Fragment) GN=PR8 OS=Malus domestica (Apple) PE=3 SV=1	PREDICTED: acidic endochitinase SE2-like [Malus domestica]	PREDICTED: Malus x domestica acidic endochitinase SE2-like (LOC103417873), mRNA
CS2_vs_CS1	gene.MD01G1214100	1.65519e-15	2.83221	up	[RTKL]	--	Molecular Function: protein kinase activity (GO:0004672);; Molecular Function: ATP binding (GO:0005524);; Biological Process: protein phosphorylation (GO:0006468);; Cellular Component: integral component of membrane (GO:0016021);;	--	Probable inactive receptor kinase At4g23740 (Precursor) GN=At4g23740 OS=Arabidopsis thaliana (Mouse-ear cress) PE=1 SV=1	Uncharacterized protein GN=PRUPE_ppa002831mg OS=Prunus persica (Peach) PE=4 SV=1	PREDICTED: probable inactive receptor kinase At4g23740 [Malus domestica]	PREDICTED: Malus x domestica probable inactive receptor kinase At4g23740 (LOC103426494), mRNA
CS2_vs_CS1	gene.MD01G1216400	1.73372e-05	1.20786	up	[O]	Posttranslational modification, protein turnover, chaperones	--	--	Chaperone protein dnaJ 49 OS=Arabidopsis thaliana (Mouse-ear cress) PE=2 SV=2	Uncharacterized protein GN=PRUPE_ppa002023mg OS=Prunus persica (Peach) PE=4 SV=1	PREDICTED: uncharacterized protein LOC103443572 isoform X1 [Malus domestica]	PREDICTED: Malus x domestica uncharacterized LOC103443572 (LOC103443572), transcript variant X5, mRNA
CS2_vs_CS1	gene.MD01G1216500	1.72496e-07	1.01001	up	--	--	--	--	--	Uncharacterized protein GN=PRUPE_ppa008060mg OS=Prunus persica (Peach) PE=4 SV=1	PREDICTED: uncharacterized protein LOC103443558 [Malus domestica]	PREDICTED: Malus x domestica uncharacterized LOC103443558 (LOC103443558), mRNA
CS2_vs_CS1	gene.MD01G1220200	2.17334e-08	1.86711	up	--	--	Molecular Function: N-acetyltransferase activity (GO:0008080);;	--	--	Uncharacterized protein GN=PRUPE_ppa009577mg OS=Prunus persica (Peach) PE=4 SV=1	PREDICTED: uncharacterized protein LOC103443732 [Malus domestica]	PREDICTED: Malus x domestica uncharacterized LOC103443732 (LOC103443732), mRNA
CS2_vs_CS1	gene.MD01G1220500	1.40683e-10	-1.96165	down	--	--	--	--	Protein BOBBER 1 GN=BOB1 OS=Arabidopsis thaliana (Mouse-ear cress) PE=1 SV=1	Uncharacterized protein OS=Glycine max (Soybean) PE=4 SV=1	PREDICTED: protein BOBBER 1-like [Malus domestica]	PREDICTED: Malus x domestica protein BOBBER 1-like (LOC103443878), mRNA
CS2_vs_CS1	gene.MD01G1220700	2.49629e-08	1.49238	up	--	--	Molecular Function: enzyme inhibitor activity (GO:0004857);; Cellular Component: cell wall (GO:0005618);; Molecular Function: pectinesterase activity (GO:0030599);; Biological Process: cell wall modification (GO:0042545);; Biological Process: negative regulation of catalytic activity (GO:0043086);; Molecular Function: aspartyl esterase activity (GO:0045330);; Biological Process: pectin catabolic …	--	Pectinesterase 34 GN=F2K15.80 OS=Arabidopsis thaliana (Mouse-ear cress) PE=2 SV=1	Pectinesterase GN=PcPME1 OS=Pyrus communis (Pear) PE=2 SV=1	PREDICTED: probable pectinesterase/pectinesterase inhibitor 34 [Malus domestica]	PREDICTED: Malus x domestica probable pectinesterase/pectinesterase inhibitor 34 (LOC103443868), mRNA
CS2_vs_CS1	gene.MD01G1222100	1.73271e-26	-1.94103	down	--	--	--	--	Cyclic nucleotide-gated ion channel 1 GN=CNGC1 OS=Arabidopsis thaliana (Mouse-ear cress) PE=1 SV=1	Uncharacterized protein GN=PRUPE_ppb025026mg OS=Prunus persica (Peach) PE=4 SV=1	PREDICTED: cyclic nucleotide-gated ion channel 1-like isoform X1 [Malus domestica]	PREDICTED: Malus x domestica cyclic nucleotide-gated ion channel 1-like (LOC103444117), transcript variant X1, mRNA
CS2_vs_CS1	gene.MD01G1224800	3.69713e-139	-2.20227	down	--	--	--	--	Protein yippee-like At4g27740 GN=At4g27740 OS=Arabidopsis thaliana (Mouse-ear cress) PE=3 SV=1	Uncharacterized protein GN=PRUPE_ppa025538mg OS=Prunus persica (Peach) PE=4 SV=1	PREDICTED: protein yippee-like At4g27740 [Malus domestica]	PREDICTED: Malus x domestica protein yippee-like At4g27740 (LOC103406588), mRNA
CS2_vs_CS1	gene.MD01G1225700	0.000107913	-1.40132	down	[O]	Posttranslational modification, protein turnover, chaperones	--	--	26S protease regulatory subunit 6B homolog GN=MCK7.16 OS=Arabidopsis thaliana (Mouse-ear cress) PE=1 SV=1	ATP binding protein OS=Rosa rugosa (Rugosa rose) PE=4 SV=1	PREDICTED: AAA-ATPase At2g46620-like [Malus domestica]	PREDICTED: Malus x domestica AAA-ATPase At2g46620-like (LOC103444243), mRNA
CS2_vs_CS1	gene.MD01G1226000	2.39099e-141	-1.48777	down	--	--	Molecular Function: heme binding (GO:0020037);; Molecular Function: metal ion binding (GO:0046872);;	--	Cytochrome b5 GN=CYB5 OS=Brassica oleracea var. botrytis (Cauliflower) PE=1 SV=1	Cytochrome b5 GN=CYB5 OS=Malus domestica (Apple) PE=2 SV=2	PREDICTED: cytochrome b5-like isoform X1 [Malus domestica]	PREDICTED: Malus x domestica cytochrome b5-like (CYB5), transcript variant X1, mRNA
CS2_vs_CS1	gene.MD01G1226600	3.84442750653851e-316	2.0758	up	--	--	Molecular Function: transcription regulatory region sequence-specific DNA binding (GO:0000976);; Molecular Function: transcription factor activity, sequence-specific DNA binding (GO:0003700);; Cellular Component: nucleus (GO:0005634);; Biological Process: regulation of transcription, DNA-templated (GO:0006355);;	--	Homeobox-leucine zipper protein HOX6 GN=OJ1439_F07.36 OS=Oryza sativa subsp. japonica (Rice) PE=2 SV=1	HD domain class transcription factor GN=HD7 OS=Malus domestica (Apple) PE=2 SV=1	PREDICTED: homeobox-leucine zipper protein ATHB-7-like [Malus domestica]	PREDICTED: Malus x domestica homeobox-leucine zipper protein ATHB-7-like (LOC103444266), mRNA
CS2_vs_CS1	gene.MD01G1226700	4.36581e-09	2.50509	up	--	--	--	--	--	--	--	PREDICTED: Pyrus x bretschneideri uncharacterized LOC103951602 (LOC103951602), ncRNA
CS2_vs_CS1	gene.MD01G1228200	3.64146e-102	1.23268	up	[T]	Signal transduction mechanisms	Biological Process: response to light stimulus (GO:0009416);; Biological Process: primary metabolic process (GO:0044238);; Biological Process: cellular macromolecule metabolic process (GO:0044260);; Biological Process: single-organism cellular process (GO:0044763);; Biological Process: regulation of cellular process (GO:0050794);;	--	Two-component response regulator-like APRR5 GN=APRR5 OS=Arabidopsis thaliana (Mouse-ear cress) PE=1 SV=2	Uncharacterized protein GN=PRUPE_ppa002188mg OS=Prunus persica (Peach) PE=4 SV=1	PREDICTED: two-component response regulator-like APRR5 isoform X1 [Pyrus x bretschneideri]	PREDICTED: Pyrus x bretschneideri two-component response regulator-like APRR5 (LOC103943360), transcript variant X1, mRNA
CS2_vs_CS1	gene.MD01G1228300	0.00831231	-1.26107	down	--	--	--	--	--	Uncharacterized protein GN=PRUPE_ppa011423mg OS=Prunus persica (Peach) PE=4 SV=1	PREDICTED: NDR1/HIN1-like protein 12 [Malus domestica]	PREDICTED: Malus x domestica NDR1/HIN1-like protein 12 (LOC103444357), mRNA
CS2_vs_CS1	gene.MD01G1229900	8.706e-05	1.85185	up	--	--	Molecular Function: DNA binding (GO:0003677);; Biological Process: regulation of transcription, DNA-templated (GO:0006355);;	--	NAC domain-containing protein 78 GN=T32M21.10 OS=Arabidopsis thaliana (Mouse-ear cress) PE=2 SV=2	NAC domain class transcription factor GN=NAC13 OS=Malus domestica (Apple) PE=2 SV=1	PREDICTED: NAC domain-containing protein 91-like [Malus domestica]	PREDICTED: Malus x domestica NAC domain-containing protein 91-like (LOC103444404), mRNA
CS2_vs_CS1	gene.MD01G1230100	3.27594e-08	2.56736	up	--	--	Molecular Function: calcium ion binding (GO:0005509);;	--	Uncharacterized calcium-binding protein At1g02270 GN=At1g02270 OS=Arabidopsis thaliana (Mouse-ear cress) PE=2 SV=2	Uncharacterized protein GN=PRUPE_ppa005781mg OS=Prunus persica (Peach) PE=4 SV=1	PREDICTED: uncharacterized calcium-binding protein At1g02270 [Malus domestica]	PREDICTED: Malus x domestica uncharacterized calcium-binding protein At1g02270 (LOC103444414), mRNA
CS2_vs_CS1	gene.MD01G1230700	1.96268e-11	-1.48557	down	[GEPR]	--	--	--	UNC93-like protein 2 GN=At1g18010 OS=Arabidopsis thaliana (Mouse-ear cress) PE=2 SV=2	Uncharacterized protein GN=PRUPE_ppa005325mg OS=Prunus persica (Peach) PE=4 SV=1	PREDICTED: UNC93-like protein 1 [Pyrus x bretschneideri]	PREDICTED: Pyrus x bretschneideri UNC93-like protein 1 (LOC103943336), mRNA
CS2_vs_CS1	gene.MD01G1231200	2.24313e-14	1.071	up	--	--	--	--	--	Uncharacterized protein GN=PRUPE_ppa013005mg OS=Prunus persica (Peach) PE=4 SV=1	PREDICTED: uncharacterized protein LOC103439982 [Malus domestica]	PREDICTED: Pyrus x bretschneideri uncharacterized LOC103943330 (LOC103943330), mRNA
CS2_vs_CS1	gene.MD01G1231400	2.69621e-05	-1.06527	down	--	--	--	--	DNA-binding protein BIN4 GN=K18P6.17 OS=Arabidopsis thaliana (Mouse-ear cress) PE=1 SV=2	Uncharacterized protein (Fragment) GN=PRUPE_ppa025392mg OS=Prunus persica (Peach) PE=4 SV=1	PREDICTED: DNA-binding protein BIN4-like [Malus domestica]	PREDICTED: Malus x domestica DNA-binding protein BIN4-like (LOC103444503), transcript variant X2, mRNA
CS2_vs_CS1	gene.MD01G1231600	4.61891e-15	3.82679	up	--	--	--	--	--	Uncharacterized protein GN=PRUPE_ppa013690mg OS=Prunus persica (Peach) PE=4 SV=1	PREDICTED: putative golgin subfamily A member 6-like protein 3 [Malus domestica]	PREDICTED: Malus x domestica putative golgin subfamily A member 6-like protein 3 (LOC103444521), mRNA
CS2_vs_CS1	gene.MD01G1232900	0.00118736	-1.57404	down	--	--	--	--	Pentatricopeptide repeat-containing protein At5g42310, mitochondrial (Precursor) GN=At5g42310 OS=Arabidopsis thaliana (Mouse-ear cress) PE=2 SV=1	Uncharacterized protein GN=PRUPE_ppa005672mg OS=Prunus persica (Peach) PE=4 SV=1	PREDICTED: pentatricopeptide repeat-containing protein At5g42310, mitochondrial-like [Prunus mume]	PREDICTED: Pyrus x bretschneideri pentatricopeptide repeat-containing protein At5g42310, mitochondrial-like (LOC103951532), transcript variant X2, mRNA
CS2_vs_CS1	gene.MD01G1233000	1.24932e-74	-1.01757	down	--	--	--	--	--	Uncharacterized protein GN=PRUPE_ppa013385mg OS=Prunus persica (Peach) PE=4 SV=1	PREDICTED: uncharacterized protein LOC103439993 [Malus domestica]	PREDICTED: Pyrus x bretschneideri uncharacterized LOC103943318 (LOC103943318), mRNA
CS2_vs_CS1	gene.MD01G1233500	0.00672671	1.07011	up	[R]	General function prediction only	Biological Process: cell division (GO:0051301);;	K03363|0.0|vvi:100250079|hypothetical protein LOC100250079	Protein FIZZY-RELATED 2 GN=F7H19.90 OS=Arabidopsis thaliana (Mouse-ear cress) PE=1 SV=1	Uncharacterized protein GN=PRUPE_ppa019777mg OS=Prunus persica (Peach) PE=4 SV=1	PREDICTED: cell division cycle 20.1, cofactor of APC complex-like [Pyrus x bretschneideri]	PREDICTED: Pyrus x bretschneideri cell division cycle 20.1, cofactor of APC complex-like (LOC103943312), mRNA
CS2_vs_CS1	gene.MD01G1233600	1.44494e-05	1.05732	up	[G]	Carbohydrate transport and metabolism	Biological Process: metabolic process (GO:0008152);; Molecular Function: kinase activity (GO:0016301);;	K00851|8e-40|vvi:100264923|hypothetical protein LOC100264923	--	Glucokinase GN=GK OS=Malus domestica (Apple) PE=2 SV=1	glycerol kinase [Malus domestica]	Malus domestica glycerol kinase (GK), mRNA>gi|408362892|gb|JX459590.1| Malus x domestica cultivar Red Fuji glucokinase (GK) mRNA, complete cds
CS2_vs_CS1	gene.MD01G1234100	8.51276e-125	1.34652	up	[R]	General function prediction only	Biological Process: regulation of transcription, DNA-templated (GO:0006355);;	--	Protein TOPLESS GN=F7H2.9 OS=Arabidopsis thaliana (Mouse-ear cress) PE=1 SV=1	Putative uncharacterized protein GN=RCOM_1324430 OS=Ricinus communis (Castor bean) PE=4 SV=1	PREDICTED: topless-related protein 1-like isoform X2 [Pyrus x bretschneideri]	PREDICTED: Pyrus x bretschneideri topless-related protein 1-like (LOC103943306), transcript variant X2, mRNA
CS2_vs_CS1	gene.MD01G1236400	5.76689e-08	-1.50987	down	[R]	General function prediction only	Biological Process: rRNA processing (GO:0006364);; Molecular Function: myosin heavy chain kinase activity (GO:0016905);; Cellular Component: small-subunit processome (GO:0032040);;	K14555|0.0|rcu:RCOM_1327280|U3 small nucleolar RNA-associated protein, putative (EC:2.7.11.7)	Protein pleiotropic regulatory locus 1 OS=Arabidopsis thaliana (Mouse-ear cress) PE=1 SV=1	Uncharacterized protein GN=PRUPE_ppa001237mg OS=Prunus persica (Peach) PE=4 SV=1	PREDICTED: transducin beta-like protein 3 [Pyrus x bretschneideri]	PREDICTED: Pyrus x bretschneideri transducin beta-like protein 3 (LOC103943289), mRNA
CS2_vs_CS1	gene.MD01G1237600	1.35e-05	1.84736	up	--	--	Molecular Function: oxidoreductase activity, acting on the CH-OH group of donors, NAD or NADP as acceptor (GO:0016616);; Biological Process: single-organism metabolic process (GO:0044710);;	--	Tetraketide alpha-pyrone reductase 1 GN=F23E12.20 OS=Arabidopsis thaliana (Mouse-ear cress) PE=2 SV=1	Cinnamoyl-CoA reductase, putative GN=RCOM_1327300 OS=Ricinus communis (Castor bean) PE=3 SV=1	PREDICTED: cinnamoyl-CoA reductase 2-like isoform X2 [Malus domestica]	PREDICTED: Malus x domestica tetraketide alpha-pyrone reductase 1-like (LOC103444983), transcript variant X2, mRNA
CS2_vs_CS1	gene.MD02G1000900	3.26493e-46	-1.1456	down	[O]	Posttranslational modification, protein turnover, chaperones	Molecular Function: Rab GDP-dissociation inhibitor activity (GO:0005093);; Biological Process: protein transport (GO:0015031);;	--	--	Uncharacterized protein GN=PRUPE_ppa005772mg OS=Prunus persica (Peach) PE=4 SV=1	PREDICTED: guanosine nucleotide diphosphate dissociation inhibitor 2 [Malus domestica]	PREDICTED: Malus x domestica guanosine nucleotide diphosphate dissociation inhibitor 2 (LOC103417935), mRNA
CS2_vs_CS1	gene.MD02G1001300	1.2547e-08	-1.2319	down	--	--	Molecular Function: calmodulin binding (GO:0005516);; Biological Process: defense response (GO:0006952);; Biological Process: response to biotic stimulus (GO:0009607);; Cellular Component: integral component of membrane (GO:0016021);;	--	MLO-like protein 1 GN=T10P11.12 OS=Arabidopsis thaliana (Mouse-ear cress) PE=1 SV=1	Uncharacterized protein GN=PRUPE_ppa004012mg OS=Prunus persica (Peach) PE=4 SV=1	PREDICTED: MLO-like protein 1 [Pyrus x bretschneideri]	PREDICTED: Malus x domestica MLO-like protein 1 (LOC103446400), mRNA
CS2_vs_CS1	gene.MD02G1002600	0	3.51193	up	[R]	General function prediction only	Molecular Function: zinc ion binding (GO:0008270);; Molecular Function: 2-alkenal reductase [NAD(P)] activity (GO:0032440);; Biological Process: oxidation-reduction process (GO:0055114);;	K07119|2e-180|vvi:100256090|hypothetical protein LOC100256090	2-alkenal reductase (NADP(+)-dependent) GN=DBR OS=Nicotiana tabacum (Common tobacco) PE=1 SV=1	Ketone/zingerone synthase 1 GN=ZS1 OS=Rubus idaeus (Raspberry) PE=2 SV=1	PREDICTED: 2-alkenal reductase (NADP(+)-dependent)-like [Malus domestica]	PREDICTED: Malus x domestica 2-alkenal reductase (NADP(+)-dependent)-like (LOC103406679), mRNA
CS2_vs_CS1	gene.MD02G1007600	6.26931e-277	-1.84065	down	[E]	Amino acid transport and metabolism	Molecular Function: aminopeptidase activity (GO:0004177);; Cellular Component: cytoplasm (GO:0005737);; Biological Process: proteolysis (GO:0006508);; Molecular Function: metalloexopeptidase activity (GO:0008235);; Molecular Function: manganese ion binding (GO:0030145);;	K01255|0.0|vvi:100250183|hypothetical protein LOC100250183	Leucine aminopeptidase 3, chloroplastic (Precursor) GN=At4g30920 OS=Arabidopsis thaliana (Mouse-ear cress) PE=2 SV=2	Uncharacterized protein GN=PRUPE_ppa003434mg OS=Prunus persica (Peach) PE=4 SV=1	PREDICTED: leucine aminopeptidase 1-like [Malus domestica]	PREDICTED: Malus x domestica leucine aminopeptidase 1-like (LOC103447010), mRNA
CS2_vs_CS1	gene.MD02G1009200	2.7137e-10	1.24353	up	--	--	--	--	Transcription factor bHLH66 GN=F27D4.17 OS=Arabidopsis thaliana (Mouse-ear cress) PE=2 SV=1	Uncharacterized protein GN=PRUPE_ppa005254mg OS=Prunus persica (Peach) PE=4 SV=1	PREDICTED: transcription factor bHLH66-like [Malus domestica]	PREDICTED: Malus x domestica transcription factor bHLH66-like (LOC103406693), mRNA
CS2_vs_CS1	gene.MD02G1011000	3.20376e-12	-1.16405	down	--	--	--	--	--	Uncharacterized protein GN=PRUPE_ppa008105mg OS=Prunus persica (Peach) PE=4 SV=1	PREDICTED: uncharacterized protein LOC103955952 isoform X1 [Pyrus x bretschneideri]	PREDICTED: Pyrus x bretschneideri uncharacterized LOC103955952 (LOC103955952), transcript variant X1, mRNA
CS2_vs_CS1	gene.MD02G1015000	8.8761e-07	1.12776	up	--	--	Molecular Function: transferase activity, transferring acyl groups other than amino-acyl groups (GO:0016747);;	--	Benzyl alcohol O-benzoyltransferase GN=HSR201 OS=Nicotiana tabacum (Common tobacco) PE=1 SV=1	Alcohol acyl transferase GN=AAT2 OS=Malus domestica (Apple) PE=2 SV=1	alcohol acyl transferase, partial [Malus domestica]	PREDICTED: Malus x domestica methanol O-anthraniloyltransferase-like (LOC103416075), mRNA
CS2_vs_CS1	gene.MD02G1016300	8.74052e-22	Inf	up	--	--	--	--	--	Uncharacterized protein GN=PRUPE_ppa012311mg OS=Prunus persica (Peach) PE=4 SV=1	PREDICTED: uncharacterized protein LOC103447397 [Malus domestica]	PREDICTED: Malus x domestica uncharacterized LOC103447397 (LOC103447397), mRNA
CS2_vs_CS1	gene.MD02G1016900	3.93351e-06	-1.00097	down	[QR]	--	--	--	Uncharacterized methyltransferase At2g41040, chloroplastic (Precursor) GN=At2g41040 OS=Arabidopsis thaliana (Mouse-ear cress) PE=1 SV=1	Uncharacterized protein GN=PRUPE_ppa007882mg OS=Prunus persica (Peach) PE=4 SV=1	PREDICTED: uncharacterized methyltransferase At2g41040, chloroplastic-like [Pyrus x bretschneideri]	PREDICTED: Pyrus x bretschneideri uncharacterized methyltransferase At2g41040, chloroplastic-like (LOC103953843), mRNA
CS2_vs_CS1	gene.MD02G1018900	0.000217095	1.31422	up	[RTKL]	--	--	--	Probable receptor-like protein kinase At2g23200 (Precursor) GN=At2g23200 OS=Arabidopsis thaliana (Mouse-ear cress) PE=2 SV=1	Uncharacterized protein GN=PRUPE_ppa001450mg OS=Prunus persica (Peach) PE=4 SV=1	PREDICTED: probable receptor-like protein kinase At2g23200 [Malus domestica]	PREDICTED: Malus x domestica probable receptor-like protein kinase At2g23200 (LOC103451923), mRNA
CS2_vs_CS1	gene.MD02G1023200	1.21062e-12	6.22023	up	--	--	Cellular Component: chloroplast thylakoid membrane (GO:0009535);; Cellular Component: apoplast (GO:0048046);;	--	36.4 kDa proline-rich protein GN=TPRP-F1 OS=Solanum lycopersicum (Tomato) PE=2 SV=1	Uncharacterized protein GN=PRUPE_ppa010958mg OS=Prunus persica (Peach) PE=4 SV=1	PREDICTED: 36.4 kDa proline-rich protein-like [Malus domestica]	PREDICTED: Malus x domestica 36.4 kDa proline-rich protein-like (LOC103417982), mRNA
CS2_vs_CS1	gene.MD02G1025500	2.42393e-15	-2.60818	down	--	--	Biological Process: metabolic process (GO:0008152);; Molecular Function: hydrolase activity (GO:0016787);; Molecular Function: galactinol-raffinose galactosyltransferase activity (GO:0047268);;	--	Probable galactinol--sucrose galactosyltransferase 6 GN=F5O24.140 OS=Arabidopsis thaliana (Mouse-ear cress) PE=2 SV=2	Uncharacterized protein GN=PRUPE_ppa001896mg OS=Prunus persica (Peach) PE=4 SV=1	PREDICTED: probable galactinol--sucrose galactosyltransferase 6 isoform X1 [Pyrus x bretschneideri]	PREDICTED: Pyrus x bretschneideri probable galactinol--sucrose galactosyltransferase 6 (LOC103953905), transcript variant X2, mRNA
CS2_vs_CS1	gene.MD02G1026200	1.2923e-22	-2.39707	down	--	--	--	--	Probable galactinol--sucrose galactosyltransferase 6 GN=F5O24.140 OS=Arabidopsis thaliana (Mouse-ear cress) PE=2 SV=2	Uncharacterized protein GN=PRUPE_ppa001896mg OS=Prunus persica (Peach) PE=4 SV=1	PREDICTED: probable galactinol--sucrose galactosyltransferase 6 isoform X1 [Pyrus x bretschneideri]	PREDICTED: Pyrus x bretschneideri probable galactinol--sucrose galactosyltransferase 6 (LOC103953905), transcript variant X2, mRNA
CS2_vs_CS1	gene.MD02G1026300	5.14632e-47	-1.94228	down	--	--	Molecular Function: hydrolase activity, hydrolyzing O-glycosyl compounds (GO:0004553);; Biological Process: metabolic process (GO:0008152);; Cellular Component: plasmodesma (GO:0009506);; Biological Process: response to sucrose (GO:0009744);; Biological Process: response to fructose (GO:0009750);;	--	Probable galactinol--sucrose galactosyltransferase 6 GN=F5O24.140 OS=Arabidopsis thaliana (Mouse-ear cress) PE=2 SV=2	Uncharacterized protein GN=PRUPE_ppa001896mg OS=Prunus persica (Peach) PE=4 SV=1	PREDICTED: probable galactinol--sucrose galactosyltransferase 6 [Malus domestica]	PREDICTED: Malus x domestica probable galactinol--sucrose galactosyltransferase 6 (LOC103401588), mRNA
CS2_vs_CS1	gene.MD02G1026800	5.82102e-13	1.0203	up	[TZDR]	--	--	--	Calmodulin-like protein 7 GN=CML7 OS=Arabidopsis thaliana (Mouse-ear cress) PE=2 SV=1	Uncharacterized protein GN=PRUPE_ppa011179mg OS=Prunus persica (Peach) PE=4 SV=1	PREDICTED: calmodulin-like protein 3 [Malus domestica]	PREDICTED: Malus x domestica calmodulin-like protein 3 (LOC103426580), mRNA
CS2_vs_CS1	gene.MD02G1027900	5.42685e-49	-2.87423	down	--	--	--	--	Putative clathrin assembly protein At2g25430 GN=At2g25430 OS=Arabidopsis thaliana (Mouse-ear cress) PE=1 SV=2	Uncharacterized protein GN=PRUPE_ppa003005mg OS=Prunus persica (Peach) PE=4 SV=1	PREDICTED: putative clathrin assembly protein At2g25430 [Malus domestica]	PREDICTED: Malus x domestica putative clathrin assembly protein At2g25430 (LOC103426585), mRNA
CS2_vs_CS1	gene.MD02G1034000	0.000146692	-1.51599	down	--	--	Cellular Component: nucleus (GO:0005634);; Biological Process: ribosome biogenesis (GO:0042254);;	--	Ribosome biogenesis regulatory protein homolog GN=At2g37990 OS=Arabidopsis thaliana (Mouse-ear cress) PE=2 SV=2	Putative uncharacterized protein GN=VIT_15s0048g02730 OS=Vitis vinifera (Grape) PE=4 SV=1	PREDICTED: ribosome biogenesis regulatory protein homolog [Malus domestica]	PREDICTED: Malus x domestica ribosome biogenesis regulatory protein homolog (LOC103426598), mRNA
CS2_vs_CS1	gene.MD02G1035100	2.19093e-20	-1.17251	down	[HC]	--	Molecular Function: cytochrome-b5 reductase activity, acting on NAD(P)H (GO:0004128);; Molecular Function: copper ion binding (GO:0005507);; Cellular Component: mitochondrial intermembrane space (GO:0005758);; Cellular Component: Golgi apparatus (GO:0005794);; Biological Process: glycolytic process (GO:0006096);; Biological Process: water transport (GO:0006833);; Biological Process: hyperosmotic …	K00326|0.0|vvi:100254338|hypothetical protein LOC100254338	NADH-cytochrome b5 reductase-like protein GN=CBR2 OS=Arabidopsis thaliana (Mouse-ear cress) PE=1 SV=2	Uncharacterized protein GN=PRUPE_ppa008641mg OS=Prunus persica (Peach) PE=4 SV=1	PREDICTED: NADH-cytochrome b5 reductase-like protein [Pyrus x bretschneideri]	PREDICTED: Pyrus x bretschneideri NADH-cytochrome b5 reductase-like protein (LOC103958287), mRNA
CS2_vs_CS1	gene.MD02G1035500	9.9348e-29	-2.84763	down	[M]	Cell wall/membrane/envelope biogenesis	--	--	--	Uncharacterized protein GN=PRUPE_ppa008759mg OS=Prunus persica (Peach) PE=4 SV=1	PREDICTED: uncharacterized protein LOC103448302 isoform X2 [Malus domestica]	PREDICTED: Malus x domestica uncharacterized LOC103448302 (LOC103448302), transcript variant X2, mRNA
CS2_vs_CS1	gene.MD02G1039600	5.29474e-08	-1.01455	down	--	--	Biological Process: regulation of transcription, DNA-templated (GO:0006355);;	--	DELLA protein GAI GN=F10B6.34 OS=Arabidopsis thaliana (Mouse-ear cress) PE=1 SV=1	DELLA protein GN=L3b OS=Malus domestica (Apple) PE=2 SV=1	PREDICTED: LOW QUALITY PROTEIN: DELLA protein GAI-like [Malus domestica]	PREDICTED: Malus x domestica DELLA protein GAI-like (LOC103406741), mRNA
CS2_vs_CS1	gene.MD02G1042000	2.31649e-25	-2.30188	down	--	--	Biological Process: defense response (GO:0006952);; Biological Process: signal transduction (GO:0007165);; Molecular Function: ADP binding (GO:0043531);;	--	TMV resistance protein N GN=N OS=Nicotiana glutinosa (Tobacco) PE=1 SV=1	TIR-NBS-LRR type R protein 7 GN=R7 OS=Malus baccata PE=2 SV=1	PREDICTED: TMV resistance protein N-like [Malus domestica]	PREDICTED: Malus x domestica TMV resistance protein N-like (LOC103426621), mRNA
CS2_vs_CS1	gene.MD02G1045900	1.53651e-79	-1.71274	down	[IQR]	--	Molecular Function: oxidoreductase activity (GO:0016491);; Biological Process: oxidation-reduction process (GO:0055114);;	K13606|0.0|rcu:RCOM_1052710|short-chain dehydrogenase, putative (EC:1.1.1.47)	Probable chlorophyll(ide) b reductase NYC1, chloroplastic (Precursor) OS=Oryza sativa subsp. japonica (Rice) PE=1 SV=1	Uncharacterized protein GN=PRUPE_ppa004339mg OS=Prunus persica (Peach) PE=4 SV=1	PREDICTED: probable chlorophyll(ide) b reductase NYC1, chloroplastic [Pyrus x bretschneideri]	PREDICTED: Pyrus x bretschneideri probable chlorophyll(ide) b reductase NYC1, chloroplastic (LOC103960702), mRNA
CS2_vs_CS1	gene.MD02G1047700	2.37104e-10	-2.25915	down	--	--	--	--	--	Putative uncharacterized protein GN=VIT_11s0016g04000 OS=Vitis vinifera (Grape) PE=4 SV=1	hypothetical protein EUGRSUZ_C01044 [Eucalyptus grandis]	PREDICTED: Malus x domestica uncharacterized LOC108172401 (LOC108172401), ncRNA
CS2_vs_CS1	gene.MD02G1048700	6.1769e-19	-1.05267	down	--	--	Cellular Component: plasma membrane (GO:0005886);; Biological Process: tryptophan catabolic process (GO:0006569);; Biological Process: indoleacetic acid biosynthetic process (GO:0009684);; Cellular Component: anchored component of membrane (GO:0031225);;	--	Arabinogalactan peptide 16 (Precursor) GN=AGP16 OS=Arabidopsis thaliana (Mouse-ear cress) PE=1 SV=1	Predicted protein GN=POPTRDRAFT_578448 OS=Populus trichocarpa (Western balsam poplar) PE=4 SV=1	PREDICTED: arabinogalactan peptide 16-like [Pyrus x bretschneideri]	PREDICTED: Pyrus x bretschneideri arabinogalactan peptide 16-like (LOC103929446), mRNA
CS2_vs_CS1	gene.MD02G1049800	6.27333e-113	-2.42773	down	[C]	Energy production and conversion	Molecular Function: retinal dehydrogenase activity (GO:0001758);; Biological Process: oxidation-reduction process (GO:0055114);;	K12355|0.0|rcu:RCOM_1053330|aldehyde dehydrogenase, putative (EC:1.2.1.36)	Aldehyde dehydrogenase family 2 member C4 GN=MOB24.3 OS=Arabidopsis thaliana (Mouse-ear cress) PE=1 SV=2	Uncharacterized protein GN=PRUPE_ppa004555mg OS=Prunus persica (Peach) PE=4 SV=1	PREDICTED: aldehyde dehydrogenase family 2 member C4-like isoform X1 [Malus domestica]	PREDICTED: Malus x domestica aldehyde dehydrogenase family 2 member C4-like (LOC103406762), transcript variant X1, mRNA
CS2_vs_CS1	gene.MD02G1056600	7.12439e-19	3.37981	up	[R]	General function prediction only	Cellular Component: ubiquitin ligase complex (GO:0000151);; Molecular Function: ubiquitin-protein transferase activity (GO:0004842);; Biological Process: nucleoside metabolic process (GO:0009116);; Biological Process: protein ubiquitination (GO:0016567);;	--	Putative E3 ubiquitin-protein ligase LIN-1 GN=CERBERUS OS=Lotus japonicus (Lotus corniculatus var. japonicus) PE=2 SV=2	Uncharacterized protein GN=PRUPE_ppa000309mg OS=Prunus persica (Peach) PE=4 SV=1	PREDICTED: LOW QUALITY PROTEIN: putative E3 ubiquitin-protein ligase LIN-1 [Malus domestica]	PREDICTED: Malus x domestica putative E3 ubiquitin-protein ligase LIN-1 (LOC103449459), mRNA
CS2_vs_CS1	gene.MD02G1065400	6.43019e-69	-1.1389	down	--	--	--	--	--	Uncharacterized protein GN=PRUPE_ppa006997mg OS=Prunus persica (Peach) PE=4 SV=1	PREDICTED: uncharacterized protein LOC103426655 isoform X1 [Malus domestica]	PREDICTED: Malus x domestica uncharacterized LOC103418043 (LOC103418043), transcript variant X1, mRNA
CS2_vs_CS1	gene.MD02G1066200	1.25966e-05	1.16612	up	[S]	Function unknown	--	--	Receptor-like protein kinase HSL1 (Precursor) GN=HSL1 OS=Arabidopsis thaliana (Mouse-ear cress) PE=2 SV=1	Uncharacterized protein GN=PRUPE_ppa019571mg OS=Prunus persica (Peach) PE=4 SV=1	PREDICTED: receptor-like protein kinase HSL1 [Malus domestica]	PREDICTED: Malus x domestica receptor-like protein kinase 5 (LOC103426656), mRNA
CS2_vs_CS1	gene.MD02G1066500	1.21393e-56	1.04522	up	[G]	Carbohydrate transport and metabolism	Molecular Function: hexokinase activity (GO:0004396);; Molecular Function: ATP binding (GO:0005524);; Biological Process: glycolytic process (GO:0006096);; Biological Process: phosphorylation (GO:0016310);;	K00844|0.0|vvi:100242358|hypothetical protein LOC100242358	Hexokinase-1 GN=HXK1 OS=Spinacia oleracea (Spinach) PE=2 SV=1	Uncharacterized protein GN=PRUPE_ppa004637mg OS=Prunus persica (Peach) PE=4 SV=1	PREDICTED: hexokinase-1-like [Malus domestica]	PREDICTED: Malus x domestica hexokinase-1-like (LOC103449780), mRNA
CS2_vs_CS1	gene.MD02G1066900	1.48016e-10	-3.65847	down	--	--	--	--	--	Uncharacterized protein GN=PRUPE_ppa025288mg OS=Prunus persica (Peach) PE=4 SV=1	PREDICTED: protein IQ-DOMAIN 14-like [Pyrus x bretschneideri]	PREDICTED: Pyrus x bretschneideri protein IQ-DOMAIN 14-like (LOC103943914), mRNA
CS2_vs_CS1	gene.MD02G1068300	2.90504e-09	-1.47978	down	--	--	Molecular Function: acid phosphatase activity (GO:0003993);;	--	Acid phosphatase 1 (Precursor) GN=APS1 OS=Solanum lycopersicum (Tomato) PE=2 SV=1	Uncharacterized protein GN=PRUPE_ppa010268mg OS=Prunus persica (Peach) PE=4 SV=1	PREDICTED: acid phosphatase 1-like [Malus domestica]	PREDICTED: Malus x domestica acid phosphatase 1-like (LOC103449864), mRNA
CS2_vs_CS1	gene.MD02G1068800	3.67498e-15	-1.45206	down	[R]	General function prediction only	Molecular Function: metalloendopeptidase activity (GO:0004222);; Biological Process: proteolysis (GO:0006508);; Molecular Function: metal ion binding (GO:0046872);;	K01412|0.0|vvi:100266273|hypothetical protein LOC100266273	Mitochondrial-processing peptidase subunit alpha (Precursor) GN=MPP OS=Solanum tuberosum (Potato) PE=1 SV=1	Uncharacterized protein GN=PRUPE_ppa004446mg OS=Prunus persica (Peach) PE=4 SV=1	PREDICTED: mitochondrial-processing peptidase subunit alpha-like [Malus domestica]	PREDICTED: Malus x domestica mitochondrial-processing peptidase subunit alpha-like (LOC103418049), mRNA
CS2_vs_CS1	gene.MD02G1069700	1.46125e-07	-1.41181	down	--	--	--	--	Putative disease resistance protein RGA3 GN=RGA3 OS=Solanum bulbocastanum (Wild potato) PE=2 SV=2	Uncharacterized protein (Fragment) GN=PRUPE_ppa019910mg OS=Prunus persica (Peach) PE=4 SV=1	PREDICTED: putative disease resistance protein RGA3 [Malus domestica]	PREDICTED: Malus x domestica putative disease resistance protein RGA3 (LOC108170051), mRNA
CS2_vs_CS1	gene.MD02G1070400	0.00234098	1.16852	up	--	--	--	--	--	--	--	PREDICTED: Malus x domestica uncharacterized LOC103406803 (LOC103406803), transcript variant X4, ncRNA
CS2_vs_CS1	gene.MD02G1073100	1.63662e-25	1.19565	up	[R]	General function prediction only	Biological Process: methylation (GO:0032259);; Molecular Function: caffeoyl-CoA O-methyltransferase activity (GO:0042409);;	--	Probable caffeoyl-CoA O-methyltransferase At4g26220 GN=At4g26220 OS=Arabidopsis thaliana (Mouse-ear cress) PE=2 SV=1	Uncharacterized protein GN=PRUPE_ppa010674mg OS=Prunus persica (Peach) PE=4 SV=1	PREDICTED: probable caffeoyl-CoA O-methyltransferase At4g26220 [Malus domestica]	PREDICTED: Malus x domestica probable caffeoyl-CoA O-methyltransferase At4g26220 (LOC103426660), transcript variant X3, mRNA
CS2_vs_CS1	gene.MD02G1073500	3.56764e-17	-1.11248	down	--	--	--	--	--	Uncharacterized protein (Fragment) GN=PRUPE_ppa025861mg OS=Prunus persica (Peach) PE=4 SV=1	PREDICTED: filaggrin isoform X2 [Malus domestica]	PREDICTED: Malus x domestica filaggrin (LOC103400755), transcript variant X2, mRNA
CS2_vs_CS1	gene.MD02G1076000	0.000708738	1.02787	up	--	--	--	--	--	Uncharacterized protein (Fragment) GN=PRUPE_ppa025028mg OS=Prunus persica (Peach) PE=4 SV=1	PREDICTED: protein EFFECTOR OF TRANSCRIPTION 2-like [Malus domestica]	PREDICTED: Malus x domestica protein EFFECTOR OF TRANSCRIPTION 2-like (LOC103406805), mRNA
CS2_vs_CS1	gene.MD02G1076800	6.54448e-08	1.96918	up	[F]	Nucleotide transport and metabolism	Molecular Function: cytidine deaminase activity (GO:0004126);; Molecular Function: zinc ion binding (GO:0008270);; Biological Process: cytidine deamination (GO:0009972);;	K01489|1e-115|pop:POPTR_1080879|cytidine deaminase (EC:3.5.4.5)	--	Uncharacterized protein GN=PRUPE_ppa009163mg OS=Prunus persica (Peach) PE=4 SV=1	PREDICTED: cytidine deaminase 1-like [Malus domestica]	PREDICTED: Malus x domestica cytidine deaminase 1-like (LOC103406806), mRNA
CS2_vs_CS1	gene.MD02G1080400	6.6727e-09	-2.00866	down	--	--	--	--	--	Uncharacterized protein GN=PRUPE_ppa015296mg OS=Prunus persica (Peach) PE=4 SV=1	PREDICTED: uncharacterized protein LOC103951864 [Pyrus x bretschneideri]	PREDICTED: Pyrus x bretschneideri uncharacterized LOC103951864 (LOC103951864), mRNA
CS2_vs_CS1	gene.MD02G1085100	1.71849e-05	1.0261	up	--	--	--	--	--	Uncharacterized protein GN=PRUPE_ppa011170mg OS=Prunus persica (Peach) PE=4 SV=1	PREDICTED: cleavage and polyadenylation specificity factor subunit 5-like [Pyrus x bretschneideri]	PREDICTED: Pyrus x bretschneideri cleavage and polyadenylation specificity factor subunit 5-like (LOC103951898), mRNA
CS2_vs_CS1	gene.MD02G1091500	0	2.67984	up	--	--	--	--	Salicylic acid-binding protein 2 GN=SABP2 OS=Nicotiana tabacum (Common tobacco) PE=1 SV=1	Uncharacterized protein (Fragment) GN=PRUPE_ppa015635mg OS=Prunus persica (Peach) PE=4 SV=1	PREDICTED: salicylic acid-binding protein 2-like [Malus domestica]	PREDICTED: Malus x domestica salicylic acid-binding protein 2-like (LOC103451079), mRNA
CS2_vs_CS1	gene.MD02G1091800	9.19185e-123	-1.25779	down	--	--	Biological Process: proteolysis (GO:0006508);; Molecular Function: cysteine-type peptidase activity (GO:0008234);;	K01366|0.0|vvi:100244107|hypothetical protein LOC100244107	Thiol protease aleurain-like (Precursor) GN=At3g45310 OS=Arabidopsis thaliana (Mouse-ear cress) PE=2 SV=1	Uncharacterized protein GN=PRUPE_ppa006924mg OS=Prunus persica (Peach) PE=4 SV=1	PREDICTED: thiol protease aleurain-like [Malus domestica]	PREDICTED: Malus x domestica thiol protease aleurain-like (LOC103451125), mRNA
CS2_vs_CS1	gene.MD02G1093500	2.81552e-18	1.10937	up	[O]	Posttranslational modification, protein turnover, chaperones	Biological Process: RNA splicing, via endonucleolytic cleavage and ligation (GO:0000394);; Molecular Function: serine-type endopeptidase activity (GO:0004252);; Cellular Component: extracellular region (GO:0005576);; Cellular Component: Golgi apparatus (GO:0005794);; Biological Process: proteolysis (GO:0006508);; Biological Process: methionine biosynthetic process (GO:0009086);; Cellular Componen…	--	Subtilisin-like protease (Precursor) GN=K8K14.8 OS=Arabidopsis thaliana (Mouse-ear cress) PE=1 SV=1	Uncharacterized protein GN=PRUPE_ppa001798mg OS=Prunus persica (Peach) PE=4 SV=1	PREDICTED: subtilisin-like protease SBT1.8 [Malus domestica]	PREDICTED: Malus x domestica subtilisin-like protease SBT1.8 (LOC103451183), mRNA
CS2_vs_CS1	gene.MD02G1095100	1.10238e-06	-1.23912	down	[R]	General function prediction only	Cellular Component: membrane (GO:0016020);;	--	--	Uncharacterized protein GN=PRUPE_ppa001864mg OS=Prunus persica (Peach) PE=4 SV=1	PREDICTED: inter-alpha-trypsin inhibitor heavy chain H3 [Malus domestica]	PREDICTED: Malus x domestica inter-alpha-trypsin inhibitor heavy chain H3 (LOC103451282), mRNA
CS2_vs_CS1	gene.MD02G1096300	1.26418e-132	-2.23101	down	--	--	--	--	--	Uncharacterized protein GN=PRUPE_ppa010520mg OS=Prunus persica (Peach) PE=4 SV=1	PREDICTED: uncharacterized protein LOC103406845 [Malus domestica]	PREDICTED: Malus x domestica uncharacterized LOC103406845 (LOC103406845), mRNA
CS2_vs_CS1	gene.MD02G1104600	5.41685e-06	-1.18889	down	--	--	Molecular Function: enzyme inhibitor activity (GO:0004857);; Cellular Component: extracellular region (GO:0005576);; Cellular Component: cell wall (GO:0005618);; Molecular Function: pectinesterase activity (GO:0030599);; Biological Process: cell wall modification (GO:0042545);; Biological Process: negative regulation of catalytic activity (GO:0043086);; Molecular Function: aspartyl esterase activ…	K01051|0.0|pop:POPTR_589361|pectinesterase family protein (EC:3.1.1.11)	Pectinesterase PPE8B (Precursor) OS=Prunus persica (Peach) PE=2 SV=1	Pectinesterase GN=PcPME4 OS=Pyrus communis (Pear) PE=2 SV=1	PREDICTED: pectinesterase/pectinesterase inhibitor PPE8B [Pyrus x bretschneideri]	PREDICTED: Pyrus x bretschneideri pectinesterase/pectinesterase inhibitor PPE8B (LOC103959116), mRNA
CS2_vs_CS1	gene.MD02G1105700	1.26204e-31	2.22825	up	--	--	--	--	--	Uncharacterized protein GN=PRUPE_ppa011348mg OS=Prunus persica (Peach) PE=4 SV=1	PREDICTED: E3 ubiquitin-protein ligase ATL4-like [Malus domestica]	PREDICTED: Malus x domestica E3 ubiquitin-protein ligase ATL4-like (LOC103418211), mRNA
CS2_vs_CS1	gene.MD02G1105900	5.70107e-06	1.92239	up	--	--	--	K13464|6e-39|pop:POPTR_819435|hypothetical protein	Protein TIFY 3B GN=F22D1.70 OS=Arabidopsis thaliana (Mouse-ear cress) PE=1 SV=1	Uncharacterized protein GN=PRUPE_ppa011303mg OS=Prunus persica (Peach) PE=4 SV=1	PREDICTED: protein TIFY 3-like [Malus domestica]	PREDICTED: Malus x domestica protein TIFY 3-like (LOC103454215), mRNA
CS2_vs_CS1	gene.MD02G1107800	0.000128798	1.19355	up	--	--	Biological Process: metabolic process (GO:0008152);; Molecular Function: transferase activity, transferring acyl groups other than amino-acyl groups (GO:0016747);;	K14457|3e-175|vvi:100258437|hypothetical protein LOC100258437	Diacylglycerol O-acyltransferase 2 GN=DGAT2 OS=Arabidopsis thaliana (Mouse-ear cress) PE=2 SV=1	Uncharacterized protein GN=PRUPE_ppa008682mg OS=Prunus persica (Peach) PE=4 SV=1	PREDICTED: diacylglycerol O-acyltransferase 2-like [Malus domestica]	PREDICTED: Malus x domestica diacylglycerol O-acyltransferase 2-like (LOC103454359), mRNA
CS2_vs_CS1	gene.MD02G1108700	2.64829e-09	-2.34468	down	[I]	Lipid transport and metabolism	Molecular Function: hydroxymethylglutaryl-CoA reductase (NADPH) activity (GO:0004420);; Biological Process: isoprenoid biosynthetic process (GO:0008299);; Biological Process: coenzyme A metabolic process (GO:0015936);; Cellular Component: integral component of membrane (GO:0016021);; Molecular Function: NADP binding (GO:0050661);; Biological Process: oxidation-reduction process (GO:0055114);;	K00021|0.0|rcu:RCOM_1602200|hmg-CoA reductase, putative (EC:1.1.1.34)	3-hydroxy-3-methylglutaryl-coenzyme A reductase 1 GN=HMG1 OS=Solanum tuberosum (Potato) PE=2 SV=1	3-hydroxy-3-methylglutaryl-CoA reductase GN=HMG2 OS=Malus domestica (Apple) PE=2 SV=1	PREDICTED: LOW QUALITY PROTEIN: 3-hydroxy-3-methylglutaryl-coenzyme A reductase 1-like, partial [Malus domestica]	PREDICTED: Malus x domestica 3-hydroxy-3-methylglutaryl-coenzyme A reductase 1-like (LOC103455059), partial mRNA
CS2_vs_CS1	gene.MD02G1110700	8.01889e-13	-1.5319	down	--	--	Cellular Component: intracellular (GO:0005622);; Molecular Function: zinc ion binding (GO:0008270);;	--	Probable salt tolerance-like protein At1g78600 GN=At1g78600 OS=Arabidopsis thaliana (Mouse-ear cress) PE=1 SV=2	COL domain class transcription factor GN=COL5 OS=Malus domestica (Apple) PE=2 SV=1	PREDICTED: B-box zinc finger protein 19-like [Malus domestica]	PREDICTED: Malus x domestica B-box zinc finger protein 19-like (LOC103436121), mRNA
CS2_vs_CS1	gene.MD02G1113400	6.70355e-07	1.1527	up	[O]	Posttranslational modification, protein turnover, chaperones	Molecular Function: metal ion binding (GO:0046872);;	--	RING-H2 finger protein ATL8 GN=ATL8 OS=Arabidopsis thaliana (Mouse-ear cress) PE=2 SV=2	Uncharacterized protein GN=PRUPE_ppa011201mg OS=Prunus persica (Peach) PE=4 SV=1	PREDICTED: RING-H2 finger protein ATL80-like [Malus domestica]	PREDICTED: Malus x domestica RING-H2 finger protein ATL80-like (LOC103454481), mRNA
CS2_vs_CS1	gene.MD02G1121700	4.11007e-31	2.02429	up	--	--	Cellular Component: integral component of membrane (GO:0016021);;	--	Lysine histidine transporter-like 8 GN=AATL1 OS=Arabidopsis thaliana (Mouse-ear cress) PE=1 SV=1	Putative uncharacterized protein GN=VIT_00s0302g00020 OS=Vitis vinifera (Grape) PE=4 SV=1	PREDICTED: lysine histidine transporter-like 8 [Malus domestica]	PREDICTED: Malus x domestica lysine histidine transporter-like 8 (LOC103455789), mRNA
CS2_vs_CS1	gene.MD02G1122100	8.75563e-19	1.26273	up	--	--	--	--	--	Uncharacterized protein GN=PRUPE_ppa020636mg OS=Prunus persica (Peach) PE=4 SV=1	PREDICTED: F-box protein SKIP23-like [Malus domestica]	PREDICTED: Malus x domestica F-box protein SKIP23-like (LOC103426778), mRNA
CS2_vs_CS1	gene.MD02G1122200	2.51996e-13	1.49844	up	--	--	Cellular Component: cytoplasm (GO:0005737);;	--	--	Uncharacterized protein GN=PRUPE_ppa011645mg OS=Prunus persica (Peach) PE=4 SV=1	PREDICTED: ganglioside-induced differentiation-associated protein 2 [Malus domestica]	PREDICTED: Malus x domestica ganglioside-induced differentiation-associated protein 2-like (LOC103407039), mRNA
CS2_vs_CS1	gene.MD02G1122400	1.77351e-25	Inf	up	[P]	Inorganic ion transport and metabolism	--	--	Rhodanese-like domain-containing protein 15, chloroplastic (Precursor) OS=Arabidopsis thaliana (Mouse-ear cress) PE=2 SV=1	Uncharacterized protein GN=PRUPE_ppa012088mg OS=Prunus persica (Peach) PE=4 SV=1	PREDICTED: thiosulfate sulfurtransferase 16, chloroplastic isoform X2 [Malus domestica]	PREDICTED: Malus x domestica thiosulfate sulfurtransferase 16, chloroplastic (LOC103455824), transcript variant X2, mRNA
CS2_vs_CS1	gene.MD02G1123500	2.32906e-24	-1.85304	down	--	--	Cellular Component: plasma membrane (GO:0005886);; Molecular Function: peptide-methionine (R)-S-oxide reductase activity (GO:0033743);; Biological Process: oxidation-reduction process (GO:0055114);;	--	--	Uncharacterized protein GN=PRUPE_ppa013035mg OS=Prunus persica (Peach) PE=4 SV=1	PREDICTED: uncharacterized protein LOC103407042 [Malus domestica]	PREDICTED: Malus x domestica uncharacterized LOC103407042 (LOC103407042), mRNA
CS2_vs_CS1	gene.MD02G1125700	4.45032e-12	1.18436	up	[K]	Transcription	Molecular Function: transferase activity (GO:0016740);;	K03006|2e-49|vvi:100264310|similar to NRPB1 (RNA POLYMERASE II LARGE SUBUNIT)	DNA-directed RNA polymerase II subunit RPB1 GN=F4B14.70 OS=Arabidopsis thaliana (Mouse-ear cress) PE=1 SV=3	DNA-directed RNA polymerase OS=Hordeum vulgare var. distichum (Two-rowed barley) PE=3 SV=1	PREDICTED: DNA-directed RNA polymerase II subunit 1 [Pyrus x bretschneideri]	PREDICTED: Pyrus x bretschneideri DNA-directed RNA polymerase II subunit 1-like (LOC103953433), mRNA
CS2_vs_CS1	gene.MD02G1127300	4.66655e-09	-3.22967	down	--	--	--	--	F-box protein At4g35930 GN=At4g35930 OS=Arabidopsis thaliana (Mouse-ear cress) PE=2 SV=1	Uncharacterized protein GN=PRUPE_ppa010075mg OS=Prunus persica (Peach) PE=4 SV=1	PREDICTED: F-box protein At4g35930-like [Malus domestica]	PREDICTED: Malus x domestica F-box protein At4g35930-like (LOC103456056), transcript variant X3, mRNA
CS2_vs_CS1	gene.MD02G1128300	1.13833e-30	-1.38251	down	[T]	Signal transduction mechanisms	--	--	Histidine kinase 1 GN=AHK1 OS=Arabidopsis thaliana (Mouse-ear cress) PE=1 SV=2	Uncharacterized protein GN=PRUPE_ppa000366mg OS=Prunus persica (Peach) PE=4 SV=1	PREDICTED: LOW QUALITY PROTEIN: histidine kinase 1-like [Malus domestica]	PREDICTED: Malus x domestica histidine kinase 1-like (LOC103456117), mRNA
CS2_vs_CS1	gene.MD02G1128700	9.45001e-269	2.15488	up	[G]	Carbohydrate transport and metabolism	--	--	--	Uncharacterized protein GN=PRUPE_ppa021513mg OS=Prunus persica (Peach) PE=4 SV=1	PREDICTED: alpha-mannosidase-like [Malus domestica]	PREDICTED: Malus x domestica alpha-mannosidase-like (LOC103418267), mRNA
CS2_vs_CS1	gene.MD02G1129400	0.000686985	-1.31921	down	--	--	--	--	MLO-like protein 4 GN=MLO4 OS=Arabidopsis thaliana (Mouse-ear cress) PE=2 SV=2	Uncharacterized protein GN=PRUPE_ppa024476mg OS=Prunus persica (Peach) PE=4 SV=1	PREDICTED: MLO-like protein 4 [Malus domestica]	PREDICTED: Malus x domestica MLO-like protein 4 (LOC103426784), mRNA
CS2_vs_CS1	gene.MD02G1129900	1.0475e-29	1.53397	up	--	--	Biological Process: transmembrane transport (GO:0055085);;	--	Oligopeptide transporter 7 GN=OPT7 OS=Arabidopsis thaliana (Mouse-ear cress) PE=2 SV=1	Uncharacterized protein GN=PRUPE_ppa002122mg OS=Prunus persica (Peach) PE=4 SV=1	PREDICTED: oligopeptide transporter 7-like [Malus domestica]	PREDICTED: Malus x domestica oligopeptide transporter 7-like (LOC103456207), mRNA
CS2_vs_CS1	gene.MD02G1132200	3.0662e-199	2.8067	up	[R]	General function prediction only	Biological Process: flavonoid biosynthetic process (GO:0009813);; Molecular Function: oxidoreductase activity, acting on single donors with incorporation of molecular oxygen, incorporation of two atoms of oxygen (GO:0016702);; Molecular Function: L-ascorbic acid binding (GO:0031418);; Molecular Function: naringenin 3-dioxygenase activity (GO:0045486);; Molecular Function: metal ion binding (GO:00…	K00475|0.0|vvi:100233079|F3H, FHT	Naringenin,2-oxoglutarate 3-dioxygenase OS=Malus domestica (Apple) PE=2 SV=1	Flavanon 3 beta-hydroxylase OS=Malus domestica (Apple) PE=2 SV=1	flavanon 3 beta-hydroxylase [Malus domestica]	Malus x domestica cultivar Weirouge flavanon 3 beta-hydroxylase mRNA, complete cds
CS2_vs_CS1	gene.MD02G1132400	4.99312e-06	-1.10669	down	--	--	--	--	Snakin-2 (Precursor) GN=SN2 OS=Solanum tuberosum (Potato) PE=1 SV=1	Uncharacterized protein GN=PRUPE_ppa013480mg OS=Prunus persica (Peach) PE=4 SV=1	PREDICTED: snakin-2-like [Malus domestica]	PREDICTED: Malus x domestica snakin-2-like (LOC103400037), mRNA
CS2_vs_CS1	gene.MD02G1136300	2.90641e-06	-2.29532	down	--	--	Molecular Function: kinase activity (GO:0016301);; Biological Process: phosphorylation (GO:0016310);; Molecular Function: 2-alkenal reductase [NAD(P)] activity (GO:0032440);; Biological Process: oxidation-reduction process (GO:0055114);;	--	LRR receptor-like serine/threonine-protein kinase FLS2 (Precursor) GN=FLS2 OS=Arabidopsis thaliana (Mouse-ear cress) PE=1 SV=1	Predicted protein GN=POPTRDRAFT_655398 OS=Populus trichocarpa (Western balsam poplar) PE=4 SV=1	PREDICTED: probable leucine-rich repeat receptor-like protein kinase At1g35710 [Pyrus x bretschneideri]	PREDICTED: Malus x domestica probable leucine-rich repeat receptor-like protein kinase At1g35710 (LOC103400973), mRNA
CS2_vs_CS1	gene.MD02G1139700	2.10264e-48	2.91063	up	--	--	--	--	Dehydrin Xero 2 GN=F24M12.10 OS=Arabidopsis thaliana (Mouse-ear cress) PE=2 SV=1	Dehydrin 1 GN=DHN1 OS=Malus domestica (Apple) PE=2 SV=1	dehydrin 10 [Malus domestica]	PREDICTED: Malus x domestica dehydrin DHN3-like (LOC103401135), mRNA
CS2_vs_CS1	gene.MD02G1140000	1.47736e-269	4.37888	up	--	--	Biological Process: response to stress (GO:0006950);; Biological Process: response to water (GO:0009415);;	--	Dehydrin ERD10 OS=Arabidopsis thaliana (Mouse-ear cress) PE=1 SV=1	Dehydrin 2 GN=DHN2 OS=Malus domestica (Apple) PE=2 SV=1	PREDICTED: water stress-inducible protein Rab21-like isoform X1 [Malus domestica]	PREDICTED: Malus x domestica water stress-inducible protein Rab21-like (LOC103401165), transcript variant X2, mRNA
CS2_vs_CS1	gene.MD02G1140600	4.43111e-71	2.22111	up	--	--	Molecular Function: transcription factor activity, sequence-specific DNA binding (GO:0003700);; Biological Process: regulation of transcription, DNA-templated (GO:0006355);; Molecular Function: sequence-specific DNA binding (GO:0043565);;	--	Ocs element-binding factor 1 GN=OBF1 OS=Zea mays (Maize) PE=2 SV=2	BZIP domain class transcription factor GN=BZIP14 OS=Malus domestica (Apple) PE=2 SV=1	BZIP domain class transcription factor [Malus domestica]	Malus x domestica BZIP domain class transcription factor (BZIP14) mRNA, complete cds
CS2_vs_CS1	gene.MD02G1140800	0.00112468	-1.13154	down	--	--	--	--	--	Uncharacterized protein (Fragment) GN=PRUPE_ppa023962mg OS=Prunus persica (Peach) PE=4 SV=1	hypothetical protein PRUPE_ppa023962mg, partial [Prunus persica]	Prunus persica hypothetical protein (PRUPE_ppa023962mg) mRNA, partial cds
CS2_vs_CS1	gene.MD02G1141400	2.99626e-194	-4.48397	down	[O]	Posttranslational modification, protein turnover, chaperones	--	--	ATP-dependent zinc metalloprotease FTSH 8, chloroplastic (Precursor) OS=Arabidopsis thaliana (Mouse-ear cress) PE=1 SV=1	Uncharacterized protein GN=PRUPE_ppa004546mg OS=Prunus persica (Peach) PE=4 SV=1	PREDICTED: AAA-ATPase At2g18193-like [Malus domestica]	PREDICTED: Malus x domestica AAA-ATPase At2g18193-like (LOC103401229), mRNA
CS2_vs_CS1	gene.MD02G1143700	0.000240345	1.3839	up	[G]	Carbohydrate transport and metabolism	Molecular Function: hydrolase activity, hydrolyzing O-glycosyl compounds (GO:0004553);; Biological Process: carbohydrate metabolic process (GO:0005975);;	--	Mannan endo-1,4-beta-mannosidase 7 (Precursor) GN=MAN7 OS=Arabidopsis thaliana (Mouse-ear cress) PE=2 SV=1	Endo-1,4-beta-mannosidase protein 2 OS=Prunus persica (Peach) PE=2 SV=1	PREDICTED: mannan endo-1,4-beta-mannosidase 7-like [Malus domestica]	PREDICTED: Malus x domestica mannan endo-1,4-beta-mannosidase 7-like (LOC103401285), mRNA
CS2_vs_CS1	gene.MD02G1143800	8.2581e-09	1.23223	up	[R]	General function prediction only	Molecular Function: RNA binding (GO:0003723);; Molecular Function: GTP binding (GO:0005525);; Cellular Component: intracellular (GO:0005622);; Biological Process: embryo development ending in seed dormancy (GO:0009793);; Biological Process: iron-sulfur cluster assembly (GO:0016226);; Biological Process: isopentenyl diphosphate biosynthetic process, methylerythritol 4-phosphate pathway (GO:0019288…	K03595|2e-175|vvi:100265087|hypothetical protein LOC100265087	GTP-binding protein ERG GN=ERG OS=Arabidopsis thaliana (Mouse-ear cress) PE=1 SV=2	Uncharacterized protein GN=PRUPE_ppa007338mg OS=Prunus persica (Peach) PE=4 SV=1	PREDICTED: GTPase Era-like [Malus domestica]	PREDICTED: Malus x domestica GTPase Era-like (LOC103402282), mRNA
CS2_vs_CS1	gene.MD02G1148700	1.20481e-109	1.99494	up	--	--	--	--	--	Uncharacterized protein GN=PRUPE_ppa022555mg OS=Prunus persica (Peach) PE=4 SV=1	PREDICTED: uncharacterized protein LOC103426803 [Malus domestica]	PREDICTED: Malus x domestica uncharacterized LOC103426803 (LOC103426803), mRNA
CS2_vs_CS1	gene.MD02G1150700	9.625e-46	1.21669	up	--	--	--	--	--	Predicted protein GN=POPTRDRAFT_595374 OS=Populus trichocarpa (Western balsam poplar) PE=4 SV=1	PREDICTED: uncharacterized protein LOC103418311 [Malus domestica]	PREDICTED: Malus x domestica uncharacterized LOC103418311 (LOC103418311), mRNA
CS2_vs_CS1	gene.MD02G1151000	2.66893e-28	1.8011	up	[GEPR]	--	Cellular Component: integral component of membrane (GO:0016021);; Molecular Function: substrate-specific transmembrane transporter activity (GO:0022891);; Biological Process: transmembrane transport (GO:0055085);;	--	Probable polyol transporter 6 GN=PLT6 OS=Arabidopsis thaliana (Mouse-ear cress) PE=2 SV=2	Uncharacterized protein GN=PRUPE_ppa017052mg OS=Prunus persica (Peach) PE=4 SV=1	PREDICTED: probable polyol transporter 6 [Malus domestica]	PREDICTED: Malus x domestica probable polyol transporter 6 (LOC103401649), mRNA
CS2_vs_CS1	gene.MD02G1153500	1.67755e-68	1.18227	up	--	--	Biological Process: metabolic process (GO:0008152);; Molecular Function: transferase activity, transferring hexosyl groups (GO:0016758);;	--	Anthocyanidin 3-O-glucosyltransferase 5 GN=GT5 OS=Manihot esculenta (Cassava) PE=1 SV=1	Uncharacterized protein GN=PRUPE_ppa005112mg OS=Prunus persica (Peach) PE=4 SV=1	PREDICTED: anthocyanidin 3-O-glucosyltransferase 5-like [Malus domestica]	PREDICTED: Malus x domestica anthocyanidin 3-O-glucosyltransferase 5-like (LOC103401840), mRNA
CS2_vs_CS1	gene.MD02G1154400	4.96712e-66	1.14334	up	[H]	Coenzyme transport and metabolism	Biological Process: isoprenoid biosynthetic process (GO:0008299);; Molecular Function: transferase activity (GO:0016740);;	K13789|4e-174|pop:POPTR_741258|hypothetical protein	Geranylgeranyl pyrophosphate synthase, chloroplastic (Precursor) GN=GGPS OS=Hevea brasiliensis (Para rubber tree) PE=1 SV=1	Uncharacterized protein GN=PRUPE_ppa007368mg OS=Prunus persica (Peach) PE=4 SV=1	PREDICTED: geranylgeranyl pyrophosphate synthase, chloroplastic-like [Malus domestica]	PREDICTED: Malus x domestica geranylgeranyl pyrophosphate synthase, chloroplastic-like (LOC103418313), mRNA
CS2_vs_CS1	gene.MD02G1155100	8.9904e-06	-1.24157	down	--	--	Cellular Component: integral component of membrane (GO:0016021);;	--	--	Uncharacterized protein GN=PRUPE_ppa008998mg OS=Prunus persica (Peach) PE=4 SV=1	PREDICTED: elongation of fatty acids protein 3-like [Malus domestica]	PREDICTED: Malus x domestica elongation of fatty acids protein 3-like (LOC103402413), mRNA
CS2_vs_CS1	gene.MD02G1159200	2.84279e-17	-1.3568	down	--	--	--	--	--	Uncharacterized protein GN=PRUPE_ppa012046mg OS=Prunus persica (Peach) PE=4 SV=1	PREDICTED: uncharacterized protein LOC103933933 [Pyrus x bretschneideri]	PREDICTED: Pyrus x bretschneideri uncharacterized LOC103933936 (LOC103933936), mRNA
CS2_vs_CS1	gene.MD02G1163100	0	-5.39581	down	[R]	General function prediction only	--	--	Methylesterase 10 GN=MES10 OS=Arabidopsis thaliana (Mouse-ear cress) PE=2 SV=1	Uncharacterized protein GN=PRUPE_ppa010154mg OS=Prunus persica (Peach) PE=4 SV=1	PREDICTED: methylesterase 10 [Malus domestica]	PREDICTED: Malus x domestica methylesterase 10 (LOC103402642), mRNA
CS2_vs_CS1	gene.MD02G1166900	1.31352e-05	-2.33156	down	--	--	--	--	LOB domain-containing protein 36 GN=MUD21.13 OS=Arabidopsis thaliana (Mouse-ear cress) PE=2 SV=1	Uncharacterized protein GN=PRUPE_ppa026393mg OS=Prunus persica (Peach) PE=4 SV=1	PREDICTED: LOB domain-containing protein 36-like [Malus domestica]	PREDICTED: Malus x domestica LOB domain-containing protein 36-like (LOC103402811), mRNA
CS2_vs_CS1	gene.MD02G1170500	1.27989e-18	-1.29382	down	--	--	--	--	Uncharacterized membrane protein At3g27390 GN=At3g27390 OS=Arabidopsis thaliana (Mouse-ear cress) PE=1 SV=2	Uncharacterized protein GN=PRUPE_ppa003356mg OS=Prunus persica (Peach) PE=4 SV=1	PREDICTED: uncharacterized membrane protein At3g27390-like [Malus domestica]	PREDICTED: Malus x domestica uncharacterized membrane protein At3g27390-like (LOC103402941), mRNA
CS2_vs_CS1	gene.MD02G1176100	0.000704552	-1.02573	down	[R]	General function prediction only	Molecular Function: adenyl nucleotide binding (GO:0030554);; Biological Process: cell redox homeostasis (GO:0045454);;	--	CBS domain-containing protein CBSX1, chloroplastic (Precursor) OS=Arabidopsis thaliana (Mouse-ear cress) PE=1 SV=2	JHL03K20.5 protein GN=JHL03K20.5 OS=Jatropha curcas PE=4 SV=1	PREDICTED: CBS domain-containing protein CBSX1, chloroplastic-like [Malus domestica]	PREDICTED: Malus x domestica CBS domain-containing protein CBSX1, chloroplastic-like (LOC103403253), mRNA
CS2_vs_CS1	gene.MD02G1176600	8.44275e-49	-1.83812	down	[RTKL]	--	Molecular Function: protein kinase activity (GO:0004672);; Molecular Function: ATP binding (GO:0005524);; Cellular Component: plasma membrane (GO:0005886);; Biological Process: protein phosphorylation (GO:0006468);;	--	Probable inactive receptor kinase At5g67200 (Precursor) GN=At5g67200 OS=Arabidopsis thaliana (Mouse-ear cress) PE=1 SV=1	Putative receptor kinase GN=DIPM1 OS=Malus domestica (Apple) PE=2 SV=1	PREDICTED: probable inactive receptor kinase At5g67200 [Malus domestica]	PREDICTED: Malus x domestica probable inactive receptor kinase At5g67200 (LOC103403305), mRNA
CS2_vs_CS1	gene.MD02G1177700	7.35655e-241	-2.06622	down	--	--	Biological Process: proteolysis (GO:0006508);; Molecular Function: cysteine-type peptidase activity (GO:0008234);; Molecular Function: 2-alkenal reductase [NAD(P)] activity (GO:0032440);; Biological Process: oxidation-reduction process (GO:0055114);;	--	Cysteine proteinase RD21a (Precursor) GN=RD21A OS=Arabidopsis thaliana (Mouse-ear cress) PE=1 SV=1	Uncharacterized protein GN=PRUPE_ppa007467mg OS=Prunus persica (Peach) PE=4 SV=1	PREDICTED: cysteine proteinase COT44-like [Malus domestica]	PREDICTED: Malus x domestica cysteine proteinase COT44-like (LOC103403352), mRNA
CS2_vs_CS1	gene.MD02G1178300	6.23304e-05	1.62285	up	[R]	General function prediction only	Molecular Function: signal transducer activity (GO:0004871);; Molecular Function: GTP binding (GO:0005525);; Cellular Component: intracellular (GO:0005622);; Biological Process: small GTPase mediated signal transduction (GO:0007264);;	--	ADP-ribosylation factor 2 GN=OJ1119_H02.17 OS=Oryza sativa subsp. japonica (Rice) PE=2 SV=2	Uncharacterized protein GN=PRUPE_ppa012138mg OS=Prunus persica (Peach) PE=4 SV=1	PREDICTED: ADP-ribosylation factor 2-like isoform X1 [Malus domestica]	PREDICTED: Malus x domestica ADP-ribosylation factor 2-like (LOC103453715), transcript variant X1, mRNA
CS2_vs_CS1	gene.MD02G1179100	2.12693e-132	-1.23972	down	[P]	Inorganic ion transport and metabolism	--	--	Probable cadmium/zinc-transporting ATPase HMA1, chloroplastic (Precursor) GN=HMA1 OS=Arabidopsis thaliana (Mouse-ear cress) PE=1 SV=2	Uncharacterized protein GN=PRUPE_ppa001453mg OS=Prunus persica (Peach) PE=4 SV=1	PREDICTED: LOW QUALITY PROTEIN: probable cadmium/zinc-transporting ATPase HMA1, chloroplastic [Malus domestica]	PREDICTED: Malus x domestica probable cadmium/zinc-transporting ATPase HMA1, chloroplastic (LOC103453726), mRNA
CS2_vs_CS1	gene.MD02G1179200	9.43021e-06	1.09842	up	--	--	--	K11339|3e-179|rcu:RCOM_1153870|chromatin binding protein, putative	--	Uncharacterized protein GN=PRUPE_ppa007902mg OS=Prunus persica (Peach) PE=4 SV=1	PREDICTED: protein MRG1 isoform X3 [Malus domestica]	PREDICTED: Malus x domestica protein MRG1 (LOC103453727), transcript variant X3, mRNA
CS2_vs_CS1	gene.MD02G1179900	0.000100889	-1.42903	down	--	--	--	--	--	Uncharacterized protein GN=PRUPE_ppa013887mg OS=Prunus persica (Peach) PE=4 SV=1	PREDICTED: uncharacterized protein LOC103957323 [Pyrus x bretschneideri]	PREDICTED: Pyrus x bretschneideri uncharacterized LOC103957323 (LOC103957323), transcript variant X2, mRNA
CS2_vs_CS1	gene.MD02G1181000	3.41381e-16	-4.56287	down	--	--	--	--	--	--	--	PREDICTED: Pyrus x bretschneideri lysine-rich arabinogalactan protein 18-like (LOC103957450), mRNA
CS2_vs_CS1	gene.MD02G1182100	2.16194e-06	-1.03899	down	--	--	Molecular Function: procollagen-proline 4-dioxygenase activity (GO:0004656);; Molecular Function: iron ion binding (GO:0005506);; Molecular Function: L-ascorbic acid binding (GO:0031418);; Biological Process: oxidation-reduction process (GO:0055114);;	K00472|3e-147|rcu:RCOM_0396560|prolyl 4-hydroxylase alpha subunit, putative (EC:1.14.11.2)	--	Uncharacterized protein GN=PRUPE_ppa009459mg OS=Prunus persica (Peach) PE=4 SV=1	PREDICTED: probable prolyl 4-hydroxylase 9 [Malus domestica]	PREDICTED: Malus x domestica probable prolyl 4-hydroxylase 9 (LOC103403818), mRNA
CS2_vs_CS1	gene.MD02G1182500	9.35412e-53	2.68784	up	--	--	--	--	BTB/POZ domain-containing protein At5g67385 GN=At5g67385 OS=Arabidopsis thaliana (Mouse-ear cress) PE=2 SV=2	Uncharacterized protein GN=PRUPE_ppa002888mg OS=Prunus persica (Peach) PE=4 SV=1	PREDICTED: BTB/POZ domain-containing protein At5g67385-like [Malus domestica]	PREDICTED: Malus x domestica BTB/POZ domain-containing protein At5g67385-like (LOC103418366), mRNA
CS2_vs_CS1	gene.MD02G1183500	4.74678e-13	1.80259	up	--	--	--	--	BTB/POZ domain-containing protein NPY2 GN=NPY2 OS=Arabidopsis thaliana (Mouse-ear cress) PE=2 SV=1	BZIP domain class transcription factor GN=BZIP2 OS=Malus domestica (Apple) PE=2 SV=1	PREDICTED: BTB/POZ domain-containing protein NPY2-like [Malus domestica]	PREDICTED: Malus x domestica BTB/POZ domain-containing protein NPY2-like (LOC103403957), transcript variant X2, mRNA
CS2_vs_CS1	gene.MD02G1184400	2.30505e-32	2.03299	up	--	--	Molecular Function: transcription cofactor activity (GO:0003712);; Molecular Function: histone acetyltransferase activity (GO:0004402);; Cellular Component: nucleus (GO:0005634);; Biological Process: regulation of transcription, DNA-templated (GO:0006355);; Molecular Function: zinc ion binding (GO:0008270);; Biological Process: histone acetylation (GO:0016573);;	--	BTB/POZ and TAZ domain-containing protein 4 GN=BT4 OS=Arabidopsis thaliana (Mouse-ear cress) PE=1 SV=1	Uncharacterized protein GN=PRUPE_ppa007060mg OS=Prunus persica (Peach) PE=4 SV=1	PREDICTED: BTB/POZ and TAZ domain-containing protein 4 [Malus domestica]	PREDICTED: Malus x domestica BTB/POZ and TAZ domain-containing protein 4 (LOC103403981), mRNA
CS2_vs_CS1	gene.MD02G1188100	3.21345e-08	-1.84659	down	--	--	Cellular Component: integral component of membrane (GO:0016021);; Molecular Function: transferase activity, transferring hexosyl groups (GO:0016758);;	--	Galactomannan galactosyltransferase 1 GN=GMGT1 OS=Cyamopsis tetragonoloba (Guar) PE=1 SV=1	CAMTA domain class transcription factor GN=CAMTA2 OS=Malus domestica (Apple) PE=2 SV=1	CAMTA domain class transcription factor [Malus domestica]	PREDICTED: Malus x domestica galactomannan galactosyltransferase 1-like (LOC103411018), mRNA
CS2_vs_CS1	gene.MD02G1190300	4.71821e-95	-1.29632	down	[HC]	--	Molecular Function: squalene monooxygenase activity (GO:0004506);; Cellular Component: integral component of membrane (GO:0016021);; Molecular Function: flavin adenine dinucleotide binding (GO:0050660);; Biological Process: oxidation-reduction process (GO:0055114);;	K00511|0.0|rcu:RCOM_0859900|Squalene monooxygenase, putative (EC:1.14.99.7)	Squalene monooxygenase OS=Panax ginseng (Korean ginseng) PE=2 SV=1	Uncharacterized protein GN=PRUPE_ppa003900mg OS=Prunus persica (Peach) PE=4 SV=1	PREDICTED: squalene epoxidase 3-like [Malus domestica]	PREDICTED: Malus x domestica squalene epoxidase 3-like (LOC103404994), mRNA
CS2_vs_CS1	gene.MD02G1190800	9.15047e-25	1.48251	up	--	--	--	--	Uncharacterized protein At3g49720 GN=At3g49720 OS=Arabidopsis thaliana (Mouse-ear cress) PE=1 SV=1	Uncharacterized protein GN=PRUPE_ppa010197mg OS=Prunus persica (Peach) PE=4 SV=1	PREDICTED: uncharacterized protein At3g49720 [Malus domestica]	PREDICTED: Malus x domestica uncharacterized protein At3g49720 (LOC103405011), mRNA
CS2_vs_CS1	gene.MD02G1192600	1.59301e-138	-2.50795	down	--	--	Cellular Component: cell wall (GO:0005618);; Biological Process: cellular glucan metabolic process (GO:0006073);; Molecular Function: xyloglucan:xyloglucosyl transferase activity (GO:0016762);; Molecular Function: xyloglucan-specific endo-beta-1,4-glucanase activity (GO:0033946);; Cellular Component: apoplast (GO:0048046);;	K08235|0.0|pop:POPTR_718004|hypothetical protein	Probable xyloglucan endotransglucosylase/hydrolase protein 6 (Precursor) GN=MPA24.8 OS=Arabidopsis thaliana (Mouse-ear cress) PE=2 SV=2	Xyloglucan endotransglucosylase/hydrolase 4 OS=Malus domestica (Apple) PE=2 SV=1	PREDICTED: probable xyloglucan endotransglucosylase/hydrolase protein 6 [Malus domestica]	PREDICTED: Malus x domestica probable xyloglucan endotransglucosylase/hydrolase protein 6 (LOC103407202), mRNA
CS2_vs_CS1	gene.MD02G1193800	1.54975e-18	-1.52784	down	--	--	--	--	--	Predicted protein GN=POPTRDRAFT_563322 OS=Populus trichocarpa (Western balsam poplar) PE=4 SV=1	PREDICTED: enolase-phosphatase E1-like [Pyrus x bretschneideri]	PREDICTED: Malus x domestica uncharacterized protein DDB_G0283357 (LOC103405432), mRNA
CS2_vs_CS1	gene.MD02G1194600	1.50183e-78	-1.57547	down	[RTKL]	--	Molecular Function: protein serine/threonine kinase activity (GO:0004674);; Molecular Function: ATP binding (GO:0005524);; Biological Process: protein phosphorylation (GO:0006468);; Cellular Component: integral component of membrane (GO:0016021);;	--	Leucine-rich repeat receptor-like serine/threonine-protein kinase BAM1 (Precursor) GN=BAM1 OS=Arabidopsis thaliana (Mouse-ear cress) PE=1 SV=1	Uncharacterized protein GN=PRUPE_ppa000739mg OS=Prunus persica (Peach) PE=4 SV=1	PREDICTED: leucine-rich repeat receptor-like serine/threonine-protein kinase BAM1 [Malus domestica]	PREDICTED: Malus x domestica leucine-rich repeat receptor-like serine/threonine-protein kinase BAM1 (LOC103418386), mRNA
CS2_vs_CS1	gene.MD02G1196100	1.39835e-46	1.34948	up	--	--	--	--	Transcription factor TCP9 GN=TCP9 OS=Arabidopsis thaliana (Mouse-ear cress) PE=2 SV=1	Uncharacterized protein (Fragment) GN=PRUPE_ppa015342mg OS=Prunus persica (Peach) PE=4 SV=1	PREDICTED: transcription factor TCP9-like [Malus domestica]	PREDICTED: Malus x domestica transcription factor TCP9-like (LOC103430372), mRNA
CS2_vs_CS1	gene.MD02G1198500	1.99305e-07	1.2949	up	--	--	Molecular Function: carboxylic ester hydrolase activity (GO:0004091);; Biological Process: metabolic process (GO:0008152);; Molecular Function: retinyl-palmitate esterase activity (GO:0050253);; Molecular Function: methyl indole-3-acetate esterase activity (GO:0080030);; Molecular Function: methyl salicylate esterase activity (GO:0080031);; Molecular Function: methyl jasmonate esterase activity (…	--	Probable carboxylesterase 8 GN=CXE8 OS=Arabidopsis thaliana (Mouse-ear cress) PE=2 SV=1	Uncharacterized protein GN=PRUPE_ppa018617mg OS=Prunus persica (Peach) PE=4 SV=1	PREDICTED: probable carboxylesterase 8 [Malus domestica]	PREDICTED: Malus x domestica probable carboxylesterase 8 (LOC103441552), mRNA
CS2_vs_CS1	gene.MD02G1200300	1.17491e-10	1.59436	up	[Q]	Secondary metabolites biosynthesis, transport and catabolism	--	--	Cytochrome P450 704C1 GN=CYP704C1 OS=Pinus taeda (Loblolly pine) PE=2 SV=1	Uncharacterized protein GN=PRUPE_ppa004495mg OS=Prunus persica (Peach) PE=4 SV=1	PREDICTED: cytochrome P450 704C1-like [Malus domestica]	PREDICTED: Malus x domestica cytochrome P450 704C1-like (LOC103418398), mRNA
CS2_vs_CS1	gene.MD02G1202000	1.03479e-06	-2.07751	down	[TZDR]	--	Biological Process: reproduction (GO:0000003);; Biological Process: cellular process (GO:0009987);; Biological Process: multicellular organismal process (GO:0032501);; Cellular Component: intracellular part (GO:0044424);; Biological Process: anatomical structure development (GO:0048856);;	--	Probable calcium-binding protein CML25 GN=CML25 OS=Arabidopsis thaliana (Mouse-ear cress) PE=2 SV=1	Uncharacterized protein GN=PRUPE_ppa025855mg OS=Prunus persica (Peach) PE=4 SV=1	PREDICTED: probable calcium-binding protein CML18 [Malus domestica]	PREDICTED: Malus x domestica probable calcium-binding protein CML18 (LOC103405926), mRNA
CS2_vs_CS1	gene.MD02G1210200	6.89705e-06	1.10716	up	--	--	--	--	Scarecrow-like protein 6 GN=SCL6 OS=Arabidopsis thaliana (Mouse-ear cress) PE=1 SV=1	Uncharacterized protein GN=PRUPE_ppa001781mg OS=Prunus persica (Peach) PE=4 SV=1	PREDICTED: scarecrow-like protein 6 [Malus domestica]	PREDICTED: Malus x domestica scarecrow-like protein 6 (LOC103434702), mRNA
CS2_vs_CS1	gene.MD02G1221100	1.08631e-14	1.0883	up	--	--	Biological Process: postreplication repair (GO:0006301);;	--	--	Uncharacterized protein GN=PRUPE_ppa014382mg OS=Prunus persica (Peach) PE=4 SV=1	PREDICTED: cytochrome c oxidase-assembly factor COX23, mitochondrial [Malus domestica]	PREDICTED: Malus x domestica cytochrome c oxidase-assembly factor COX23, mitochondrial (LOC103406581), mRNA
CS2_vs_CS1	gene.MD02G1232000	7.92146e-05	-1.90139	down	[R]	General function prediction only	Biological Process: tRNA modification (GO:0006400);; Molecular Function: tRNA (guanine-N7-)-methyltransferase activity (GO:0008176);; Biological Process: RNA (guanine-N7)-methylation (GO:0036265);;	K03439|7e-124|pop:POPTR_242124|hypothetical protein	--	Predicted protein (Fragment) GN=POPTRDRAFT_242124 OS=Populus trichocarpa (Western balsam poplar) PE=4 SV=1	PREDICTED: tRNA (guanine-N(7)-)-methyltransferase [Malus domestica]	PREDICTED: Malus x domestica tRNA (guanine-N(7)-)-methyltransferase (LOC103407934), transcript variant X1, mRNA
CS2_vs_CS1	gene.MD02G1232400	6.45863e-170	1.80457	up	--	--	--	--	--	--	--	PREDICTED: Pyrus x bretschneideri keratin-associated protein 19-2-like (LOC103965005), mRNA
CS2_vs_CS1	gene.MD02G1244700	2.11972e-23	-1.01906	down	--	--	--	--	--	Uncharacterized protein GN=PRUPE_ppa003182mg OS=Prunus persica (Peach) PE=4 SV=1	PREDICTED: uncharacterized protein LOC103941993 [Pyrus x bretschneideri]	PREDICTED: Pyrus x bretschneideri uncharacterized LOC103941993 (LOC103941993), transcript variant X3, mRNA
CS2_vs_CS1	gene.MD02G1248500	1.24263e-11	-1.47451	down	--	--	Biological Process: metabolic process (GO:0008152);; Molecular Function: transferase activity, transferring hexosyl groups (GO:0016758);;	--	Flavanone 7-O-glucoside 2&apos;&apos;-O-beta-L-rhamnosyltransferase GN=C12RT1 OS=Citrus maxima (Pomelo) PE=1 SV=2	Uncharacterized protein GN=PRUPE_ppa016015mg OS=Prunus persica (Peach) PE=4 SV=1	PREDICTED: beta-D-glucosyl crocetin beta-1,6-glucosyltransferase-like [Malus domestica]	PREDICTED: Malus x domestica beta-D-glucosyl crocetin beta-1,6-glucosyltransferase-like (LOC103408495), mRNA
CS2_vs_CS1	gene.MD02G1249500	4.9442e-23	2.33563	up	[RTKL]	--	--	--	Probable receptor-like protein kinase At5g39020 (Precursor) GN=At5g39020 OS=Arabidopsis thaliana (Mouse-ear cress) PE=2 SV=1	Putative uncharacterized protein GN=VIT_16s0098g00420 OS=Vitis vinifera (Grape) PE=3 SV=1	PREDICTED: rust resistance kinase Lr10-like isoform X1 [Malus domestica]	PREDICTED: Malus x domestica rust resistance kinase Lr10-like (LOC103418468), transcript variant X2, mRNA
CS2_vs_CS1	gene.MD02G1262900	9.76066e-09	1.0036	up	[L]	Replication, recombination and repair	Molecular Function: nucleotide binding (GO:0000166);; Biological Process: DNA metabolic process (GO:0006259);; Molecular Function: ATP-dependent helicase activity (GO:0008026);;	K10901|0.0|rcu:RCOM_0321820|DNA helicase hus2, putative	ATP-dependent DNA helicase Q-like 4A GN=At1g10930 OS=Arabidopsis thaliana (Mouse-ear cress) PE=2 SV=1	Uncharacterized protein GN=PRUPE_ppa000416mg OS=Prunus persica (Peach) PE=4 SV=1	PREDICTED: LOW QUALITY PROTEIN: ATP-dependent DNA helicase Q-like 4A [Pyrus x bretschneideri]	PREDICTED: Pyrus x bretschneideri ATP-dependent DNA helicase Q-like 4A (LOC103946115), mRNA
CS2_vs_CS1	gene.MD02G1264600	1.55211e-36	3.29087	up	[R]	General function prediction only	Molecular Function: aldose-6-phosphate reductase (NADPH) activity (GO:0047641);; Biological Process: oxidation-reduction process (GO:0055114);;	--	NADP-dependent D-sorbitol-6-phosphate dehydrogenase GN=S6PDH OS=Malus domestica (Apple) PE=2 SV=1	Putative uncharacterized protein GN=VIT_03s0038g00800 OS=Vitis vinifera (Grape) PE=4 SV=1	PREDICTED: NADP-dependent D-sorbitol-6-phosphate dehydrogenase-like [Malus domestica]	PREDICTED: Malus x domestica NADP-dependent D-sorbitol-6-phosphate dehydrogenase-like (LOC103409005), mRNA
CS2_vs_CS1	gene.MD02G1264800	1.02637e-08	1.47823	up	--	--	--	--	TMV resistance protein N GN=N OS=Nicotiana glutinosa (Tobacco) PE=1 SV=1	Uncharacterized protein GN=PRUPE_ppa023459mg OS=Prunus persica (Peach) PE=4 SV=1	PREDICTED: TMV resistance protein N-like [Pyrus x bretschneideri]	PREDICTED: Pyrus x bretschneideri TMV resistance protein N-like (LOC103946221), mRNA
CS2_vs_CS1	gene.MD02G1268900	1.9354e-07	-2.21626	down	[O]	Posttranslational modification, protein turnover, chaperones	Molecular Function: serine-type endopeptidase activity (GO:0004252);; Cellular Component: extracellular region (GO:0005576);; Biological Process: proteolysis (GO:0006508);; Molecular Function: 2-alkenal reductase [NAD(P)] activity (GO:0032440);; Molecular Function: identical protein binding (GO:0042802);; Biological Process: negative regulation of catalytic activity (GO:0043086);; Biological Proc…	--	Subtilisin-like protease (Precursor) GN=K8K14.8 OS=Arabidopsis thaliana (Mouse-ear cress) PE=1 SV=1	Uncharacterized protein GN=PRUPE_ppa001918mg OS=Prunus persica (Peach) PE=4 SV=1	PREDICTED: CO(2)-response secreted protease-like [Malus domestica]	PREDICTED: Malus x domestica CO(2)-response secreted protease-like (LOC103409241), mRNA
CS2_vs_CS1	gene.MD02G1270200	1.43413e-62	-2.23631	down	--	--	--	--	--	Putative uncharacterized protein GN=VITISV_034254 OS=Vitis vinifera (Grape) PE=4 SV=1	PREDICTED: uncharacterized protein LOC103409360 [Malus domestica]	PREDICTED: Malus x domestica uncharacterized LOC103409360 (LOC103409360), mRNA
CS2_vs_CS1	gene.MD02G1272000	1.52219e-08	-1.13606	down	[R]	General function prediction only	--	--	Dynein assembly factor with WDR repeat domains 1 GN=DAW1 OS=Chlamydomonas reinhardtii (Chlamydomonas smithii) PE=1 SV=1	Uncharacterized protein GN=PRUPE_ppa006950mg OS=Prunus persica (Peach) PE=4 SV=1	PREDICTED: angio-associated migratory cell protein-like [Pyrus x bretschneideri]	PREDICTED: Malus x domestica angio-associated migratory cell protein-like (LOC103407326), mRNA
CS2_vs_CS1	gene.MD02G1272100	2.14878e-10	-1.41788	down	[O]	Posttranslational modification, protein turnover, chaperones	--	K02258|4e-121|ath:AT1G02410|cytochrome c oxidase assembly protein CtaG / Cox11 family	Cytochrome c oxidase assembly protein COX11, mitochondrial (Precursor) GN=COX11 OS=Arabidopsis thaliana (Mouse-ear cress) PE=2 SV=1	Uncharacterized protein GN=PRUPE_ppa010362mg OS=Prunus persica (Peach) PE=4 SV=1	PREDICTED: cytochrome c oxidase assembly protein COX11, mitochondrial [Malus domestica]	PREDICTED: Malus x domestica cytochrome c oxidase assembly protein COX11, mitochondrial-like (LOC103407327), transcript variant X2, mRNA
CS2_vs_CS1	gene.MD02G1272700	0.0041339	-1.39866	down	--	--	--	--	Mediator of RNA polymerase II transcription subunit 15a GN=F7H2.12 OS=Arabidopsis thaliana (Mouse-ear cress) PE=1 SV=1	Uncharacterized protein GN=PRUPE_ppa026990mg OS=Prunus persica (Peach) PE=4 SV=1	PREDICTED: mediator of RNA polymerase II transcription subunit 15a-like [Malus domestica]	PREDICTED: Malus x domestica mediator of RNA polymerase II transcription subunit 15a-like (LOC103410756), mRNA
CS2_vs_CS1	gene.MD02G1274000	1.06231e-166	1.48065	up	[RTKL]	--	--	--	Probable receptor-like protein kinase At1g67000 (Precursor) GN=At1g67000 OS=Arabidopsis thaliana (Mouse-ear cress) PE=2 SV=2	Putative uncharacterized protein GN=VIT_16s0039g01310 OS=Vitis vinifera (Grape) PE=3 SV=1	PREDICTED: probable receptor-like protein kinase At1g67000 [Pyrus x bretschneideri]	PREDICTED: Malus x domestica rust resistance kinase Lr10-like (LOC103441146), mRNA
CS2_vs_CS1	gene.MD02G1277200	0.00831583	-1.26057	down	[S]	Function unknown	--	--	Putative disease resistance RPP13-like protein 1 GN=RPPL1 OS=Arabidopsis thaliana (Mouse-ear cress) PE=3 SV=1	Uncharacterized protein (Fragment) GN=PRUPE_ppa019097mg OS=Prunus persica (Peach) PE=4 SV=1	PREDICTED: putative disease resistance RPP13-like protein 1 [Pyrus x bretschneideri]	PREDICTED: Pyrus x bretschneideri putative disease resistance RPP13-like protein 1 (LOC103959988), transcript variant X2, mRNA
CS2_vs_CS1	gene.MD02G1278100	0.00168109	-1.02103	down	--	--	--	--	--	Uncharacterized protein GN=PRUPE_ppa016062mg OS=Prunus persica (Peach) PE=4 SV=1	PREDICTED: uncharacterized protein LOC103961876 [Pyrus x bretschneideri]	PREDICTED: Malus x domestica uncharacterized LOC103410998 (LOC103410998), transcript variant X2, misc_RNA
CS2_vs_CS1	gene.MD02G1279300	2.04558e-62	-1.49145	down	--	--	Molecular Function: catalytic activity (GO:0003824);; Cellular Component: mitochondrial respiratory chain complex I (GO:0005747);; Biological Process: glycolytic process (GO:0006096);; Biological Process: ubiquitin-dependent protein catabolic process (GO:0006511);; Biological Process: aerobic respiration (GO:0009060);; Biological Process: photorespiration (GO:0009853);; Biological Process: respon…	K03950|4e-66|sbi:SORBI_03g018290|hypothetical protein	NADH dehydrogenase [ubiquinone] 1 alpha subcomplex subunit 6 GN=At3g12260 OS=Arabidopsis thaliana (Mouse-ear cress) PE=2 SV=1	Uncharacterized protein GN=PRUPE_ppa013257mg OS=Prunus persica (Peach) PE=4 SV=1	PREDICTED: NADH dehydrogenase [ubiquinone] 1 alpha subcomplex subunit 6-like [Malus domestica]	PREDICTED: Malus x domestica NADH dehydrogenase [ubiquinone] 1 alpha subcomplex subunit 6-like (LOC103411085), mRNA
CS2_vs_CS1	gene.MD02G1280800	0.00139033	-1.5356	down	--	--	--	--	--	Uncharacterized protein GN=PRUPE_ppa014727mg OS=Prunus persica (Peach) PE=4 SV=1	PREDICTED: uncharacterized protein LOC103411167 [Malus domestica]	PREDICTED: Malus x domestica uncharacterized LOC103411167 (LOC103411167), mRNA
CS2_vs_CS1	gene.MD02G1283300	3.68051e-28	1.49532	up	[OC]	--	Biological Process: rRNA processing (GO:0006364);; Biological Process: tRNA metabolic process (GO:0006399);; Biological Process: glycerol ether metabolic process (GO:0006662);; Molecular Function: electron carrier activity (GO:0009055);; Cellular Component: nucleoid (GO:0009295);; Cellular Component: thylakoid (GO:0009579);; Biological Process: chloroplast organization (GO:0009658);; Molecular Fu…	--	Thioredoxin-like protein CITRX, chloroplastic (Precursor) GN=At3g06730 OS=Arabidopsis thaliana (Mouse-ear cress) PE=1 SV=1	Uncharacterized protein GN=PRUPE_ppa025102mg OS=Prunus persica (Peach) PE=4 SV=1	PREDICTED: thioredoxin-like protein CITRX, chloroplastic [Malus domestica]	PREDICTED: Malus x domestica thioredoxin-like protein CITRX, chloroplastic (LOC103411185), mRNA
CS2_vs_CS1	gene.MD02G1283400	1.41118e-296	2.04236	up	--	--	--	--	--	Putative uncharacterized protein GN=RCOM_1452080 OS=Ricinus communis (Castor bean) PE=4 SV=1	PREDICTED: trihelix transcription factor ASIL2-like [Malus domestica]	PREDICTED: Malus x domestica trihelix transcription factor ASIL2-like (LOC103418556), mRNA
CS2_vs_CS1	gene.MD02G1283800	2.8189e-83	7.99634	up	--	--	Molecular Function: aspartic-type endopeptidase activity (GO:0004190);; Biological Process: proteolysis (GO:0006508);;	--	Aspartic proteinase nepenthesin-1 (Precursor) GN=nep1 OS=Nepenthes gracilis (Slender pitcher plant) PE=1 SV=1	Uncharacterized protein GN=PRUPE_ppa005966mg OS=Prunus persica (Peach) PE=4 SV=1	PREDICTED: aspartyl protease AED3-like [Malus domestica]	PREDICTED: Malus x domestica aspartyl protease AED3-like (LOC103411200), mRNA
CS2_vs_CS1	gene.MD02G1284100	1.04655e-141	1.83558	up	--	--	--	--	--	Uncharacterized protein GN=PRUPE_ppa007439mg OS=Prunus persica (Peach) PE=4 SV=1	PREDICTED: uncharacterized protein LOC103411235 [Malus domestica]	PREDICTED: Malus x domestica uncharacterized LOC103407421 (LOC103407421), transcript variant X2, mRNA
CS2_vs_CS1	gene.MD02G1291200	2.32146e-25	-1.08457	down	--	--	Molecular Function: calcium ion binding (GO:0005509);; Molecular Function: calcium-dependent phospholipid binding (GO:0005544);; Biological Process: response to osmotic stress (GO:0006970);; Cellular Component: plasmodesma (GO:0009506);; Biological Process: response to abscisic acid (GO:0009737);; Cellular Component: cell surface (GO:0009986);;	--	Annexin D4 GN=T6A23.5 OS=Arabidopsis thaliana (Mouse-ear cress) PE=2 SV=1	Uncharacterized protein GN=PRUPE_ppa008922mg OS=Prunus persica (Peach) PE=4 SV=1	PREDICTED: annexin D4-like [Pyrus x bretschneideri]	PREDICTED: Pyrus x bretschneideri annexin D4-like (LOC103945580), mRNA
CS2_vs_CS1	gene.MD02G1291400	1.00435e-29	-1.87939	down	--	--	Molecular Function: aspartic-type endopeptidase activity (GO:0004190);; Biological Process: proteolysis (GO:0006508);;	--	Aspartic proteinase-like protein 2 (Precursor) GN=At1g65240 OS=Arabidopsis thaliana (Mouse-ear cress) PE=1 SV=2	Uncharacterized protein GN=PRUPE_ppa022455mg OS=Prunus persica (Peach) PE=4 SV=1	PREDICTED: aspartic proteinase-like protein 2 isoform X2 [Malus domestica]	PREDICTED: Malus x domestica aspartic proteinase-like protein 2 (LOC103411582), transcript variant X2, mRNA
CS2_vs_CS1	gene.MD02G1296000	9.538e-62	-2.266	down	[Q]	Secondary metabolites biosynthesis, transport and catabolism	Molecular Function: iron ion binding (GO:0005506);; Cellular Component: endoplasmic reticulum (GO:0005783);; Molecular Function: electron carrier activity (GO:0009055);; Biological Process: suberin biosynthetic process (GO:0010345);; Molecular Function: heme binding (GO:0020037);; Biological Process: very long-chain fatty acid biosynthetic process (GO:0042761);; Biological Process: oxidation-redu…	--	Cytochrome P450 86B1 GN=CYP86B1 OS=Arabidopsis thaliana (Mouse-ear cress) PE=2 SV=1	Uncharacterized protein GN=PRUPE_ppa004331mg OS=Prunus persica (Peach) PE=4 SV=1	PREDICTED: cytochrome P450 86B1-like [Malus domestica]	PREDICTED: Malus x domestica cytochrome P450 86B1-like (LOC103451675), mRNA
CS2_vs_CS1	gene.MD02G1296200	3.26718e-05	-1.41146	down	[L]	Replication, recombination and repair	Molecular Function: DNA binding (GO:0003677);; Molecular Function: endonuclease activity (GO:0004519);; Biological Process: DNA metabolic process (GO:0006259);; Biological Process: nucleic acid phosphodiester bond hydrolysis (GO:0090305);;	K08991|0.0|rcu:RCOM_1453710|endonuclease, putative	Crossover junction endonuclease MUS81 GN=MUS81 OS=Arabidopsis thaliana (Mouse-ear cress) PE=1 SV=1	Uncharacterized protein GN=PRUPE_ppa002407mg OS=Prunus persica (Peach) PE=4 SV=1	PREDICTED: crossover junction endonuclease MUS81 isoform X1 [Pyrus x bretschneideri]	PREDICTED: Pyrus x bretschneideri crossover junction endonuclease MUS81 (LOC103945557), transcript variant X1, mRNA
CS2_vs_CS1	gene.MD02G1300200	1.02883e-20	-1.70278	down	--	--	--	--	--	Uncharacterized protein GN=PRUPE_ppa021262mg OS=Prunus persica (Peach) PE=4 SV=1	PREDICTED: uncharacterized protein LOC103418580 [Malus domestica]	PREDICTED: Malus x domestica uncharacterized LOC103427001 (LOC103427001), mRNA
CS2_vs_CS1	gene.MD02G1300900	8.94343e-93	-3.07828	down	--	--	--	K13289|0.0|rcu:RCOM_0962680|serine carboxypeptidase, putative (EC:3.4.16.6)	Serine carboxypeptidase-like 40 (Precursor) GN=SCPL40 OS=Arabidopsis thaliana (Mouse-ear cress) PE=2 SV=2	Uncharacterized protein GN=PRUPE_ppa004618mg OS=Prunus persica (Peach) PE=4 SV=1	PREDICTED: serine carboxypeptidase-like 40 [Malus domestica]	PREDICTED: Malus x domestica serine carboxypeptidase-like 40 (LOC103427002), mRNA
CS2_vs_CS1	gene.MD02G1302500	1.65119e-08	3.15986	up	--	--	--	--	--	--	--	PREDICTED: Malus x domestica uncharacterized LOC103407467 (LOC103407467), transcript variant X1, ncRNA
CS2_vs_CS1	gene.MD02G1302800	5.66968e-54	-1.83652	down	[MG]	--	Molecular Function: catalytic activity (GO:0003824);; Biological Process: cellular metabolic process (GO:0044237);; Molecular Function: coenzyme binding (GO:0050662);;	--	Tetraketide alpha-pyrone reductase 1 GN=F23E12.20 OS=Arabidopsis thaliana (Mouse-ear cress) PE=2 SV=1	Uncharacterized protein GN=PRUPE_ppa008707mg OS=Prunus persica (Peach) PE=4 SV=1	PREDICTED: cinnamoyl-CoA reductase 1-like isoform X1 [Malus domestica]	PREDICTED: Malus x domestica cinnamoyl-CoA reductase 1-like (LOC103412848), transcript variant X1, mRNA
CS2_vs_CS1	gene.MD02G1302900	2.1905e-08	1.88195	up	[MG]	--	Molecular Function: catalytic activity (GO:0003824);; Biological Process: cellular metabolic process (GO:0044237);; Molecular Function: coenzyme binding (GO:0050662);;	--	Tetraketide alpha-pyrone reductase 1 GN=F23E12.20 OS=Arabidopsis thaliana (Mouse-ear cress) PE=2 SV=1	Uncharacterized protein GN=PRUPE_ppa008707mg OS=Prunus persica (Peach) PE=4 SV=1	PREDICTED: cinnamoyl-CoA reductase 1-like [Malus domestica]	PREDICTED: Pyrus x bretschneideri cinnamoyl-CoA reductase 1-like (LOC103945500), transcript variant X3, mRNA
CS2_vs_CS1	gene.MD02G1305600	2.48487e-09	-1.52437	down	[R]	General function prediction only	Cellular Component: nucleus (GO:0005634);;	--	Notchless protein homolog GN=NLE1 OS=Arabidopsis thaliana (Mouse-ear cress) PE=2 SV=1	Uncharacterized protein GN=PRUPE_ppa005167mg OS=Prunus persica (Peach) PE=4 SV=1	PREDICTED: notchless protein homolog [Pyrus x bretschneideri]	PREDICTED: Pyrus x bretschneideri notchless protein homolog (LOC103945498), mRNA
CS2_vs_CS1	gene.MD02G1307100	2.85865e-06	1.87593	up	--	--	--	--	--	--	--	PREDICTED: Malus x domestica uncharacterized LOC103407473 (LOC103407473), transcript variant X2, ncRNA
CS2_vs_CS1	gene.MD02G1308200	3.60227e-05	-1.16381	down	--	--	--	--	--	Uncharacterized protein GN=PRUPE_ppa013060mg OS=Prunus persica (Peach) PE=4 SV=1	hypothetical protein PRUPE_ppa013060mg [Prunus persica]	PREDICTED: Vitis vinifera uncharacterized LOC104881332 (LOC104881332), mRNA
CS2_vs_CS1	gene.MD02G1309300	2.45665e-06	-1.49808	down	--	--	Cellular Component: nucleus (GO:0005634);; Biological Process: chromatin organization (GO:0006325);; Biological Process: developmental process (GO:0032502);;	--	Actin-related protein 7 GN=ARP7 OS=Arabidopsis thaliana (Mouse-ear cress) PE=1 SV=1	Uncharacterized protein GN=PRUPE_ppa007632mg OS=Prunus persica (Peach) PE=4 SV=1	PREDICTED: actin-related protein 7 [Pyrus x bretschneideri]	PREDICTED: Malus x domestica actin-related protein 7-like (LOC103425532), transcript variant X2, mRNA
CS2_vs_CS1	gene.MD02G1309600	9.23905e-18	1.92152	up	[Q]	Secondary metabolites biosynthesis, transport and catabolism	Molecular Function: oxidoreductase activity, acting on single donors with incorporation of molecular oxygen, incorporation of two atoms of oxygen (GO:0016702);;	K11159|2e-48|vvi:100249903|hypothetical protein LOC100249903	Carotenoid 9,10(9&apos;,10&apos;)-cleavage dioxygenase 1 GN=CCD1 OS=Phaseolus vulgaris (Kidney bean) PE=1 SV=1	Carotenoid cleavage dioxygenases OS=Malus hupehensis var. mengshanensis PE=2 SV=1	PREDICTED: carotenoid 9,10(9&apos;,10&apos;)-cleavage dioxygenase 1-like [Malus domestica]	PREDICTED: Malus x domestica carotenoid 9,10(9',10')-cleavage dioxygenase 1-like (LOC103427020), mRNA
CS2_vs_CS1	gene.MD02G1309800	1.05352e-06	-2.8853	down	--	--	--	--	Nuclear transcription factor Y subunit A-7 GN=NFYA7 OS=Arabidopsis thaliana (Mouse-ear cress) PE=2 SV=1	Putative uncharacterized protein GN=VIT_13s0064g00860 OS=Vitis vinifera (Grape) PE=4 SV=1	PREDICTED: nuclear transcription factor Y subunit A-4-like [Malus domestica]	PREDICTED: Malus x domestica nuclear transcription factor Y subunit A-4-like (LOC103427021), mRNA
CS2_vs_CS1	gene.MD02G1315900	6.22997e-07	-1.01511	down	[O]	Posttranslational modification, protein turnover, chaperones	--	--	ATP-dependent zinc metalloprotease FtsH GN=ftsH OS=Cyanidium caldarium PE=3 SV=1	Uncharacterized protein GN=PRUPE_ppa001341mg OS=Prunus persica (Peach) PE=4 SV=1	PREDICTED: ATP-dependent zinc metalloprotease FtsH isoform X1 [Pyrus x bretschneideri]	PREDICTED: Pyrus x bretschneideri ATP-dependent zinc metalloprotease FtsH (LOC103954890), transcript variant X3, misc_RNA
CS2_vs_CS1	gene.MD02G1317900	7.6149e-13	-1.6739	down	--	--	--	--	Uncharacterized protein At1g04910 GN=At1g04910 OS=Arabidopsis thaliana (Mouse-ear cress) PE=1 SV=1	Uncharacterized protein GN=PRUPE_ppa003424mg OS=Prunus persica (Peach) PE=4 SV=1	PREDICTED: uncharacterized protein At1g04910-like [Malus domestica]	PREDICTED: Malus x domestica uncharacterized protein At1g04910-like (LOC103413468), mRNA
CS2_vs_CS1	gene.MD02G1318700	4.76679e-09	-1.21775	down	--	--	--	--	Homeobox-leucine zipper protein HAT14 GN=HAT14 OS=Arabidopsis thaliana (Mouse-ear cress) PE=2 SV=3	Uncharacterized protein GN=PRUPE_ppa007421mg OS=Prunus persica (Peach) PE=4 SV=1	PREDICTED: homeobox-leucine zipper protein HOX11-like [Malus domestica]	PREDICTED: Malus x domestica homeobox-leucine zipper protein HOX11-like (LOC103413501), mRNA
CS2_vs_CS1	gene.MD02G1319800	4.51704e-10	-1.47131	down	--	--	Molecular Function: calcium ion binding (GO:0005509);; Cellular Component: cytosol (GO:0005829);;	--	--	Uncharacterized protein GN=PRUPE_ppa013112mg OS=Prunus persica (Peach) PE=4 SV=1	PREDICTED: uncharacterized protein LOC103418606 [Malus domestica]	PREDICTED: Malus x domestica uncharacterized LOC103427026 (LOC103427026), mRNA
CS2_vs_CS1	gene.MD03G1002400	4.48273e-19	-2.10004	down	--	--	--	--	Cleavage and polyadenylation specificity factor CPSF30 GN=CPSF30 OS=Arabidopsis thaliana (Mouse-ear cress) PE=1 SV=1	Uncharacterized protein OS=Glycine max (Soybean) PE=4 SV=1	PREDICTED: YTH domain-containing family protein 2-like isoform X2 [Malus domestica]	PREDICTED: Malus x domestica YTH domain-containing family protein 2-like (YTP2), transcript variant X2, mRNA
CS2_vs_CS1	gene.MD03G1002600	0.000184695	-1.01202	down	[O]	Posttranslational modification, protein turnover, chaperones	Cellular Component: cytoplasm (GO:0005737);; Biological Process: metabolic process (GO:0008152);; Molecular Function: serine-type peptidase activity (GO:0008236);;	--	Subtilisin-like protease (Precursor) GN=K8K14.8 OS=Arabidopsis thaliana (Mouse-ear cress) PE=1 SV=1	Uncharacterized protein (Fragment) GN=PRUPE_ppa017229mg OS=Prunus persica (Peach) PE=4 SV=1	PREDICTED: subtilisin-like protease SBT3.18 [Malus domestica]	PREDICTED: Malus x domestica subtilisin-like protease SBT3.18 (LOC103414738), mRNA
CS2_vs_CS1	gene.MD03G1003400	7.3579e-07	1.28248	up	--	--	--	--	--	Uncharacterized protein GN=PRUPE_ppa012539mg OS=Prunus persica (Peach) PE=4 SV=1	PREDICTED: uncharacterized protein LOC103414759 [Malus domestica]	PREDICTED: Malus x domestica uncharacterized LOC103414759 (LOC103414759), mRNA
CS2_vs_CS1	gene.MD03G1003700	2.9433e-27	1.09013	up	--	--	Cellular Component: nucleus (GO:0005634);;	--	--	Uncharacterized protein GN=PRUPE_ppa011489mg OS=Prunus persica (Peach) PE=4 SV=1	PREDICTED: uncharacterized protein LOC103414811 [Malus domestica]	PREDICTED: Malus x domestica uncharacterized LOC103418652 (LOC103418652), mRNA
CS2_vs_CS1	gene.MD03G1004800	1.6854e-07	-1.32371	down	[J]	Translation, ribosomal structure and biogenesis	Molecular Function: aminoacyl-tRNA hydrolase activity (GO:0004045);;	--	Peptidyl-tRNA hydrolase, mitochondrial (Precursor) GN=At5g19830 OS=Arabidopsis thaliana (Mouse-ear cress) PE=2 SV=1	Uncharacterized protein GN=PRUPE_ppa011211mg OS=Prunus persica (Peach) PE=4 SV=1	PREDICTED: peptidyl-tRNA hydrolase, mitochondrial isoform X2 [Malus domestica]	PREDICTED: Malus x domestica peptidyl-tRNA hydrolase, mitochondrial (LOC103414928), transcript variant X2, mRNA
CS2_vs_CS1	gene.MD03G1004900	0.00100586	-1.61729	down	--	--	--	K09422|5e-18|vvi:100232973|MYB5b	Transcription repressor MYB5 GN=MYB5 OS=Arabidopsis thaliana (Mouse-ear cress) PE=1 SV=1	MYB domain class transcription factor GN=MYB12 OS=Malus domestica (Apple) PE=2 SV=1	MYB domain class transcription factor [Malus domestica]	PREDICTED: Malus x domestica uncharacterized LOC103414939 (LOC103414939), ncRNA
CS2_vs_CS1	gene.MD03G1005900	1.5856e-16	-1.9088	down	--	--	--	--	Glucan endo-1,3-beta-glucosidase 4 (Precursor) GN=At3g13560 OS=Arabidopsis thaliana (Mouse-ear cress) PE=1 SV=1	Uncharacterized protein GN=PRUPE_ppa004732mg OS=Prunus persica (Peach) PE=4 SV=1	PREDICTED: glucan endo-1,3-beta-glucosidase 4-like [Malus domestica]	PREDICTED: Malus x domestica glucan endo-1,3-beta-glucosidase 4-like (LOC103418654), transcript variant X5, mRNA
CS2_vs_CS1	gene.MD03G1006400	0.00382196	1.3518	up	--	--	--	--	Feruloyl CoA ortho-hydroxylase 1 GN=F6&apos;H1 OS=Arabidopsis thaliana (Mouse-ear cress) PE=1 SV=1	Uncharacterized protein GN=PRUPE_ppa020537mg OS=Prunus persica (Peach) PE=4 SV=1	PREDICTED: LOW QUALITY PROTEIN: feruloyl CoA ortho-hydroxylase 1-like [Malus domestica]	PREDICTED: Malus x domestica feruloyl CoA ortho-hydroxylase 1-like (LOC103415491), mRNA
CS2_vs_CS1	gene.MD03G1007700	8.78602e-38	-1.3514	down	--	--	--	--	--	Uncharacterized protein GN=PRUPE_ppa012400mg OS=Prunus persica (Peach) PE=4 SV=1	PREDICTED: uncharacterized protein LOC103415116 [Malus domestica]	PREDICTED: Malus x domestica uncharacterized LOC103415116 (LOC103415116), transcript variant X8, misc_RNA
CS2_vs_CS1	gene.MD03G1008300	3.1169e-06	-2.27231	down	--	--	--	--	--	T3.5 protein GN=T3.5 OS=Malus x robusta PE=4 SV=1	T3.5 [Malus x robusta]	PREDICTED: Malus x domestica uncharacterized LOC103407536 (LOC103407536), transcript variant X3, ncRNA
CS2_vs_CS1	gene.MD03G1014400	2.98503e-06	2.14073	up	--	--	Molecular Function: peroxidase activity (GO:0004601);; Biological Process: response to oxidative stress (GO:0006979);; Biological Process: response to virus (GO:0009615);; Biological Process: response to ethylene (GO:0009723);; Molecular Function: heme binding (GO:0020037);; Molecular Function: metal ion binding (GO:0046872);; Biological Process: oxidation-reduction process (GO:0055114);;	--	Peroxidase 15 (Precursor) GN=pod OS=Ipomoea batatas (Sweet potato) PE=1 SV=1	Uncharacterized protein GN=PRUPE_ppa027053mg OS=Prunus persica (Peach) PE=4 SV=1	PREDICTED: peroxidase A2-like [Pyrus x bretschneideri]	PREDICTED: Malus x domestica peroxidase 15-like (LOC103418662), mRNA
CS2_vs_CS1	gene.MD03G1014700	2.15179e-05	1.52986	up	--	--	--	--	--	--	PREDICTED: uncharacterized protein LOC103455038 isoform X4 [Malus domestica]	PREDICTED: Malus x domestica uncharacterized LOC103415640 (LOC103415640), transcript variant X2, ncRNA
CS2_vs_CS1	gene.MD03G1017000	4.53865e-17	-1.09763	down	--	--	--	--	--	DNA binding protein, putative GN=RCOM_1576560 OS=Ricinus communis (Castor bean) PE=4 SV=1	PREDICTED: uncharacterized protein LOC103418669 [Malus domestica]	PREDICTED: Malus x domestica uncharacterized LOC103418669 (LOC103418669), mRNA
CS2_vs_CS1	gene.MD03G1017100	6.93059e-13	-2.3075	down	--	--	--	--	Tyrosine-sulfated glycopeptide receptor 1 GN=PSYR1 OS=Arabidopsis thaliana (Mouse-ear cress) PE=2 SV=1	Uncharacterized protein (Fragment) GN=PRUPE_ppa015990mg OS=Prunus persica (Peach) PE=4 SV=1	PREDICTED: tyrosine-sulfated glycopeptide receptor 1-like [Pyrus x bretschneideri]	PREDICTED: Malus x domestica receptor-like protein 2 (LOC103418683), mRNA
CS2_vs_CS1	gene.MD03G1019200	4.0203e-05	1.99146	up	--	--	--	--	--	--	PREDICTED: tyrosine-sulfated glycopeptide receptor 1-like isoform X2 [Malus domestica]	PREDICTED: Malus x domestica tyrosine-sulfated glycopeptide receptor 1-like (LOC108171166), transcript variant X2, mRNA
CS2_vs_CS1	gene.MD03G1021200	3.02758e-09	2.34213	up	--	--	Molecular Function: iron ion binding (GO:0005506);; Molecular Function: linoleate 13S-lipoxygenase activity (GO:0016165);; Biological Process: oxylipin biosynthetic process (GO:0031408);; Biological Process: oxidation-reduction process (GO:0055114);;	--	Linoleate 13S-lipoxygenase 2-1, chloroplastic (Precursor) GN=LOX2.1 OS=Solanum tuberosum (Potato) PE=1 SV=1	Uncharacterized protein GN=PRUPE_ppa000968mg OS=Prunus persica (Peach) PE=4 SV=1	linoleate 13S-lipoxygenase 2-1, chloroplastic-like [Malus domestica]	Malus domestica linoleate 13S-lipoxygenase 2-1, chloroplastic-like (LOC103447063), mRNA>gi|485451135|gb|KC706492.1| Malus x domestica clone 3 lipoxygenase (LOX6a) mRNA, complete cds
CS2_vs_CS1	gene.MD03G1028500	0.00327412	-1.15647	down	--	--	--	--	Pentatricopeptide repeat-containing protein At5g55840 GN=At5g55840 OS=Arabidopsis thaliana (Mouse-ear cress) PE=2 SV=2	Uncharacterized protein GN=PRUPE_ppa021196mg OS=Prunus persica (Peach) PE=4 SV=1	PREDICTED: pentatricopeptide repeat-containing protein At5g55840-like [Malus domestica]	PREDICTED: Malus x domestica pentatricopeptide repeat-containing protein At5g55840-like (LOC103422509), mRNA
CS2_vs_CS1	gene.MD03G1029700	1.07684e-07	-1.17043	down	[K]	Transcription	--	K03027|0.0|vvi:100248046|hypothetical protein LOC100248046	DNA-directed RNA polymerase II subunit RPB3-A GN=RPB36A OS=Arabidopsis thaliana (Mouse-ear cress) PE=2 SV=1	Uncharacterized protein GN=PRUPE_ppa006811mg OS=Prunus persica (Peach) PE=4 SV=1	PREDICTED: DNA-directed RNA polymerases I and III subunit rpac1-like [Malus domestica]	PREDICTED: Malus x domestica DNA-directed RNA polymerases I and III subunit rpac1-like (LOC103412574), mRNA
CS2_vs_CS1	gene.MD03G1032300	8.91051e-67	-1.90727	down	[R]	General function prediction only	--	--	1-aminocyclopropane-1-carboxylate oxidase homolog 3 GN=At1g06650 OS=Arabidopsis thaliana (Mouse-ear cress) PE=2 SV=1	Uncharacterized protein GN=PRUPE_ppa027196mg OS=Prunus persica (Peach) PE=4 SV=1	PREDICTED: 1-aminocyclopropane-1-carboxylate oxidase homolog 3-like [Malus domestica]	PREDICTED: Malus x domestica 1-aminocyclopropane-1-carboxylate oxidase homolog 3-like (LOC103418032), mRNA
CS2_vs_CS1	gene.MD03G1034900	1.81065e-18	1.21034	up	[H]	Coenzyme transport and metabolism	Molecular Function: dimethylallyltranstransferase activity (GO:0004161);; Molecular Function: geranyltranstransferase activity (GO:0004337);; Biological Process: isoprenoid biosynthetic process (GO:0008299);;	K00787|0.0|vvi:100232975|farnesyl diphosphate synthase	Farnesyl pyrophosphate synthase 2 GN=FPS2 OS=Parthenium argentatum (Guayule rubber plant) PE=2 SV=1	Uncharacterized protein GN=PRUPE_ppa008174mg OS=Prunus persica (Peach) PE=4 SV=1	PREDICTED: farnesyl pyrophosphate synthase 2-like isoform X1 [Malus domestica]	PREDICTED: Malus x domestica farnesyl pyrophosphate synthase 2-like (LOC103407600), transcript variant X1, mRNA
CS2_vs_CS1	gene.MD03G1038700	9.24085e-07	-1.72406	down	--	--	--	--	--	--	--	PREDICTED: Malus x domestica uncharacterized LOC103410162 (LOC103410162), ncRNA
CS2_vs_CS1	gene.MD03G1040100	1.3918e-78	-1.04184	down	--	--	Molecular Function: hydrolase activity, hydrolyzing O-glycosyl compounds (GO:0004553);; Biological Process: metabolic process (GO:0008152);; Molecular Function: galactinol-raffinose galactosyltransferase activity (GO:0047268);;	--	Probable galactinol--sucrose galactosyltransferase 1 OS=Arabidopsis thaliana (Mouse-ear cress) PE=2 SV=1	Uncharacterized protein GN=PRUPE_ppa001841mg OS=Prunus persica (Peach) PE=4 SV=1	PREDICTED: probable galactinol--sucrose galactosyltransferase 1 [Malus domestica]	PREDICTED: Malus x domestica probable galactinol--sucrose galactosyltransferase 1 (LOC103416906), mRNA
CS2_vs_CS1	gene.MD03G1050200	8.21423e-05	-1.48059	down	--	--	--	--	Methylesterase 17 GN=MES17 OS=Arabidopsis thaliana (Mouse-ear cress) PE=1 SV=1	Uncharacterized protein GN=PRUPE_ppa009635mg OS=Prunus persica (Peach) PE=4 SV=1	PREDICTED: methylesterase 17-like [Pyrus x bretschneideri]	PREDICTED: Pyrus x bretschneideri methylesterase 17-like (LOC103946084), mRNA
CS2_vs_CS1	gene.MD03G1051900	3.10017e-12	1.95199	up	--	--	--	--	Transcription factor RF2b GN=RF2b OS=Oryza sativa subsp. japonica (Rice) PE=1 SV=1	Uncharacterized protein GN=PRUPE_ppa006097mg OS=Prunus persica (Peach) PE=4 SV=1	PREDICTED: transcription factor RF2b-like [Malus domestica]	PREDICTED: Malus x domestica transcription factor RF2b-like (LOC103407642), mRNA
CS2_vs_CS1	gene.MD03G1054600	2.29246e-06	-1.36108	down	--	--	Molecular Function: oxidoreductase activity (GO:0016491);; Biological Process: oxidation-reduction process (GO:0055114);;	--	--	Uncharacterized protein (Fragment) GN=PRUPE_ppa022175mg OS=Prunus persica (Peach) PE=4 SV=1	PREDICTED: phytoene dehydrogenase, chloroplastic/chromoplastic-like [Malus domestica]	PREDICTED: Malus x domestica phytoene dehydrogenase, chloroplastic/chromoplastic-like (LOC103418736), mRNA
CS2_vs_CS1	gene.MD03G1058400	0.00272801	1.00939	up	--	--	--	--	--	Putative uncharacterized protein GN=RCOM_1136630 OS=Ricinus communis (Castor bean) PE=4 SV=1	PREDICTED: protein NUCLEAR FUSION DEFECTIVE 4-like [Malus domestica]	PREDICTED: Malus x domestica protein NUCLEAR FUSION DEFECTIVE 4-like (LOC103418351), mRNA
CS2_vs_CS1	gene.MD03G1059200	1.9713e-05	2.04538	up	--	--	--	K00430|3e-158|vvi:100257005|Peroxidase 4	Peroxidase 4 (Precursor) OS=Vitis vinifera (Grape) PE=1 SV=1	Uncharacterized protein GN=PRUPE_ppa008607mg OS=Prunus persica (Peach) PE=4 SV=1	PREDICTED: peroxidase 4-like [Malus domestica]	PREDICTED: Malus x domestica peroxidase 4-like (LOC103418409), mRNA
CS2_vs_CS1	gene.MD03G1060100	2.36734e-19	4.20683	up	--	--	Biological Process: leaf morphogenesis (GO:0009965);;	--	LOB domain-containing protein 12 GN=T27E13.13 OS=Arabidopsis thaliana (Mouse-ear cress) PE=2 SV=2	Uncharacterized protein GN=PRUPE_ppa012275mg OS=Prunus persica (Peach) PE=4 SV=1	PREDICTED: LOB domain-containing protein 12 [Malus domestica]	PREDICTED: Malus x domestica LOB domain-containing protein 12 (LOC103418475), mRNA
CS2_vs_CS1	gene.MD03G1065600	2.17734e-30	1.91099	up	[T]	Signal transduction mechanisms	Molecular Function: protein serine/threonine phosphatase activity (GO:0004722);; Biological Process: protein dephosphorylation (GO:0006470);; Molecular Function: metal ion binding (GO:0046872);;	--	Probable protein phosphatase 2C 2 GN=At1g07160 OS=Arabidopsis thaliana (Mouse-ear cress) PE=2 SV=1	Uncharacterized protein GN=PRUPE_ppa007302mg OS=Prunus persica (Peach) PE=4 SV=1	PREDICTED: probable protein phosphatase 2C 25 [Malus domestica]	PREDICTED: Malus x domestica probable protein phosphatase 2C 25 (LOC103418656), mRNA
CS2_vs_CS1	gene.MD03G1066000	6.60858e-10	-1.31303	down	[E]	Amino acid transport and metabolism	Molecular Function: asparagine synthase (glutamine-hydrolyzing) activity (GO:0004066);; Molecular Function: ATP binding (GO:0005524);; Biological Process: cellular amino acid catabolic process (GO:0009063);; Biological Process: response to absence of light (GO:0009646);; Biological Process: L-asparagine biosynthetic process (GO:0070981);;	K01953|0.0|vvi:100241610|hypothetical protein LOC100241610	Asparagine synthetase [glutamine-hydrolyzing] OS=Asparagus officinalis (Garden asparagus) PE=2 SV=2	Uncharacterized protein GN=PRUPE_ppa003265mg OS=Prunus persica (Peach) PE=4 SV=1	PREDICTED: asparagine synthetase [glutamine-hydrolyzing]-like [Pyrus x bretschneideri]	PREDICTED: Pyrus x bretschneideri asparagine synthetase [glutamine-hydrolyzing]-like (LOC103945091), transcript variant X2, mRNA
CS2_vs_CS1	gene.MD03G1067300	7.79942e-17	-1.85121	down	--	--	--	--	Putative disease resistance protein RGA4 GN=RGA4 OS=Solanum bulbocastanum (Wild potato) PE=2 SV=1	Uncharacterized protein GN=PRUPE_ppa021551mg OS=Prunus persica (Peach) PE=4 SV=1	PREDICTED: putative disease resistance protein RGA3 [Pyrus x bretschneideri]	PREDICTED: Malus x domestica putative disease resistance protein RGA3 (LOC103420029), transcript variant X1, mRNA
CS2_vs_CS1	gene.MD03G1069900	2.29477e-33	-1.64156	down	--	--	--	--	--	Putative uncharacterized protein GN=ARALYDRAFT_887933 OS=Arabidopsis lyrata subsp. lyrata (Lyre-leaved rock-cress) PE=4 SV=1	PREDICTED: protein O-glucosyltransferase 1 [Malus domestica]	PREDICTED: Malus x domestica protein O-glucosyltransferase 1 (LOC103418716), mRNA
CS2_vs_CS1	gene.MD03G1070000	2.70387e-07	-1.16472	down	--	--	Molecular Function: metal ion binding (GO:0046872);;	--	Putative E3 ubiquitin-protein ligase XBAT34 OS=Arabidopsis thaliana (Mouse-ear cress) PE=2 SV=1	Uncharacterized protein GN=PRUPE_ppa005117mg OS=Prunus persica (Peach) PE=4 SV=1	PREDICTED: uncharacterized protein LOC103418723 isoform X1 [Malus domestica]	PREDICTED: Malus x domestica uncharacterized LOC103418723 (LOC103418723), transcript variant X1, mRNA
CS2_vs_CS1	gene.MD03G1081000	2.79092e-71	1.51601	up	--	--	Molecular Function: protein kinase activity (GO:0004672);; Molecular Function: ATP binding (GO:0005524);; Biological Process: protein phosphorylation (GO:0006468);; Cellular Component: plasmodesma (GO:0009506);;	--	Probable serine/threonine-protein kinase At5g41260 GN=At5g41260 OS=Arabidopsis thaliana (Mouse-ear cress) PE=1 SV=1	Uncharacterized protein GN=PRUPE_ppa004824mg OS=Prunus persica (Peach) PE=4 SV=1	PREDICTED: probable serine/threonine-protein kinase At5g41260 isoform X4 [Malus domestica]	PREDICTED: Malus x domestica probable serine/threonine-protein kinase At5g41260 (LOC103419303), transcript variant X4, mRNA
CS2_vs_CS1	gene.MD03G1083100	4.48139e-90	-2.22059	down	--	--	Biological Process: response to oxidative stress (GO:0006979);;	--	--	Uncharacterized protein GN=PRUPE_ppa011283mg OS=Prunus persica (Peach) PE=4 SV=1	PREDICTED: uncharacterized protein LOC103448526 [Malus domestica]	PREDICTED: Malus x domestica uncharacterized LOC103448526 (LOC103448526), mRNA
CS2_vs_CS1	gene.MD03G1085400	2.68703e-41	-4.71264	down	[T]	Signal transduction mechanisms	Molecular Function: phosphoprotein phosphatase activity (GO:0004721);; Biological Process: response to oxygen-containing compound (GO:1901700);;	K14497|8e-158|pop:POPTR_768154|hypothetical protein	Probable protein phosphatase 2C 24 GN=At2g29380 OS=Arabidopsis thaliana (Mouse-ear cress) PE=2 SV=1	Uncharacterized protein GN=PRUPE_ppa006696mg OS=Prunus persica (Peach) PE=4 SV=1	PREDICTED: probable protein phosphatase 2C 24 [Malus domestica]	PREDICTED: Malus x domestica probable protein phosphatase 2C 24 (LOC103420436), mRNA
CS2_vs_CS1	gene.MD03G1086300	1.42311e-10	-3.13279	down	--	--	Molecular Function: ATP binding (GO:0005524);;	--	Ribulose bisphosphate carboxylase/oxygenase activase 1, chloroplastic (Precursor) GN=RCA1 OS=Larrea tridentata (Creosote bush) PE=1 SV=1	Uncharacterized protein GN=PRUPE_ppa005137mg OS=Prunus persica (Peach) PE=4 SV=1	PREDICTED: ribulose bisphosphate carboxylase/oxygenase activase, chloroplastic [Malus domestica]	PREDICTED: Malus x domestica ribulose bisphosphate carboxylase/oxygenase activase, chloroplastic (LOC103407730), mRNA
CS2_vs_CS1	gene.MD03G1086500	1.78734e-22	-1.03127	down	[M]	Cell wall/membrane/envelope biogenesis	Biological Process: intracellular protein transport (GO:0006886);; Molecular Function: P-P-bond-hydrolysis-driven protein transmembrane transporter activity (GO:0015450);; Cellular Component: outer membrane (GO:0019867);;	--	Protein TOC75-3, chloroplastic (Precursor) GN=T6H20.230 OS=Arabidopsis thaliana (Mouse-ear cress) PE=1 SV=1	Uncharacterized protein GN=PRUPE_ppa002062mg OS=Prunus persica (Peach) PE=4 SV=1	PREDICTED: protein TOC75-3, chloroplastic-like [Malus domestica]	PREDICTED: Malus x domestica protein TOC75-3, chloroplastic-like (LOC103420495), mRNA
CS2_vs_CS1	gene.MD03G1089300	0.00561277	-1.34351	down	--	--	--	--	Scarecrow-like protein 14 GN=SCL14 OS=Arabidopsis thaliana (Mouse-ear cress) PE=2 SV=2	Uncharacterized protein GN=PRUPE_ppa019574mg OS=Prunus persica (Peach) PE=4 SV=1	PREDICTED: scarecrow-like protein 14 [Malus domestica]	PREDICTED: Malus x domestica scarecrow-like protein 14 (LOC103420754), mRNA
CS2_vs_CS1	gene.MD03G1091100	3.69413e-09	1.88851	up	[E]	Amino acid transport and metabolism	Molecular Function: oxidoreductase activity, acting on CH-OH group of donors (GO:0016614);; Cellular Component: intracellular membrane-bounded organelle (GO:0043231);; Cellular Component: cytoplasmic part (GO:0044444);; Biological Process: single-organism metabolic process (GO:0044710);; Molecular Function: mandelonitrile lyase activity (GO:0046593);; Molecular Function: flavin adenine dinucleoti…	K08248|0.0|vvi:100254058|hypothetical protein LOC100254058	(R)-mandelonitrile lyase 3 (Precursor) GN=MDL3 OS=Prunus serotina (Black cherry) PE=2 SV=1	Uncharacterized protein GN=PRUPE_ppa022070mg OS=Prunus persica (Peach) PE=4 SV=1	PREDICTED: (R)-mandelonitrile lyase 2-like [Pyrus x bretschneideri]	PREDICTED: Pyrus x bretschneideri (R)-mandelonitrile lyase 2-like (LOC103954303), mRNA
CS2_vs_CS1	gene.MD03G1093500	3.74152e-28	-1.02973	down	--	--	Biological Process: amino acid transmembrane transport (GO:0003333);; Cellular Component: vacuole (GO:0005773);; Cellular Component: chloroplast outer membrane (GO:0009707);; Molecular Function: amino acid transmembrane transporter activity (GO:0015171);; Molecular Function: P-P-bond-hydrolysis-driven protein transmembrane transporter activity (GO:0015450);; Cellular Component: integral component…	--	Outer envelope pore protein 16, chloroplastic GN=OEP16 OS=Pisum sativum (Garden pea) PE=1 SV=1	Uncharacterized protein GN=PRUPE_ppa012989mg OS=Prunus persica (Peach) PE=4 SV=1	PREDICTED: outer envelope pore protein 16, chloroplastic [Malus domestica]	PREDICTED: Malus x domestica outer envelope pore protein 16, chloroplastic (LOC103420940), mRNA
CS2_vs_CS1	gene.MD03G1094700	9.84281e-75	-2.44719	down	--	--	--	--	Fasciclin-like arabinogalactan protein 4 (Precursor) GN=F12A12.70 OS=Arabidopsis thaliana (Mouse-ear cress) PE=1 SV=1	Uncharacterized protein (Fragment) GN=PRUPE_ppa023463mg OS=Prunus persica (Peach) PE=4 SV=1	PREDICTED: fasciclin-like arabinogalactan protein 4 [Pyrus x bretschneideri]	PREDICTED: Pyrus x bretschneideri fasciclin-like arabinogalactan protein 4 (LOC103933445), mRNA
CS2_vs_CS1	gene.MD03G1095100	3.63941e-09	1.04507	up	--	--	--	--	--	Uncharacterized protein GN=PRUPE_ppa008195mg OS=Prunus persica (Peach) PE=4 SV=1	PREDICTED: epsin-3-like [Malus domestica]	PREDICTED: Malus x domestica epsin-3-like (LOC103418810), mRNA
CS2_vs_CS1	gene.MD03G1095200	0.00129123	1.87464	up	[RTKL]	--	Molecular Function: nucleotide binding (GO:0000166);; Molecular Function: protein kinase activity (GO:0004672);; Biological Process: cellular protein modification process (GO:0006464);; Biological Process: phosphorylation (GO:0016310);;	--	Serine/threonine-protein kinase GN=PUB33 OS=Arabidopsis thaliana (Mouse-ear cress) PE=2 SV=2	Uncharacterized protein GN=PRUPE_ppa001475mg OS=Prunus persica (Peach) PE=4 SV=1	PREDICTED: U-box domain-containing protein 33-like isoform X1 [Malus domestica]	PREDICTED: Malus x domestica U-box domain-containing protein 33-like (LOC103418809), transcript variant X1, mRNA
CS2_vs_CS1	gene.MD03G1097600	4.99636e-09	3.13048	up	--	--	--	--	--	Uncharacterized protein (Fragment) GN=PRUPE_ppa014839mg OS=Prunus persica (Peach) PE=4 SV=1	PREDICTED: uncharacterized protein LOC103407738 [Malus domestica]	PREDICTED: Malus x domestica uncharacterized LOC103407738 (LOC103407738), mRNA
CS2_vs_CS1	gene.MD03G1098100	7.87179e-28	1.06298	up	--	--	Cellular Component: nucleosome (GO:0000786);; Molecular Function: DNA binding (GO:0003677);; Cellular Component: nucleus (GO:0005634);; Biological Process: nucleosome assembly (GO:0006334);; Molecular Function: protein heterodimerization activity (GO:0046982);;	K11251|9e-55|rcu:RCOM_0390180|histone h2a, putative	Probable histone H2A.3 OS=Medicago truncatula (Barrel medic) PE=1 SV=1	Uncharacterized protein GN=PRUPE_ppa012888mg OS=Prunus persica (Peach) PE=4 SV=1	PREDICTED: histone H2A-like [Malus domestica]	PREDICTED: Malus x domestica histone H2A-like (LOC103421370), mRNA
CS2_vs_CS1	gene.MD03G1102100	3.32239e-33	-3.40768	down	--	--	--	--	Copper transport protein ATX1 GN=ATX1 OS=Arabidopsis thaliana (Mouse-ear cress) PE=1 SV=1	Uncharacterized protein GN=PRUPE_ppa025925mg OS=Prunus persica (Peach) PE=4 SV=1	PREDICTED: uncharacterized protein LOC103418817 [Malus domestica]	PREDICTED: Malus x domestica uncharacterized LOC103418817 (LOC103418817), mRNA
CS2_vs_CS1	gene.MD03G1104900	3.2333e-138	-1.46176	down	[J]	Translation, ribosomal structure and biogenesis	Molecular Function: translation elongation factor activity (GO:0003746);; Molecular Function: GTPase activity (GO:0003924);; Molecular Function: GTP binding (GO:0005525);; Cellular Component: cytoplasm (GO:0005737);; Biological Process: obsolete GTP catabolic process (GO:0006184);; Biological Process: translational elongation (GO:0006414);;	K03231|0.0|zma:542581|EF1-A, EF1A	Elongation factor 1-alpha GN=EF1A OS=Zea mays (Maize) PE=3 SV=1	Uncharacterized protein GN=PRUPE_ppa005718mg OS=Prunus persica (Peach) PE=4 SV=1	PREDICTED: elongation factor 1-alpha [Malus domestica]	PREDICTED: Malus x domestica elongation factor 1-alpha (LOC103422071), mRNA
CS2_vs_CS1	gene.MD03G1105200	3.76032e-76	-1.42205	down	--	--	Molecular Function: single-stranded DNA 5'-3' exodeoxyribonuclease activity (GO:0045145);;	--	Exonuclease V, chloroplastic (Precursor) GN=At5g60370 OS=Arabidopsis thaliana (Mouse-ear cress) PE=2 SV=1	Putative uncharacterized protein GN=VITISV_002856 OS=Vitis vinifera (Grape) PE=2 SV=1	PREDICTED: exonuclease V, chloroplastic [Malus domestica]	PREDICTED: Malus x domestica exonuclease V, chloroplastic (LOC103422042), mRNA
CS2_vs_CS1	gene.MD03G1107900	3.69954e-17	1.08505	up	--	--	Biological Process: transcription, DNA-templated (GO:0006351);;	K09284|1e-146|rcu:RCOM_0328910|Protein AINTEGUMENTA, putative (EC:1.3.1.74)	Ethylene-responsive transcription factor RAP2-7 GN=T17D12.11 OS=Arabidopsis thaliana (Mouse-ear cress) PE=2 SV=2	Uncharacterized protein GN=PRUPE_ppa021782mg OS=Prunus persica (Peach) PE=4 SV=1	PREDICTED: ethylene-responsive transcription factor RAP2-7-like isoform X1 [Malus domestica]	PREDICTED: Malus x domestica ethylene-responsive transcription factor RAP2-7-like (LOC103421864), transcript variant X1, mRNA
CS2_vs_CS1	gene.MD03G1108400	0.000101931	1.04598	up	--	--	--	--	--	Uncharacterized protein GN=PRUPE_ppa011640mg OS=Prunus persica (Peach) PE=4 SV=1	PREDICTED: glycolipid transfer protein 1-like [Malus domestica]	PREDICTED: Malus x domestica glycolipid transfer protein 1-like (LOC103432138), mRNA
CS2_vs_CS1	gene.MD03G1108500	1.88908e-161	1.52545	up	[RTKL]	--	Biological Process: activation of MAPK activity involved in osmosensory signaling pathway (GO:0000169);; Molecular Function: MAP kinase activity (GO:0004707);; Molecular Function: ATP binding (GO:0005524);; Biological Process: response to oxidative stress (GO:0006979);; Biological Process: response to cold (GO:0009409);; Biological Process: response to wounding (GO:0009611);; Biological Process: …	K04371|0.0|pop:POPTR_833180|hypothetical protein	Mitogen-activated protein kinase 3 GN=MPK3 OS=Arabidopsis thaliana (Mouse-ear cress) PE=1 SV=2	Uncharacterized protein GN=PRUPE_ppa007370mg OS=Prunus persica (Peach) PE=4 SV=1	PREDICTED: mitogen-activated protein kinase 3-like [Malus domestica]	PREDICTED: Malus x domestica mitogen-activated protein kinase 3-like (LOC103421892), mRNA
CS2_vs_CS1	gene.MD03G1110300	1.67268e-241	2.23605	up	--	--	Cellular Component: integral component of membrane (GO:0016021);;	--	Tetraspanin-3 GN=TET3 OS=Arabidopsis thaliana (Mouse-ear cress) PE=2 SV=1	Uncharacterized protein GN=PRUPE_ppa009596mg OS=Prunus persica (Peach) PE=4 SV=1	PREDICTED: tetraspanin-3-like [Malus domestica]	PREDICTED: Malus x domestica tetraspanin-3-like (LOC103427184), mRNA
CS2_vs_CS1	gene.MD03G1111000	5.56965e-57	1.42345	up	--	--	--	--	--	Putative uncharacterized protein GN=VIT_06s0004g03370 OS=Vitis vinifera (Grape) PE=4 SV=1	PREDICTED: phosphatidylinositol transfer protein 1-like isoform X1 [Malus domestica]	PREDICTED: Malus x domestica phosphatidylinositol transfer protein 1-like (LOC103421981), transcript variant X1, mRNA
CS2_vs_CS1	gene.MD03G1111600	2.62072e-239	3.9142	up	--	--	--	--	LOB domain-containing protein 11 GN=T17D12.6 OS=Arabidopsis thaliana (Mouse-ear cress) PE=2 SV=2	Uncharacterized protein GN=PRUPE_ppa011528mg OS=Prunus persica (Peach) PE=4 SV=1	PREDICTED: LOB domain-containing protein 1-like [Malus domestica]	PREDICTED: Malus x domestica LOB domain-containing protein 1-like (LOC103427186), mRNA
CS2_vs_CS1	gene.MD03G1111700	2.40004e-84	-1.61172	down	[R]	General function prediction only	--	--	--	Uncharacterized protein GN=PRUPE_ppa005247mg OS=Prunus persica (Peach) PE=4 SV=1	PREDICTED: uncharacterized protein LOC103427185 [Malus domestica]	PREDICTED: Malus x domestica uncharacterized LOC103427185 (LOC103427185), mRNA
CS2_vs_CS1	gene.MD03G1112400	2.07209e-29	-1.14489	down	--	--	--	--	--	Uncharacterized protein GN=PRUPE_ppa000554mg OS=Prunus persica (Peach) PE=4 SV=1	PREDICTED: uncharacterized protein LOC103930649 [Pyrus x bretschneideri]	PREDICTED: Pyrus x bretschneideri uncharacterized LOC103930649 (LOC103930649), mRNA
CS2_vs_CS1	gene.MD03G1117600	0.00064453	1.01867	up	[RTKL]	--	Molecular Function: transferase activity, transferring phosphorus-containing groups (GO:0016772);;	--	Wall-associated receptor kinase-like 20 (Precursor) GN=WAKL20 OS=Arabidopsis thaliana (Mouse-ear cress) PE=2 SV=1	Putative uncharacterized protein GN=VIT_06s0004g02880 OS=Vitis vinifera (Grape) PE=4 SV=1	PREDICTED: protein kinase APK1A, chloroplastic-like isoform X3 [Malus domestica]	PREDICTED: Malus x domestica protein kinase APK1A, chloroplastic-like (LOC103422945), transcript variant X3, mRNA
CS2_vs_CS1	gene.MD03G1117900	5.85734e-05	1.03617	up	[G]	Carbohydrate transport and metabolism	Molecular Function: transporter activity (GO:0005215);; Biological Process: transport (GO:0006810);; Cellular Component: integral component of membrane (GO:0016021);;	--	Aquaporin PIP2-2 GN=T2N18.7 OS=Arabidopsis thaliana (Mouse-ear cress) PE=1 SV=2	Aquaporin PIP2 GN=PIP2;1 OS=Malus prunifolia PE=2 SV=1	PREDICTED: aquaporin PIP2-2 [Malus domestica]	PREDICTED: Malus x domestica aquaporin PIP2-2 (LOC103427215), mRNA
CS2_vs_CS1	gene.MD03G1123900	1.11389e-08	1.99183	up	[V]	Defense mechanisms	--	--	ABC transporter G family member 28 GN=MUP24.16 OS=Arabidopsis thaliana (Mouse-ear cress) PE=3 SV=1	Uncharacterized protein GN=PRUPE_ppa000761mg OS=Prunus persica (Peach) PE=4 SV=1	PREDICTED: ABC transporter G family member 28-like isoform X1 [Malus domestica]	PREDICTED: Malus x domestica ABC transporter G family member 28-like (LOC103423213), transcript variant X1, mRNA
CS2_vs_CS1	gene.MD03G1127300	2.49634e-07	-1.5952	down	[S]	Function unknown	--	--	TMV resistance protein N GN=N OS=Nicotiana glutinosa (Tobacco) PE=1 SV=1	Uncharacterized protein (Fragment) GN=PRUPE_ppa021808mg OS=Prunus persica (Peach) PE=4 SV=1	PREDICTED: disease resistance protein RML1B-like [Malus domestica]	PREDICTED: Pyrus x bretschneideri protein SUPPRESSOR OF npr1-1, CONSTITUTIVE 1-like (LOC103928642), mRNA
CS2_vs_CS1	gene.MD03G1130600	1.13068e-07	-2.71614	down	--	--	Molecular Function: translation initiation factor activity (GO:0003743);; Biological Process: translational initiation (GO:0006413);; Biological Process: petal development (GO:0048441);; Biological Process: stamen development (GO:0048443);; Biological Process: ovule development (GO:0048481);;	--	Protein argonaute 5 GN=AGO5 OS=Arabidopsis thaliana (Mouse-ear cress) PE=1 SV=2	Uncharacterized protein GN=PRUPE_ppa024131mg OS=Prunus persica (Peach) PE=4 SV=1	PREDICTED: protein argonaute 5-like [Malus domestica]	PREDICTED: Malus x domestica protein argonaute 5-like (LOC103423778), mRNA
CS2_vs_CS1	gene.MD03G1132200	6.79256e-11	-2.62767	down	--	--	--	--	--	--	PREDICTED: uncharacterized protein LOC103423924 [Malus domestica]	PREDICTED: Malus x domestica uncharacterized LOC103423924 (LOC103423924), mRNA
CS2_vs_CS1	gene.MD03G1134300	1.4131e-91	-1.10222	down	--	--	Biological Process: cellular process (GO:0009987);;	--	Histone deacetylase HDT1 GN=HDT1 OS=Glycine max (Soybean) PE=2 SV=1	Uncharacterized protein GN=PRUPE_ppa009583mg OS=Prunus persica (Peach) PE=4 SV=1	PREDICTED: histone deacetylase HDT1-like [Malus domestica]	PREDICTED: Malus x domestica histone deacetylase HDT1-like (LOC103418887), mRNA
CS2_vs_CS1	gene.MD03G1136700	6.45207e-12	1.10125	up	--	--	--	--	--	Uncharacterized protein GN=PRUPE_ppa021212mg OS=Prunus persica (Peach) PE=4 SV=1	PREDICTED: uncharacterized protein LOC103424100 isoform X1 [Malus domestica]	PREDICTED: Malus x domestica uncharacterized LOC103424100 (LOC103424100), transcript variant X1, mRNA
CS2_vs_CS1	gene.MD03G1138500	4.4367e-14	1.63087	up	[RTKL]	--	--	--	LRR receptor-like serine/threonine-protein kinase FLS2 (Precursor) GN=FLS2 OS=Arabidopsis thaliana (Mouse-ear cress) PE=1 SV=1	Uncharacterized protein (Fragment) GN=PRUPE_ppa016624mg OS=Prunus persica (Peach) PE=4 SV=1	PREDICTED: putative receptor-like protein kinase At3g47110 isoform X1 [Malus domestica]	PREDICTED: Malus x domestica putative receptor-like protein kinase At3g47110 (LOC103407821), transcript variant X1, mRNA
CS2_vs_CS1	gene.MD03G1148700	1.84941e-06	-1.06266	down	--	--	Biological Process: carotenoid biosynthetic process (GO:0016117);; Biological Process: carotene biosynthetic process (GO:0016120);; Molecular Function: oxidoreductase activity, acting on paired donors, with incorporation or reduction of molecular oxygen (GO:0016705);; Molecular Function: lycopene beta cyclase activity (GO:0045436);; Molecular Function: capsanthin synthase activity (GO:0052727);; …	K14593|0.0|rcu:RCOM_1282010|Capsanthin/capsorubin synthase, chloroplast precursor, putative (EC:5.3.99.8)	Capsanthin/capsorubin synthase, chromoplast (Precursor) GN=CCS OS=Citrus sinensis (Sweet orange) PE=3 SV=1	Uncharacterized protein GN=PRUPE_ppa004650mg OS=Prunus persica (Peach) PE=4 SV=1	PREDICTED: capsanthin/capsorubin synthase, chromoplastic-like [Malus domestica]	PREDICTED: Malus x domestica capsanthin/capsorubin synthase, chromoplastic-like (LOC103424693), mRNA
CS2_vs_CS1	gene.MD03G1150500	1.38894e-05	2.33313	up	--	--	--	K14332|1e-76|rcu:RCOM_1282260|hypothetical protein	--	Uncharacterized protein GN=PRUPE_ppa013064mg OS=Prunus persica (Peach) PE=4 SV=1	PREDICTED: photosystem I subunit O isoform X2 [Malus domestica]	PREDICTED: Malus x domestica photosystem I subunit O (LOC103424798), transcript variant X2, mRNA
CS2_vs_CS1	gene.MD03G1150600	1.69751e-50	1.82852	up	--	--	--	--	--	Uncharacterized protein GN=PRUPE_ppa023506mg OS=Prunus persica (Peach) PE=4 SV=1	PREDICTED: uncharacterized protein LOC103424822 [Malus domestica]	PREDICTED: Malus x domestica uncharacterized LOC103424822 (LOC103424822), mRNA
CS2_vs_CS1	gene.MD03G1153600	9.24499e-05	1.70986	up	[RTKL]	--	Molecular Function: nucleotide binding (GO:0000166);; Molecular Function: protein kinase activity (GO:0004672);;	K08857|0.0|vvi:100258125|hypothetical protein LOC100258125	Serine/threonine-protein kinase Nek5 GN=F26G5.150 OS=Arabidopsis thaliana (Mouse-ear cress) PE=1 SV=1	Uncharacterized protein GN=PRUPE_ppa021465mg OS=Prunus persica (Peach) PE=4 SV=1	PREDICTED: serine/threonine-protein kinase Nek5-like [Pyrus x bretschneideri]	PREDICTED: Pyrus x bretschneideri serine/threonine-protein kinase Nek5-like (LOC103940589), mRNA
CS2_vs_CS1	gene.MD03G1163900	1.12447e-09	1.05885	up	[RTKL]	--	Molecular Function: protein serine/threonine kinase activity (GO:0004674);; Molecular Function: ATP binding (GO:0005524);; Biological Process: protein phosphorylation (GO:0006468);;	--	Protein kinase 2B, chloroplastic (Precursor) GN=APK2B OS=Arabidopsis thaliana (Mouse-ear cress) PE=1 SV=1	Uncharacterized protein GN=PRUPE_ppa007298mg OS=Prunus persica (Peach) PE=4 SV=1	PREDICTED: protein kinase 2B, chloroplastic-like isoform X2 [Malus domestica]	PREDICTED: Malus x domestica protein kinase 2B, chloroplastic-like (LOC103426168), transcript variant X2, mRNA
CS2_vs_CS1	gene.MD03G1165900	0.00768428	-1.18239	down	[M]	Cell wall/membrane/envelope biogenesis	Biological Process: biosynthetic process (GO:0009058);; Molecular Function: transferase activity (GO:0016740);;	--	--	Uncharacterized protein GN=PRUPE_ppa004583mg OS=Prunus persica (Peach) PE=4 SV=1	PREDICTED: uncharacterized protein LOC103418016 [Malus domestica]	PREDICTED: Malus x domestica uncharacterized LOC103418016 (LOC103418016), mRNA
CS2_vs_CS1	gene.MD03G1166900	2.01788e-11	3.081	up	--	--	--	--	--	Uncharacterized protein GN=PRUPE_ppa017162mg OS=Prunus persica (Peach) PE=4 SV=1	PREDICTED: protein LATERAL ROOT PRIMORDIUM 1 [Malus domestica]	PREDICTED: Malus x domestica protein LATERAL ROOT PRIMORDIUM 1 (LOC103426737), mRNA
CS2_vs_CS1	gene.MD03G1168700	0	2.99989	up	[E]	Amino acid transport and metabolism	Molecular Function: catalytic activity (GO:0003824);; Biological Process: metabolic process (GO:0008152);; Molecular Function: pyridoxal phosphate binding (GO:0030170);;	K00830|0.0|pop:POPTR_815301|serine--glyoxylate transaminase (EC:2.6.1.45)	Serine--glyoxylate aminotransferase GN=AGT1 OS=Arabidopsis thaliana (Mouse-ear cress) PE=1 SV=2	Uncharacterized protein GN=PRUPE_ppa006653mg OS=Prunus persica (Peach) PE=4 SV=1	PREDICTED: serine--glyoxylate aminotransferase [Malus domestica]	PREDICTED: Malus x domestica serine--glyoxylate aminotransferase (LOC103427269), transcript variant X2, mRNA
CS2_vs_CS1	gene.MD03G1170900	3.18604e-18	1.11812	up	[R]	General function prediction only	--	K06961|3e-14|pop:POPTR_719150|hypothetical protein	--	KRR1 small subunit processome component OS=Musa acuminata subsp. malaccensis (Wild banana) PE=3 SV=1	PREDICTED: uncharacterized protein LOC103426964 isoform X1 [Malus domestica]	PREDICTED: Malus x domestica uncharacterized LOC103426964 (LOC103426964), transcript variant X1, mRNA
CS2_vs_CS1	gene.MD03G1172800	1.05092e-55	-1.20895	down	[MG]	--	Molecular Function: catalytic activity (GO:0003824);; Biological Process: cellular metabolic process (GO:0044237);; Molecular Function: coenzyme binding (GO:0050662);;	--	Cinnamoyl-CoA reductase 1 GN=T24D18.5 OS=Arabidopsis thaliana (Mouse-ear cress) PE=1 SV=1	Putative cinnamyl alcohol dehydrogenase GN=CAD OS=Malus domestica (Apple) PE=2 SV=1	PREDICTED: cinnamoyl-CoA reductase 1 [Malus domestica]	PREDICTED: Malus x domestica cinnamoyl-CoA reductase 1 (LOC103427062), mRNA
CS2_vs_CS1	gene.MD03G1173200	3.03061e-136	5.00973	up	--	--	--	--	Isoeugenol synthase 1 GN=IGS1 OS=Petunia hybrida (Petunia) PE=1 SV=1	Eugenol synthase GN=EGS1 OS=Rosa chinensis (China rose) PE=2 SV=1	PREDICTED: isoeugenol synthase 1-like [Pyrus x bretschneideri]	PREDICTED: Pyrus x bretschneideri isoeugenol synthase 1-like (LOC103959074), mRNA
CS2_vs_CS1	gene.MD03G1173400	0.00128728	-1.37922	down	--	--	--	--	--	Uncharacterized protein OS=Glycine max (Soybean) PE=4 SV=1	PREDICTED: uncharacterized protein LOC103959075 [Pyrus x bretschneideri]	PREDICTED: Malus x domestica uncharacterized LOC103399998 (LOC103399998), ncRNA
CS2_vs_CS1	gene.MD03G1177200	2.54044e-25	-1.2184	down	[F]	Nucleotide transport and metabolism	--	K00106|0.0|rcu:RCOM_1577610|xanthine dehydrogenase, putative (EC:1.17.3.2)	Xanthine dehydrogenase 1 GN=XDH1 OS=Arabidopsis thaliana (Mouse-ear cress) PE=1 SV=1	Uncharacterized protein GN=PRUPE_ppa000271mg OS=Prunus persica (Peach) PE=4 SV=1	PREDICTED: xanthine dehydrogenase 1-like isoform X3 [Malus domestica]	PREDICTED: Malus x domestica xanthine dehydrogenase 1-like (LOC103447973), transcript variant X4, mRNA
CS2_vs_CS1	gene.MD03G1180200	9.7281e-05	1.13557	up	--	--	--	--	Nucleobase-ascorbate transporter 2 GN=NAT2 OS=Arabidopsis thaliana (Mouse-ear cress) PE=2 SV=2	Uncharacterized protein GN=Solyc02g072500.2 OS=Solanum lycopersicum (Tomato) PE=4 SV=1	nucleobase-ascorbate transporter 4 [Malus domestica]	PREDICTED: Malus x domestica uncharacterized LOC103440236 (LOC103440236), ncRNA
CS2_vs_CS1	gene.MD03G1183400	3.9893e-17	2.06599	up	[B]	Chromatin structure and dynamics	Molecular Function: DNA binding (GO:0003677);; Cellular Component: intracellular (GO:0005622);;	--	Nuclear transcription factor Y subunit B-3 OS=Arabidopsis thaliana (Mouse-ear cress) PE=2 SV=1	Uncharacterized protein GN=PRUPE_ppa011714mg OS=Prunus persica (Peach) PE=4 SV=1	PREDICTED: nuclear transcription factor Y subunit B-3-like [Malus domestica]	PREDICTED: Malus x domestica nuclear transcription factor Y subunit B-3-like (LOC103439543), mRNA
CS2_vs_CS1	gene.MD03G1188200	3.02191e-10	1.74925	up	[V]	Defense mechanisms	--	--	ABC transporter C family member 3 GN=MJG19.3 OS=Arabidopsis thaliana (Mouse-ear cress) PE=1 SV=1	Uncharacterized protein (Fragment) GN=PRUPE_ppa014637mg OS=Prunus persica (Peach) PE=4 SV=1	PREDICTED: ABC transporter C family member 3-like [Malus domestica]	PREDICTED: Malus x domestica ABC transporter C family member 3-like (LOC103448328), mRNA
CS2_vs_CS1	gene.MD03G1198900	1.04673e-07	1.16377	up	[EH]	--	Molecular Function: oxidoreductase activity, acting on a sulfur group of donors, disulfide as acceptor (GO:0016671);; Biological Process: sulfate reduction (GO:0019419);; Biological Process: cell redox homeostasis (GO:0045454);;	--	5&apos;-adenylylsulfate reductase 1, chloroplastic (Precursor) GN=F4H6.13 OS=Arabidopsis thaliana (Mouse-ear cress) PE=1 SV=2	Uncharacterized protein GN=PRUPE_ppa005352mg OS=Prunus persica (Peach) PE=4 SV=1	PREDICTED: 5&apos;-adenylylsulfate reductase 3, chloroplastic-like [Pyrus x bretschneideri]	PREDICTED: Pyrus x bretschneideri 5'-adenylylsulfate reductase 3, chloroplastic-like (LOC103951376), mRNA
CS2_vs_CS1	gene.MD03G1200500	1.64992e-21	1.18527	up	[RTKL]	--	Molecular Function: calmodulin-dependent protein kinase activity (GO:0004683);; Molecular Function: calcium ion binding (GO:0005509);; Molecular Function: ATP binding (GO:0005524);; Biological Process: protein phosphorylation (GO:0006468);;	K13412|0.0|rcu:RCOM_0082230|calcium-dependent protein kinase, putative (EC:2.7.11.17)	Calcium-dependent protein kinase 9 GN=CPK9 OS=Arabidopsis thaliana (Mouse-ear cress) PE=1 SV=1	Uncharacterized protein GN=PRUPE_ppa003830mg OS=Prunus persica (Peach) PE=4 SV=1	PREDICTED: calcium-dependent protein kinase 2 [Malus domestica]	PREDICTED: Malus x domestica calcium-dependent protein kinase 2 (LOC103428709), mRNA
CS2_vs_CS1	gene.MD03G1203700	1.0423e-07	2.14936	up	--	--	Molecular Function: GTPase activity (GO:0003924);; Molecular Function: calcium ion binding (GO:0005509);; Molecular Function: GTP binding (GO:0005525);; Cellular Component: endosome (GO:0005768);; Biological Process: obsolete GTP catabolic process (GO:0006184);; Biological Process: protein targeting to vacuole (GO:0006623);; Biological Process: endocytosis (GO:0006897);; Biological Process: membr…	--	--	Uncharacterized protein GN=PRUPE_ppa003834mg OS=Prunus persica (Peach) PE=4 SV=1	PREDICTED: EH domain-containing protein 1-like [Malus domestica]	PREDICTED: Malus x domestica EH domain-containing protein 1-like (LOC103434014), mRNA
CS2_vs_CS1	gene.MD03G1207700	4.59808e-09	-1.03489	down	--	--	Biological Process: pentose-phosphate shunt (GO:0006098);; Biological Process: phosphatidylglycerol biosynthetic process (GO:0006655);; Cellular Component: chloroplast stroma (GO:0009570);; Biological Process: isopentenyl diphosphate biosynthetic process, methylerythritol 4-phosphate pathway (GO:0019288);; Biological Process: granum assembly (GO:0090391);;	--	Protein LHCP TRANSLOCATION DEFECT (Precursor) GN=F8A12.12 OS=Arabidopsis thaliana (Mouse-ear cress) PE=1 SV=1	Uncharacterized protein GN=PRUPE_ppa012342mg OS=Prunus persica (Peach) PE=4 SV=1	PREDICTED: protein LHCP TRANSLOCATION DEFECT [Malus domestica]	PREDICTED: Malus x domestica protein LHCP TRANSLOCATION DEFECT (LOC103429087), mRNA
CS2_vs_CS1	gene.MD03G1211300	1.10543e-67	1.13621	up	--	--	--	K08770|0.0|vvi:100267431|similar to polyubiquitin	NEDD8-like protein RUB2 (Precursor) GN=T20F21.24 OS=Arabidopsis thaliana (Mouse-ear cress) PE=1 SV=3	Polyubiquitin-A GN=TRIUR3_08047 OS=Triticum urartu (Red wild einkorn) PE=4 SV=1	polyubiquitin (ubq10) [Arabidopsis thaliana]	PREDICTED: Pyrus x bretschneideri polyubiquitin (LOC103935043), transcript variant X3, mRNA
CS2_vs_CS1	gene.MD03G1212900	8.32475e-281	2.46524	up	[Z]	Cytoskeleton	Molecular Function: microtubule motor activity (GO:0003777);; Molecular Function: ATP binding (GO:0005524);; Cellular Component: nucleus (GO:0005634);; Cellular Component: cytoplasm (GO:0005737);; Cellular Component: kinesin complex (GO:0005871);; Cellular Component: microtubule (GO:0005874);; Biological Process: microtubule-based movement (GO:0007018);; Molecular Function: microtubule binding (G…	K10405|0.0|vvi:100248639|hypothetical protein LOC100248639	Kinesin-3 OS=Arabidopsis thaliana (Mouse-ear cress) PE=2 SV=1	Uncharacterized protein GN=PRUPE_ppa002138mg OS=Prunus persica (Peach) PE=4 SV=1	PREDICTED: kinesin-3-like [Malus domestica]	PREDICTED: Malus x domestica kinesin-3-like (LOC103419009), mRNA
CS2_vs_CS1	gene.MD03G1213000	3.2557e-24	2.95074	up	--	--	--	--	--	--	--	PREDICTED: Malus x domestica uncharacterized LOC103429362 (LOC103429362), ncRNA
CS2_vs_CS1	gene.MD03G1214100	1.67172e-92	-5.29422	down	[MG]	--	Molecular Function: catalytic activity (GO:0003824);; Biological Process: cellular metabolic process (GO:0044237);; Molecular Function: coenzyme binding (GO:0050662);;	--	Dihydroflavonol-4-reductase GN=MJB21.18 OS=Arabidopsis thaliana (Mouse-ear cress) PE=2 SV=2	Uncharacterized protein GN=PRUPE_ppa008011mg OS=Prunus persica (Peach) PE=4 SV=1	PREDICTED: dihydroflavonol-4-reductase-like isoform X1 [Malus domestica]	PREDICTED: Malus x domestica dihydroflavonol-4-reductase-like (LOC103429408), transcript variant X1, mRNA
CS2_vs_CS1	gene.MD03G1214200	3.01709e-54	-1.14686	down	[IQR]	--	Molecular Function: nucleotide binding (GO:0000166);; Molecular Function: 3-oxoacyl-[acyl-carrier-protein] reductase (NADPH) activity (GO:0004316);; Biological Process: response to arsenic-containing substance (GO:0046685);; Biological Process: oxidation-reduction process (GO:0055114);;	K00059|1e-116|rcu:RCOM_1121790|short-chain type dehydrogenase, putative (EC:1.1.1.100)	Short-chain type dehydrogenase/reductase OS=Picea abies (Norway spruce) PE=2 SV=1	Short-chain type dehydrogenase, putative GN=RCOM_1121790 OS=Ricinus communis (Castor bean) PE=4 SV=1	PREDICTED: short-chain type dehydrogenase/reductase-like [Malus domestica]	PREDICTED: Malus x domestica short-chain type dehydrogenase/reductase-like (LOC103429415), mRNA
CS2_vs_CS1	gene.MD03G1214400	2.88665e-33	1.41432	up	[RTKL]	--	Molecular Function: protein serine/threonine kinase activity (GO:0004674);; Molecular Function: ATP binding (GO:0005524);; Biological Process: protein phosphorylation (GO:0006468);;	--	Probable leucine-rich repeat receptor-like serine/threonine-protein kinase At5g15730 GN=At5g15730 OS=Arabidopsis thaliana (Mouse-ear cress) PE=2 SV=1	Uncharacterized protein GN=PRUPE_ppa006054mg OS=Prunus persica (Peach) PE=4 SV=1	PREDICTED: calcium/calmodulin-regulated receptor-like kinase 1 [Malus domestica]	PREDICTED: Malus x domestica calcium/calmodulin-regulated receptor-like kinase 1 (LOC103429434), transcript variant X2, mRNA
CS2_vs_CS1	gene.MD03G1215100	8.57987e-54	-2.22109	down	--	--	--	--	--	Uncharacterized protein GN=PRUPE_ppa013389mg OS=Prunus persica (Peach) PE=4 SV=1	PREDICTED: uncharacterized protein LOC103429487 [Malus domestica]	PREDICTED: Malus x domestica uncharacterized LOC103429487 (LOC103429487), mRNA
CS2_vs_CS1	gene.MD03G1215300	5.80255e-30	-2.36829	down	[G]	Carbohydrate transport and metabolism	Molecular Function: hydrolase activity, hydrolyzing O-glycosyl compounds (GO:0004553);; Biological Process: carbohydrate metabolic process (GO:0005975);;	--	Putative beta-glucosidase 41 (Precursor) GN=BGLU41 OS=Arabidopsis thaliana (Mouse-ear cress) PE=3 SV=2	Putative uncharacterized protein GN=VIT_19s0014g04750 OS=Vitis vinifera (Grape) PE=3 SV=1	PREDICTED: putative beta-glucosidase 41 isoform X1 [Malus domestica]	PREDICTED: Malus x domestica putative beta-glucosidase 41 (LOC103429506), transcript variant X1, mRNA
CS2_vs_CS1	gene.MD03G1217600	2.00175e-42	-1.51899	down	--	--	Molecular Function: structural molecule activity (GO:0005198);;	--	Vesicle-associated protein 4-1 GN=MJP23.9 OS=Arabidopsis thaliana (Mouse-ear cress) PE=2 SV=1	Uncharacterized protein GN=PRUPE_ppa010173mg OS=Prunus persica (Peach) PE=4 SV=1	PREDICTED: vesicle-associated protein 4-1-like [Malus domestica]	PREDICTED: Malus x domestica vesicle-associated protein 4-1-like (LOC103429960), mRNA
CS2_vs_CS1	gene.MD03G1235500	1.68639e-26	2.22981	up	--	--	--	--	--	Uncharacterized protein GN=PRUPE_ppa014990mg OS=Prunus persica (Peach) PE=4 SV=1	PREDICTED: uncharacterized protein LOC103427337 [Malus domestica]	PREDICTED: Malus x domestica uncharacterized LOC103427337 (LOC103427337), mRNA
CS2_vs_CS1	gene.MD03G1239100	1.7581e-05	1.17429	up	--	--	--	--	Transcription factor TCP4 GN=K15M2.17 OS=Arabidopsis thaliana (Mouse-ear cress) PE=2 SV=1	MdTCP4B protein GN=MdTCP4B OS=Malus domestica (Apple) PE=2 SV=1	MdTCP4B [Malus domestica]	Malus x domestica MdTCP4B mRNA, complete cds
CS2_vs_CS1	gene.MD03G1239400	6.57307e-53	1.30808	up	[S]	Function unknown	Molecular Function: nucleotide binding (GO:0000166);; Biological Process: cellular process (GO:0009987);; Molecular Function: nucleoside-triphosphatase activity (GO:0017111);; Biological Process: primary metabolic process (GO:0044238);; Molecular Function: peptidase activity, acting on L-amino acid peptides (GO:0070011);; Biological Process: organic substance metabolic process (GO:0071704);;	--	Uncharacterized protein ycf45 GN=ycf45 OS=Porphyra purpurea (Red seaweed) PE=3 SV=1	Uncharacterized protein GN=PRUPE_ppa003461mg OS=Prunus persica (Peach) PE=4 SV=1	PREDICTED: uncharacterized protein ycf45-like [Malus domestica]	PREDICTED: Malus x domestica uncharacterized protein ycf45-like (LOC108170687), mRNA
CS2_vs_CS1	gene.MD03G1242400	4.65764e-10	1.9208	up	--	--	--	--	Epidermis-specific secreted glycoprotein EP1 (Precursor) GN=EP1 OS=Daucus carota (Carrot) PE=1 SV=1	Putative uncharacterized protein GN=VIT_19s0014g01370 OS=Vitis vinifera (Grape) PE=4 SV=1	PREDICTED: epidermis-specific secreted glycoprotein EP1-like [Malus domestica]	PREDICTED: Malus x domestica epidermis-specific secreted glycoprotein EP1-like (LOC103431581), mRNA
CS2_vs_CS1	gene.MD03G1242500	5.68137e-26	1.16671	up	--	--	Cellular Component: glycine cleavage complex (GO:0005960);; Biological Process: glycine catabolic process (GO:0006546);;	--	--	Uncharacterized protein GN=PRUPE_ppa016051mg OS=Prunus persica (Peach) PE=4 SV=1	PREDICTED: protein Simiate [Malus domestica]	PREDICTED: Malus x domestica protein Simiate (LOC103431588), transcript variant X2, misc_RNA
CS2_vs_CS1	gene.MD03G1242600	2.13892e-62	-2.16647	down	--	--	--	--	--	Uncharacterized protein GN=PRUPE_ppa012057mg OS=Prunus persica (Peach) PE=4 SV=1	PREDICTED: protein LIGHT-DEPENDENT SHORT HYPOCOTYLS 10 [Malus domestica]	PREDICTED: Malus x domestica protein LIGHT-DEPENDENT SHORT HYPOCOTYLS 10 (LOC103431611), mRNA
CS2_vs_CS1	gene.MD03G1243000	1.13447e-07	-1.26003	down	--	--	--	--	Peptide-N4-(N-acetyl-beta-glucosaminyl)asparagine amidase A heavy chain OS=Prunus dulcis (Almond) PE=1 SV=2	Uncharacterized protein GN=PRUPE_ppa003073mg OS=Prunus persica (Peach) PE=4 SV=1	PREDICTED: LOW QUALITY PROTEIN: peptide-N4-(N-acetyl-beta-glucosaminyl)asparagine amidase A-like [Malus domestica]	PREDICTED: Malus x domestica peptide-N4-(N-acetyl-beta-glucosaminyl)asparagine amidase A-like (LOC103444877), misc_RNA
CS2_vs_CS1	gene.MD03G1243300	0.00311209	-1.08076	down	--	--	Molecular Function: peptide-N4-(N-acetyl-beta-glucosaminyl)asparagine amidase activity (GO:0000224);;	--	Peptide-N4-(N-acetyl-beta-glucosaminyl)asparagine amidase A heavy chain OS=Prunus dulcis (Almond) PE=1 SV=2	Uncharacterized protein GN=PRUPE_ppa003073mg OS=Prunus persica (Peach) PE=4 SV=1	PREDICTED: peptide-N4-(N-acetyl-beta-glucosaminyl)asparagine amidase A-like [Malus domestica]	PREDICTED: Malus x domestica peptide-N4-(N-acetyl-beta-glucosaminyl)asparagine amidase A-like (LOC103431620), mRNA
CS2_vs_CS1	gene.MD03G1243600	0.00512287	-1.04305	down	--	--	--	--	--	Uncharacterized protein GN=PRUPE_ppa026352mg OS=Prunus persica (Peach) PE=4 SV=1	PREDICTED: uncharacterized protein LOC103444881 [Malus domestica]	PREDICTED: Malus x domestica uncharacterized LOC103444881 (LOC103444881), mRNA
CS2_vs_CS1	gene.MD03G1250300	1.89801e-11	2.64766	up	[G]	Carbohydrate transport and metabolism	Molecular Function: alpha,alpha-trehalose-phosphate synthase (UDP-forming) activity (GO:0003825);; Molecular Function: trehalose-phosphatase activity (GO:0004805);; Biological Process: trehalose biosynthetic process (GO:0005992);;	K00697|0.0|pop:POPTR_828543|trehalose-6-phosphate synthase	Alpha,alpha-trehalose-phosphate synthase [UDP-forming] 1 GN=TPS1 OS=Arabidopsis thaliana (Mouse-ear cress) PE=1 SV=1	Uncharacterized protein GN=PRUPE_ppa001048mg OS=Prunus persica (Peach) PE=4 SV=1	PREDICTED: alpha,alpha-trehalose-phosphate synthase [UDP-forming] 1-like isoform X1 [Malus domestica]	PREDICTED: Malus x domestica alpha,alpha-trehalose-phosphate synthase [UDP-forming] 1-like (LOC103431945), transcript variant X2, mRNA
CS2_vs_CS1	gene.MD03G1251200	0.00554867	-1.90507	down	[R]	General function prediction only	Biological Process: sodium ion transport (GO:0006814);; Molecular Function: bile acid:sodium symporter activity (GO:0008508);; Cellular Component: membrane (GO:0016020);;	K03453|0.0|rcu:RCOM_0494130|sodium-bile acid cotransporter, putative	Probable sodium/metabolite cotransporter BASS1, chloroplastic (Precursor) GN=T30F21.11 OS=Arabidopsis thaliana (Mouse-ear cress) PE=2 SV=1	Sodium-bile acid cotransporter, putative GN=RCOM_0494130 OS=Ricinus communis (Castor bean) PE=4 SV=1	PREDICTED: probable sodium/metabolite cotransporter BASS1, chloroplastic isoform X1 [Malus domestica]	PREDICTED: Malus x domestica probable sodium/metabolite cotransporter BASS1, chloroplastic (LOC103427368), transcript variant X1, mRNA
CS2_vs_CS1	gene.MD03G1251900	9.3671e-20	-1.31809	down	[O]	Posttranslational modification, protein turnover, chaperones	Molecular Function: peptide-methionine (S)-S-oxide reductase activity (GO:0008113);; Cellular Component: chloroplast stroma (GO:0009570);; Molecular Function: peptide-methionine (R)-S-oxide reductase activity (GO:0033743);; Biological Process: oxidation-reduction process (GO:0055114);;	--	Peptide methionine sulfoxide reductase B1, chloroplastic (Precursor) GN=MSRB1 OS=Arabidopsis thaliana (Mouse-ear cress) PE=1 SV=1	Uncharacterized protein GN=PRUPE_ppa011768mg OS=Prunus persica (Peach) PE=4 SV=1	PREDICTED: peptide methionine sulfoxide reductase B1, chloroplastic [Malus domestica]	PREDICTED: Malus x domestica peptide methionine sulfoxide reductase B1, chloroplastic (LOC103432074), mRNA
CS2_vs_CS1	gene.MD03G1259900	6.61661e-60	1.83476	up	[P]	Inorganic ion transport and metabolism	Molecular Function: secondary active sulfate transmembrane transporter activity (GO:0008271);; Biological Process: sulfate transport (GO:0008272);; Cellular Component: integral component of membrane (GO:0016021);; Biological Process: transmembrane transport (GO:0055085);;	--	Sulfate transporter 3.1 OS=Arabidopsis thaliana (Mouse-ear cress) PE=2 SV=1	Uncharacterized protein GN=PRUPE_ppa002556mg OS=Prunus persica (Peach) PE=4 SV=1	PREDICTED: LOW QUALITY PROTEIN: sulfate transporter 3.1 [Malus domestica]	PREDICTED: Malus x domestica sulfate transporter 3.1 (LOC103432413), mRNA
CS2_vs_CS1	gene.MD03G1260000	0.000271438	1.26295	up	--	--	--	--	--	Uncharacterized protein GN=PRUPE_ppa006735mg OS=Prunus persica (Peach) PE=4 SV=1	PREDICTED: putative nuclease HARBI1 [Malus domestica]	PREDICTED: Malus x domestica putative nuclease HARBI1 (LOC103448962), mRNA
CS2_vs_CS1	gene.MD03G1268300	7.9899e-19	-1.74426	down	[R]	General function prediction only	Molecular Function: adenyl nucleotide binding (GO:0030554);;	--	Putative DUF21 domain-containing protein At1g03270 GN=CBSDUF4 OS=Arabidopsis thaliana (Mouse-ear cress) PE=4 SV=2	Uncharacterized protein GN=PRUPE_ppa005128mg OS=Prunus persica (Peach) PE=4 SV=1	PREDICTED: DUF21 domain-containing protein At4g14240-like [Pyrus x bretschneideri]	PREDICTED: Pyrus x bretschneideri DUF21 domain-containing protein At4g14240-like (LOC103939347), transcript variant X2, misc_RNA
CS2_vs_CS1	gene.MD03G1270200	9.02763e-92	1.29572	up	--	--	--	--	--	Uncharacterized protein GN=PRUPE_ppa008230mg OS=Prunus persica (Peach) PE=4 SV=1	PREDICTED: mitochondrial ubiquitin ligase activator of NFKB 1 [Malus domestica]	PREDICTED: Malus x domestica mitochondrial ubiquitin ligase activator of NFKB 1 (LOC103449075), mRNA
CS2_vs_CS1	gene.MD03G1272500	0	-4.89638	down	[GEPR]	--	--	--	Sugar transporter ERD6-like 7 GN=At2g48020 OS=Arabidopsis thaliana (Mouse-ear cress) PE=2 SV=2	Uncharacterized protein GN=PRUPE_ppa005144mg OS=Prunus persica (Peach) PE=4 SV=1	PREDICTED: sugar transporter ERD6-like 7 [Malus domestica]	PREDICTED: Malus x domestica sugar transporter ERD6-like 7 (LOC103432469), mRNA
CS2_vs_CS1	gene.MD03G1272600	7.29771e-13	-1.4298	down	[RTKL]	--	--	--	Probable LRR receptor-like serine/threonine-protein kinase RKF3 (Precursor) GN=T9J23.16 OS=Arabidopsis thaliana (Mouse-ear cress) PE=1 SV=1	Uncharacterized protein GN=PRUPE_ppa004277mg OS=Prunus persica (Peach) PE=4 SV=1	PREDICTED: probable LRR receptor-like serine/threonine-protein kinase RKF3 [Malus domestica]	PREDICTED: Malus x domestica probable LRR receptor-like serine/threonine-protein kinase RKF3 (LOC103432470), mRNA
CS2_vs_CS1	gene.MD03G1273000	3.44714e-24	-3.16455	down	--	--	Molecular Function: kinase activity (GO:0016301);; Biological Process: phosphorylation (GO:0016310);; Molecular Function: 2-alkenal reductase [NAD(P)] activity (GO:0032440);; Biological Process: oxidation-reduction process (GO:0055114);;	--	DNA-damage-repair/toleration protein DRT100 (Precursor) OS=Arabidopsis thaliana (Mouse-ear cress) PE=2 SV=2	Uncharacterized protein GN=PRUPE_ppa018962mg OS=Prunus persica (Peach) PE=4 SV=1	PREDICTED: LRR receptor-like serine/threonine-protein kinase ERECTA [Malus domestica]	PREDICTED: Malus x domestica LRR receptor-like serine/threonine-protein kinase ERECTA (LOC103432474), mRNA
CS2_vs_CS1	gene.MD03G1278200	4.63887e-98	1.18995	up	[O]	Posttranslational modification, protein turnover, chaperones	--	--	--	Uncharacterized protein GN=PRUPE_ppa008753mg OS=Prunus persica (Peach) PE=4 SV=1	PREDICTED: OTU domain-containing protein 6B [Pyrus x bretschneideri]	PREDICTED: Pyrus x bretschneideri OTU domain-containing protein 6B (LOC103967385), transcript variant X3, mRNA
CS2_vs_CS1	gene.MD03G1286100	3.97173e-07	-1.03125	down	[R]	General function prediction only	Molecular Function: nucleotide binding (GO:0000166);; Biological Process: mRNA splicing, via spliceosome (GO:0000398);; Biological Process: RNA methylation (GO:0001510);; Biological Process: protein maturation (GO:0051604);; Cellular Component: Cul4-RING E3 ubiquitin ligase complex (GO:0080008);;	--	Lissencephaly-1 homolog GN=PHATRDRAFT_17300 OS=Phaeodactylum tricornutum (strain CCAP 1055/1) PE=3 SV=1	Putative uncharacterized protein GN=VIT_07s0005g00240 OS=Vitis vinifera (Grape) PE=4 SV=1	PREDICTED: WD repeat-containing protein 89 homolog [Malus domestica]	PREDICTED: Malus x domestica WD repeat-containing protein 89 homolog (LOC103432580), mRNA
CS2_vs_CS1	gene.MD03G1286600	3.00111e-33	-1.48983	down	--	--	Molecular Function: ubiquitin-protein transferase activity (GO:0004842);; Biological Process: phosphate ion transport (GO:0006817);; Molecular Function: zinc ion binding (GO:0008270);; Biological Process: plant-type hypersensitive response (GO:0009626);; Biological Process: systemic acquired resistance (GO:0009627);; Biological Process: salicylic acid biosynthetic process (GO:0009697);; Biologica…	--	Probable E3 ubiquitin-protein ligase BAH1-like 1 GN=OsI_27296 OS=Oryza sativa subsp. indica (Rice) PE=2 SV=1	Uncharacterized protein GN=PRUPE_ppa008798mg OS=Prunus persica (Peach) PE=4 SV=1	PREDICTED: probable E3 ubiquitin-protein ligase BAH1-like 2 [Malus domestica]	PREDICTED: Malus x domestica probable E3 ubiquitin-protein ligase BAH1-like 2 (LOC103432583), mRNA
CS2_vs_CS1	gene.MD03G1286800	0.000188106	-1.92801	down	--	--	Molecular Function: ubiquitin-protein transferase activity (GO:0004842);; Cellular Component: nucleus (GO:0005634);; Biological Process: phosphate ion transport (GO:0006817);; Molecular Function: zinc ion binding (GO:0008270);; Biological Process: plant-type hypersensitive response (GO:0009626);; Biological Process: systemic acquired resistance (GO:0009627);; Biological Process: salicylic acid bi…	--	E3 ubiquitin-protein ligase BAH1 GN=F22D16.14 OS=Arabidopsis thaliana (Mouse-ear cress) PE=1 SV=1	Uncharacterized protein GN=PRUPE_ppa008798mg OS=Prunus persica (Peach) PE=4 SV=1	PREDICTED: probable E3 ubiquitin-protein ligase BAH1-like 1 [Malus domestica]	PREDICTED: Malus x domestica probable E3 ubiquitin-protein ligase BAH1-like 1 (LOC103419162), mRNA
CS2_vs_CS1	gene.MD03G1287400	5.9415e-128	1.21719	up	--	--	Molecular Function: nucleotide binding (GO:0000166);; Molecular Function: nucleic acid binding (GO:0003676);; Molecular Function: ubiquitin-protein transferase activity (GO:0004842);; Biological Process: ubiquitin-dependent protein catabolic process (GO:0006511);; Biological Process: red, far-red light phototransduction (GO:0009585);; Biological Process: regulation of photomorphogenesis (GO:00100…	--	Phytochrome A-associated F-box protein GN=EID1 OS=Arabidopsis thaliana (Mouse-ear cress) PE=1 SV=2	Uncharacterized protein (Fragment) GN=PRUPE_ppa017065mg OS=Prunus persica (Peach) PE=4 SV=1	PREDICTED: phytochrome A-associated F-box protein-like [Malus domestica]	PREDICTED: Malus x domestica phytochrome A-associated F-box protein-like (LOC103432590), mRNA
CS2_vs_CS1	gene.MD03G1288700	3.47691e-54	-1.00326	down	[L]	Replication, recombination and repair	Molecular Function: deoxyribodipyrimidine photo-lyase activity (GO:0003904);; Biological Process: DNA repair (GO:0006281);;	--	Blue-light photoreceptor PHR2 GN=PHR2 OS=Arabidopsis thaliana (Mouse-ear cress) PE=2 SV=2	Uncharacterized protein GN=PRUPE_ppa005477mg OS=Prunus persica (Peach) PE=4 SV=1	PREDICTED: LOW QUALITY PROTEIN: blue-light photoreceptor PHR2 [Malus domestica]	PREDICTED: Malus x domestica blue-light photoreceptor PHR2 (LOC103432598), mRNA
CS2_vs_CS1	gene.MD03G1289900	4.24887e-121	2.01208	up	--	--	--	--	Indole-3-acetic acid-induced protein ARG2 GN=ARG2 OS=Vigna radiata var. radiata (Mung bean) PE=2 SV=1	Uncharacterized protein GN=PRUPE_ppa013814mg OS=Prunus persica (Peach) PE=4 SV=1	PREDICTED: indole-3-acetic acid-induced protein ARG2-like [Pyrus x bretschneideri]	PREDICTED: Malus x domestica indole-3-acetic acid-induced protein ARG2 (LOC103432606), mRNA
CS2_vs_CS1	gene.MD03G1290100	2.39059e-73	-1.87577	down	--	--	--	--	--	Uncharacterized protein GN=PRUPE_ppa020728mg OS=Prunus persica (Peach) PE=4 SV=1	PREDICTED: uncharacterized protein At5g01610-like [Malus domestica]	PREDICTED: Malus x domestica uncharacterized protein At5g01610-like (LOC103419164), mRNA
CS2_vs_CS1	gene.MD03G1292200	2.6137e-103	1.14482	up	[T]	Signal transduction mechanisms	Molecular Function: phosphorelay sensor kinase activity (GO:0000155);; Biological Process: phosphorelay signal transduction system (GO:0000160);; Molecular Function: ATP binding (GO:0005524);; Cellular Component: membrane (GO:0016020);; Biological Process: signal transduction by protein phosphorylation (GO:0023014);;	K14509|0.0|pop:POPTR_830447|ETR1	Ethylene response sensor 1 GN=T20B5.14 OS=Arabidopsis thaliana (Mouse-ear cress) PE=1 SV=1	Ethylene receptor GN=MdERS2 OS=Malus domestica (Apple) PE=2 SV=1	ethylene receptor [Malus domestica]	Malus x domestica MdERS2 mRNA for ethylene receptor, complete cds
CS2_vs_CS1	gene.MD03G1294400	9.83764e-05	-1.08118	down	--	--	--	--	--	Uncharacterized protein GN=PRUPE_ppa004056mg OS=Prunus persica (Peach) PE=4 SV=1	PREDICTED: protein trichome birefringence-like 6 [Malus domestica]	PREDICTED: Malus x domestica protein trichome birefringence-like 6 (LOC103432625), mRNA
CS2_vs_CS1	gene.MD04G1002800	0.000575428	1.03431	up	--	--	--	--	--	Predicted protein GN=POPTRDRAFT_844222 OS=Populus trichocarpa (Western balsam poplar) PE=4 SV=1	PREDICTED: ankyrin repeat domain-containing protein 13C [Cucumis melo]	PREDICTED: Malus x domestica uncharacterized LOC103443515 (LOC103443515), mRNA
CS2_vs_CS1	gene.MD04G1003300	1.76613e-34	-2.43319	down	[Q]	Secondary metabolites biosynthesis, transport and catabolism	Biological Process: biosynthetic process (GO:0009058);; Molecular Function: naringenin-chalcone synthase activity (GO:0016210);;	K00660|0.0|pop:POPTR_554829|CHS6	Chalcone synthase 2 GN=CHS2 OS=Camellia sinensis (Tea) PE=2 SV=1	Chalcone synthase GN=CHS OS=Sorbus aucuparia (European mountain ash) PE=2 SV=1	chalcone synthase [Sorbus aucuparia]	Malus domestica polyketide synthase 5 (LOC103443513), mRNA>gi|213950513|gb|EU872155.1| Malus x domestica clone mchs23 chalcone synthase mRNA, complete cds
CS2_vs_CS1	gene.MD04G1003400	2.64746e-73	-2.87137	down	--	--	Biological Process: biosynthetic process (GO:0009058);; Molecular Function: naringenin-chalcone synthase activity (GO:0016210);;	--	Chalcone synthase 2 GN=CHS2 OS=Camellia sinensis (Tea) PE=2 SV=1	CHS2 chalcone synthase OS=Malus domestica (Apple) PE=2 SV=1	PREDICTED: polyketide synthase 5-like [Malus domestica]	PREDICTED: Malus x domestica polyketide synthase 5-like (LOC103443512), mRNA
CS2_vs_CS1	gene.MD04G1005000	0.000577445	-1.89628	down	--	--	--	--	--	Uncharacterized protein GN=PRUPE_ppa026896mg OS=Prunus persica (Peach) PE=4 SV=1	PREDICTED: uncharacterized protein LOC103443498 isoform X4 [Malus domestica]	PREDICTED: Malus x domestica uncharacterized LOC103411584 (LOC103411584), transcript variant X4, mRNA
CS2_vs_CS1	gene.MD04G1009100	6.15252e-57	-1.04456	down	--	--	--	--	--	--	--	PREDICTED: Malus x domestica small EDRK-rich factor 2 (LOC103443478), mRNA
CS2_vs_CS1	gene.MD04G1016000	2.46294e-06	1.72181	up	--	--	Molecular Function: glucose-6-phosphate dehydrogenase activity (GO:0004345);; Biological Process: pentose-phosphate shunt (GO:0006098);; Molecular Function: NADP binding (GO:0050661);;	K00036|0.0|vvi:100267681|hypothetical protein LOC100267681	Glucose-6-phosphate 1-dehydrogenase 2, chloroplastic (Precursor) GN=At5g13110 OS=Arabidopsis thaliana (Mouse-ear cress) PE=2 SV=2	Uncharacterized protein GN=PRUPE_ppa015545mg OS=Prunus persica (Peach) PE=4 SV=1	PREDICTED: glucose-6-phosphate 1-dehydrogenase 2, chloroplastic, partial [Malus domestica]	PREDICTED: Malus x domestica glucose-6-phosphate 1-dehydrogenase 2, chloroplastic (LOC103443546), partial mRNA
CS2_vs_CS1	gene.MD04G1017200	4.83005e-09	-1.70542	down	[H]	Coenzyme transport and metabolism	Molecular Function: adenosylhomocysteinase activity (GO:0004013);; Biological Process: one-carbon metabolic process (GO:0006730);;	K01251|0.0|rcu:RCOM_0523500|adenosylhomocysteinase, putative (EC:3.3.1.1)	Adenosylhomocysteinase GN=SAHH OS=Medicago sativa (Alfalfa) PE=2 SV=1	Uncharacterized protein GN=PRUPE_ppa004934mg OS=Prunus persica (Peach) PE=4 SV=1	PREDICTED: adenosylhomocysteinase [Malus domestica]	PREDICTED: Malus x domestica adenosylhomocysteinase (LOC103443415), mRNA
CS2_vs_CS1	gene.MD04G1018000	2.01129e-26	-1.5889	down	--	--	--	--	--	Uncharacterized protein GN=PRUPE_ppa009767mg OS=Prunus persica (Peach) PE=4 SV=1	PREDICTED: histidine protein methyltransferase 1 homolog [Malus domestica]	PREDICTED: Malus x domestica histidine protein methyltransferase 1 homolog (LOC103421787), mRNA
CS2_vs_CS1	gene.MD04G1019100	1.66451e-30	1.35896	up	[RTKL]	--	Molecular Function: protein serine/threonine kinase activity (GO:0004674);; Molecular Function: ATP binding (GO:0005524);; Biological Process: protein phosphorylation (GO:0006468);; Cellular Component: integral component of membrane (GO:0016021);;	--	Probable receptor protein kinase TMK1 (Precursor) GN=TMK1 OS=Arabidopsis thaliana (Mouse-ear cress) PE=1 SV=1	Uncharacterized protein GN=PRUPE_ppa001041mg OS=Prunus persica (Peach) PE=4 SV=1	PREDICTED: receptor-like kinase TMK4 [Malus domestica]	PREDICTED: Malus x domestica receptor-like kinase TMK4 (LOC103443399), mRNA
CS2_vs_CS1	gene.MD04G1019900	0.00248321	-1.47622	down	--	--	Biological Process: cellular process (GO:0009987);;	--	--	Uncharacterized protein GN=PRUPE_ppa004212mg OS=Prunus persica (Peach) PE=4 SV=1	PREDICTED: uncharacterized protein LOC103411565 isoform X1 [Malus domestica]	PREDICTED: Malus x domestica uncharacterized LOC103411565 (LOC103411565), transcript variant X1, mRNA
CS2_vs_CS1	gene.MD04G1020100	3.62368e-78	-2.95962	down	--	--	Molecular Function: hydrolase activity, hydrolyzing O-glycosyl compounds (GO:0004553);; Cellular Component: cell wall (GO:0005618);; Biological Process: cellular glucan metabolic process (GO:0006073);; Molecular Function: xyloglucan:xyloglucosyl transferase activity (GO:0016762);; Cellular Component: apoplast (GO:0048046);;	K08235|9e-164|pop:POPTR_572886|hypothetical protein	Brassinosteroid-regulated protein BRU1 (Precursor) OS=Glycine max (Soybean) PE=2 SV=1	Uncharacterized protein GN=PRUPE_ppa009792mg OS=Prunus persica (Peach) PE=4 SV=1	PREDICTED: xyloglucan endotransglucosylase/hydrolase 2 [Malus domestica]	PREDICTED: Malus x domestica xyloglucan endotransglucosylase/hydrolase 2 (LOC103443395), mRNA
CS2_vs_CS1	gene.MD04G1021200	6.48689e-08	1.83215	up	--	--	--	--	--	Uncharacterized protein GN=PRUPE_ppa001314mg OS=Prunus persica (Peach) PE=4 SV=1	PREDICTED: uncharacterized protein LOC103962612 [Pyrus x bretschneideri]	PREDICTED: Pyrus x bretschneideri uncharacterized LOC103962612 (LOC103962612), mRNA
CS2_vs_CS1	gene.MD04G1021400	2.50935e-05	1.76122	up	--	--	Molecular Function: nucleic acid binding (GO:0003676);; Molecular Function: zinc ion binding (GO:0008270);; Biological Process: DNA integration (GO:0015074);;	--	Endonuclease OS=Nicotiana tabacum (Common tobacco) PE=2 SV=1	Putative uncharacterized protein GN=VITISV_033389 OS=Vitis vinifera (Grape) PE=4 SV=1	PREDICTED: uncharacterized mitochondrial protein AtMg00810-like [Malus domestica]	Arabidopsis halleri isolate S10 clone Ah10_1 S-locus region genomic sequence
CS2_vs_CS1	gene.MD04G1022400	1.90297e-07	-1.70414	down	[O]	Posttranslational modification, protein turnover, chaperones	Biological Process: protein folding (GO:0006457);;	K09571|0.0|pop:POPTR_824273|hypothetical protein	Peptidyl-prolyl cis-trans isomerase FKBP65 GN=K15N18.12 OS=Arabidopsis thaliana (Mouse-ear cress) PE=1 SV=1	Uncharacterized protein GN=PRUPE_ppa003399mg OS=Prunus persica (Peach) PE=4 SV=1	PREDICTED: 70 kDa peptidyl-prolyl isomerase-like [Malus domestica]	PREDICTED: Malus x domestica 70 kDa peptidyl-prolyl isomerase-like (LOC103415797), mRNA
CS2_vs_CS1	gene.MD04G1024800	8.54343e-46	-3.37894	down	--	--	--	--	--	Predicted protein GN=POPTRDRAFT_1099619 OS=Populus trichocarpa (Western balsam poplar) PE=4 SV=1	PREDICTED: dCTP pyrophosphatase 1-like [Malus domestica]	PREDICTED: Malus x domestica dCTP pyrophosphatase 1-like (LOC103415799), mRNA
CS2_vs_CS1	gene.MD04G1028400	4.53868e-07	1.98001	up	--	--	--	--	--	--	--	PREDICTED: Pyrus x bretschneideri uncharacterized LOC103960409 (LOC103960409), ncRNA
CS2_vs_CS1	gene.MD04G1028500	1.49458e-14	1.01911	up	[R]	General function prediction only	Cellular Component: nucleus (GO:0005634);; Molecular Function: zinc ion binding (GO:0008270);; Molecular Function: histone-lysine N-methyltransferase activity (GO:0018024);; Biological Process: histone lysine methylation (GO:0034968);;	--	Histone-lysine N-methyltransferase ATX2 GN=T20M3.10 OS=Arabidopsis thaliana (Mouse-ear cress) PE=2 SV=1	Uncharacterized protein GN=PRUPE_ppa000574mg OS=Prunus persica (Peach) PE=4 SV=1	PREDICTED: histone-lysine N-methyltransferase ATX2 isoform X1 [Malus domestica]	PREDICTED: Malus x domestica histone-lysine N-methyltransferase ATX2 (LOC103400651), transcript variant X6, mRNA
CS2_vs_CS1	gene.MD04G1031000	1.38102e-28	1.40926	up	[G]	Carbohydrate transport and metabolism	--	--	Carboxyvinyl-carboxyphosphonate phosphorylmutase, chloroplastic (Precursor) GN=At1g77060 OS=Arabidopsis thaliana (Mouse-ear cress) PE=1 SV=2	Uncharacterized protein GN=PRUPE_ppa004779mg OS=Prunus persica (Peach) PE=4 SV=1	PREDICTED: petal death protein isoform X1 [Pyrus x bretschneideri]	PREDICTED: Malus x domestica 2,3-dimethylmalate lyase (LOC103453629), partial mRNA
CS2_vs_CS1	gene.MD04G1031800	0.00873636	1.00364	up	--	--	--	--	--	--	--	PREDICTED: Malus x domestica uncharacterized LOC103450305 (LOC103450305), transcript variant X4, ncRNA
CS2_vs_CS1	gene.MD04G1033000	2.22384e-41	2.30058	up	--	--	--	--	Transcription factor bHLH128 GN=T20M3.7 OS=Arabidopsis thaliana (Mouse-ear cress) PE=1 SV=1	Uncharacterized protein (Fragment) GN=PRUPE_ppa025178mg OS=Prunus persica (Peach) PE=4 SV=1	PREDICTED: transcription factor bHLH128 [Malus domestica]	PREDICTED: Malus x domestica transcription factor bHLH128 (LOC103443594), mRNA
CS2_vs_CS1	gene.MD04G1033200	1.41105e-78	-1.17809	down	[R]	General function prediction only	Molecular Function: GTP binding (GO:0005525);; Biological Process: small GTPase mediated signal transduction (GO:0007264);; Biological Process: protein transport (GO:0015031);;	--	Ras-related protein RABA5e (Precursor) GN=T20M3.8 OS=Arabidopsis thaliana (Mouse-ear cress) PE=2 SV=1	Uncharacterized protein GN=PRUPE_ppa011186mg OS=Prunus persica (Peach) PE=4 SV=1	PREDICTED: ras-related protein RABA5e [Malus domestica]	PREDICTED: Malus x domestica ras-related protein RABA5e (LOC103443592), mRNA
CS2_vs_CS1	gene.MD04G1037100	5.75748e-08	-1.55082	down	--	--	--	--	--	Uncharacterized protein GN=PRUPE_ppa012819mg OS=Prunus persica (Peach) PE=4 SV=1	PREDICTED: protein FAM136A-like [Malus domestica]	PREDICTED: Malus x domestica protein FAM136A-like (LOC103435430), mRNA
CS2_vs_CS1	gene.MD04G1038300	3.83316e-10	-1.09969	down	--	--	Biological Process: mRNA splicing, via spliceosome (GO:0000398);;	K13130|3e-98|vvi:100260062|hypothetical protein LOC100260062	--	Uncharacterized protein OS=Glycine max (Soybean) PE=4 SV=1	PREDICTED: uncharacterized protein LOC103435448 [Malus domestica]	PREDICTED: Malus x domestica uncharacterized LOC103435448 (LOC103435448), mRNA
CS2_vs_CS1	gene.MD04G1040900	0.000322008	-1.03909	down	--	--	--	--	--	Predicted protein GN=POPTRDRAFT_562237 OS=Populus trichocarpa (Western balsam poplar) PE=4 SV=1	PREDICTED: uncharacterized protein LOC103432724 isoform X1 [Malus domestica]	PREDICTED: Malus x domestica uncharacterized LOC103432724 (LOC103432724), transcript variant X3, mRNA
CS2_vs_CS1	gene.MD04G1042700	6.77477e-15	-1.02223	down	--	--	Cellular Component: intracellular (GO:0005622);; Molecular Function: zinc ion binding (GO:0008270);;	--	Salt tolerance protein GN=STO OS=Arabidopsis thaliana (Mouse-ear cress) PE=1 SV=1	COL domain class transcription factor GN=COL4 OS=Malus domestica (Apple) PE=2 SV=1	COL domain class transcription factor [Malus domestica]	Malus x domestica COL domain class transcription factor (COL4) mRNA, complete cds
CS2_vs_CS1	gene.MD04G1048000	2.85492e-232	3.80274	up	--	--	Molecular Function: chitinase activity (GO:0004568);; Biological Process: carbohydrate metabolic process (GO:0005975);; Biological Process: chitin catabolic process (GO:0006032);; Molecular Function: chitin binding (GO:0008061);; Biological Process: cell wall macromolecule catabolic process (GO:0016998);;	K01183|2e-155|pop:POPTR_1116414|hypothetical protein	Endochitinase PR4 (Precursor) GN=CHI4 OS=Phaseolus vulgaris (Kidney bean) PE=2 SV=1	Class IV chitinase OS=Pyrus pyrifolia (Chinese pear) PE=2 SV=1	PREDICTED: endochitinase EP3-like [Malus domestica]	PREDICTED: Malus x domestica endochitinase EP3-like (LOC103432770), mRNA
CS2_vs_CS1	gene.MD04G1052600	2.06563e-135	2.8456	up	--	--	Biological Process: cellular component organization (GO:0016043);; Biological Process: single-organism cellular process (GO:0044763);;	--	Expansin-like B1 (Precursor) GN=dl4545c OS=Arabidopsis thaliana (Mouse-ear cress) PE=2 SV=2	Uncharacterized protein GN=PRUPE_ppa010376mg OS=Prunus persica (Peach) PE=4 SV=1	PREDICTED: expansin-like B1 [Malus domestica]	PREDICTED: Malus x domestica expansin-like B1 (LOC103403698), mRNA
CS2_vs_CS1	gene.MD04G1057500	2.2312e-78	1.08446	up	--	--	Molecular Function: obsolete ubiquitin thiolesterase activity (GO:0004221);; Cellular Component: cytosol (GO:0005829);; Biological Process: ubiquitin-dependent protein catabolic process (GO:0006511);;	K05609|1e-141|rcu:RCOM_0191600|Ubiquitin carboxyl-terminal hydrolase isozyme L3, putative (EC:3.4.19.12)	--	Uncharacterized protein GN=PRUPE_ppa010780mg OS=Prunus persica (Peach) PE=4 SV=1	PREDICTED: ubiquitin carboxyl-terminal hydrolase isozyme L3-like [Pyrus x bretschneideri]	PREDICTED: Malus x domestica ubiquitin carboxyl-terminal hydrolase 3-like (LOC103431461), mRNA
CS2_vs_CS1	gene.MD04G1057600	5.27911e-93	2.9358	up	--	--	--	--	Oleosin 18.5 kDa GN=At4g25140 OS=Arabidopsis thaliana (Mouse-ear cress) PE=1 SV=1	Oleosin GN=Solyc06g060840.1 OS=Solanum lycopersicum (Tomato) PE=3 SV=1	PREDICTED: oleosin 18.5 kDa-like [Malus domestica]	PREDICTED: Malus x domestica oleosin 18.5 kDa-like (LOC103431460), mRNA
CS2_vs_CS1	gene.MD04G1058000	0.00104616	1.08216	up	--	--	Molecular Function: DNA binding (GO:0003677);; Molecular Function: transcription factor activity, sequence-specific DNA binding (GO:0003700);; Cellular Component: nucleus (GO:0005634);; Biological Process: regulation of transcription, DNA-templated (GO:0006355);;	--	Ethylene-responsive transcription factor 1A OS=Arabidopsis thaliana (Mouse-ear cress) PE=1 SV=2	AP2 domain class transcription factor GN=AP2D27 OS=Malus domestica (Apple) PE=2 SV=1	PREDICTED: ethylene-responsive transcription factor 2-like [Malus domestica]	PREDICTED: Malus x domestica ethylene-responsive transcription factor 2-like (LOC103415729), mRNA
CS2_vs_CS1	gene.MD04G1060700	1.27433e-06	-1.66662	down	[R]	General function prediction only	Molecular Function: iron ion binding (GO:0005506);; Cellular Component: peroxisome (GO:0005777);; Molecular Function: flavonol synthase activity (GO:0045431);; Molecular Function: iron-sulfur cluster binding (GO:0051536);; Biological Process: flavonol biosynthetic process (GO:0051555);; Biological Process: oxidation-reduction process (GO:0055114);;	--	1-aminocyclopropane-1-carboxylate oxidase homolog 2 GN=At1g06640 OS=Arabidopsis thaliana (Mouse-ear cress) PE=2 SV=1	Uncharacterized protein GN=PRUPE_ppa009079mg OS=Prunus persica (Peach) PE=4 SV=1	PREDICTED: 1-aminocyclopropane-1-carboxylate oxidase-like isoform X1 [Malus domestica]	PREDICTED: Malus x domestica 1-aminocyclopropane-1-carboxylate oxidase-like (LOC103432993), transcript variant X1, mRNA
CS2_vs_CS1	gene.MD04G1064600	0	-2.15807	down	[M]	Cell wall/membrane/envelope biogenesis	Molecular Function: UDP-glucose 4-epimerase activity (GO:0003978);; Biological Process: galactose metabolic process (GO:0006012);; Biological Process: cellular metabolic process (GO:0044237);; Molecular Function: coenzyme binding (GO:0050662);;	K01784|0.0|pop:POPTR_817341|UDP-glucose 4-epimerase (EC:5.1.3.2)	Bifunctional UDP-glucose 4-epimerase and UDP-xylose 4-epimerase 1 GN=UGE1 OS=Arabidopsis thaliana (Mouse-ear cress) PE=1 SV=2	UDP-galactose GN=UGE OS=Malus domestica (Apple) PE=2 SV=1	PREDICTED: bifunctional UDP-glucose 4-epimerase and UDP-xylose 4-epimerase 1 [Pyrus x bretschneideri]	Malus domestica bifunctional UDP-glucose 4-epimerase and UDP-xylose 4-epimerase 1 (UGE), mRNA>gi|139001603|dbj|AB272752.1| Malus x domestica UGE mRNA for UDP-galactose, complete cds
CS2_vs_CS1	gene.MD04G1064800	5.00788e-14	-1.39672	down	--	--	--	--	BON1-associated protein 2 GN=F4I18.26 OS=Arabidopsis thaliana (Mouse-ear cress) PE=1 SV=1	Uncharacterized protein GN=PRUPE_ppa010653mg OS=Prunus persica (Peach) PE=4 SV=1	PREDICTED: BON1-associated protein 2-like [Malus domestica]	PREDICTED: Malus x domestica BON1-associated protein 2-like (LOC103419267), mRNA
CS2_vs_CS1	gene.MD04G1065500	2.70142e-42	1.06466	up	[R]	General function prediction only	Molecular Function: serine-type endopeptidase activity (GO:0004252);; Cellular Component: Golgi apparatus (GO:0005794);; Biological Process: proteolysis (GO:0006508);; Cellular Component: integral component of membrane (GO:0016021);;	--	--	Uncharacterized protein GN=PRUPE_ppa008715mg OS=Prunus persica (Peach) PE=4 SV=1	PREDICTED: RHOMBOID-like protein 2 [Malus domestica]	PREDICTED: Malus x domestica RHOMBOID-like protein 2 (LOC103433020), mRNA
CS2_vs_CS1	gene.MD04G1065600	0.000102872	-1.53577	down	--	--	--	--	--	Uncharacterized protein GN=PRUPE_ppa005786mg OS=Prunus persica (Peach) PE=4 SV=1	hypothetical protein PRUPE_ppa005786mg [Prunus persica]	Prunus persica hypothetical protein (PRUPE_ppa005786mg) mRNA, complete cds
CS2_vs_CS1	gene.MD04G1066900	1.47414e-41	1.17313	up	--	--	--	--	F-box protein PP2-A12 GN=P2A12 OS=Arabidopsis thaliana (Mouse-ear cress) PE=2 SV=1	Uncharacterized protein GN=PRUPE_ppa009544mg OS=Prunus persica (Peach) PE=4 SV=1	PREDICTED: F-box protein PP2-A12-like [Pyrus x bretschneideri]	PREDICTED: Malus x domestica F-box protein PP2-A12-like (LOC103428129), transcript variant X1, mRNA
CS2_vs_CS1	gene.MD04G1068800	0.0014955	1.17039	up	[K]	Transcription	--	--	DNA-directed RNA polymerase D subunit 1 GN=At1g63020 OS=Arabidopsis thaliana (Mouse-ear cress) PE=1 SV=1	Uncharacterized protein GN=PRUPE_ppa000278mg OS=Prunus persica (Peach) PE=4 SV=1	PREDICTED: DNA-directed RNA polymerase IV subunit 1 [Pyrus x bretschneideri]	PREDICTED: Pyrus x bretschneideri DNA-directed RNA polymerase IV subunit 1 (LOC103966471), transcript variant X2, mRNA
CS2_vs_CS1	gene.MD04G1070300	6.69055e-281	-2.90563	down	--	--	--	--	--	Stay green 1 GN=SGR1 OS=Pyrus x bretschneideri PE=2 SV=1	PREDICTED: protein STAY-GREEN, chloroplastic-like [Malus domestica]	PREDICTED: Malus x domestica protein STAY-GREEN, chloroplastic-like (LOC103444765), mRNA
CS2_vs_CS1	gene.MD04G1071000	5.45894e-10	-1.75254	down	--	--	--	--	PGR5-like protein 1A, chloroplastic (Precursor) GN=PGRL1A OS=Arabidopsis thaliana (Mouse-ear cress) PE=1 SV=1	Uncharacterized protein GN=PRUPE_ppa008744mg OS=Prunus persica (Peach) PE=4 SV=1	PREDICTED: PGR5-like protein 1A, chloroplastic [Malus domestica]	PREDICTED: Malus x domestica PGR5-like protein 1A, chloroplastic (LOC103444768), mRNA
CS2_vs_CS1	gene.MD04G1075500	4.42206e-17	-3.12303	down	--	--	Cellular Component: integral component of membrane (GO:0016021);;	--	Probable sugar phosphate/phosphate translocator At1g12500 GN=At1g12500 OS=Arabidopsis thaliana (Mouse-ear cress) PE=2 SV=1	Uncharacterized protein GN=PRUPE_ppa007625mg OS=Prunus persica (Peach) PE=4 SV=1	PREDICTED: probable sugar phosphate/phosphate translocator At1g12500 [Malus domestica]	PREDICTED: Malus x domestica probable sugar phosphate/phosphate translocator At1g12500 (LOC103405361), mRNA
CS2_vs_CS1	gene.MD04G1078900	1.8516e-07	-1.06992	down	[L]	Replication, recombination and repair	Biological Process: photoreactive repair (GO:0000719);; Molecular Function: deoxyribodipyrimidine photo-lyase activity (GO:0003904);; Biological Process: UV protection (GO:0009650);;	K01669|0.0|vvi:100243038|hypothetical protein LOC100243038	Deoxyribodipyrimidine photo-lyase GN=F5O11.9 OS=Arabidopsis thaliana (Mouse-ear cress) PE=2 SV=1	Uncharacterized protein GN=PRUPE_ppa004792mg OS=Prunus persica (Peach) PE=4 SV=1	PREDICTED: deoxyribodipyrimidine photo-lyase [Malus domestica]	PREDICTED: Malus x domestica deoxyribodipyrimidine photo-lyase (LOC103433070), mRNA
CS2_vs_CS1	gene.MD04G1079100	2.70116e-10	-2.20944	down	--	--	--	--	--	Uncharacterized protein GN=PRUPE_ppa016077mg OS=Prunus persica (Peach) PE=4 SV=1	PREDICTED: IRK-interacting protein-like [Malus domestica]	PREDICTED: Malus x domestica IRK-interacting protein-like (LOC103408298), mRNA
CS2_vs_CS1	gene.MD04G1080200	2.09202e-05	2.50595	up	[Q]	Secondary metabolites biosynthesis, transport and catabolism	--	--	Cytochrome P450 76C1 GN=CYP76C1 OS=Arabidopsis thaliana (Mouse-ear cress) PE=2 SV=1	Uncharacterized protein GN=PRUPE_ppa008535mg OS=Prunus persica (Peach) PE=4 SV=1	PREDICTED: flavonoid 3&apos;,5&apos;-hydroxylase 1-like [Pyrus x bretschneideri]	PREDICTED: Pyrus x bretschneideri flavonoid 3',5'-hydroxylase 1-like (LOC103952304), mRNA
CS2_vs_CS1	gene.MD04G1083800	2.05341e-12	3.16761	up	--	--	--	--	Axial regulator YABBY 1 GN=F4L23.30 OS=Arabidopsis thaliana (Mouse-ear cress) PE=1 SV=1	Uncharacterized protein GN=PRUPE_ppa011209mg OS=Prunus persica (Peach) PE=4 SV=1	PREDICTED: axial regulator YABBY 1-like isoform X1 [Malus domestica]	PREDICTED: Malus x domestica axial regulator YABBY 1-like (LOC103444033), transcript variant X1, mRNA
CS2_vs_CS1	gene.MD04G1083900	1.04999e-22	-2.20292	down	[Q]	Secondary metabolites biosynthesis, transport and catabolism	Biological Process: polysaccharide biosynthetic process (GO:0000271);; Molecular Function: copper ion binding (GO:0005507);; Cellular Component: vacuolar membrane (GO:0005774);; Molecular Function: L-ascorbate oxidase activity (GO:0008447);; Cellular Component: plant-type cell wall (GO:0009505);; Cellular Component: plasmodesma (GO:0009506);; Biological Process: multidimensional cell growth (GO:0…	--	Monocopper oxidase-like protein SKU5 (Precursor) GN=SKU5 OS=Arabidopsis thaliana (Mouse-ear cress) PE=1 SV=1	Uncharacterized protein GN=PRUPE_ppa003224mg OS=Prunus persica (Peach) PE=4 SV=1	PREDICTED: monocopper oxidase-like protein SKU5 [Malus domestica]	PREDICTED: Malus x domestica monocopper oxidase-like protein SKU5 (LOC103444031), mRNA
CS2_vs_CS1	gene.MD04G1087300	7.2783e-52	1.36612	up	--	--	Biological Process: polysaccharide biosynthetic process (GO:0000271);; Biological Process: lipid transport (GO:0006869);; Biological Process: pattern specification process (GO:0007389);; Molecular Function: lipid binding (GO:0008289);; Biological Process: regulation of cell size (GO:0008361);; Biological Process: multidimensional cell growth (GO:0009825);; Biological Process: auxin polar transpor…	--	14 kDa proline-rich protein DC2.15 (Precursor) OS=Daucus carota (Carrot) PE=2 SV=1	Uncharacterized protein GN=PRUPE_ppa013010mg OS=Prunus persica (Peach) PE=4 SV=1	PREDICTED: 14 kDa proline-rich protein DC2.15-like [Malus domestica]	PREDICTED: Malus x domestica 14 kDa proline-rich protein DC2.15-like (LOC103401190), mRNA
CS2_vs_CS1	gene.MD04G1094100	7.05119e-06	1.01035	up	--	--	--	--	--	Uncharacterized protein GN=PRUPE_ppa007701mg OS=Prunus persica (Peach) PE=4 SV=1	PREDICTED: transcription initiation factor TFIID subunit 8-like [Malus domestica]	PREDICTED: Malus x domestica transcription initiation factor TFIID subunit 8-like (LOC103433211), mRNA
CS2_vs_CS1	gene.MD04G1096600	1.03061e-88	-1.05346	down	[R]	General function prediction only	Molecular Function: nucleotide binding (GO:0000166);; Molecular Function: poly(U) RNA binding (GO:0008266);; Biological Process: response to cold (GO:0009409);; Cellular Component: chloroplast thylakoid membrane (GO:0009535);; Cellular Component: chloroplast stroma (GO:0009570);; Biological Process: response to abscisic acid (GO:0009737);; Cellular Component: chloroplast envelope (GO:0009941);; C…	--	Ribonucleoprotein At2g37220, chloroplastic (Precursor) GN=At2g37220 OS=Arabidopsis thaliana (Mouse-ear cress) PE=1 SV=1	Uncharacterized protein GN=PRUPE_ppa009295mg OS=Prunus persica (Peach) PE=4 SV=1	PREDICTED: 29 kDa ribonucleoprotein A, chloroplastic [Malus domestica]	PREDICTED: Malus x domestica 29 kDa ribonucleoprotein A, chloroplastic (LOC103433228), transcript variant X4, mRNA
CS2_vs_CS1	gene.MD04G1100300	1.44769e-11	-2.04652	down	--	--	--	--	Zinc finger protein JACKDAW GN=F15A17.180 OS=Arabidopsis thaliana (Mouse-ear cress) PE=1 SV=1	Uncharacterized protein GN=PRUPE_ppa003849mg OS=Prunus persica (Peach) PE=4 SV=1	PREDICTED: zinc finger protein JACKDAW-like [Malus domestica]	PREDICTED: Malus x domestica zinc finger protein JACKDAW-like (LOC103433280), transcript variant X2, misc_RNA
CS2_vs_CS1	gene.MD04G1101700	0.000105328	1.38383	up	--	--	Molecular Function: peroxidase activity (GO:0004601);; Cellular Component: cytosol (GO:0005829);; Biological Process: response to oxidative stress (GO:0006979);; Molecular Function: heme binding (GO:0020037);; Molecular Function: metal ion binding (GO:0046872);; Biological Process: defense response to fungus (GO:0050832);; Biological Process: oxidation-reduction process (GO:0055114);;	--	Peroxidase 21 (Precursor) GN=T2N18.11 OS=Arabidopsis thaliana (Mouse-ear cress) PE=1 SV=1	Peroxidase GN=PO2 OS=Populus trichocarpa (Western balsam poplar) PE=2 SV=1	PREDICTED: peroxidase 21 [Malus domestica]	PREDICTED: Malus x domestica peroxidase 21 (LOC103433277), mRNA
CS2_vs_CS1	gene.MD04G1103000	0.00630831	-1.36787	down	[LKJ]	--	Molecular Function: nucleic acid binding (GO:0003676);; Molecular Function: ATP binding (GO:0005524);; Molecular Function: ATP-dependent helicase activity (GO:0008026);; Biological Process: pyrimidine ribonucleotide biosynthetic process (GO:0009220);;	--	DEAD-box ATP-dependent RNA helicase 57 GN=RH57 OS=Arabidopsis thaliana (Mouse-ear cress) PE=2 SV=1	Putative uncharacterized protein GN=VIT_08s0040g02300 OS=Vitis vinifera (Grape) PE=2 SV=1	PREDICTED: DEAD-box ATP-dependent RNA helicase 57-like [Malus domestica]	PREDICTED: Malus x domestica DEAD-box ATP-dependent RNA helicase 57-like (LOC103419292), mRNA
CS2_vs_CS1	gene.MD04G1104700	1.29198e-32	1.30583	up	[B]	Chromatin structure and dynamics	--	--	Nuclear transcription factor Y subunit B-10 GN=NFYB10 OS=Arabidopsis thaliana (Mouse-ear cress) PE=2 SV=1	Uncharacterized protein GN=PRUPE_ppa012382mg OS=Prunus persica (Peach) PE=4 SV=1	PREDICTED: nuclear transcription factor Y subunit B-1-like isoform X2 [Malus domestica]	PREDICTED: Malus x domestica nuclear transcription factor Y subunit B-like (LOC103433333), transcript variant X3, mRNA
CS2_vs_CS1	gene.MD04G1104800	2.52164e-61	-1.65707	down	[RTKL]	--	--	--	Probable LRR receptor-like serine/threonine-protein kinase At1g67720 (Precursor) GN=At1g67720 OS=Arabidopsis thaliana (Mouse-ear cress) PE=2 SV=1	Uncharacterized protein GN=PRUPE_ppa001056mg OS=Prunus persica (Peach) PE=4 SV=1	PREDICTED: probable LRR receptor-like serine/threonine-protein kinase At1g67720 isoform X1 [Malus domestica]	PREDICTED: Malus x domestica probable LRR receptor-like serine/threonine-protein kinase At1g67720 (LOC103433332), transcript variant X1, mRNA
CS2_vs_CS1	gene.MD04G1105200	1.08082e-10	1.4673	up	--	--	Biological Process: transcription, DNA-templated (GO:0006351);; Biological Process: system development (GO:0048731);;	--	Floral homeotic protein APETALA 2 GN=AP2 OS=Arabidopsis thaliana (Mouse-ear cress) PE=1 SV=1	Uncharacterized protein GN=PRUPE_ppa005230mg OS=Prunus persica (Peach) PE=4 SV=1	PREDICTED: floral homeotic protein APETALA 2-like isoform X1 [Malus domestica]	PREDICTED: Malus x domestica floral homeotic protein APETALA 2-like (LOC103433249), transcript variant X1, mRNA
CS2_vs_CS1	gene.MD04G1110500	0.00901488	-1.32326	down	[RTKL]	--	--	--	Probable LRR receptor-like serine/threonine-protein kinase At3g47570 (Precursor) GN=At3g47570 OS=Arabidopsis thaliana (Mouse-ear cress) PE=1 SV=1	Uncharacterized protein (Fragment) GN=PRUPE_ppa023423mg OS=Prunus persica (Peach) PE=4 SV=1	PREDICTED: probable LRR receptor-like serine/threonine-protein kinase At3g47570 isoform X1 [Malus domestica]	PREDICTED: Malus x domestica probable LRR receptor-like serine/threonine-protein kinase At3g47570 (LOC103408359), transcript variant X1, mRNA
CS2_vs_CS1	gene.MD04G1111400	0.00124015	1.48846	up	[O]	Posttranslational modification, protein turnover, chaperones	Molecular Function: transferase activity (GO:0016740);;	K00799|2e-111|rcu:RCOM_0819940|glutathione-s-transferase omega, putative	Glutathione S-transferase L3 GN=GSTL3 OS=Arabidopsis thaliana (Mouse-ear cress) PE=2 SV=1	Uncharacterized protein GN=PRUPE_ppa010816mg OS=Prunus persica (Peach) PE=4 SV=1	PREDICTED: glutathione S-transferase L3-like isoform X1 [Pyrus x bretschneideri]	PREDICTED: Malus x domestica glutathione S-transferase L3-like (LOC103419315), mRNA
CS2_vs_CS1	gene.MD04G1113200	6.8736e-67	2.20574	up	[T]	Signal transduction mechanisms	--	--	Two-component response regulator-like PRR37 GN=PRR37 OS=Oryza sativa subsp. indica (Rice) PE=2 SV=2	Uncharacterized protein OS=Glycine max (Soybean) PE=4 SV=1	PREDICTED: two-component response regulator-like APRR7 isoform X1 [Pyrus x bretschneideri]	PREDICTED: Pyrus x bretschneideri two-component response regulator-like APRR7 (LOC103926536), transcript variant X1, mRNA
CS2_vs_CS1	gene.MD04G1118800	1.0183e-15	-1.12504	down	--	--	--	--	--	Uncharacterized protein GN=PRUPE_ppa007747mg OS=Prunus persica (Peach) PE=4 SV=1	PREDICTED: protein SLOW GREEN 1, chloroplastic [Malus domestica]	PREDICTED: Malus x domestica protein SLOW GREEN 1, chloroplastic (LOC103433367), transcript variant X2, mRNA
CS2_vs_CS1	gene.MD04G1120400	6.21358e-10	-3.93457	down	--	--	Cellular Component: membrane (GO:0016020);;	--	WAT1-related protein At2g37460 GN=At2g37460 OS=Arabidopsis thaliana (Mouse-ear cress) PE=2 SV=1	Uncharacterized protein GN=PRUPE_ppa007333mg OS=Prunus persica (Peach) PE=4 SV=1	PREDICTED: WAT1-related protein At2g37460-like [Malus domestica]	PREDICTED: Malus x domestica WAT1-related protein At2g37460-like (LOC103433374), transcript variant X2, mRNA
CS2_vs_CS1	gene.MD04G1123300	1.29361e-15	2.66108	up	--	--	--	--	UNC93-like protein 3 GN=At3g09470 OS=Arabidopsis thaliana (Mouse-ear cress) PE=2 SV=1	Uncharacterized protein (Fragment) GN=PRUPE_ppa020298mg OS=Prunus persica (Peach) PE=4 SV=1	PREDICTED: UNC93-like protein 3 [Malus domestica]	PREDICTED: Malus x domestica UNC93-like protein 3 (LOC103433386), mRNA
CS2_vs_CS1	gene.MD04G1125600	4.35153e-184	1.6195	up	[O]	Posttranslational modification, protein turnover, chaperones	Molecular Function: ATP binding (GO:0005524);; Biological Process: response to stress (GO:0006950);; Molecular Function: 2-alkenal reductase [NAD(P)] activity (GO:0032440);; Biological Process: oxidation-reduction process (GO:0055114);;	--	Probable mediator of RNA polymerase II transcription subunit 37e GN=At5g02500 OS=Arabidopsis thaliana (Mouse-ear cress) PE=1 SV=3	Heat shock cognate 70 kDa protein, putative, expressed GN=LOC_Os11g47760 OS=Oryza sativa subsp. japonica (Rice) PE=3 SV=1	PREDICTED: probable mediator of RNA polymerase II transcription subunit 37c isoform X2 [Gossypium raimondii]	PREDICTED: Malus x domestica probable mediator of RNA polymerase II transcription subunit 37e (LOC103433399), mRNA
CS2_vs_CS1	gene.MD04G1128900	1.21173e-18	-1.19742	down	--	--	Molecular Function: metal ion binding (GO:0046872);;	--	Metallothionein-like protein type 2 GN=MT1 OS=Malus domestica (Apple) PE=3 SV=1	Metallothionein-like protein GN=Met1 OS=Malus xiaojinensis (Apple) PE=4 SV=1	PREDICTED: metallothionein-like protein type 2 [Malus domestica]	PREDICTED: Malus x domestica metallothionein-like protein type 2 (LOC103433417), mRNA
CS2_vs_CS1	gene.MD04G1129100	1.40091e-07	-1.78292	down	--	--	Biological Process: RNA methylation (GO:0001510);; Cellular Component: mitochondrial inner membrane (GO:0005743);; Biological Process: embryo development ending in seed dormancy (GO:0009793);; Biological Process: photorespiration (GO:0009853);; Molecular Function: P-P-bond-hydrolysis-driven protein transmembrane transporter activity (GO:0015450);; Cellular Component: mitochondrial intermembrane s…	--	Mitochondrial import inner membrane translocase subunit Tim9 GN=TIM9 OS=Oryza sativa subsp. japonica (Rice) PE=2 SV=2	Uncharacterized protein GN=PRUPE_ppa013952mg OS=Prunus persica (Peach) PE=4 SV=1	PREDICTED: mitochondrial import inner membrane translocase subunit Tim9-like [Pyrus x bretschneideri]	PREDICTED: Pyrus x bretschneideri mitochondrial import inner membrane translocase subunit Tim9-like (LOC103941806), mRNA
CS2_vs_CS1	gene.MD04G1130800	6.10917e-06	-1.23552	down	[R]	General function prediction only	Biological Process: metabolic process (GO:0008152);; Molecular Function: hydrolase activity (GO:0016787);;	K07025|6e-174|vvi:100232886|GRIP21	--	Uncharacterized protein GN=PRUPE_ppa008834mg OS=Prunus persica (Peach) PE=4 SV=1	PREDICTED: uncharacterized protein LOC103937203 [Pyrus x bretschneideri]	PREDICTED: Malus x domestica suppressor of disruption of TFIIS-like (LOC103433427), misc_RNA
CS2_vs_CS1	gene.MD04G1132800	7.55975e-30	1.28302	up	--	--	--	--	High-light-induced protein, chloroplastic (Precursor) GN=T7H20.170 OS=Arabidopsis thaliana (Mouse-ear cress) PE=1 SV=1	Uncharacterized protein GN=PRUPE_ppa013648mg OS=Prunus persica (Peach) PE=4 SV=1	PREDICTED: high-light-induced protein, chloroplastic-like [Malus domestica]	PREDICTED: Malus x domestica high-light-induced protein, chloroplastic-like (LOC103427586), mRNA
CS2_vs_CS1	gene.MD04G1136300	6.30055e-30	-1.4699	down	[F]	Nucleotide transport and metabolism	Molecular Function: uracil phosphoribosyltransferase activity (GO:0004845);; Biological Process: uracil salvage (GO:0006223);;	K00761|7e-153|vvi:100261300|hypothetical protein LOC100261300	Uracil phosphoribosyltransferase GN=UPP OS=Nicotiana tabacum (Common tobacco) PE=1 SV=1	Uncharacterized protein GN=PRUPE_ppa009527mg OS=Prunus persica (Peach) PE=4 SV=1	PREDICTED: uracil phosphoribosyltransferase-like [Pyrus x bretschneideri]	PREDICTED: Pyrus x bretschneideri uracil phosphoribosyltransferase-like (LOC103937225), mRNA
CS2_vs_CS1	gene.MD04G1138400	0	-4.89371	down	--	--	--	--	--	Uncharacterized protein GN=PRUPE_ppa003992mg OS=Prunus persica (Peach) PE=4 SV=1	PREDICTED: LOW QUALITY PROTEIN: aldehyde oxidase GLOX [Malus domestica]	PREDICTED: Malus x domestica aldehyde oxidase GLOX (LOC103423394), mRNA
CS2_vs_CS1	gene.MD04G1138500	2.12356e-08	1.83962	up	[E]	Amino acid transport and metabolism	Molecular Function: transporter activity (GO:0005215);; Biological Process: transport (GO:0006810);; Cellular Component: membrane (GO:0016020);;	--	Putative peptide/nitrate transporter At2g37900 GN=At2g37900 OS=Arabidopsis thaliana (Mouse-ear cress) PE=2 SV=1	Uncharacterized protein GN=PRUPE_ppa003260mg OS=Prunus persica (Peach) PE=4 SV=1	PREDICTED: protein NRT1/ PTR FAMILY 5.6 [Malus domestica]	PREDICTED: Malus x domestica protein NRT1/ PTR FAMILY 5.6 (LOC103423403), mRNA
CS2_vs_CS1	gene.MD04G1138900	1.5115e-13	-2.64377	down	--	--	--	--	--	Uncharacterized protein GN=PRUPE_ppa014227mg OS=Prunus persica (Peach) PE=4 SV=1	hypothetical protein PRUPE_ppa014227mg [Prunus persica]	PREDICTED: Pyrus x bretschneideri uncharacterized LOC103967335 (LOC103967335), ncRNA
CS2_vs_CS1	gene.MD04G1139800	2.79241e-74	-1.72123	down	[T]	Signal transduction mechanisms	Biological Process: response to stress (GO:0006950);;	--	Universal stress protein A-like protein GN=At3g01520 OS=Arabidopsis thaliana (Mouse-ear cress) PE=1 SV=2	Uncharacterized protein GN=PRUPE_ppa012560mg OS=Prunus persica (Peach) PE=4 SV=1	PREDICTED: universal stress protein PHOS32 [Malus domestica]	PREDICTED: Malus x domestica universal stress protein PHOS32 (LOC103433531), mRNA
CS2_vs_CS1	gene.MD04G1142700	3.13913e-07	2.17242	up	--	--	--	--	--	Putative uncharacterized protein GN=VITISV_003315 OS=Vitis vinifera (Grape) PE=4 SV=1	PREDICTED: uncharacterized protein LOC103413684 [Malus domestica]	PREDICTED: Malus x domestica uncharacterized LOC103413489 (LOC103413489), mRNA
CS2_vs_CS1	gene.MD04G1146400	1.19003e-115	1.16487	up	[I]	Lipid transport and metabolism	Molecular Function: acetyl-CoA carboxylase activity (GO:0003989);; Biological Process: fatty acid biosynthetic process (GO:0006633);; Cellular Component: acetyl-CoA carboxylase complex (GO:0009317);; Cellular Component: chloroplast stroma (GO:0009570);; Cellular Component: chloroplast envelope (GO:0009941);; Cellular Component: membrane (GO:0016020);; Molecular Function: transferase activity (GO:…	K01962|0.0|pop:POPTR_560869|acetyl-CoA carboxylase (EC:6.4.1.2)	Acetyl-coenzyme A carboxylase carboxyl transferase subunit alpha, chloroplastic (Precursor) GN=CAC3 OS=Arabidopsis thaliana (Mouse-ear cress) PE=1 SV=1	Uncharacterized protein GN=PRUPE_ppa001799mg OS=Prunus persica (Peach) PE=4 SV=1	PREDICTED: acetyl-coenzyme A carboxylase carboxyl transferase subunit alpha, chloroplastic [Pyrus x bretschneideri]	PREDICTED: Malus x domestica acetyl-coenzyme A carboxylase carboxyl transferase subunit alpha, chloroplastic-like (LOC103419374), mRNA
CS2_vs_CS1	gene.MD04G1147900	6.7384e-92	2.67002	up	--	--	Molecular Function: transferase activity, transferring acyl groups (GO:0016746);;	--	BAHD acyltransferase DCR GN=MRO11.2 OS=Arabidopsis thaliana (Mouse-ear cress) PE=2 SV=1	Uncharacterized protein GN=PRUPE_ppa005318mg OS=Prunus persica (Peach) PE=4 SV=1	PREDICTED: BAHD acyltransferase DCR-like, partial [Pyrus x bretschneideri]	PREDICTED: Malus x domestica BAHD acyltransferase DCR (LOC103433645), partial mRNA
CS2_vs_CS1	gene.MD04G1150500	1.92042e-26	1.17061	up	--	--	--	--	Phosphoglucan, water dikinase, chloroplastic (Precursor) OS=Arabidopsis thaliana (Mouse-ear cress) PE=1 SV=1	Uncharacterized protein GN=PRUPE_ppa007150mg OS=Prunus persica (Peach) PE=4 SV=1	PREDICTED: uncharacterized protein LOC103433588 [Malus domestica]	PREDICTED: Malus x domestica uncharacterized LOC103433588 (LOC103433588), mRNA
CS2_vs_CS1	gene.MD04G1151400	1.39642e-15	-1.33754	down	--	--	Molecular Function: zinc ion binding (GO:0008270);;	--	--	Uncharacterized protein GN=PRUPE_ppa010655mg OS=Prunus persica (Peach) PE=4 SV=1	PREDICTED: uncharacterized protein LOC103433596 [Malus domestica]	PREDICTED: Malus x domestica uncharacterized LOC103433596 (LOC103433596), mRNA
CS2_vs_CS1	gene.MD04G1152200	7.88866e-05	-1.60216	down	[E]	Amino acid transport and metabolism	Biological Process: lipid metabolic process (GO:0006629);; Molecular Function: hydrolase activity, acting on ester bonds (GO:0016788);;	--	GDSL esterase/lipase CPRD49 (Precursor) GN=CPRD49 OS=Arabidopsis thaliana (Mouse-ear cress) PE=2 SV=1	Uncharacterized protein GN=PRUPE_ppa010192mg OS=Prunus persica (Peach) PE=4 SV=1	PREDICTED: GDSL esterase/lipase CPRD49-like isoform X1 [Pyrus x bretschneideri]	PREDICTED: Pyrus x bretschneideri GDSL esterase/lipase CPRD49-like (LOC103966336), transcript variant X1, mRNA
CS2_vs_CS1	gene.MD04G1153300	1.36803e-09	-1.00063	down	[H]	Coenzyme transport and metabolism	Biological Process: maltose metabolic process (GO:0000023);; Molecular Function: catalytic activity (GO:0003824);; Cellular Component: cytosol (GO:0005829);; Cellular Component: plasma membrane (GO:0005886);; Biological Process: pentose-phosphate shunt (GO:0006098);; Biological Process: cellular amino acid metabolic process (GO:0006520);; Biological Process: response to lipid hydroperoxide (GO:00…	K06215|0.0|vvi:100260451|similar to Probable pyridoxal biosynthesis protein PDX1	Probable pyridoxal biosynthesis protein PDX1 GN=PDX1 OS=Hevea brasiliensis (Para rubber tree) PE=2 SV=1	Uncharacterized protein GN=PRUPE_ppa009029mg OS=Prunus persica (Peach) PE=4 SV=1	PREDICTED: pyridoxal 5&apos;-phosphate synthase subunit PDX1.3 [Malus domestica]	PREDICTED: Malus x domestica pyridoxal 5'-phosphate synthase subunit PDX1.3 (LOC103433606), mRNA
CS2_vs_CS1	gene.MD04G1153900	2.13831e-98	1.80333	up	--	--	--	--	--	Uncharacterized protein GN=PRUPE_ppa010691mg OS=Prunus persica (Peach) PE=4 SV=1	PREDICTED: dnaJ homolog subfamily B member 4-like [Malus domestica]	PREDICTED: Malus x domestica dnaJ homolog subfamily B member 4-like (LOC103433609), mRNA
CS2_vs_CS1	gene.MD04G1159900	3.01709e-54	1.60827	up	[GHR]	--	Molecular Function: magnesium ion binding (GO:0000287);; Biological Process: response to hypoxia (GO:0001666);; Molecular Function: pyruvate decarboxylase activity (GO:0004737);; Biological Process: metabolic process (GO:0008152);; Cellular Component: membrane (GO:0016020);; Molecular Function: thiamine pyrophosphate binding (GO:0030976);;	K01568|0.0|pop:POPTR_835585|pyruvate decarboxylase (EC:4.1.1.1)	Pyruvate decarboxylase 4 GN=PDC4 OS=Arabidopsis thaliana (Mouse-ear cress) PE=2 SV=1	Uncharacterized protein GN=PRUPE_ppa003086mg OS=Prunus persica (Peach) PE=4 SV=1	PREDICTED: pyruvate decarboxylase 2-like [Malus domestica]	PREDICTED: Malus x domestica pyruvate decarboxylase 2-like (LOC103425939), mRNA
CS2_vs_CS1	gene.MD04G1163300	7.5176e-24	Inf	up	--	--	--	--	Scarecrow-like protein 26 GN=SCL26 OS=Arabidopsis thaliana (Mouse-ear cress) PE=2 SV=1	Uncharacterized protein GN=PRUPE_ppa020043mg OS=Prunus persica (Peach) PE=4 SV=1	PREDICTED: scarecrow-like protein 26 [Malus domestica]	PREDICTED: Malus x domestica scarecrow-like protein 26 (LOC103434012), mRNA
CS2_vs_CS1	gene.MD04G1164600	1.14233e-66	-1.716	down	--	--	Cellular Component: integral component of membrane (GO:0016021);; Biological Process: transmembrane transport (GO:0055085);;	--	Nicotinamide adenine dinucleotide transporter 1, chloroplastic GN=T30B22.21 OS=Arabidopsis thaliana (Mouse-ear cress) PE=1 SV=2	Uncharacterized protein GN=PRUPE_ppa008598mg OS=Prunus persica (Peach) PE=4 SV=1	PREDICTED: mitoferrin-like [Malus domestica]	PREDICTED: Malus x domestica mitoferrin-like (LOC103433684), mRNA
CS2_vs_CS1	gene.MD04G1164700	1.22055e-57	1.24273	up	--	--	--	--	Uncharacterized protein At5g01610 GN=At5g01610 OS=Arabidopsis thaliana (Mouse-ear cress) PE=1 SV=1	Uncharacterized protein GN=PRUPE_ppa012415mg OS=Prunus persica (Peach) PE=4 SV=1	PREDICTED: uncharacterized protein At5g01610-like [Malus domestica]	PREDICTED: Malus x domestica uncharacterized protein At5g01610-like (LOC103433683), mRNA
CS2_vs_CS1	gene.MD04G1165100	5.03435e-16	-2.58186	down	--	--	--	--	--	Uncharacterized protein GN=PRUPE_ppa005833mg OS=Prunus persica (Peach) PE=4 SV=1	PREDICTED: protein trichome birefringence-like 35 [Malus domestica]	PREDICTED: Malus x domestica protein trichome birefringence-like 35 (LOC103433695), mRNA
CS2_vs_CS1	gene.MD04G1165800	3.05647e-42	1.75736	up	--	--	Biological Process: DNA metabolic process (GO:0006259);; Biological Process: chromosome segregation (GO:0007059);; Biological Process: meiosis I (GO:0007127);; Biological Process: chromosome organization (GO:0051276);;	--	Sister chromatid cohesion 1 protein 1 GN=MOP10.3 OS=Arabidopsis thaliana (Mouse-ear cress) PE=2 SV=2	Uncharacterized protein GN=PRUPE_ppa022203mg OS=Prunus persica (Peach) PE=4 SV=1	PREDICTED: LOW QUALITY PROTEIN: sister chromatid cohesion 1 protein 1 [Malus domestica]	PREDICTED: Malus x domestica sister chromatid cohesion 1 protein 1 (LOC103433703), mRNA
CS2_vs_CS1	gene.MD04G1166000	9.71382e-13	1.97463	up	--	--	--	--	--	--	--	PREDICTED: Malus x domestica uncharacterized LOC103433704 (LOC103433704), mRNA
CS2_vs_CS1	gene.MD04G1167000	4.04647e-14	-1.4165	down	--	--	Biological Process: transport (GO:0006810);; Cellular Component: integral component of membrane (GO:0016021);;	--	Patellin-6 GN=PATL6 OS=Arabidopsis thaliana (Mouse-ear cress) PE=2 SV=1	Uncharacterized protein GN=PRUPE_ppa006443mg OS=Prunus persica (Peach) PE=4 SV=1	PREDICTED: patellin-6-like [Malus domestica]	PREDICTED: Malus x domestica patellin-6-like (LOC103433712), mRNA
CS2_vs_CS1	gene.MD04G1167500	2.56686e-19	1.47792	up	--	--	Biological Process: membrane fusion (GO:0006944);; Molecular Function: methyltransferase activity (GO:0008168);; Biological Process: methylation (GO:0032259);; Biological Process: Golgi vesicle transport (GO:0048193);;	--	--	Uncharacterized protein GN=PRUPE_ppa004250mg OS=Prunus persica (Peach) PE=4 SV=1	PREDICTED: uncharacterized protein LOC103433716 [Malus domestica]	PREDICTED: Malus x domestica uncharacterized LOC103433716 (LOC103433716), mRNA
CS2_vs_CS1	gene.MD04G1167700	0.000784623	1.35414	up	--	--	Molecular Function: transcription factor activity, sequence-specific DNA binding (GO:0003700);; Biological Process: regulation of transcription, DNA-templated (GO:0006355);; Molecular Function: sequence-specific DNA binding (GO:0043565);;	K13424|5e-174|pop:POPTR_577093|hypothetical protein	Probable WRKY transcription factor 33 GN=WRKY33 OS=Arabidopsis thaliana (Mouse-ear cress) PE=1 SV=2	WRKY domain class transcription factor GN=WRKY9 OS=Malus domestica (Apple) PE=2 SV=1	probable WRKY transcription factor 33 [Malus domestica]	Malus domestica probable WRKY transcription factor 33 (WRKY9), mRNA>gi|302399142|gb|HM122727.1| Malus x domestica WRKY domain class transcription factor (WRKY9) mRNA, complete cds
CS2_vs_CS1	gene.MD04G1169900	7.93905e-34	-1.66847	down	--	--	--	--	--	Uncharacterized protein (Fragment) GN=PRUPE_ppa1027212mg OS=Prunus persica (Peach) PE=4 SV=1	PREDICTED: uncharacterized protein LOC103450723 [Malus domestica]	PREDICTED: Malus x domestica uncharacterized LOC103433733 (LOC103433733), mRNA
CS2_vs_CS1	gene.MD04G1170700	1.09869e-58	5.83682	up	--	--	--	--	--	Uncharacterized protein GN=PRUPE_ppa017010mg OS=Prunus persica (Peach) PE=4 SV=1	PREDICTED: uncharacterized protein LOC103408494 isoform X2 [Malus domestica]	PREDICTED: Malus x domestica transcription factor SCREAM2-like (LOC103408494), transcript variant X2, mRNA
CS2_vs_CS1	gene.MD04G1170900	1.01803e-82	-2.80698	down	--	--	Molecular Function: peroxidase activity (GO:0004601);; Biological Process: response to oxidative stress (GO:0006979);; Molecular Function: heme binding (GO:0020037);; Molecular Function: metal ion binding (GO:0046872);; Biological Process: oxidation-reduction process (GO:0055114);;	--	Cationic peroxidase 1 (Precursor) GN=PNC1 OS=Arachis hypogaea (Peanut) PE=1 SV=2	Uncharacterized protein GN=PRUPE_ppa008642mg OS=Prunus persica (Peach) PE=4 SV=1	PREDICTED: cationic peroxidase 1-like [Malus domestica]	PREDICTED: Malus x domestica cationic peroxidase 1-like (LOC103433738), mRNA
CS2_vs_CS1	gene.MD04G1172200	5.66285e-35	-3.57311	down	[RTKL]	--	Molecular Function: protein serine/threonine kinase activity (GO:0004674);; Molecular Function: ATP binding (GO:0005524);; Cellular Component: vacuole (GO:0005773);; Biological Process: protein phosphorylation (GO:0006468);; Cellular Component: plasmodesma (GO:0009506);; Biological Process: stomatal movement (GO:0010118);; Biological Process: calcium-mediated signaling (GO:0019722);;	--	CBL-interacting serine/threonine-protein kinase 14 GN=At5g01820 OS=Arabidopsis thaliana (Mouse-ear cress) PE=1 SV=1	Uncharacterized protein GN=PRUPE_ppa005902mg OS=Prunus persica (Peach) PE=4 SV=1	CBL-interacting serine/threonine-protein kinase 11 [Malus domestica]	PREDICTED: Malus x domestica CBL-interacting serine/threonine-protein kinase 14-like (LOC103408496), mRNA
CS2_vs_CS1	gene.MD04G1178800	1.86135e-191	-3.3167	down	[Q]	Secondary metabolites biosynthesis, transport and catabolism	Molecular Function: oxidoreductase activity (GO:0016491);; Molecular Function: metal ion binding (GO:0046872);;	--	Cytochrome P450 714A1 GN=F6A4.120 OS=Arabidopsis thaliana (Mouse-ear cress) PE=2 SV=1	Uncharacterized protein GN=PRUPE_ppa004266mg OS=Prunus persica (Peach) PE=4 SV=1	PREDICTED: cytochrome P450 714A1-like [Pyrus x bretschneideri]	PREDICTED: Pyrus x bretschneideri cytochrome P450 714A1-like (LOC103960174), mRNA
CS2_vs_CS1	gene.MD04G1179200	0.000286646	1.00274	up	--	--	--	--	Unknown protein 1 OS=Helianthus annuus (Common sunflower) PE=1 SV=1	Uncharacterized protein GN=PRUPE_ppa010575mg OS=Prunus persica (Peach) PE=4 SV=1	PREDICTED: uncharacterized protein LOC103419419 [Malus domestica]	PREDICTED: Malus x domestica uncharacterized LOC103419419 (LOC103419419), mRNA
CS2_vs_CS1	gene.MD04G1180100	5.50998e-58	-1.07262	down	[G]	Carbohydrate transport and metabolism	Molecular Function: phosphoglycerate mutase activity (GO:0004619);; Cellular Component: cytoplasm (GO:0005737);; Biological Process: glycolytic process (GO:0006096);; Biological Process: response to stress (GO:0006950);; Molecular Function: manganese ion binding (GO:0030145);;	K01834|0.0|vvi:100245007|putative 2,3-bisphosphoglycerate-independent phosphoglycerate mutase	2,3-bisphosphoglycerate-independent phosphoglycerate mutase GN=PGM1 OS=Mesembryanthemum crystallinum (Common ice plant) PE=1 SV=1	Apgm protein GN=apgm OS=Malus domestica (Apple) PE=2 SV=1	PREDICTED: 2,3-bisphosphoglycerate-independent phosphoglycerate mutase-like [Malus domestica]	Malus domestica mRNA for phosphoglyceromutase, complete cds
CS2_vs_CS1	gene.MD04G1180200	4.93244e-08	-1.84403	down	--	--	--	--	Protein LURP-one-related 8 GN=At2g38640 OS=Arabidopsis thaliana (Mouse-ear cress) PE=2 SV=1	Uncharacterized protein GN=PRUPE_ppa011092mg OS=Prunus persica (Peach) PE=4 SV=1	PREDICTED: protein LURP-one-related 8 [Malus domestica]	PREDICTED: Malus x domestica protein LURP-one-related 8 (LOC103433796), mRNA
CS2_vs_CS1	gene.MD04G1181800	1.45636e-66	-1.29275	down	[RTKL]	--	--	--	Probable leucine-rich repeat receptor-like protein kinase At5g49770 (Precursor) GN=At5g49770 OS=Arabidopsis thaliana (Mouse-ear cress) PE=2 SV=1	Uncharacterized protein GN=PRUPE_ppa000921mg OS=Prunus persica (Peach) PE=4 SV=1	PREDICTED: probable leucine-rich repeat receptor-like protein kinase At5g49770 [Pyrus x bretschneideri]	PREDICTED: Malus x domestica probable leucine-rich repeat receptor-like protein kinase At5g49770 (LOC103434049), partial mRNA
CS2_vs_CS1	gene.MD04G1184600	2.88949e-08	-2.86468	down	--	--	--	--	--	Pectin acetylesterase (Fragment) GN=PAE1 OS=Eucalyptus globulus subsp. globulus (Tasmanian blue gum) PE=2 SV=1	PREDICTED: pectin acetylesterase 10-like [Malus domestica]	PREDICTED: Malus x domestica pectin acetylesterase 10-like (LOC103427665), mRNA
CS2_vs_CS1	gene.MD04G1186600	0.000335149	-1.50213	down	--	--	--	K08245|0.0|pop:POPTR_834438|hypothetical protein	Aspartic proteinase (Precursor) GN=OJ1127_B08.13 OS=Oryza sativa subsp. japonica (Rice) PE=2 SV=2	Uncharacterized protein GN=PRUPE_ppa004505mg OS=Prunus persica (Peach) PE=4 SV=1	PREDICTED: aspartic proteinase-like [Malus domestica]	PREDICTED: Malus x domestica aspartic proteinase-like (LOC103433833), mRNA
CS2_vs_CS1	gene.MD04G1187200	0.00913461	1.10241	up	--	--	Molecular Function: catalytic activity (GO:0003824);;	--	Glucan endo-1,3-beta-glucosidase 1 (Precursor) OS=Arabidopsis thaliana (Mouse-ear cress) PE=1 SV=3	Uncharacterized protein GN=PRUPE_ppa002843mg OS=Prunus persica (Peach) PE=4 SV=1	PREDICTED: mucin-2-like isoform X2 [Malus domestica]	PREDICTED: Malus x domestica mucin-2-like (LOC103427671), transcript variant X1, mRNA
CS2_vs_CS1	gene.MD04G1189200	0.00020546	-1.5322	down	--	--	--	--	Probable cysteine proteinase At3g19400 (Precursor) GN=At3g19400 OS=Arabidopsis thaliana (Mouse-ear cress) PE=2 SV=1	Cysteine proteinase GN=cys1 OS=Gossypium hirsutum (Upland cotton) PE=2 SV=1	PREDICTED: zingipain-2-like [Pyrus x bretschneideri]	PREDICTED: Pyrus x bretschneideri zingipain-2-like (LOC103955881), mRNA
CS2_vs_CS1	gene.MD04G1191000	6.64809e-06	-2.19474	down	[MG]	--	--	--	Chloroplast stem-loop binding protein of 41 kDa b, chloroplastic (Precursor) GN=T31J12.6 OS=Arabidopsis thaliana (Mouse-ear cress) PE=1 SV=1	Uncharacterized protein GN=PRUPE_ppa007071mg OS=Prunus persica (Peach) PE=4 SV=1	PREDICTED: chloroplast stem-loop binding protein of 41 kDa b, chloroplastic [Malus domestica]	PREDICTED: Malus x domestica chloroplast stem-loop binding protein of 41 kDa b, chloroplastic (LOC103433852), mRNA
CS2_vs_CS1	gene.MD04G1191700	3.59664e-21	3.84534	up	--	--	--	--	--	Uncharacterized protein GN=PRUPE_ppa012574mg OS=Prunus persica (Peach) PE=4 SV=1	PREDICTED: uncharacterized protein LOC103408523 [Malus domestica]	PREDICTED: Malus x domestica uncharacterized LOC103408523 (LOC103408523), mRNA
CS2_vs_CS1	gene.MD04G1194100	1.01752e-63	-2.56901	down	--	--	Molecular Function: inorganic diphosphatase activity (GO:0004427);; Molecular Function: hydrogen-translocating pyrophosphatase activity (GO:0009678);; Biological Process: proton transport (GO:0015992);; Cellular Component: membrane (GO:0016020);; Molecular Function: 2-alkenal reductase [NAD(P)] activity (GO:0032440);; Biological Process: oxidation-reduction process (GO:0055114);;	K01507|0.0|rcu:RCOM_1434780|Pyrophosphate-energized vacuolar membrane proton pump, putative (EC:1.3.1.74)	Pyrophosphate-energized vacuolar membrane proton pump 1 GN=F7H2.3 OS=Arabidopsis thaliana (Mouse-ear cress) PE=1 SV=1	Uncharacterized protein GN=PRUPE_ppa001833mg OS=Prunus persica (Peach) PE=4 SV=1	PREDICTED: pyrophosphate-energized vacuolar membrane proton pump 1-like [Malus domestica]	PREDICTED: Malus x domestica pyrophosphate-energized vacuolar membrane proton pump 1-like (LOC103433876), mRNA
CS2_vs_CS1	gene.MD04G1197600	7.51292e-09	1.2881	up	--	--	Cellular Component: chloroplast stroma (GO:0009570);;	--	--	Uncharacterized protein (Fragment) GN=PRUPE_ppa023746mg OS=Prunus persica (Peach) PE=4 SV=1	PREDICTED: uncharacterized protein LOC103433899 [Malus domestica]	PREDICTED: Malus x domestica uncharacterized LOC103433899 (LOC103433899), mRNA
CS2_vs_CS1	gene.MD04G1200000	6.11798e-21	-1.91713	down	[S]	Function unknown	--	K10532|0.0|pop:POPTR_1096163|hypothetical protein	--	Uncharacterized protein GN=PRUPE_ppa005302mg OS=Prunus persica (Peach) PE=4 SV=1	PREDICTED: heparan-alpha-glucosaminide N-acetyltransferase [Malus domestica]	PREDICTED: Malus x domestica heparan-alpha-glucosaminide N-acetyltransferase (LOC103433911), mRNA
CS2_vs_CS1	gene.MD04G1200100	1.50547e-32	Inf	up	--	--	--	--	--	Uncharacterized protein (Fragment) GN=PRUPE_ppa020756mg OS=Prunus persica (Peach) PE=4 SV=1	PREDICTED: SOSS complex subunit B homolog [Malus domestica]	PREDICTED: Malus x domestica SOSS complex subunit B homolog (LOC103433912), transcript variant X2, mRNA
CS2_vs_CS1	gene.MD04G1204000	5.84094e-153	1.54162	up	--	--	Molecular Function: iron ion binding (GO:0005506);; Molecular Function: linoleate 13S-lipoxygenase activity (GO:0016165);; Biological Process: oxylipin biosynthetic process (GO:0031408);; Biological Process: oxidation-reduction process (GO:0055114);;	--	Probable linoleate 9S-lipoxygenase 5 GN=LOX1.5 OS=Solanum tuberosum (Potato) PE=2 SV=1	Uncharacterized protein GN=PRUPE_ppa001216mg OS=Prunus persica (Peach) PE=4 SV=1	lipoxygenase [Malus domestica]	Malus domestica probable linoleate 9S-lipoxygenase 5 (LOC103433945), mRNA>gi|485451142|gb|KC706495.1| Malus x domestica clone 10 lipoxygenase (LOX7a) mRNA, complete cds
CS2_vs_CS1	gene.MD04G1206500	5.60309e-21	-1.22251	down	--	--	--	--	--	Uncharacterized protein GN=PRUPE_ppa000887mg OS=Prunus persica (Peach) PE=4 SV=1	PREDICTED: uncharacterized protein LOC103434099 [Malus domestica]	PREDICTED: Malus x domestica uncharacterized LOC103434099 (LOC103434099), mRNA
CS2_vs_CS1	gene.MD04G1207000	1.85555e-95	-3.51695	down	[J]	Translation, ribosomal structure and biogenesis	--	--	Amidase 1 GN=F7G19.15 OS=Arabidopsis thaliana (Mouse-ear cress) PE=1 SV=1	Uncharacterized protein GN=PRUPE_ppa005982mg OS=Prunus persica (Peach) PE=4 SV=1	PREDICTED: amidase 1-like [Malus domestica]	PREDICTED: Malus x domestica amidase 1-like (LOC103433962), transcript variant X2, misc_RNA
CS2_vs_CS1	gene.MD04G1208500	9.90158e-25	1.09756	up	[L]	Replication, recombination and repair	Biological Process: double-strand break repair via homologous recombination (GO:0000724);; Biological Process: nuclear-transcribed mRNA catabolic process (GO:0000956);; Molecular Function: damaged DNA binding (GO:0003684);; Cellular Component: nucleus (GO:0005634);; Biological Process: base-excision repair (GO:0006284);; Biological Process: nucleotide-excision repair, preincision complex assembly…	K10849|0.0|vvi:100244316|hypothetical protein LOC100244316	DNA excision repair protein ERCC-1 GN=T12H1.18 OS=Arabidopsis thaliana (Mouse-ear cress) PE=2 SV=1	Uncharacterized protein GN=PRUPE_ppa006720mg OS=Prunus persica (Peach) PE=4 SV=1	PREDICTED: DNA excision repair protein ERCC-1-like [Malus domestica]	PREDICTED: Malus x domestica DNA excision repair protein ERCC-1-like (LOC103427694), mRNA
CS2_vs_CS1	gene.MD04G1209800	0.00105192	-1.44565	down	--	--	--	--	--	Uncharacterized protein GN=PRUPE_ppa009363mg OS=Prunus persica (Peach) PE=4 SV=1	PREDICTED: 39S ribosomal protein L45, mitochondrial [Malus domestica]	PREDICTED: Malus x domestica 39S ribosomal protein L45, mitochondrial (LOC103450966), mRNA
CS2_vs_CS1	gene.MD04G1215600	1.63624e-16	1.72861	up	[QR]	--	Molecular Function: nicotianamine synthase activity (GO:0030410);; Biological Process: nicotianamine biosynthetic process (GO:0030418);;	K05953|2e-133|pop:POPTR_581960|hypothetical protein	Nicotianamine synthase GN=CHLN OS=Solanum lycopersicum (Tomato) PE=2 SV=1	Nicotianamine synthase OS=Malus xiaojinensis (Apple) PE=2 SV=1	PREDICTED: nicotianamine synthase-like [Malus domestica]	PREDICTED: Malus x domestica nicotianamine synthase-like (LOC103433868), mRNA
CS2_vs_CS1	gene.MD04G1219300	0.00162123	1.37436	up	[C]	Energy production and conversion	Biological Process: cellular process (GO:0009987);;	--	--	Uncharacterized protein GN=PRUPE_ppa011413mg OS=Prunus persica (Peach) PE=4 SV=1	PREDICTED: uncharacterized protein LOC103434144 [Malus domestica]	PREDICTED: Malus x domestica uncharacterized LOC103434144 (LOC103434144), mRNA
CS2_vs_CS1	gene.MD04G1219800	2.14655e-22	1.39466	up	[FJ]	--	Biological Process: metabolic process (GO:0008152);; Molecular Function: zinc ion binding (GO:0008270);; Molecular Function: guanine deaminase activity (GO:0008892);;	--	tRNA(adenine(34)) deaminase, chloroplastic (Precursor) GN=TADA OS=Arabidopsis thaliana (Mouse-ear cress) PE=1 SV=1	Uncharacterized protein GN=PRUPE_ppa011854mg OS=Prunus persica (Peach) PE=4 SV=1	PREDICTED: guanine deaminase [Malus domestica]	PREDICTED: Malus x domestica guanine deaminase (LOC103434142), mRNA
CS2_vs_CS1	gene.MD04G1221900	5.40997e-71	-3.05675	down	--	--	--	--	Trihelix transcription factor GTL2 GN=At5g28300 OS=Arabidopsis thaliana (Mouse-ear cress) PE=2 SV=1	Uncharacterized protein GN=PRUPE_ppa022417mg OS=Prunus persica (Peach) PE=4 SV=1	PREDICTED: trihelix transcription factor GTL2-like [Malus domestica]	PREDICTED: Malus x domestica trihelix transcription factor GTL2-like (LOC103434154), mRNA
CS2_vs_CS1	gene.MD04G1222500	1.53158e-10	-1.51759	down	[G]	Carbohydrate transport and metabolism	Biological Process: MAPK cascade (GO:0000165);; Molecular Function: ribose-5-phosphate isomerase activity (GO:0004751);; Biological Process: glycine catabolic process (GO:0006546);; Biological Process: tryptophan catabolic process (GO:0006569);; Biological Process: protein targeting to membrane (GO:0006612);; Biological Process: unsaturated fatty acid biosynthetic process (GO:0006636);; Biologica…	K01807|1e-143|vvi:100264080|hypothetical protein LOC100264080	Probable ribose-5-phosphate isomerase GN=At2g01290 OS=Arabidopsis thaliana (Mouse-ear cress) PE=2 SV=1	Uncharacterized protein GN=PRUPE_ppa009739mg OS=Prunus persica (Peach) PE=4 SV=1	PREDICTED: probable ribose-5-phosphate isomerase 3, chloroplastic [Malus domestica]	PREDICTED: Malus x domestica probable ribose-5-phosphate isomerase 3, chloroplastic (LOC103419496), transcript variant X4, mRNA
CS2_vs_CS1	gene.MD04G1225400	1.9606e-08	2.31953	up	--	--	Biological Process: defense response to bacterium (GO:0042742);; Biological Process: defense response to fungus (GO:0050832);;	--	Pathogenesis-related protein PR-4B (Precursor) OS=Nicotiana tabacum (Common tobacco) PE=2 SV=1	Pathogenesis-related protein 4 GN=PR4 OS=Malus domestica (Apple) PE=2 SV=1	pathogenesis-related protein 4 [Malus domestica]	Malus x domestica pathogenesis-related protein 4 (PR4) mRNA, complete cds
CS2_vs_CS1	gene.MD04G1226000	1.77089e-20	-1.44824	down	[R]	General function prediction only	Biological Process: karyogamy (GO:0000741);; Biological Process: protein folding (GO:0006457);; Biological Process: response to heat (GO:0009408);; Biological Process: embryo sac egg cell differentiation (GO:0009560);; Biological Process: response to high light intensity (GO:0009644);; Biological Process: response to endoplasmic reticulum stress (GO:0034976);; Biological Process: response to hydr…	--	Probable E3 ubiquitin-protein ligase XBOS33 OS=Oryza sativa subsp. japonica (Rice) PE=2 SV=1	Uncharacterized protein GN=PRUPE_ppa005939mg OS=Prunus persica (Peach) PE=4 SV=1	PREDICTED: putative ankyrin repeat protein RF_0381 [Malus domestica]	PREDICTED: Malus x domestica putative ankyrin repeat protein RF_0381 (LOC103434176), mRNA
CS2_vs_CS1	gene.MD04G1227400	0.00445545	-1.10757	down	--	--	Molecular Function: nucleic acid binding (GO:0003676);; Molecular Function: zinc ion binding (GO:0008270);;	--	--	Uncharacterized protein GN=PRUPE_ppa001819mg OS=Prunus persica (Peach) PE=4 SV=1	PREDICTED: uncharacterized protein LOC103419502 [Malus domestica]	PREDICTED: Malus x domestica uncharacterized LOC103419502 (LOC103419502), transcript variant X2, mRNA
CS2_vs_CS1	gene.MD04G1228500	1.44732e-19	-1.86672	down	[O]	Posttranslational modification, protein turnover, chaperones	Biological Process: protein peptidyl-prolyl isomerization (GO:0000413);; Biological Process: RNA methylation (GO:0001510);; Molecular Function: peptidyl-prolyl cis-trans isomerase activity (GO:0003755);; Cellular Component: mitochondrion (GO:0005739);; Cellular Component: Golgi apparatus (GO:0005794);; Cellular Component: cytosol (GO:0005829);; Biological Process: rRNA processing (GO:0006364);; B…	K01802|3e-90|rcu:RCOM_0608620|cyclophilin, putative (EC:5.2.1.8)	Peptidyl-prolyl cis-trans isomerase CYP19-3 GN=F18O21.30 OS=Arabidopsis thaliana (Mouse-ear cress) PE=2 SV=2	Uncharacterized protein GN=PRUPE_ppa012309mg OS=Prunus persica (Peach) PE=4 SV=1	PREDICTED: peptidyl-prolyl cis-trans isomerase CYP19-3-like [Malus domestica]	PREDICTED: Malus x domestica peptidyl-prolyl cis-trans isomerase CYP19-3-like (LOC103434199), mRNA
CS2_vs_CS1	gene.MD04G1230200	4.95643e-63	1.39605	up	--	--	--	--	Pentatricopeptide repeat-containing protein At1g08610 GN=At1g08610 OS=Arabidopsis thaliana (Mouse-ear cress) PE=2 SV=1	Uncharacterized protein GN=PRUPE_ppa025110mg OS=Prunus persica (Peach) PE=4 SV=1	PREDICTED: pentatricopeptide repeat-containing protein At1g08610 [Malus domestica]	PREDICTED: Malus x domestica pentatricopeptide repeat-containing protein At1g08610 (LOC103434207), mRNA
CS2_vs_CS1	gene.MD04G1231800	2.46653e-101	-1.46023	down	[J]	Translation, ribosomal structure and biogenesis	Biological Process: RNA methylation (GO:0001510);; Molecular Function: structural constituent of ribosome (GO:0003735);; Cellular Component: nucleolus (GO:0005730);; Cellular Component: mitochondrion (GO:0005739);; Biological Process: translation (GO:0006412);; Cellular Component: chloroplast (GO:0009507);; Biological Process: embryo development ending in seed dormancy (GO:0009793);; Cellular Com…	--	60S ribosomal protein L23 GN=T27C4.4 OS=Arabidopsis thaliana (Mouse-ear cress) PE=2 SV=3	Ribosomal protein L17 OS=Castanea sativa (Sweet chestnut) PE=2 SV=1	PREDICTED: 60S ribosomal protein L23 [Fragaria vesca subsp. vesca]	PREDICTED: Pyrus x bretschneideri 60S ribosomal protein L23 (LOC103935699), mRNA
CS2_vs_CS1	gene.MD04G1232500	4.74804e-15	1.00472	up	[RTKL]	--	Molecular Function: protein serine/threonine kinase activity (GO:0004674);; Molecular Function: ATP binding (GO:0005524);; Biological Process: protein phosphorylation (GO:0006468);; Cellular Component: integral component of membrane (GO:0016021);; Molecular Function: oxidoreductase activity (GO:0016491);; Biological Process: oxidation-reduction process (GO:0055114);;	--	Leucine-rich repeat receptor-like protein kinase PXL1 (Precursor) GN=PXL1 OS=Arabidopsis thaliana (Mouse-ear cress) PE=2 SV=1	Uncharacterized protein GN=PRUPE_ppa000734mg OS=Prunus persica (Peach) PE=4 SV=1	PREDICTED: leucine-rich repeat receptor-like protein kinase PXL1 [Malus domestica]	PREDICTED: Malus x domestica leucine-rich repeat receptor-like protein kinase PXL1 (LOC103427750), mRNA
CS2_vs_CS1	gene.MD04G1233200	1.9402e-05	-1.03486	down	[RTKL]	--	--	--	Probable receptor-like protein kinase At5g39030 (Precursor) GN=At5g39030 OS=Arabidopsis thaliana (Mouse-ear cress) PE=2 SV=1	Uncharacterized protein GN=PRUPE_ppa002693mg OS=Prunus persica (Peach) PE=4 SV=1	PREDICTED: rust resistance kinase Lr10-like [Malus domestica]	PREDICTED: Malus x domestica rust resistance kinase Lr10-like (LOC103434225), mRNA
CS2_vs_CS1	gene.MD04G1233500	3.58255e-22	5.24667	up	[P]	Inorganic ion transport and metabolism	Molecular Function: ammonium transmembrane transporter activity (GO:0008519);; Cellular Component: integral component of membrane (GO:0016021);; Biological Process: ammonium transmembrane transport (GO:0072488);;	--	Ammonium transporter 1 member 2 GN=AMT1-2 OS=Solanum lycopersicum (Tomato) PE=2 SV=1	High-affinity ammonium transporter GN=AMT1;2 OS=Malus hupehensis var. mengshanensis PE=2 SV=1	PREDICTED: ammonium transporter 1 member 2-like [Malus domestica]	PREDICTED: Malus x domestica ammonium transporter 1 member 2-like (LOC103414323), mRNA
CS2_vs_CS1	gene.MD04G1236100	0.000122761	-1.8966	down	[RTKL]	--	Molecular Function: protein serine/threonine kinase activity (GO:0004674);; Biological Process: phosphorylation (GO:0016310);;	--	Putative leucine-rich repeat receptor-like serine/threonine-protein kinase At2g19230 (Precursor) GN=At2g19230 OS=Arabidopsis thaliana (Mouse-ear cress) PE=2 SV=3	Uncharacterized protein GN=PRUPE_ppa025142mg OS=Prunus persica (Peach) PE=4 SV=1	PREDICTED: putative leucine-rich repeat receptor-like serine/threonine-protein kinase At2g19230, partial [Malus domestica]	PREDICTED: Malus x domestica putative leucine-rich repeat receptor-like serine/threonine-protein kinase At2g19230 (LOC103434354), partial mRNA
CS2_vs_CS1	gene.MD04G1236300	7.34671e-19	3.88103	up	--	--	--	--	F-box protein PP2-B1 GN=T16F16.2 OS=Arabidopsis thaliana (Mouse-ear cress) PE=1 SV=1	Uncharacterized protein GN=PRUPE_ppa008879mg OS=Prunus persica (Peach) PE=4 SV=1	PREDICTED: putative F-box protein PP2-B12 [Malus domestica]	PREDICTED: Malus x domestica putative F-box protein PP2-B12 (LOC103408676), mRNA
CS2_vs_CS1	gene.MD04G1238700	5.43391e-55	-1.45223	down	[RTKL]	--	--	--	Wall-associated receptor kinase-like 2 (Precursor) GN=WAKL2 OS=Arabidopsis thaliana (Mouse-ear cress) PE=2 SV=1	Uncharacterized protein GN=PRUPE_ppa002979mg OS=Prunus persica (Peach) PE=4 SV=1	PREDICTED: putative wall-associated receptor kinase-like 16 [Pyrus x bretschneideri]	PREDICTED: Malus x domestica protein LYK5-like (LOC103408727), mRNA
CS2_vs_CS1	gene.MD04G1239000	2.79229e-254	3.64298	up	[RTKL]	--	Molecular Function: nucleotide binding (GO:0000166);; Molecular Function: protein kinase activity (GO:0004672);; Biological Process: phosphorylation (GO:0016310);; Biological Process: cellular macromolecule metabolic process (GO:0044260);;	--	Wall-associated receptor kinase-like 4 (Precursor) GN=WAKL4 OS=Arabidopsis thaliana (Mouse-ear cress) PE=2 SV=2	Uncharacterized protein GN=PRUPE_ppa002979mg OS=Prunus persica (Peach) PE=4 SV=1	PREDICTED: putative wall-associated receptor kinase-like 16 [Malus domestica]	PREDICTED: Malus x domestica putative wall-associated receptor kinase-like 16 (LOC103427774), mRNA
CS2_vs_CS1	gene.MD04G1239300	2.92894e-37	1.2878	up	--	--	--	--	F-box protein At2g02240 GN=At2g02240 OS=Arabidopsis thaliana (Mouse-ear cress) PE=2 SV=1	Uncharacterized protein GN=PRUPE_ppa008879mg OS=Prunus persica (Peach) PE=4 SV=1	PREDICTED: F-box protein PP2-B10-like [Malus domestica]	PREDICTED: Malus x domestica F-box protein At2g02240-like (LOC103408726), transcript variant X2, mRNA
CS2_vs_CS1	gene.MD04G1239700	5.59987e-23	1.20301	up	[GC]	--	Molecular Function: sterol 3-beta-glucosyltransferase activity (GO:0016906);; Biological Process: lipid glycosylation (GO:0030259);;	--	Sterol 3-beta-glucosyltransferase UGT80A2 GN=UGT80A2 OS=Arabidopsis thaliana (Mouse-ear cress) PE=2 SV=1	Uncharacterized protein GN=PRUPE_ppa019814mg OS=Prunus persica (Peach) PE=4 SV=1	PREDICTED: sterol 3-beta-glucosyltransferase UGT80A2-like [Malus domestica]	PREDICTED: Malus x domestica sterol 3-beta-glucosyltransferase UGT80A2-like (LOC103408683), mRNA
CS2_vs_CS1	gene.MD04G1244500	6.13095e-27	1.22377	up	--	--	--	--	Probable tyrosine-protein phosphatase At1g05000 GN=At1g05000 OS=Arabidopsis thaliana (Mouse-ear cress) PE=1 SV=1	Uncharacterized protein GN=PRUPE_ppa011207mg OS=Prunus persica (Peach) PE=4 SV=1	PREDICTED: probable tyrosine-protein phosphatase At1g05000 [Malus domestica]	PREDICTED: Malus x domestica probable tyrosine-protein phosphatase At1g05000 (LOC103434267), mRNA
CS2_vs_CS1	gene.MD04G1245200	0.00326151	-1.40513	down	--	--	--	--	--	Uncharacterized protein GN=PRUPE_ppa017610mg OS=Prunus persica (Peach) PE=4 SV=1	PREDICTED: uncharacterized protein LOC103434272 [Malus domestica]	PREDICTED: Malus x domestica uncharacterized LOC103434272 (LOC103434272), mRNA
CS2_vs_CS1	gene.MD04G1245600	3.25791e-92	1.064	up	[T]	Signal transduction mechanisms	Molecular Function: phosphoprotein phosphatase activity (GO:0004721);; Cellular Component: nucleus (GO:0005634);; Biological Process: metabolic process (GO:0008152);;	--	Probable protein phosphatase 2C 33 GN=PPC6-1 OS=Arabidopsis thaliana (Mouse-ear cress) PE=1 SV=1	Uncharacterized protein GN=PRUPE_ppa004533mg OS=Prunus persica (Peach) PE=4 SV=1	PREDICTED: probable protein phosphatase 2C 33 [Malus domestica]	PREDICTED: Malus x domestica probable protein phosphatase 2C 33 (LOC103434276), mRNA
CS2_vs_CS1	gene.MD04G1248000	7.04341e-07	-1.28151	down	--	--	Molecular Function: nucleic acid binding (GO:0003676);; Molecular Function: protein serine/threonine phosphatase activity (GO:0004722);; Biological Process: regulation of transcription, DNA-templated (GO:0006355);; Biological Process: multicellular organismal development (GO:0007275);; Biological Process: posttranscriptional gene silencing by RNA (GO:0035194);; Biological Process: macromolecule m…	--	Putative metallophosphoesterase At3g03305 (Precursor) GN=At3g03305 OS=Arabidopsis thaliana (Mouse-ear cress) PE=2 SV=1	Uncharacterized protein GN=PRUPE_ppa002016mg OS=Prunus persica (Peach) PE=4 SV=1	PREDICTED: LOW QUALITY PROTEIN: putative metallophosphoesterase At3g03305 [Malus domestica]	PREDICTED: Malus x domestica putative metallophosphoesterase At3g03305 (LOC103427778), mRNA
CS2_vs_CS1	gene.MD04G1248400	6.05915e-06	1.18452	up	[G]	Carbohydrate transport and metabolism	Molecular Function: phosphatase activity (GO:0003869);; Biological Process: dephosphorylation (GO:0016311);;	K01101|0.0|vvi:100248028|hypothetical protein LOC100248028	Phosphoglycolate phosphatase 1B, chloroplastic (Precursor) GN=PGLP1B OS=Arabidopsis thaliana (Mouse-ear cress) PE=1 SV=1	Uncharacterized protein GN=PRUPE_ppa009109mg OS=Prunus persica (Peach) PE=4 SV=1	PREDICTED: phosphoglycolate phosphatase 1B, chloroplastic-like [Pyrus x bretschneideri]	PREDICTED: Pyrus x bretschneideri phosphoglycolate phosphatase 1B, chloroplastic-like (LOC103951833), mRNA
CS2_vs_CS1	gene.MD05G1000500	5.9889e-10	-1.31036	down	--	--	Biological Process: rRNA processing (GO:0006364);; Cellular Component: PSII associated light-harvesting complex II (GO:0009517);; Cellular Component: chloroplast stromal thylakoid (GO:0009533);; Biological Process: response to blue light (GO:0009637);; Biological Process: response to high light intensity (GO:0009644);; Biological Process: response to sucrose (GO:0009744);; Biological Process: pho…	K08916|7e-158|vvi:100246457|hypothetical protein LOC100246457	Chlorophyll a-b binding protein CP26, chloroplastic (Precursor) GN=LHCB5 OS=Arabidopsis thaliana (Mouse-ear cress) PE=2 SV=1	Uncharacterized protein GN=PRUPE_ppa009496mg OS=Prunus persica (Peach) PE=4 SV=1	PREDICTED: chlorophyll a-b binding protein CP26, chloroplastic-like [Malus domestica]	PREDICTED: Malus x domestica chlorophyll a-b binding protein CP26, chloroplastic-like (LOC103420118), mRNA
CS2_vs_CS1	gene.MD05G1001000	2.04033e-29	1.24659	up	--	--	--	--	PHD finger protein At1g33420 GN=At1g33420 OS=Arabidopsis thaliana (Mouse-ear cress) PE=1 SV=1	Uncharacterized protein GN=PRUPE_ppa002124mg OS=Prunus persica (Peach) PE=4 SV=1	PREDICTED: PHD finger protein At1g33420 [Pyrus x bretschneideri]	PREDICTED: Pyrus x bretschneideri PHD finger protein At1g33420 (LOC103956586), mRNA
CS2_vs_CS1	gene.MD05G1002200	4.0681e-06	1.56099	up	--	--	--	--	--	Nematode resistance-like protein GN=Ma OS=Prunus cerasifera (cherry plum) PE=4 SV=1	PREDICTED: TMV resistance protein N-like isoform X2 [Malus domestica]	PREDICTED: Malus x domestica TMV resistance protein N-like (LOC103425032), transcript variant X2, mRNA
CS2_vs_CS1	gene.MD05G1005900	2.46286e-16	-1.38824	down	--	--	--	--	Probable VAMP-like protein At1g33475 GN=At1g33475 OS=Arabidopsis thaliana (Mouse-ear cress) PE=2 SV=1	Uncharacterized protein GN=PRUPE_ppa009770mg OS=Prunus persica (Peach) PE=4 SV=1	PREDICTED: phytolongin Phyl1.1-like isoform X2 [Malus domestica]	PREDICTED: Malus x domestica phytolongin Phyl1.1-like (LOC103429426), transcript variant X2, mRNA
CS2_vs_CS1	gene.MD05G1006300	0.00206986	-1.50271	down	--	--	--	--	--	Uncharacterized protein GN=PRUPE_ppa009717mg OS=Prunus persica (Peach) PE=4 SV=1	PREDICTED: uncharacterized protein LOC103956576 [Pyrus x bretschneideri]	PREDICTED: Pyrus x bretschneideri uncharacterized LOC103956576 (LOC103956576), mRNA
CS2_vs_CS1	gene.MD05G1006400	4.68035e-07	1.9981	up	[M]	Cell wall/membrane/envelope biogenesis	Biological Process: sucrose metabolic process (GO:0005985);; Biological Process: biosynthetic process (GO:0009058);; Molecular Function: sucrose-phosphate synthase activity (GO:0046524);;	K00696|0.0|rcu:RCOM_1329250|sucrose phosphate syntase, putative (EC:2.4.1.14)	Probable sucrose-phosphate synthase 4 GN=F28M11.40 OS=Arabidopsis thaliana (Mouse-ear cress) PE=1 SV=1	Uncharacterized protein GN=PRUPE_ppa000716mg OS=Prunus persica (Peach) PE=4 SV=1	PREDICTED: probable sucrose-phosphate synthase 4 [Malus domestica]	PREDICTED: Malus x domestica probable sucrose-phosphate synthase 4 (LOC103411875), mRNA
CS2_vs_CS1	gene.MD05G1013400	5.9437e-05	-1.69764	down	[C]	Energy production and conversion	Molecular Function: zinc ion binding (GO:0008270);; Molecular Function: oxidoreductase activity (GO:0016491);; Biological Process: oxidation-reduction process (GO:0055114);;	K00001|0.0|pop:POPTR_718546|hypothetical protein	Alcohol dehydrogenase 1 OS=Pisum sativum (Garden pea) PE=1 SV=1	Alcohol dehydrogenase GN=ADH OS=Prunus dulcis x Prunus persica PE=2 SV=2	PREDICTED: alcohol dehydrogenase 1-like [Malus domestica]	PREDICTED: Malus x domestica alcohol dehydrogenase 1-like (LOC103409569), mRNA
CS2_vs_CS1	gene.MD05G1015200	6.70961e-09	1.29338	up	--	--	--	--	--	Uncharacterized protein (Fragment) GN=PRUPE_ppa024677mg OS=Prunus persica (Peach) PE=4 SV=1	PREDICTED: protein trichome berefringence-like 7 [Malus domestica]	PREDICTED: Malus x domestica protein trichome berefringence-like 7 (LOC103437220), transcript variant X2, mRNA
CS2_vs_CS1	gene.MD05G1016800	7.50668e-34	1.10657	up	--	--	--	--	--	Uncharacterized protein GN=PRUPE_ppa004953mg OS=Prunus persica (Peach) PE=4 SV=1	PREDICTED: transmembrane protein 184 homolog DDB_G0279555-like [Pyrus x bretschneideri]	PREDICTED: Pyrus x bretschneideri transmembrane protein 184 homolog DDB_G0279555-like (LOC103939739), transcript variant X2, mRNA
CS2_vs_CS1	gene.MD05G1017100	1.37047e-11	4.32996	up	--	--	--	--	Pathogen-related protein OS=Hordeum vulgare (Barley) PE=2 SV=2	Uncharacterized protein GN=PRUPE_ppa010660mg OS=Prunus persica (Peach) PE=4 SV=1	PREDICTED: pathogen-related protein-like [Pyrus x bretschneideri]	PREDICTED: Pyrus x bretschneideri pathogen-related protein-like (LOC103939740), mRNA
CS2_vs_CS1	gene.MD05G1017400	5.46964e-25	4.44073	up	--	--	--	--	Pathogen-related protein OS=Hordeum vulgare (Barley) PE=2 SV=2	Uncharacterized protein GN=PRUPE_ppa010729mg OS=Prunus persica (Peach) PE=4 SV=1	PREDICTED: pathogen-related protein-like [Malus domestica]	PREDICTED: Malus x domestica pathogen-related protein-like (LOC103402179), mRNA
CS2_vs_CS1	gene.MD05G1018200	1.86858e-16	1.07846	up	--	--	--	--	Dof zinc finger protein DOF1.2 GN=DOF1.2 OS=Arabidopsis thaliana (Mouse-ear cress) PE=2 SV=1	Uncharacterized protein GN=PRUPE_ppa008850mg OS=Prunus persica (Peach) PE=4 SV=1	PREDICTED: dof zinc finger protein DOF3.5 [Malus domestica]	PREDICTED: Malus x domestica dof zinc finger protein DOF3.5 (LOC103402173), mRNA
CS2_vs_CS1	gene.MD05G1020500	1.23058e-11	1.09548	up	--	--	--	--	U-box domain-containing protein 29 GN=PUB29 OS=Arabidopsis thaliana (Mouse-ear cress) PE=1 SV=1	Uncharacterized protein GN=PRUPE_ppa006448mg OS=Prunus persica (Peach) PE=4 SV=1	PREDICTED: U-box domain-containing protein 29-like [Malus domestica]	PREDICTED: Malus x domestica U-box domain-containing protein 29-like (LOC103402232), mRNA
CS2_vs_CS1	gene.MD05G1021100	0.00175018	1.13492	up	--	--	--	--	--	--	--	PREDICTED: Pyrus x bretschneideri uncharacterized LOC103957983 (LOC103957983), ncRNA
CS2_vs_CS1	gene.MD05G1021800	0.00346927	1.50589	up	--	--	--	--	--	--	PREDICTED: LOW QUALITY PROTEIN: uncharacterized protein LOC103402226 [Malus domestica]	PREDICTED: Malus x domestica uncharacterized LOC103402226 (LOC103402226), mRNA
CS2_vs_CS1	gene.MD05G1024800	2.98113e-216	4.81743	up	--	--	Cellular Component: membrane (GO:0016020);;	--	WAT1-related protein At1g43650 GN=At1g43650 OS=Arabidopsis thaliana (Mouse-ear cress) PE=2 SV=1	Uncharacterized protein GN=PRUPE_ppa008158mg OS=Prunus persica (Peach) PE=4 SV=1	PREDICTED: WAT1-related protein At1g43650-like isoform X1 [Malus domestica]	PREDICTED: Malus x domestica WAT1-related protein At1g43650-like (LOC103425306), transcript variant X1, mRNA
CS2_vs_CS1	gene.MD05G1028200	0.00995873	1.11202	up	[D]	Cell cycle control, cell division, chromosome partitioning	--	--	--	Uncharacterized protein GN=PRUPE_ppa005411mg OS=Prunus persica (Peach) PE=4 SV=1	PREDICTED: uncharacterized protein LOC103435473 [Malus domestica]	PREDICTED: Malus x domestica uncharacterized LOC103435473 (LOC103435473), mRNA
CS2_vs_CS1	gene.MD05G1033800	3.89215e-08	-1.87009	down	--	--	--	--	Tryptophan aminotransferase-related protein 4 OS=Arabidopsis thaliana (Mouse-ear cress) PE=2 SV=2	Uncharacterized protein GN=PRUPE_ppa005058mg OS=Prunus persica (Peach) PE=4 SV=1	PREDICTED: tryptophan aminotransferase-related protein 3-like [Malus domestica]	PREDICTED: Malus x domestica tryptophan aminotransferase-related protein 3-like (LOC103448895), mRNA
CS2_vs_CS1	gene.MD05G1037100	5.31031e-27	1.77604	up	--	--	Molecular Function: DNA binding (GO:0003677);; Molecular Function: transcription factor activity, sequence-specific DNA binding (GO:0003700);; Cellular Component: nucleus (GO:0005634);; Biological Process: regulation of transcription, DNA-templated (GO:0006355);; Molecular Function: protein dimerization activity (GO:0046983);;	--	MADS-box transcription factor 8 OS=Oryza sativa subsp. japonica (Rice) PE=1 SV=1	Flowering locus C-like protein GN=FLC OS=Pyrus pyrifolia var. culta PE=2 SV=1	PREDICTED: truncated transcription factor CAULIFLOWER A-like [Pyrus x bretschneideri]	Pyrus pyrifolia var. culta FLC mRNA for flowering locus C-like protein, complete cds
CS2_vs_CS1	gene.MD05G1041200	0.00319345	1.10569	up	--	--	Molecular Function: cGMP-dependent protein kinase activity (GO:0004692);; Molecular Function: ion channel activity (GO:0005216);; Molecular Function: calmodulin binding (GO:0005516);; Molecular Function: ATP binding (GO:0005524);; Biological Process: protein phosphorylation (GO:0006468);; Biological Process: ion transport (GO:0006811);; Biological Process: plant-type cell wall modification (GO:00…	--	Putative cyclic nucleotide-gated ion channel 8 GN=CNGC8 OS=Arabidopsis thaliana (Mouse-ear cress) PE=3 SV=2	Uncharacterized protein GN=PRUPE_ppa024071mg OS=Prunus persica (Peach) PE=4 SV=1	PREDICTED: putative cyclic nucleotide-gated ion channel 8 [Malus domestica]	PREDICTED: Malus x domestica putative cyclic nucleotide-gated ion channel 8 (LOC103443879), mRNA
CS2_vs_CS1	gene.MD05G1042400	2.11281e-08	-1.89443	down	--	--	--	--	--	Uncharacterized protein GN=PRUPE_ppa007184mg OS=Prunus persica (Peach) PE=4 SV=1	PREDICTED: hyccin-like [Malus domestica]	PREDICTED: Malus x domestica hyccin-like (LOC103443872), mRNA
CS2_vs_CS1	gene.MD05G1042700	1.31995e-88	-1.07319	down	[E]	Amino acid transport and metabolism	Molecular Function: 3-deoxy-7-phosphoheptulonate synthase activity (GO:0003849);; Molecular Function: protein binding (GO:0005515);; Biological Process: aromatic amino acid family biosynthetic process (GO:0009073);; Biological Process: chorismate biosynthetic process (GO:0009423);; Cellular Component: chloroplast thylakoid (GO:0009534);;	K01626|0.0|pop:POPTR_559072|DHS4	Phospho-2-dehydro-3-deoxyheptonate aldolase 2, chloroplastic (Precursor) GN=DHS2 OS=Arabidopsis thaliana (Mouse-ear cress) PE=2 SV=2	Uncharacterized protein GN=PRUPE_ppa004348mg OS=Prunus persica (Peach) PE=4 SV=1	PREDICTED: phospho-2-dehydro-3-deoxyheptonate aldolase 2, chloroplastic-like isoform X1 [Malus domestica]	PREDICTED: Malus x domestica phospho-2-dehydro-3-deoxyheptonate aldolase 2, chloroplastic-like (LOC103436603), transcript variant X1, mRNA
CS2_vs_CS1	gene.MD05G1042900	0	-2.52007	down	--	--	--	--	--	Uncharacterized protein GN=PRUPE_ppa009421mg OS=Prunus persica (Peach) PE=4 SV=1	PREDICTED: protein EXORDIUM-like 2 [Malus domestica]	PREDICTED: Malus x domestica protein EXORDIUM-like 2 (LOC103436601), mRNA
CS2_vs_CS1	gene.MD05G1044400	2.51504e-05	-2.31301	down	--	--	--	--	--	Uncharacterized protein GN=PRUPE_ppa009302mg OS=Prunus persica (Peach) PE=4 SV=1	PREDICTED: tobamovirus multiplication protein 1-like [Malus domestica]	PREDICTED: Malus x domestica tobamovirus multiplication protein 1-like (LOC103436580), mRNA
CS2_vs_CS1	gene.MD05G1047100	0.00334047	-1.35783	down	--	--	Biological Process: polysaccharide biosynthetic process (GO:0000271);; Molecular Function: signal transducer activity (GO:0004871);; Biological Process: phototropism (GO:0009638);; Biological Process: plant-type cell wall organization (GO:0009664);; Biological Process: blue light signaling pathway (GO:0009785);; Biological Process: multidimensional cell growth (GO:0009825);; Biological Process: p…	--	Root phototropism protein 3 GN=MSJ1.17 OS=Arabidopsis thaliana (Mouse-ear cress) PE=1 SV=2	Uncharacterized protein GN=PRUPE_ppa002411mg OS=Prunus persica (Peach) PE=4 SV=1	PREDICTED: root phototropism protein 3 [Malus domestica]	PREDICTED: Malus x domestica root phototropism protein 3 (LOC103436550), mRNA
CS2_vs_CS1	gene.MD05G1050100	6.78243e-07	-1.22355	down	--	--	--	--	--	Uncharacterized protein GN=PRUPE_ppa005256mg OS=Prunus persica (Peach) PE=4 SV=1	PREDICTED: uncharacterized protein LOC103940797 [Pyrus x bretschneideri]	PREDICTED: Malus x domestica uncharacterized LOC103436571 (LOC103436571), mRNA
CS2_vs_CS1	gene.MD05G1050200	7.15376e-25	-1.06509	down	[J]	Translation, ribosomal structure and biogenesis	Molecular Function: amidase activity (GO:0004040);; Molecular Function: transferase activity (GO:0016740);; Molecular Function: carbon-nitrogen ligase activity, with glutamine as amido-N-donor (GO:0016884);;	--	Fatty acid amide hydrolase GN=FAAH OS=Arabidopsis thaliana (Mouse-ear cress) PE=1 SV=1	Uncharacterized protein GN=PRUPE_ppa003050mg OS=Prunus persica (Peach) PE=4 SV=1	PREDICTED: fatty acid amide hydrolase-like [Malus domestica]	PREDICTED: Malus x domestica fatty acid amide hydrolase-like (LOC103430976), mRNA
CS2_vs_CS1	gene.MD05G1054800	2.982e-47	-3.04803	down	[R]	General function prediction only	Molecular Function: aldose-6-phosphate reductase (NADPH) activity (GO:0047641);; Biological Process: oxidation-reduction process (GO:0055114);;	--	NADP-dependent D-sorbitol-6-phosphate dehydrogenase GN=S6PDH OS=Malus domestica (Apple) PE=2 SV=1	Sorbitol-6-phosphate dehydrogenase 1 OS=Malus domestica (Apple) PE=4 SV=1	sorbitol-6-phosphate dehydrogenase 1 [Malus domestica]	PREDICTED: Pyrus x bretschneideri NADP-dependent D-sorbitol-6-phosphate dehydrogenase-like (LOC103967952), mRNA
CS2_vs_CS1	gene.MD05G1055000	8.9173e-65	-1.02009	down	[C]	Energy production and conversion	Cellular Component: vacuolar membrane (GO:0005774);; Cellular Component: plasma membrane (GO:0005886);; Molecular Function: hydrogen ion transmembrane transporter activity (GO:0015078);; Biological Process: ATP hydrolysis coupled proton transport (GO:0015991);; Cellular Component: integral component of membrane (GO:0016021);; Cellular Component: proton-transporting V-type ATPase, V0 domain (GO:00…	K02155|2e-73|pop:POPTR_551446|hypothetical protein	V-type proton ATPase 16 kDa proteolipid subunit OS=Kalanchoe daigremontiana (Devil&apos;s backbone) PE=2 SV=1	Vacuolar H+-ATPase, subunit C 2 GN=vatpc1 OS=Plantago major (Common plantain) PE=2 SV=1	PREDICTED: V-type proton ATPase 16 kDa proteolipid subunit [Pyrus x bretschneideri]	PREDICTED: Pyrus x bretschneideri V-type proton ATPase 16 kDa proteolipid subunit (LOC103967949), mRNA
CS2_vs_CS1	gene.MD05G1056900	9.66171e-28	1.79082	up	[V]	Defense mechanisms	Biological Process: drug transmembrane transport (GO:0006855);; Molecular Function: drug transmembrane transporter activity (GO:0015238);; Molecular Function: antiporter activity (GO:0015297);; Cellular Component: membrane (GO:0016020);;	--	MATE efflux family protein 4, chloroplastic (Precursor) GN=DTX46 OS=Arabidopsis thaliana (Mouse-ear cress) PE=2 SV=1	Uncharacterized protein GN=PRUPE_ppa003755mg OS=Prunus persica (Peach) PE=4 SV=1	PREDICTED: MATE efflux family protein 4, chloroplastic-like [Pyrus x bretschneideri]	PREDICTED: Pyrus x bretschneideri MATE efflux family protein 4, chloroplastic-like (LOC103965222), mRNA
CS2_vs_CS1	gene.MD05G1058100	2.38356e-14	1.34099	up	[Z]	Cytoskeleton	--	--	Kinesin-like protein NACK1 GN=NACK1 OS=Nicotiana tabacum (Common tobacco) PE=1 SV=1	Uncharacterized protein GN=PRUPE_ppa000583mg OS=Prunus persica (Peach) PE=4 SV=1	PREDICTED: kinesin-related protein 4-like isoform X2 [Pyrus x bretschneideri]	PREDICTED: Pyrus x bretschneideri kinesin-related protein 4-like (LOC103965223), transcript variant X2, mRNA
CS2_vs_CS1	gene.MD05G1063100	2.52242e-42	-1.17949	down	[E]	Amino acid transport and metabolism	Molecular Function: diaminopimelate decarboxylase activity (GO:0008836);; Biological Process: lysine biosynthetic process via diaminopimelate (GO:0009089);; Cellular Component: chloroplast (GO:0009507);;	K01586|0.0|pop:POPTR_557223|diaminopimelate decarboxylase (EC:4.1.1.20)	Diaminopimelate decarboxylase 1, chloroplastic (Precursor) GN=LYSA1 OS=Arabidopsis thaliana (Mouse-ear cress) PE=2 SV=1	Uncharacterized protein GN=PRUPE_ppa004857mg OS=Prunus persica (Peach) PE=4 SV=1	PREDICTED: diaminopimelate decarboxylase 1, chloroplastic-like [Malus domestica]	PREDICTED: Malus x domestica diaminopimelate decarboxylase 1, chloroplastic-like (LOC103448417), transcript variant X2, misc_RNA
CS2_vs_CS1	gene.MD05G1063400	2.68557e-250	-1.97035	down	[G]	Carbohydrate transport and metabolism	Biological Process: glycogen biosynthetic process (GO:0005978);; Molecular Function: glucose-1-phosphate adenylyltransferase activity (GO:0008878);; Cellular Component: chloroplast (GO:0009507);; Biological Process: starch biosynthetic process (GO:0019252);;	K00975|0.0|vvi:100253688|hypothetical protein LOC100253688	Glucose-1-phosphate adenylyltransferase large subunit 1 (Fragment) GN=AGPS1 OS=Solanum tuberosum (Potato) PE=2 SV=1	Uncharacterized protein GN=PRUPE_ppa004192mg OS=Prunus persica (Peach) PE=4 SV=1	PREDICTED: glucose-1-phosphate adenylyltransferase large subunit 1-like isoform X2 [Malus domestica]	PREDICTED: Malus x domestica glucose-1-phosphate adenylyltransferase large subunit 1-like (LOC103448413), transcript variant X2, mRNA
CS2_vs_CS1	gene.MD05G1067100	9.23664e-15	-2.17428	down	[RTKL]	--	--	--	Probable receptor-like serine/threonine-protein kinase At4g34500 GN=At4g34500 OS=Arabidopsis thaliana (Mouse-ear cress) PE=2 SV=1	Uncharacterized protein (Fragment) GN=PRUPE_ppa015739mg OS=Prunus persica (Peach) PE=4 SV=1	PREDICTED: probable receptor-like serine/threonine-protein kinase At4g34500 isoform X2 [Malus domestica]	PREDICTED: Malus x domestica probable receptor-like serine/threonine-protein kinase At4g34500 (LOC103439155), transcript variant X2, mRNA
CS2_vs_CS1	gene.MD05G1071900	7.66723e-88	1.00318	up	[IM]	--	Cellular Component: chloroplast stroma (GO:0009570);; Biological Process: isopentenyl diphosphate biosynthetic process, methylerythritol 4-phosphate pathway (GO:0019288);; Molecular Function: 4-hydroxy-3-methylbut-2-en-1-yl diphosphate synthase activity (GO:0046429);; Molecular Function: 4-hydroxy-3-methylbut-2-en-1-yl diphosphate reductase activity (GO:0051745);; Biological Process: oxidation-re…	K03527|0.0|pop:POPTR_557296|1-hydroxy-2-methyl-2-(E)-butenyl 4-diphosphate reductase (EC:1.17.1.2)	4-hydroxy-3-methylbut-2-enyl diphosphate reductase, chloroplastic (Precursor) GN=F10M10.120 OS=Arabidopsis thaliana (Mouse-ear cress) PE=2 SV=1	Uncharacterized protein GN=PRUPE_ppa005432mg OS=Prunus persica (Peach) PE=4 SV=1	PREDICTED: 4-hydroxy-3-methylbut-2-enyl diphosphate reductase, chloroplastic [Malus domestica]	PREDICTED: Malus x domestica 4-hydroxy-3-methylbut-2-enyl diphosphate reductase, chloroplastic (LOC103425754), mRNA
CS2_vs_CS1	gene.MD05G1073200	9.12422e-100	1.07884	up	--	--	--	--	--	Uncharacterized protein GN=PRUPE_ppa009922mg OS=Prunus persica (Peach) PE=4 SV=1	PREDICTED: CCG-binding protein 1-like [Malus domestica]	PREDICTED: Malus x domestica CCG-binding protein 1-like (LOC103416533), mRNA
CS2_vs_CS1	gene.MD05G1074900	3.81271e-14	-3.12142	down	--	--	Molecular Function: nucleotide binding (GO:0000166);; Molecular Function: RNA binding (GO:0003723);; Cellular Component: nucleus (GO:0005634);; Biological Process: RNA processing (GO:0006396);; Cellular Component: intracellular ribonucleoprotein complex (GO:0030529);;	--	--	Uncharacterized protein GN=PRUPE_ppa024894mg OS=Prunus persica (Peach) PE=4 SV=1	PREDICTED: la-related protein 6C [Malus domestica]	PREDICTED: Malus x domestica la-related protein 6C (LOC103454486), mRNA
CS2_vs_CS1	gene.MD05G1075200	7.95904e-14	1.27017	up	[O]	Posttranslational modification, protein turnover, chaperones	Biological Process: protein peptidyl-prolyl isomerization (GO:0000413);; Molecular Function: peptidyl-prolyl cis-trans isomerase activity (GO:0003755);; Cellular Component: cytosol (GO:0005829);; Biological Process: protein folding (GO:0006457);; Biological Process: vegetative phase change (GO:0010050);; Biological Process: floral meristem determinacy (GO:0010582);;	K05864|0.0|vvi:100262316|hypothetical protein LOC100262316	Peptidyl-prolyl cis-trans isomerase CYP40 GN=F19G14.21 OS=Arabidopsis thaliana (Mouse-ear cress) PE=2 SV=1	Uncharacterized protein GN=PRUPE_ppa007583mg OS=Prunus persica (Peach) PE=4 SV=1	PREDICTED: peptidyl-prolyl cis-trans isomerase CYP40 [Pyrus x bretschneideri]	PREDICTED: Pyrus x bretschneideri peptidyl-prolyl cis-trans isomerase CYP40 (LOC103942080), transcript variant X2, mRNA
CS2_vs_CS1	gene.MD05G1075300	1.18458e-20	-2.05405	down	--	--	Molecular Function: protein serine/threonine kinase activity (GO:0004674);; Molecular Function: calcium ion binding (GO:0005509);; Molecular Function: ATP binding (GO:0005524);; Biological Process: protein phosphorylation (GO:0006468);;	--	CDPK-related protein kinase GN=CRK OS=Daucus carota (Carrot) PE=2 SV=1	Uncharacterized protein GN=PRUPE_ppa003176mg OS=Prunus persica (Peach) PE=4 SV=1	PREDICTED: CDPK-related kinase 5 [Prunus mume]	PREDICTED: Pyrus x bretschneideri CDPK-related kinase 5-like (LOC103939094), mRNA
CS2_vs_CS1	gene.MD05G1078300	9.95052e-13	#NAME?	down	[R]	General function prediction only	--	K06972|8e-48|vvi:100255619|hypothetical protein LOC100255619	Presequence protease 1, chloroplastic/mitochondrial (Precursor) OS=Arabidopsis thaliana (Mouse-ear cress) PE=1 SV=2	Uncharacterized protein (Fragment) GN=PRUPE_ppa025698mg OS=Prunus persica (Peach) PE=4 SV=1	PREDICTED: presequence protease 1, chloroplastic/mitochondrial-like [Prunus mume]	PREDICTED: Pyrus x bretschneideri presequence protease 1, chloroplastic/mitochondrial-like (LOC103942665), mRNA
CS2_vs_CS1	gene.MD05G1080100	0.00122648	-1.04747	down	[TZDR]	--	Molecular Function: calcium ion binding (GO:0005509);; Cellular Component: mitochondrion (GO:0005739);;	K13448|7e-95|pop:POPTR_767565|hypothetical protein	Calmodulin-like protein 1 GN=CML1 OS=Arabidopsis thaliana (Mouse-ear cress) PE=2 SV=1	Uncharacterized protein GN=PRUPE_ppa011990mg OS=Prunus persica (Peach) PE=4 SV=1	PREDICTED: calmodulin-like protein 1 [Malus domestica]	PREDICTED: Malus x domestica calmodulin-like protein 1 (LOC103436500), mRNA
CS2_vs_CS1	gene.MD05G1081100	2.1582e-18	1.34085	up	[G]	Carbohydrate transport and metabolism	Molecular Function: alpha-amylase activity (GO:0004556);; Molecular Function: calcium ion binding (GO:0005509);; Biological Process: carbohydrate metabolic process (GO:0005975);;	K01176|0.0|vvi:100245165|hypothetical protein LOC100245165	Alpha-amylase (Precursor) GN=AMY1.1 OS=Vigna mungo (Black gram) PE=2 SV=1	Uncharacterized protein GN=PRUPE_ppa006152mg OS=Prunus persica (Peach) PE=4 SV=1	PREDICTED: alpha-amylase-like [Malus domestica]	PREDICTED: Malus x domestica alpha-amylase-like (LOC103436491), mRNA
CS2_vs_CS1	gene.MD05G1081700	0.000484535	1.19647	up	--	--	--	--	--	Uncharacterized protein GN=PRUPE_ppa017905mg OS=Prunus persica (Peach) PE=4 SV=1	PREDICTED: uncharacterized protein LOC103436489 [Malus domestica]	PREDICTED: Malus x domestica uncharacterized LOC103436489 (LOC103436489), transcript variant X4, mRNA
CS2_vs_CS1	gene.MD05G1082700	0.00314257	1.18342	up	[RTKL]	--	Molecular Function: protein serine/threonine kinase activity (GO:0004674);; Molecular Function: ATP binding (GO:0005524);; Biological Process: protein phosphorylation (GO:0006468);;	--	Probable receptor-like protein kinase At1g49730 (Precursor) GN=At1g49730 OS=Arabidopsis thaliana (Mouse-ear cress) PE=1 SV=1	Uncharacterized protein GN=PRUPE_ppa024164mg OS=Prunus persica (Peach) PE=4 SV=1	PREDICTED: probable receptor-like protein kinase At1g49730 isoform X3 [Pyrus x bretschneideri]	PREDICTED: Pyrus x bretschneideri probable receptor-like protein kinase At1g49730 (LOC103937998), transcript variant X3, mRNA
CS2_vs_CS1	gene.MD05G1083900	1.49864e-12	-1.31983	down	[R]	General function prediction only	Biological Process: coumarin biosynthetic process (GO:0009805);; Biological Process: lignin biosynthetic process (GO:0009809);; Biological Process: methylation (GO:0032259);; Molecular Function: caffeoyl-CoA O-methyltransferase activity (GO:0042409);; Biological Process: response to cadmium ion (GO:0046686);; Molecular Function: metal ion binding (GO:0046872);;	K00588|3e-174|pop:POPTR_649581|CAM1	Caffeoyl-CoA O-methyltransferase 1 GN=CCOAOMT1 OS=Populus trichocarpa (Western balsam poplar) PE=2 SV=1	Caffeoyl-CoA O-methyltransferase GN=CCoAOMT OS=Eriobotrya japonica PE=2 SV=1	PREDICTED: caffeoyl-CoA O-methyltransferase [Malus domestica]	PREDICTED: Malus x domestica caffeoyl-CoA O-methyltransferase (LOC103448267), mRNA
CS2_vs_CS1	gene.MD05G1087200	5.1552e-10	-2.51115	down	--	--	--	--	Elicitor-responsive protein 1 GN=ERG1 OS=Oryza sativa subsp. japonica (Rice) PE=2 SV=1	Uncharacterized protein GN=PRUPE_ppa009854mg OS=Prunus persica (Peach) PE=4 SV=1	PREDICTED: protein SRC2 homolog isoform X2 [Malus domestica]	PREDICTED: Malus x domestica protein SRC2 homolog (LOC103405699), transcript variant X2, mRNA
CS2_vs_CS1	gene.MD05G1088400	1.10123e-97	-1.2113	down	[HE]	--	Molecular Function: phosphoglycerate dehydrogenase activity (GO:0004617);; Molecular Function: ATP binding (GO:0005524);; Cellular Component: mitochondrion (GO:0005739);; Biological Process: L-serine biosynthetic process (GO:0006564);; Cellular Component: chloroplast (GO:0009507);; Biological Process: megagametogenesis (GO:0009561);; Cellular Component: membrane (GO:0016020);; Molecular Function:…	K00058|0.0|pop:POPTR_1069632|hypothetical protein	D-3-phosphoglycerate dehydrogenase, chloroplastic (Precursor) GN=At1g17745 OS=Arabidopsis thaliana (Mouse-ear cress) PE=1 SV=2	Uncharacterized protein GN=PRUPE_ppa003143mg OS=Prunus persica (Peach) PE=4 SV=1	PREDICTED: D-3-phosphoglycerate dehydrogenase 1, chloroplastic-like [Pyrus x bretschneideri]	PREDICTED: Malus x domestica D-3-phosphoglycerate dehydrogenase 1, chloroplastic-like (LOC103436439), misc_RNA
CS2_vs_CS1	gene.MD05G1089600	1.54302e-09	-1.39553	down	[KAD]	--	Molecular Function: DNA binding (GO:0003677);; Molecular Function: chromatin binding (GO:0003682);; Biological Process: response to stress (GO:0006950);; Biological Process: response to hormone (GO:0009725);; Biological Process: response to oxygen-containing compound (GO:1901700);;	--	Transcription factor MYB44 GN=K8K14.2 OS=Arabidopsis thaliana (Mouse-ear cress) PE=2 SV=1	MYB domain class transcription factor GN=MYB3 OS=Malus domestica (Apple) PE=2 SV=1	PREDICTED: transcription factor MYB44-like [Malus domestica]	PREDICTED: Malus x domestica transcription factor MYB44-like (LOC103436434), mRNA
CS2_vs_CS1	gene.MD05G1092300	1.81728e-59	-6.06876	down	--	--	--	K14487|0.0|vvi:100250741|hypothetical protein LOC100250741	Probable indole-3-acetic acid-amido synthetase GH3.1 GN=GH3.1 OS=Arabidopsis thaliana (Mouse-ear cress) PE=2 SV=1	Uncharacterized protein GN=PRUPE_ppa003134mg OS=Prunus persica (Peach) PE=4 SV=1	PREDICTED: probable indole-3-acetic acid-amido synthetase GH3.1 [Malus domestica]	PREDICTED: Malus x domestica probable indole-3-acetic acid-amido synthetase GH3.1 (LOC103436425), mRNA
CS2_vs_CS1	gene.MD05G1098700	2.33999e-07	-2.22055	down	[IQ]	--	Cellular Component: plasmodesma (GO:0009506);; Cellular Component: chloroplast stroma (GO:0009570);; Biological Process: positive regulation of seed germination (GO:0010030);; Biological Process: response to nitrate (GO:0010167);; Biological Process: seed coat development (GO:0010214);; Biological Process: nitrate transport (GO:0015706);; Molecular Function: AMP binding (GO:0016208);; Biological …	--	4-coumarate--CoA ligase-like 10 GN=T2J13.170 OS=Arabidopsis thaliana (Mouse-ear cress) PE=2 SV=1	Uncharacterized protein GN=PRUPE_ppa004215mg OS=Prunus persica (Peach) PE=4 SV=1	PREDICTED: oxalate--CoA ligase-like [Malus domestica]	PREDICTED: Malus x domestica oxalate--CoA ligase-like (LOC103422599), mRNA
CS2_vs_CS1	gene.MD05G1100300	3.73278e-06	2.36337	up	--	--	--	--	Mitochondrial outer membrane protein porin 2 GN=VDAC2 OS=Arabidopsis thaliana (Mouse-ear cress) PE=1 SV=1	Uncharacterized protein GN=PRUPE_ppa016048mg OS=Prunus persica (Peach) PE=4 SV=1	PREDICTED: mitochondrial outer membrane protein porin 2-like [Prunus mume]	Prunus persica hypothetical protein (PRUPE_ppa016048mg) mRNA, complete cds
CS2_vs_CS1	gene.MD05G1100600	0.000129849	2.3141	up	[P]	Inorganic ion transport and metabolism	Biological Process: sulfate assimilation (GO:0000103);; Molecular Function: adenylylsulfate kinase activity (GO:0004020);; Molecular Function: ATP binding (GO:0005524);; Biological Process: phosphorylation (GO:0016310);; Molecular Function: 2-alkenal reductase [NAD(P)] activity (GO:0032440);; Biological Process: oxidation-reduction process (GO:0055114);; Biological Process: hydrogen sulfide biosy…	K00860|4e-127|rcu:RCOM_0834620|adenylsulfate kinase, putative (EC:1.3.1.74)	Adenylyl-sulfate kinase 1, chloroplastic (Precursor) GN=AKN1 OS=Arabidopsis thaliana (Mouse-ear cress) PE=1 SV=1	Uncharacterized protein GN=PRUPE_ppa010961mg OS=Prunus persica (Peach) PE=4 SV=1	PREDICTED: adenylyl-sulfate kinase 3-like [Malus domestica]	PREDICTED: Malus x domestica adenylyl-sulfate kinase 3-like (LOC103436118), transcript variant X1, mRNA
CS2_vs_CS1	gene.MD05G1102100	0.00142663	1.1565	up	[D]	Cell cycle control, cell division, chromosome partitioning	--	K10151|8e-65|pop:POPTR_804326|hypothetical protein	Cyclin-D1-1 GN=F20P5.7 OS=Arabidopsis thaliana (Mouse-ear cress) PE=1 SV=3	Uncharacterized protein GN=PRUPE_ppa024287mg OS=Prunus persica (Peach) PE=4 SV=1	PREDICTED: cyclin-D1-1-like [Malus domestica]	PREDICTED: Malus x domestica cyclin-D1-1-like (LOC103431473), transcript variant X7, mRNA
CS2_vs_CS1	gene.MD05G1106800	0	-2.25812	down	[Z]	Cytoskeleton	Molecular Function: GTPase activity (GO:0003924);; Molecular Function: structural constituent of cytoskeleton (GO:0005200);; Molecular Function: GTP binding (GO:0005525);; Cellular Component: cytoplasm (GO:0005737);; Cellular Component: microtubule (GO:0005874);; Biological Process: obsolete GTP catabolic process (GO:0006184);; Biological Process: microtubule-based process (GO:0007017);; Biologic…	K07374|0.0|rcu:RCOM_1584620|tubulin alpha chain, putative	Tubulin alpha chain GN=TUBA OS=Prunus dulcis (Almond) PE=2 SV=1	Alpha tubulin 1 GN=AT1 OS=Pseudotsuga menziesii var. menziesii PE=3 SV=1	PREDICTED: tubulin alpha chain [Malus domestica]	PREDICTED: Malus x domestica tubulin alpha chain (LOC103436316), mRNA
CS2_vs_CS1	gene.MD05G1109000	5.41306e-05	-1.177	down	--	--	--	--	--	Uncharacterized protein GN=PRUPE_ppa015088mg OS=Prunus persica (Peach) PE=4 SV=1	PREDICTED: trigger factor-like [Malus domestica]	PREDICTED: Malus x domestica trigger factor-like (LOC103427657), mRNA
CS2_vs_CS1	gene.MD05G1111200	1.1129e-11	-1.37239	down	[F]	Nucleotide transport and metabolism	Molecular Function: magnesium ion binding (GO:0000287);; Molecular Function: adenylosuccinate synthase activity (GO:0004019);; Molecular Function: GTP binding (GO:0005525);; Cellular Component: chloroplast (GO:0009507);; Biological Process: 'de novo' AMP biosynthetic process (GO:0044208);;	K01939|0.0|rcu:RCOM_0089930|adenylosuccinate synthetase, putative (EC:6.3.4.4)	Adenylosuccinate synthetase 2, chloroplastic (Precursor) GN=PURA2 OS=Ricinus communis (Castor bean) PE=3 SV=1	Uncharacterized protein GN=PRUPE_ppa004750mg OS=Prunus persica (Peach) PE=4 SV=1	PREDICTED: adenylosuccinate synthetase 2, chloroplastic [Malus domestica]	PREDICTED: Malus x domestica adenylosuccinate synthetase 2, chloroplastic (LOC103436466), mRNA
CS2_vs_CS1	gene.MD05G1112600	2.8256e-16	1.8445	up	[RTKL]	--	--	--	Receptor-like protein kinase HAIKU2 (Precursor) GN=IKU2 OS=Arabidopsis thaliana (Mouse-ear cress) PE=1 SV=1	Uncharacterized protein GN=PRUPE_ppa000895mg OS=Prunus persica (Peach) PE=4 SV=1	PREDICTED: receptor-like protein kinase HAIKU2 [Malus domestica]	PREDICTED: Malus x domestica receptor-like protein kinase HAIKU2 (LOC103436247), mRNA
CS2_vs_CS1	gene.MD05G1113100	3.06957e-73	1.6987	up	[C]	Energy production and conversion	Molecular Function: aldo-keto reductase (NADP) activity (GO:0004033);; Molecular Function: glutamate dehydrogenase [NAD(P)+] activity (GO:0004353);; Cellular Component: cytosol (GO:0005829);; Biological Process: cellular amino acid metabolic process (GO:0006520);; Molecular Function: L-galactose dehydrogenase activity (GO:0010349);; Biological Process: L-ascorbic acid biosynthetic process (GO:001…	K00064|0.0|rcu:RCOM_0816860|aldo-keto reductase, putative (EC:1.1.1.107)	L-galactose dehydrogenase GN=LGALDH OS=Arabidopsis thaliana (Mouse-ear cress) PE=1 SV=1	L-galactose dehydrogenase OS=Malus domestica (Apple) PE=2 SV=1	L-galactose dehydrogenase [Malus domestica]	Malus x domestica L-galactose dehydrogenase mRNA, complete cds
CS2_vs_CS1	gene.MD05G1113300	1.72991e-27	7.36828	up	--	--	--	K14488|2e-37|pop:POPTR_649291|SAUR69	Auxin-induced protein 6B OS=Glycine max (Soybean) PE=2 SV=1	Uncharacterized protein GN=PRUPE_ppa026539mg OS=Prunus persica (Peach) PE=4 SV=1	PREDICTED: auxin-induced protein 15A-like [Malus domestica]	PREDICTED: Malus x domestica auxin-induced protein 15A-like (LOC103436243), mRNA
CS2_vs_CS1	gene.MD05G1115700	3.33021e-50	-1.21745	down	[G]	Carbohydrate transport and metabolism	Molecular Function: triose-phosphate isomerase activity (GO:0004807);; Biological Process: glycolytic process (GO:0006096);; Cellular Component: chloroplast (GO:0009507);; Biological Process: reductive pentose-phosphate cycle (GO:0019253);;	K01803|2e-166|vvi:100260576|hypothetical protein LOC100260576	Triosephosphate isomerase, chloroplastic (Precursor) GN=TPI OS=Fragaria ananassa (Strawberry) PE=1 SV=1	Uncharacterized protein GN=PRUPE_ppa007813mg OS=Prunus persica (Peach) PE=4 SV=1	PREDICTED: triosephosphate isomerase, chloroplastic [Pyrus x bretschneideri]	PREDICTED: Pyrus x bretschneideri triosephosphate isomerase, chloroplastic (LOC103938349), mRNA
CS2_vs_CS1	gene.MD05G1118700	1.01417e-22	-1.7035	down	--	--	--	--	Thaumatin-like protein 1a (Precursor) GN=TL1 OS=Malus domestica (Apple) PE=1 SV=1	Uncharacterized protein GN=PRUPE_ppa009841mg OS=Prunus persica (Peach) PE=4 SV=1	PREDICTED: thaumatin-like protein 1b [Malus domestica]	PREDICTED: Malus x domestica thaumatin-like protein 1b (LOC103436251), mRNA
CS2_vs_CS1	gene.MD05G1120100	1.44097e-21	-1.80747	down	[O]	Posttranslational modification, protein turnover, chaperones	Molecular Function: serine-type endopeptidase activity (GO:0004252);; Cellular Component: extracellular region (GO:0005576);; Biological Process: proteolysis (GO:0006508);; Molecular Function: identical protein binding (GO:0042802);; Biological Process: negative regulation of catalytic activity (GO:0043086);;	--	Subtilisin-like protease (Precursor) GN=K8K14.8 OS=Arabidopsis thaliana (Mouse-ear cress) PE=1 SV=1	Uncharacterized protein GN=PRUPE_ppa001754mg OS=Prunus persica (Peach) PE=4 SV=1	PREDICTED: subtilisin-like protease SBT1.6 [Malus domestica]	PREDICTED: Malus x domestica subtilisin-like protease SBT1.6 (LOC103440818), mRNA
CS2_vs_CS1	gene.MD05G1121200	1.71292e-11	1.25105	up	--	--	Molecular Function: ubiquitin-protein transferase activity (GO:0004842);; Biological Process: protein ubiquitination (GO:0016567);; Biological Process: DNA endoreduplication (GO:0042023);; Biological Process: proteasome-mediated ubiquitin-dependent protein catabolic process (GO:0043161);; Biological Process: proteasome assembly (GO:0043248);; Biological Process: regulation of unidimensional cell …	--	Ubiquitin-conjugating enzyme E2 28 GN=F22C12.2 OS=Arabidopsis thaliana (Mouse-ear cress) PE=2 SV=1	Uncharacterized protein GN=PRUPE_ppa012939mg OS=Prunus persica (Peach) PE=4 SV=1	PREDICTED: ubiquitin-conjugating enzyme E2 28-like [Malus domestica]	PREDICTED: Malus x domestica ubiquitin-conjugating enzyme E2 28-like (LOC103421030), mRNA
CS2_vs_CS1	gene.MD05G1121900	5.26512e-51	-1.95254	down	[G]	Carbohydrate transport and metabolism	--	--	Beta-glucosidase 24 (Precursor) OS=Oryza sativa subsp. japonica (Rice) PE=2 SV=1	Uncharacterized protein GN=PRUPE_ppa004226mg OS=Prunus persica (Peach) PE=4 SV=1	PREDICTED: cyanogenic beta-glucosidase-like isoform X1 [Malus domestica]	PREDICTED: Malus x domestica beta-glucosidase 12-like (LOC103410606), transcript variant X1, mRNA
CS2_vs_CS1	gene.MD05G1122000	1.74166e-55	1.52465	up	--	--	--	--	--	Uncharacterized protein GN=PRUPE_ppa026502mg OS=Prunus persica (Peach) PE=4 SV=1	PREDICTED: probable BOI-related E3 ubiquitin-protein ligase 2 [Malus domestica]	PREDICTED: Malus x domestica probable BOI-related E3 ubiquitin-protein ligase 2 (LOC103440804), mRNA
CS2_vs_CS1	gene.MD05G1131800	3.51322e-15	-1.80431	down	[MG]	--	Cellular Component: chloroplast (GO:0009507);;	--	Uncharacterized protein ycf39 GN=ycf39 OS=Cyanophora paradoxa PE=3 SV=1	Uncharacterized protein GN=PRUPE_ppa006565mg OS=Prunus persica (Peach) PE=4 SV=1	PREDICTED: uncharacterized protein ycf39-like [Malus domestica]	PREDICTED: Malus x domestica uncharacterized protein ycf39-like (LOC108173015), mRNA
CS2_vs_CS1	gene.MD05G1134200	8.98952e-44	1.97805	up	--	--	Cellular Component: ubiquitin ligase complex (GO:0000151);; Molecular Function: ubiquitin-protein transferase activity (GO:0004842);; Biological Process: protein ubiquitination (GO:0016567);;	--	U-box domain-containing protein 15 GN=PUB15 OS=Arabidopsis thaliana (Mouse-ear cress) PE=2 SV=2	Uncharacterized protein GN=PRUPE_ppa002658mg OS=Prunus persica (Peach) PE=4 SV=1	PREDICTED: U-box domain-containing protein 15-like [Malus domestica]	PREDICTED: Malus x domestica U-box domain-containing protein 15-like (LOC103436196), mRNA
CS2_vs_CS1	gene.MD05G1135400	5.10516e-140	-4.12483	down	--	--	--	--	--	Putative uncharacterized protein GN=RCOM_0600270 OS=Ricinus communis (Castor bean) PE=4 SV=1	PREDICTED: protein EXORDIUM-like 5 [Ricinus communis]	PREDICTED: Malus x domestica protein EXORDIUM-like 5 (LOC103436198), mRNA
CS2_vs_CS1	gene.MD05G1140900	1.44396e-08	1.14603	up	--	--	--	--	--	Uncharacterized protein GN=PRUPE_ppa012997mg OS=Prunus persica (Peach) PE=4 SV=1	PREDICTED: uncharacterized protein LOC103412130 [Malus domestica]	PREDICTED: Malus x domestica uncharacterized LOC103440924 (LOC103440924), mRNA
CS2_vs_CS1	gene.MD05G1146700	0.00671573	-1.31304	down	--	--	--	--	--	--	--	PREDICTED: Malus x domestica uncharacterized LOC108173466 (LOC108173466), ncRNA
CS2_vs_CS1	gene.MD05G1146900	2.55252e-07	1.44824	up	--	--	--	--	Chloride channel protein CLC-e OS=Arabidopsis thaliana (Mouse-ear cress) PE=2 SV=2	Putative uncharacterized protein GN=VIT_03s0038g04260 OS=Vitis vinifera (Grape) PE=2 SV=1	PREDICTED: chloride channel protein CLC-e-like [Malus domestica]	PREDICTED: Malus x domestica chloride channel protein CLC-e-like (LOC103402491), mRNA
CS2_vs_CS1	gene.MD05G1155000	0.00172232	1.38503	up	--	--	--	--	--	--	--	PREDICTED: Malus x domestica uncharacterized LOC108173603 (LOC108173603), ncRNA
CS2_vs_CS1	gene.MD05G1155100	5.94729e-303	2.16313	up	[E]	Amino acid transport and metabolism	Biological Process: branched-chain amino acid biosynthetic process (GO:0009082);; Molecular Function: transferase activity, transferring acyl groups, acyl groups converted into alkyl on transfer (GO:0046912);;	K01649|0.0|pop:POPTR_861364|2-isopropylmalate synthase (EC:2.3.3.13)	2-isopropylmalate synthase A GN=IPMSA OS=Solanum pennellii (Tomato) PE=2 SV=1	Uncharacterized protein GN=Solyc08g014130.2 OS=Solanum lycopersicum (Tomato) PE=3 SV=1	PREDICTED: 2-isopropylmalate synthase A-like [Malus domestica]	PREDICTED: Malus x domestica 2-isopropylmalate synthase A-like (LOC103409760), mRNA
CS2_vs_CS1	gene.MD05G1156200	0.000102436	-1.00655	down	--	--	--	--	Protein FAR1-RELATED SEQUENCE 5 GN=FRS5 OS=Arabidopsis thaliana (Mouse-ear cress) PE=2 SV=1	Uncharacterized protein GN=PRUPE_ppa011264mg OS=Prunus persica (Peach) PE=4 SV=1	PREDICTED: protein FAR1-RELATED SEQUENCE 7-like isoform X2 [Pyrus x bretschneideri]	PREDICTED: Malus x domestica protein FAR-RED IMPAIRED RESPONSE 1-like (LOC103420350), mRNA
CS2_vs_CS1	gene.MD05G1158100	2.92973e-05	-1.67018	down	--	--	--	K10727|6e-131|vvi:100263560|hypothetical protein LOC100263560	CDT1-like protein a, chloroplastic (Precursor) GN=CDT1A OS=Arabidopsis thaliana (Mouse-ear cress) PE=1 SV=1	Uncharacterized protein (Fragment) GN=PRUPE_ppa025145mg OS=Prunus persica (Peach) PE=4 SV=1	PREDICTED: CDT1-like protein a, chloroplastic [Pyrus x bretschneideri]	PREDICTED: Pyrus x bretschneideri CDT1-like protein a, chloroplastic (LOC103949567), mRNA
CS2_vs_CS1	gene.MD05G1158200	4.09077e-101	-1.14812	down	--	--	Molecular Function: serine-type carboxypeptidase activity (GO:0004185);; Cellular Component: vacuole (GO:0005773);; Biological Process: proteolysis (GO:0006508);;	K13289|0.0|rcu:RCOM_1627120|serine carboxypeptidase, putative (EC:3.4.16.5)	Serine carboxypeptidase-like 20 (Precursor) GN=SCPL20 OS=Arabidopsis thaliana (Mouse-ear cress) PE=2 SV=2	Uncharacterized protein GN=PRUPE_ppa004538mg OS=Prunus persica (Peach) PE=4 SV=1	PREDICTED: serine carboxypeptidase-like 20 isoform X1 [Pyrus x bretschneideri]	PREDICTED: Pyrus x bretschneideri serine carboxypeptidase-like 20 (LOC103949576), transcript variant X1, mRNA>gi|694356308|ref|XM_009360697.1| PREDICTED: Pyrus x bretschneideri serine carboxypeptidase-like 20 (LOC103949576), transcript variant X2, mRNA
CS2_vs_CS1	gene.MD05G1158700	0.000698304	-1.47727	down	--	--	--	--	Transcription factor HEC1 GN=K21H1.2 OS=Arabidopsis thaliana (Mouse-ear cress) PE=1 SV=1	Uncharacterized protein GN=PRUPE_ppa012566mg OS=Prunus persica (Peach) PE=4 SV=1	PREDICTED: transcription factor IBH1-like [Malus domestica]	PREDICTED: Malus x domestica transcription factor IBH1-like (LOC103433320), mRNA
CS2_vs_CS1	gene.MD05G1163300	1.49287e-08	1.53859	up	--	--	--	--	--	Predicted protein GN=POPTRDRAFT_709767 OS=Populus trichocarpa (Western balsam poplar) PE=4 SV=1	PREDICTED: dCTP pyrophosphatase 1-like [Malus domestica]	PREDICTED: Malus x domestica dCTP pyrophosphatase 1-like (LOC103435914), mRNA
CS2_vs_CS1	gene.MD05G1164000	2.49219e-102	-1.1055	down	--	--	--	--	Auxin-induced in root cultures protein 12 (Precursor) GN=AIR12 OS=Arabidopsis thaliana (Mouse-ear cress) PE=1 SV=3	Uncharacterized protein GN=PRUPE_ppa006889mg OS=Prunus persica (Peach) PE=4 SV=1	PREDICTED: cytochrome b561 and DOMON domain-containing protein At4g12980-like [Malus domestica]	PREDICTED: Malus x domestica cytochrome b561 and DOMON domain-containing protein At4g12980-like (LOC103435901), mRNA
CS2_vs_CS1	gene.MD05G1164900	0.000343631	-1.47546	down	[RTKL]	--	--	--	Serine/threonine-protein kinase OXI1 GN=MJL12.21 OS=Arabidopsis thaliana (Mouse-ear cress) PE=1 SV=1	Uncharacterized protein GN=PRUPE_ppa006149mg OS=Prunus persica (Peach) PE=4 SV=1	PREDICTED: serine/threonine-protein kinase OXI1 [Malus domestica]	PREDICTED: Malus x domestica serine/threonine-protein kinase OXI1 (LOC103435899), mRNA
CS2_vs_CS1	gene.MD05G1165400	1.585e-05	-1.04766	down	--	--	--	--	U-box domain-containing protein 9 GN=PUB9 OS=Arabidopsis thaliana (Mouse-ear cress) PE=1 SV=1	Uncharacterized protein GN=PRUPE_ppa005537mg OS=Prunus persica (Peach) PE=4 SV=1	PREDICTED: U-box domain-containing protein 9-like isoform X1 [Malus domestica]	PREDICTED: Malus x domestica U-box domain-containing protein 9-like (LOC103409186), transcript variant X1, mRNA
CS2_vs_CS1	gene.MD05G1168800	1.10011e-09	1.85572	up	[CR]	--	--	--	Quinone-oxidoreductase homolog, chloroplastic GN=QOR OS=Spinacia oleracea (Spinach) PE=1 SV=1	Uncharacterized protein GN=PRUPE_ppa008401mg OS=Prunus persica (Peach) PE=4 SV=1	PREDICTED: putative quinone-oxidoreductase homolog, chloroplastic [Malus domestica]	PREDICTED: Malus x domestica putative quinone-oxidoreductase homolog, chloroplastic (LOC103435875), mRNA
CS2_vs_CS1	gene.MD05G1169500	1.48874e-24	2.71266	up	[DKL]	--	Biological Process: regulation of cellular metabolic process (GO:0031323);; Biological Process: cellular macromolecule metabolic process (GO:0044260);; Biological Process: regulation of cell cycle (GO:0051726);; Biological Process: regulation of macromolecule metabolic process (GO:0060255);; Biological Process: regulation of primary metabolic process (GO:0080090);;	--	Cyclin-C1-2 GN=CYCC1-2 OS=Arabidopsis thaliana (Mouse-ear cress) PE=2 SV=1	Uncharacterized protein GN=PRUPE_ppa010335mg OS=Prunus persica (Peach) PE=4 SV=1	PREDICTED: cyclin-C1-2-like [Pyrus x bretschneideri]	PREDICTED: Malus x domestica cyclin-C1-2-like (LOC103435871), transcript variant X4, mRNA
CS2_vs_CS1	gene.MD05G1169600	5.58851e-168	8.9782	up	[Q]	Secondary metabolites biosynthesis, transport and catabolism	Molecular Function: iron ion binding (GO:0005506);; Molecular Function: electron carrier activity (GO:0009055);; Molecular Function: flavonoid 3'-monooxygenase activity (GO:0016711);; Molecular Function: heme binding (GO:0020037);; Biological Process: oxidation-reduction process (GO:0055114);;	--	Cytochrome P450 82G1 GN=CYP82G1 OS=Arabidopsis thaliana (Mouse-ear cress) PE=1 SV=1	Uncharacterized protein GN=PRUPE_ppa004095mg OS=Prunus persica (Peach) PE=4 SV=1	PREDICTED: cytochrome P450 82G1-like [Malus domestica]	PREDICTED: Malus x domestica cytochrome P450 82G1-like (LOC103435869), mRNA
CS2_vs_CS1	gene.MD05G1170900	0.000352663	1.49297	up	--	--	--	--	Wound-induced basic protein GN=PR4 OS=Phaseolus vulgaris (Kidney bean) PE=2 SV=1	Uncharacterized protein (Fragment) GN=PRUPE_ppa022347mg OS=Prunus persica (Peach) PE=4 SV=1	PREDICTED: LOW QUALITY PROTEIN: wound-induced basic protein [Malus domestica]	PREDICTED: Malus x domestica wound-induced basic protein (LOC103419919), mRNA
CS2_vs_CS1	gene.MD05G1172400	9.4296e-56	-1.23582	down	--	--	Biological Process: response to bacterium (GO:0009617);; Biological Process: plant-type hypersensitive response (GO:0009626);; Cellular Component: membrane (GO:0016020);; Biological Process: regulation of innate immune response (GO:0045088);; Biological Process: regulation of cellular process (GO:0050794);;	K13456|4e-97|pop:POPTR_709976|hypothetical protein	RPM1-interacting protein 4 GN=RIN4 OS=Arabidopsis thaliana (Mouse-ear cress) PE=1 SV=1	RIN4-like protein GN=RIN4-2 OS=Malus domestica (Apple) PE=2 SV=1	RPM1-interacting protein 4 [Malus domestica]	Malus domestica RPM1-interacting protein 4 (RIN4-2), mRNA>gi|215789966|gb|FJ265822.1| Malus x domestica RIN4-like protein (RIN4-2) mRNA, complete cds
CS2_vs_CS1	gene.MD05G1173700	3.60519e-29	-2.84129	down	[O]	Posttranslational modification, protein turnover, chaperones	--	K12160|1e-51|rcu:RCOM_1719400|hypothetical protein	Small ubiquitin-related modifier 2 GN=MCO15.11 OS=Arabidopsis thaliana (Mouse-ear cress) PE=1 SV=1	Uncharacterized protein GN=PRUPE_ppa013826mg OS=Prunus persica (Peach) PE=4 SV=1	PREDICTED: small ubiquitin-related modifier 1-like [Malus domestica]	PREDICTED: Malus x domestica small ubiquitin-related modifier 1-like (LOC103435843), mRNA
CS2_vs_CS1	gene.MD05G1173800	0.00063694	-1.00735	down	--	--	--	K10949|9e-138|pop:POPTR_549820|hypothetical protein	ER lumen protein retaining receptor GN=ERD2 OS=Petunia hybrida (Petunia) PE=2 SV=1	Uncharacterized protein GN=PRUPE_ppa011313mg OS=Prunus persica (Peach) PE=4 SV=1	PREDICTED: ER lumen protein-retaining receptor [Malus domestica]	PREDICTED: Malus x domestica ER lumen protein-retaining receptor (LOC103435841), mRNA
CS2_vs_CS1	gene.MD05G1174000	1.49794e-34	1.04903	up	--	--	Molecular Function: acid phosphatase activity (GO:0003993);; Molecular Function: protein serine/threonine phosphatase activity (GO:0004722);; Biological Process: seed germination (GO:0009845);; Biological Process: pollen germination (GO:0009846);; Molecular Function: metal ion binding (GO:0046872);;	--	Purple acid phosphatase 15 (Precursor) GN=T1B9.21 OS=Arabidopsis thaliana (Mouse-ear cress) PE=1 SV=1	Uncharacterized protein GN=PRUPE_ppa002773mg OS=Prunus persica (Peach) PE=4 SV=1	PREDICTED: purple acid phosphatase 15-like [Malus domestica]	PREDICTED: Malus x domestica purple acid phosphatase 15-like (LOC103409175), mRNA
CS2_vs_CS1	gene.MD05G1174100	1.66572e-09	-1.14766	down	--	--	--	--	--	Uncharacterized protein GN=PRUPE_ppa007571mg OS=Prunus persica (Peach) PE=4 SV=1	PREDICTED: uncharacterized protein LOC103409173 [Malus domestica]	PREDICTED: Malus x domestica uncharacterized LOC103409173 (LOC103409173), mRNA
CS2_vs_CS1	gene.MD05G1174800	8.33641e-12	-1.93502	down	[S]	Function unknown	--	--	--	Uncharacterized protein GN=PRUPE_ppa007147mg OS=Prunus persica (Peach) PE=4 SV=1	PREDICTED: uncharacterized protein LOC103435836 isoform X1 [Malus domestica]	PREDICTED: Malus x domestica uncharacterized LOC103435836 (LOC103435836), transcript variant X1, mRNA
CS2_vs_CS1	gene.MD05G1175500	3.06009e-06	-2.38716	down	--	--	--	--	--	Uncharacterized protein GN=PRUPE_ppa013085mg OS=Prunus persica (Peach) PE=4 SV=1	PREDICTED: uncharacterized protein LOC103435832 [Malus domestica]	PREDICTED: Malus x domestica uncharacterized LOC103435832 (LOC103435832), mRNA
CS2_vs_CS1	gene.MD05G1176500	0.000378491	1.62767	up	--	--	Cellular Component: nucleus (GO:0005634);;	--	DeSI-like protein At4g17486 GN=At4g17486 OS=Arabidopsis thaliana (Mouse-ear cress) PE=2 SV=1	Uncharacterized protein GN=PRUPE_ppa009934mg OS=Prunus persica (Peach) PE=4 SV=1	PREDICTED: desumoylating isopeptidase 1 [Malus domestica]	PREDICTED: Malus x domestica desumoylating isopeptidase 1 (LOC103435823), mRNA
CS2_vs_CS1	gene.MD05G1178100	2.02041e-101	2.70989	up	--	--	--	--	--	Uncharacterized protein GN=PRUPE_ppa009399mg OS=Prunus persica (Peach) PE=4 SV=1	PREDICTED: protein SULFUR DEFICIENCY-INDUCED 1 [Malus domestica]	PREDICTED: Malus x domestica protein SULFUR DEFICIENCY-INDUCED 1 (LOC103435818), mRNA
CS2_vs_CS1	gene.MD05G1179800	1.59352e-55	-1.29786	down	[C]	Energy production and conversion	--	K00001|0.0|vvi:100250633|hypothetical protein LOC100250633	Alcohol dehydrogenase GN=ADH OS=Malus domestica (Apple) PE=2 SV=1	Uncharacterized protein GN=PRUPE_ppa007137mg OS=Prunus persica (Peach) PE=4 SV=1	PREDICTED: alcohol dehydrogenase-like [Malus domestica]	PREDICTED: Malus x domestica alcohol dehydrogenase-like (LOC103435799), mRNA
CS2_vs_CS1	gene.MD05G1182500	1.08108e-34	-1.02857	down	[O]	Posttranslational modification, protein turnover, chaperones	Molecular Function: ATP binding (GO:0005524);; Cellular Component: cytoplasm (GO:0005737);; Biological Process: response to stress (GO:0006950);; Biological Process: protein refolding (GO:0042026);;	K04077|0.0|vvi:100244356|similar to GroEL-like chaperone, ATPase	Chaperonin CPN60-2, mitochondrial (Precursor) GN=CPN60-2 OS=Cucurbita maxima (Pumpkin) PE=1 SV=1	Putative uncharacterized protein GN=VIT_05s0051g00340 OS=Vitis vinifera (Grape) PE=3 SV=1	PREDICTED: chaperonin CPN60-2, mitochondrial [Malus domestica]	PREDICTED: Malus x domestica chaperonin CPN60-2, mitochondrial (LOC103435791), mRNA
CS2_vs_CS1	gene.MD05G1182700	1.08148e-08	-2.22683	down	[T]	Signal transduction mechanisms	Molecular Function: phosphorelay response regulator activity (GO:0000156);; Biological Process: phosphorelay signal transduction system (GO:0000160);; Biological Process: regulation of transcription, DNA-templated (GO:0006355);; Molecular Function: kinase activity (GO:0016301);; Biological Process: phosphorylation (GO:0016310);; Biological Process: intracellular signal transduction (GO:0035556);;	--	Two-component response regulator ARR22 GN=ARR22 OS=Arabidopsis thaliana (Mouse-ear cress) PE=2 SV=1	Uncharacterized protein GN=PRUPE_ppa020702mg OS=Prunus persica (Peach) PE=4 SV=1	PREDICTED: two-component response regulator ARR22 [Malus domestica]	PREDICTED: Malus x domestica two-component response regulator ARR22 (LOC103435790), mRNA
CS2_vs_CS1	gene.MD05G1187100	1.26418e-132	1.24243	up	[V]	Defense mechanisms	Molecular Function: ATP binding (GO:0005524);; Biological Process: obsolete ATP catabolic process (GO:0006200);; Molecular Function: organic phosphonate transmembrane-transporting ATPase activity (GO:0015416);; Cellular Component: membrane (GO:0016020);;	--	Pleiotropic drug resistance protein 1 GN=PDR1 OS=Nicotiana tabacum (Common tobacco) PE=2 SV=1	Uncharacterized protein GN=PRUPE_ppa000227mg OS=Prunus persica (Peach) PE=4 SV=1	PREDICTED: pleiotropic drug resistance protein 1-like [Malus domestica]	PREDICTED: Malus x domestica pleiotropic drug resistance protein 1-like (LOC103409154), mRNA
CS2_vs_CS1	gene.MD05G1189400	7.77165e-119	1.4715	up	--	--	Molecular Function: binding (GO:0005488);;	--	Protein PHR1-LIKE 1 GN=PHL1 OS=Arabidopsis thaliana (Mouse-ear cress) PE=1 SV=1	Uncharacterized protein GN=PRUPE_ppa004886mg OS=Prunus persica (Peach) PE=4 SV=1	PREDICTED: protein PHR1-LIKE 1-like isoform X1 [Malus domestica]	PREDICTED: Malus x domestica protein PHR1-LIKE 1-like (LOC103435752), transcript variant X3, mRNA
CS2_vs_CS1	gene.MD05G1193200	8.06883e-14	-1.96817	down	[E]	Amino acid transport and metabolism	Molecular Function: long-chain-alcohol oxidase activity (GO:0046577);; Molecular Function: flavin adenine dinucleotide binding (GO:0050660);; Biological Process: oxidation-reduction process (GO:0055114);;	--	Long-chain-alcohol oxidase FAO2 GN=FAO2 OS=Lotus japonicus (Lotus corniculatus var. japonicus) PE=2 SV=1	Uncharacterized protein GN=PRUPE_ppa018458mg OS=Prunus persica (Peach) PE=4 SV=1	PREDICTED: long-chain-alcohol oxidase FAO2-like [Malus domestica]	PREDICTED: Malus x domestica long-chain-alcohol oxidase FAO2-like (LOC103428007), mRNA
CS2_vs_CS1	gene.MD05G1197700	6.29682e-08	1.31977	up	--	--	Cellular Component: mitochondrion (GO:0005739);; Biological Process: auxin polar transport (GO:0009926);; Cellular Component: chloroplast envelope (GO:0009941);; Biological Process: response to UV-B (GO:0010224);;	--	--	Uncharacterized protein GN=PRUPE_ppa006051mg OS=Prunus persica (Peach) PE=4 SV=1	PREDICTED: UPF0420 protein C16orf58 homolog [Pyrus x bretschneideri]	PREDICTED: Malus x domestica protein root UVB sensitive 2, chloroplastic-like (LOC103419819), mRNA
CS2_vs_CS1	gene.MD05G1197900	1.04453e-126	-2.08349	down	--	--	Molecular Function: actin binding (GO:0003779);; Cellular Component: actin cytoskeleton (GO:0015629);; Biological Process: actin filament depolymerization (GO:0030042);;	K05765|7e-82|rcu:RCOM_1214220|actin depolymerizing factor, putative	Actin-depolymerizing factor OS=Vitis vinifera (Grape) PE=2 SV=1	Actin depolymerizing factor GN=ADF OS=Malus domestica (Apple) PE=2 SV=1	PREDICTED: actin-depolymerizing factor isoform X2 [Malus domestica]	PREDICTED: Malus x domestica actin-depolymerizing factor (LOC103419821), transcript variant X2, mRNA
CS2_vs_CS1	gene.MD05G1198100	1.4023e-177	-1.59475	down	[GEPR]	--	Molecular Function: inorganic phosphate transmembrane transporter activity (GO:0005315);; Biological Process: phosphate ion transport (GO:0006817);; Cellular Component: integral component of membrane (GO:0016021);; Biological Process: transmembrane transport (GO:0055085);;	--	Probable inorganic phosphate transporter 1-7 GN=PHT1-7 OS=Arabidopsis thaliana (Mouse-ear cress) PE=2 SV=2	Uncharacterized protein GN=PRUPE_ppa003959mg OS=Prunus persica (Peach) PE=4 SV=1	PREDICTED: probable inorganic phosphate transporter 1-7, partial [Malus domestica]	PREDICTED: Malus x domestica probable inorganic phosphate transporter 1-7 (LOC103419864), partial mRNA
CS2_vs_CS1	gene.MD05G1198900	3.08318e-16	2.88015	up	--	--	--	--	Ethylene-responsive transcription factor ERF098 GN=ERF098 OS=Arabidopsis thaliana (Mouse-ear cress) PE=1 SV=1	Uncharacterized protein GN=PRUPE_ppa023368mg OS=Prunus persica (Peach) PE=4 SV=1	PREDICTED: ethylene-responsive transcription factor ERF096-like [Pyrus x bretschneideri]	PREDICTED: Pyrus x bretschneideri ethylene-responsive transcription factor ERF096-like (LOC103946039), mRNA
CS2_vs_CS1	gene.MD05G1199500	3.67372e-08	-1.30172	down	[R]	General function prediction only	Biological Process: protein folding (GO:0006457);; Biological Process: pyrimidine ribonucleotide biosynthetic process (GO:0009220);; Biological Process: response to heat (GO:0009408);; Biological Process: response to high light intensity (GO:0009644);; Biological Process: response to endoplasmic reticulum stress (GO:0034976);; Biological Process: response to hydrogen peroxide (GO:0042542);;	--	--	Uncharacterized protein GN=PRUPE_ppa002883mg OS=Prunus persica (Peach) PE=4 SV=1	PREDICTED: uncharacterized protein LOC103946038 [Pyrus x bretschneideri]	PREDICTED: Pyrus x bretschneideri uncharacterized LOC103946038 (LOC103946038), transcript variant X3, misc_RNA
CS2_vs_CS1	gene.MD05G1203200	6.29945e-14	1.92003	up	--	--	--	--	--	Uncharacterized protein GN=PRUPE_ppa021794mg OS=Prunus persica (Peach) PE=4 SV=1	PREDICTED: probable myosin-binding protein 4 [Malus domestica]	PREDICTED: Malus x domestica probable myosin-binding protein 4 (LOC103435711), mRNA
CS2_vs_CS1	gene.MD05G1205800	4.90645e-24	-1.52514	down	--	--	Cellular Component: nucleus (GO:0005634);; Biological Process: regulation of transcription, DNA-templated (GO:0006355);; Biological Process: auxin-activated signaling pathway (GO:0009734);; Molecular Function: protein dimerization activity (GO:0046983);;	--	Auxin-induced protein AUX28 GN=AUX28 OS=Glycine max (Soybean) PE=2 SV=1	Uncharacterized protein GN=PRUPE_ppa010342mg OS=Prunus persica (Peach) PE=4 SV=1	PREDICTED: auxin-induced protein AUX28-like [Malus domestica]	PREDICTED: Malus x domestica auxin-induced protein AUX28-like (LOC103435680), mRNA
CS2_vs_CS1	gene.MD05G1206900	4.46748e-23	-1.12122	down	[E]	Amino acid transport and metabolism	Biological Process: amino acid transmembrane transport (GO:0003333);; Cellular Component: plasma membrane (GO:0005886);; Molecular Function: amino acid transmembrane transporter activity (GO:0015171);; Cellular Component: integral component of membrane (GO:0016021);; Cellular Component: intracellular membrane-bounded organelle (GO:0043231);;	--	Cationic amino acid transporter 8, vacuolar GN=CAT8 OS=Arabidopsis thaliana (Mouse-ear cress) PE=1 SV=1	Uncharacterized protein GN=PRUPE_ppa003337mg OS=Prunus persica (Peach) PE=4 SV=1	PREDICTED: cationic amino acid transporter 8, vacuolar-like [Malus domestica]	PREDICTED: Malus x domestica cationic amino acid transporter 8, vacuolar-like (LOC103419883), mRNA
CS2_vs_CS1	gene.MD05G1207300	8.46203e-15	1.30292	up	[Q]	Secondary metabolites biosynthesis, transport and catabolism	Molecular Function: oxidoreductase activity, acting on single donors with incorporation of molecular oxygen, incorporation of two atoms of oxygen (GO:0016702);;	K09840|0.0|pop:POPTR_1116639|9-cis-epoxycarotenoid dioxygenase (EC:1.13.11.51)	9-cis-epoxycarotenoid dioxygenase NCED1, chloroplastic (Precursor) GN=NCED1 OS=Phaseolus vulgaris (Kidney bean) PE=2 SV=1	Uncharacterized protein GN=PRUPE_ppa002804mg OS=Prunus persica (Peach) PE=4 SV=1	PREDICTED: 9-cis-epoxycarotenoid dioxygenase NCED1, chloroplastic-like [Malus domestica]	PREDICTED: Malus x domestica 9-cis-epoxycarotenoid dioxygenase NCED1, chloroplastic-like (LOC103441488), mRNA
CS2_vs_CS1	gene.MD05G1208700	6.84324e-175	1.99187	up	--	--	--	--	1-aminocyclopropane-1-carboxylate oxidase homolog 9 GN=At5g43440 OS=Arabidopsis thaliana (Mouse-ear cress) PE=2 SV=1	Uncharacterized protein GN=PRUPE_ppa021625mg OS=Prunus persica (Peach) PE=4 SV=1	PREDICTED: probable inactive 2-oxoglutarate-dependent dioxygenase AOP2 [Malus domestica]	PREDICTED: Malus x domestica probable inactive 2-oxoglutarate-dependent dioxygenase AOP2 (LOC103452965), mRNA
CS2_vs_CS1	gene.MD05G1209400	2.25029e-13	-2.9617	down	[R]	General function prediction only	--	--	Tricin synthase 1 OS=Oryza sativa subsp. japonica (Rice) PE=1 SV=1	Uncharacterized protein (Fragment) GN=PRUPE_ppa014561mg OS=Prunus persica (Peach) PE=4 SV=1	PREDICTED: tricin synthase 1-like [Pyrus x bretschneideri]	PREDICTED: Pyrus x bretschneideri tricin synthase 1-like (LOC103945959), mRNA
CS2_vs_CS1	gene.MD05G1210000	6.45026e-42	-1.22488	down	[O]	Posttranslational modification, protein turnover, chaperones	--	--	Probable glutathione S-transferase OS=Nicotiana tabacum (Common tobacco) PE=2 SV=1	Uncharacterized protein OS=Glycine max (Soybean) PE=3 SV=1	PREDICTED: probable glutathione S-transferase [Malus domestica]	PREDICTED: Malus x domestica probable glutathione S-transferase (LOC103435649), mRNA
CS2_vs_CS1	gene.MD05G1210100	1.39519e-29	-1.49589	down	[O]	Posttranslational modification, protein turnover, chaperones	--	--	Probable glutathione S-transferase OS=Nicotiana tabacum (Common tobacco) PE=2 SV=1	Uncharacterized protein GN=PRUPE_ppb009345mg OS=Prunus persica (Peach) PE=4 SV=1	PREDICTED: probable glutathione S-transferase isoform X1 [Malus domestica]	PREDICTED: Malus x domestica probable glutathione S-transferase (LOC103424011), transcript variant X1, mRNA
CS2_vs_CS1	gene.MD05G1210200	6.49996e-19	-1.96975	down	[O]	Posttranslational modification, protein turnover, chaperones	--	--	Probable glutathione S-transferase OS=Nicotiana tabacum (Common tobacco) PE=2 SV=1	Uncharacterized protein GN=PRUPE_ppb009345mg OS=Prunus persica (Peach) PE=4 SV=1	PREDICTED: probable glutathione S-transferase isoform X1 [Malus domestica]	PREDICTED: Malus x domestica probable glutathione S-transferase (LOC103414617), mRNA
CS2_vs_CS1	gene.MD05G1220600	6.02744e-21	-1.8289	down	--	--	--	--	Protein ROOT PRIMORDIUM DEFECTIVE 1 GN=RPD1 OS=Arabidopsis thaliana (Mouse-ear cress) PE=1 SV=1	Uncharacterized protein GN=PRUPE_ppa007448mg OS=Prunus persica (Peach) PE=4 SV=1	PREDICTED: protein ROOT PRIMORDIUM DEFECTIVE 1-like [Malus domestica]	PREDICTED: Malus x domestica protein ROOT PRIMORDIUM DEFECTIVE 1-like (LOC103427948), mRNA
CS2_vs_CS1	gene.MD05G1220800	0	-3.58787	down	[J]	Translation, ribosomal structure and biogenesis	--	K03234|0.0|rcu:RCOM_1068970|eukaryotic translation elongation factor, putative	Elongation factor 2 OS=Beta vulgaris (Sugar beet) PE=2 SV=1	Translation elongation factor 2 GN=TEF2 OS=Prunus persica (Peach) PE=2 SV=1	PREDICTED: elongation factor 2 [Prunus mume]	PREDICTED: Pyrus x bretschneideri elongation factor 2-like (LOC103952007), misc_RNA
CS2_vs_CS1	gene.MD05G1229400	1.94012e-14	1.13829	up	[RTKL]	--	Molecular Function: protein kinase activity (GO:0004672);; Biological Process: phosphorylation (GO:0016310);;	--	Serine/threonine-protein kinase CTR1 GN=CTR1 OS=Arabidopsis thaliana (Mouse-ear cress) PE=1 SV=1	Uncharacterized protein GN=PRUPE_ppa000365mg OS=Prunus persica (Peach) PE=4 SV=1	PREDICTED: uncharacterized protein LOC103435396, partial [Malus domestica]	PREDICTED: Malus x domestica uncharacterized LOC103435396 (LOC103435396), partial mRNA
CS2_vs_CS1	gene.MD05G1231600	3.24626e-19	-2.11535	down	--	--	--	--	G-type lectin S-receptor-like serine/threonine-protein kinase At4g27290 (Precursor) GN=At4g27290 OS=Arabidopsis thaliana (Mouse-ear cress) PE=3 SV=4	Serine/threonine-protein kinase GN=VIT_19s0014g04270 OS=Vitis vinifera (Grape) PE=3 SV=1	PREDICTED: G-type lectin S-receptor-like serine/threonine-protein kinase SD1-1 [Malus domestica]	PREDICTED: Malus x domestica uncharacterized LOC108171534 (LOC108171534), transcript variant X2, ncRNA
CS2_vs_CS1	gene.MD05G1235200	1.90466e-05	-1.68094	down	--	--	Molecular Function: metal ion binding (GO:0046872);;	--	--	Uncharacterized protein GN=PRUPE_ppa006684mg OS=Prunus persica (Peach) PE=4 SV=1	PREDICTED: programmed cell death protein 2-like [Malus domestica]	PREDICTED: Malus x domestica programmed cell death protein 2-like (LOC103435377), transcript variant X2, mRNA
CS2_vs_CS1	gene.MD05G1237400	1.56064e-06	1.38177	up	--	--	--	--	--	--	PREDICTED: uncharacterized protein LOC103419842 [Malus domestica]	PREDICTED: Malus x domestica uncharacterized LOC103427935 (LOC103427935), transcript variant X2, ncRNA
CS2_vs_CS1	gene.MD05G1239600	9.37513e-45	1.02219	up	--	--	--	--	E3 ubiquitin-protein ligase RGLG2 GN=RGLG2 OS=Arabidopsis thaliana (Mouse-ear cress) PE=1 SV=1	Uncharacterized protein GN=PRUPE_ppa007341mg OS=Prunus persica (Peach) PE=4 SV=1	PREDICTED: E3 ubiquitin-protein ligase RGLG2 [Pyrus x bretschneideri]	PREDICTED: Pyrus x bretschneideri E3 ubiquitin-protein ligase RGLG2 (LOC103953305), mRNA
CS2_vs_CS1	gene.MD05G1242300	6.32378e-107	-1.35045	down	--	--	Molecular Function: copper ion binding (GO:0005507);; Molecular Function: calcium ion binding (GO:0005509);; Molecular Function: calmodulin binding (GO:0005516);; Molecular Function: phosphatidylinositol-3,4,5-trisphosphate binding (GO:0005547);; Cellular Component: vacuole (GO:0005773);; Biological Process: response to cold (GO:0009409);; Cellular Component: chloroplast (GO:0009507);; Biological…	--	Plasma membrane-associated cation-binding protein 1 GN=F1C12.180 OS=Arabidopsis thaliana (Mouse-ear cress) PE=1 SV=1	Uncharacterized protein GN=PRUPE_ppa011141mg OS=Prunus persica (Peach) PE=4 SV=1	PREDICTED: plasma membrane-associated cation-binding protein 1-like [Malus domestica]	PREDICTED: Malus x domestica plasma membrane-associated cation-binding protein 1-like (LOC103435331), transcript variant X2, mRNA
CS2_vs_CS1	gene.MD05G1242500	7.66771e-33	6.90505	up	--	--	Cellular Component: integral component of membrane (GO:0016021);;	--	Probable purine permease 4 GN=PUP4 OS=Arabidopsis thaliana (Mouse-ear cress) PE=2 SV=1	Uncharacterized protein GN=PRUPE_ppa022736mg OS=Prunus persica (Peach) PE=4 SV=1	PREDICTED: probable purine permease 4 [Malus domestica]	PREDICTED: Malus x domestica probable purine permease 4 (LOC103435329), mRNA
CS2_vs_CS1	gene.MD05G1244800	0.00181561	-1.39416	down	--	--	--	--	--	Uncharacterized protein GN=PRUPE_ppa004855mg OS=Prunus persica (Peach) PE=4 SV=1	PREDICTED: protein PLASTID TRANSCRIPTIONALLY ACTIVE 14-like isoform X1 [Malus domestica]	PREDICTED: Malus x domestica protein PLASTID TRANSCRIPTIONALLY ACTIVE 14-like (LOC103409022), transcript variant X2, mRNA
CS2_vs_CS1	gene.MD05G1246900	7.85694e-09	-1.58782	down	[R]	General function prediction only	Molecular Function: RNA binding (GO:0003723);; Molecular Function: GTP binding (GO:0005525);; Cellular Component: cytosol (GO:0005829);; Biological Process: endocytosis (GO:0006897);;	--	GTP-binding protein ERG GN=ERG OS=Antirrhinum majus (Garden snapdragon) PE=2 SV=1	Uncharacterized protein GN=PRUPE_ppa006209mg OS=Prunus persica (Peach) PE=4 SV=1	PREDICTED: GTP-binding protein ERG-like [Malus domestica]	PREDICTED: Malus x domestica GTP-binding protein ERG-like (LOC103435310), mRNA
CS2_vs_CS1	gene.MD05G1247200	0	-2.52234	down	--	--	Molecular Function: zinc ion transmembrane transporter activity (GO:0005385);; Cellular Component: integral component of membrane (GO:0016021);; Molecular Function: 2-alkenal reductase [NAD(P)] activity (GO:0032440);; Biological Process: oxidation-reduction process (GO:0055114);; Biological Process: zinc II ion transmembrane transport (GO:0071577);;	K14709|1e-157|rcu:RCOM_0122460|zinc/iron transporter, putative (EC:1.3.1.74)	Zinc transporter 1 (Precursor) GN=ZIP1 OS=Arabidopsis thaliana (Mouse-ear cress) PE=2 SV=1	Uncharacterized protein GN=PRUPE_ppa007253mg OS=Prunus persica (Peach) PE=4 SV=1	PREDICTED: zinc transporter 1-like [Malus domestica]	PREDICTED: Malus x domestica zinc transporter 1-like (LOC103435313), mRNA
CS2_vs_CS1	gene.MD05G1249700	1.29608e-06	1.09668	up	[P]	Inorganic ion transport and metabolism	Molecular Function: potassium ion transmembrane transporter activity (GO:0015079);; Cellular Component: membrane (GO:0016020);; Biological Process: potassium ion transmembrane transport (GO:0071805);;	--	Potassium transporter 10 GN=F28K20.5 OS=Arabidopsis thaliana (Mouse-ear cress) PE=2 SV=2	Uncharacterized protein GN=PRUPE_ppa001626mg OS=Prunus persica (Peach) PE=4 SV=1	PREDICTED: potassium transporter 10-like [Malus domestica]	PREDICTED: Malus x domestica potassium transporter 10-like (LOC103435296), transcript variant X2, mRNA
CS2_vs_CS1	gene.MD05G1250300	2.54438e-05	-1.3346	down	[FGR]	--	Molecular Function: catalytic activity (GO:0003824);; Molecular Function: protein kinase C binding (GO:0005080);; Biological Process: metabolic process (GO:0008152);; Molecular Function: zinc ion binding (GO:0008270);; Cellular Component: chloroplast (GO:0009507);;	--	14 kDa zinc-binding protein GN=ZBP14 OS=Zea mays (Maize) PE=1 SV=1	Uncharacterized protein (Fragment) GN=PRUPE_ppa015962mg OS=Prunus persica (Peach) PE=4 SV=1	PREDICTED: LOW QUALITY PROTEIN: 14 kDa zinc-binding protein [Malus domestica]	PREDICTED: Malus x domestica 14 kDa zinc-binding protein (LOC103435287), mRNA
CS2_vs_CS1	gene.MD05G1253200	2.38986e-29	3.56562	up	--	--	--	--	Protein PHLOEM PROTEIN 2-LIKE A1 GN=PP2A1 OS=Arabidopsis thaliana (Mouse-ear cress) PE=2 SV=1	Uncharacterized protein GN=PRUPE_ppa014565mg OS=Prunus persica (Peach) PE=4 SV=1	PREDICTED: protein PHLOEM PROTEIN 2-LIKE A1-like [Malus domestica]	PREDICTED: Malus x domestica protein PHLOEM PROTEIN 2-LIKE A1-like (LOC103435269), mRNA
CS2_vs_CS1	gene.MD05G1254800	0.00188943	1.1257	up	[R]	General function prediction only	Molecular Function: monooxygenase activity (GO:0004497);; Molecular Function: iron ion binding (GO:0005506);; Molecular Function: zinc ion binding (GO:0008270);; Molecular Function: electron carrier activity (GO:0009055);; Molecular Function: oxidoreductase activity, acting on paired donors, with incorporation or reduction of molecular oxygen (GO:0016705);; Molecular Function: heme binding (GO:00…	K06874|0.0|pop:POPTR_759183|hypothetical protein	--	Uncharacterized protein GN=PRUPE_ppa004527mg OS=Prunus persica (Peach) PE=4 SV=1	PREDICTED: zinc finger protein ZPR1-like [Pyrus x bretschneideri]	PREDICTED: Pyrus x bretschneideri zinc finger protein ZPR1-like (LOC103948006), mRNA
CS2_vs_CS1	gene.MD05G1255000	4.12493e-89	-1.86996	down	[U]	Intracellular trafficking, secretion, and vesicular transport	Cellular Component: integral component of membrane (GO:0016021);; Biological Process: vesicle-mediated transport (GO:0016192);;	--	Vesicle-associated membrane protein 722 GN=F25I18.14 OS=Arabidopsis thaliana (Mouse-ear cress) PE=2 SV=2	Uncharacterized protein GN=PRUPE_ppa011167mg OS=Prunus persica (Peach) PE=4 SV=1	PREDICTED: vesicle-associated membrane protein 721-like [Malus domestica]	PREDICTED: Malus x domestica vesicle-associated membrane protein 722-like (LOC103435238), mRNA
CS2_vs_CS1	gene.MD05G1261900	2.72225e-25	1.1335	up	--	--	--	--	--	Uncharacterized protein GN=PRUPE_ppa004663mg OS=Prunus persica (Peach) PE=4 SV=1	PREDICTED: protein prune homolog isoform X1 [Malus domestica]	PREDICTED: Malus x domestica protein prune homolog (LOC103423490), transcript variant X1, mRNA
CS2_vs_CS1	gene.MD05G1262600	2.60658e-32	3.05743	up	[Q]	Secondary metabolites biosynthesis, transport and catabolism	--	--	Cytochrome P450 716B2 GN=CYP716B2 OS=Picea sitchensis (Sitka spruce) PE=2 SV=1	Uncharacterized protein GN=PRUPE_ppa004999mg OS=Prunus persica (Peach) PE=4 SV=1	PREDICTED: beta-amyrin 28-oxidase-like [Malus domestica]	PREDICTED: Malus x domestica beta-amyrin 28-oxidase-like (LOC103450666), mRNA
CS2_vs_CS1	gene.MD05G1262700	2.67644e-18	1.4925	up	[Q]	Secondary metabolites biosynthesis, transport and catabolism	--	--	Cytochrome P450 716B2 GN=CYP716B2 OS=Picea sitchensis (Sitka spruce) PE=2 SV=1	Uncharacterized protein GN=PRUPE_ppa004999mg OS=Prunus persica (Peach) PE=4 SV=1	PREDICTED: beta-amyrin 28-oxidase-like [Malus domestica]	PREDICTED: Malus x domestica beta-amyrin 28-oxidase-like (LOC103413895), mRNA
CS2_vs_CS1	gene.MD05G1264300	9.97832e-12	-1.12766	down	--	--	--	--	Receptor-like protein 12 (Precursor) GN=RLP12 OS=Arabidopsis thaliana (Mouse-ear cress) PE=2 SV=2	Uncharacterized protein GN=PRUPE_ppa017609mg OS=Prunus persica (Peach) PE=4 SV=1	PREDICTED: probable leucine-rich repeat receptor-like protein kinase At1g35710 [Malus domestica]	PREDICTED: Malus x domestica uncharacterized LOC103454465 (LOC103454465), mRNA
CS2_vs_CS1	gene.MD05G1267500	3.96826e-21	-2.07262	down	[C]	Energy production and conversion	Molecular Function: UDP-N-acetylmuramate dehydrogenase activity (GO:0008762);; Molecular Function: reticuline oxidase activity (GO:0050468);; Molecular Function: flavin adenine dinucleotide binding (GO:0050660);; Biological Process: oxidation-reduction process (GO:0055114);;	--	Reticuline oxidase-like protein (Precursor) GN=At4g20830 OS=Arabidopsis thaliana (Mouse-ear cress) PE=1 SV=2	Uncharacterized protein GN=PRUPE_ppa004317mg OS=Prunus persica (Peach) PE=4 SV=1	PREDICTED: reticuline oxidase-like protein isoform X1 [Pyrus x bretschneideri]	PREDICTED: Pyrus x bretschneideri reticuline oxidase-like protein (LOC103952340), transcript variant X1, mRNA
CS2_vs_CS1	gene.MD05G1267600	5.64032e-17	1.16933	up	[C]	Energy production and conversion	Cellular Component: mitochondrion (GO:0005739);; Cellular Component: vacuole (GO:0005773);; Cellular Component: plasma membrane (GO:0005886);; Biological Process: response to oxidative stress (GO:0006979);; Molecular Function: UDP-N-acetylmuramate dehydrogenase activity (GO:0008762);; Cellular Component: plant-type cell wall (GO:0009505);; Cellular Component: apoplast (GO:0048046);; Molecular Fun…	--	Reticuline oxidase-like protein (Precursor) GN=At4g20830 OS=Arabidopsis thaliana (Mouse-ear cress) PE=1 SV=2	Uncharacterized protein GN=PRUPE_ppa026518mg OS=Prunus persica (Peach) PE=4 SV=1	PREDICTED: reticuline oxidase-like protein [Pyrus x bretschneideri]	PREDICTED: Pyrus x bretschneideri reticuline oxidase-like protein (LOC103952341), mRNA
CS2_vs_CS1	gene.MD05G1274200	1.04412e-48	1.02819	up	[R]	General function prediction only	--	--	Cleavage and polyadenylation specificity factor CPSF30 GN=CPSF30 OS=Arabidopsis thaliana (Mouse-ear cress) PE=1 SV=1	Uncharacterized protein GN=PRUPE_ppa019072mg OS=Prunus persica (Peach) PE=4 SV=1	PREDICTED: cleavage and polyadenylation specificity factor CPSF30-like [Pyrus x bretschneideri]	PREDICTED: Pyrus x bretschneideri cleavage and polyadenylation specificity factor CPSF30-like (LOC103952383), mRNA
CS2_vs_CS1	gene.MD05G1274700	2.46808e-41	-2.07333	down	[E]	Amino acid transport and metabolism	Biological Process: amino acid transmembrane transport (GO:0003333);; Molecular Function: L-glutamate transmembrane transporter activity (GO:0005313);; Cellular Component: plasma membrane (GO:0005886);; Molecular Function: arginine transmembrane transporter activity (GO:0015181);; Molecular Function: L-lysine transmembrane transporter activity (GO:0015189);; Biological Process: lysine transport (…	--	Cationic amino acid transporter 1 GN=F7J7.60 OS=Arabidopsis thaliana (Mouse-ear cress) PE=1 SV=1	Uncharacterized protein GN=PRUPE_ppa003107mg OS=Prunus persica (Peach) PE=4 SV=1	PREDICTED: cationic amino acid transporter 1-like [Malus domestica]	PREDICTED: Malus x domestica cationic amino acid transporter 1-like (LOC103435610), transcript variant X2, mRNA
CS2_vs_CS1	gene.MD05G1278500	7.92249e-07	1.64278	up	[S]	Function unknown	Cellular Component: vacuolar membrane (GO:0005774);; Cellular Component: plasma membrane (GO:0005886);; Cellular Component: plasmodesma (GO:0009506);; Cellular Component: chloroplast envelope (GO:0009941);;	--	--	Uncharacterized protein GN=PRUPE_ppa002050mg OS=Prunus persica (Peach) PE=4 SV=1	PREDICTED: CSC1-like protein ERD4 [Malus domestica]	PREDICTED: Malus x domestica CSC1-like protein ERD4 (LOC103435180), mRNA
CS2_vs_CS1	gene.MD05G1280400	1.91482e-23	-1.63883	down	[RTKL]	--	Biological Process: cytokinesis by cell plate formation (GO:0000911);; Molecular Function: protein serine/threonine kinase activity (GO:0004674);; Molecular Function: ATP binding (GO:0005524);; Cellular Component: nucleus (GO:0005634);; Cellular Component: cytosol (GO:0005829);; Biological Process: protein phosphorylation (GO:0006468);; Biological Process: response to nutrient (GO:0007584);; Cell…	--	CBL-interacting serine/threonine-protein kinase 23 GN=At1g30270 OS=Arabidopsis thaliana (Mouse-ear cress) PE=1 SV=1	Uncharacterized protein GN=PRUPE_ppa005492mg OS=Prunus persica (Peach) PE=4 SV=1	PREDICTED: CBL-interacting protein kinase 23-like [Malus domestica]	PREDICTED: Malus x domestica CBL-interacting protein kinase 23-like (LOC103435169), mRNA
CS2_vs_CS1	gene.MD05G1280500	9.00104e-07	-1.16416	down	[LKJ]	--	Molecular Function: nucleic acid binding (GO:0003676);; Molecular Function: ATP binding (GO:0005524);; Molecular Function: ATP-dependent helicase activity (GO:0008026);;	--	DEAD-box ATP-dependent RNA helicase 1 GN=RH1 OS=Arabidopsis thaliana (Mouse-ear cress) PE=2 SV=3	Uncharacterized protein GN=PRUPE_ppa004455mg OS=Prunus persica (Peach) PE=4 SV=1	PREDICTED: DEAD-box ATP-dependent RNA helicase 1 [Malus domestica]	PREDICTED: Malus x domestica DEAD-box ATP-dependent RNA helicase 1 (LOC103435160), mRNA
CS2_vs_CS1	gene.MD05G1281100	8.40406e-181	1.69137	up	--	--	--	--	Transcription factor TCP2 GN=TCP2 OS=Arabidopsis thaliana (Mouse-ear cress) PE=2 SV=1	MdTCP2B protein GN=MdTCP2B OS=Malus domestica (Apple) PE=2 SV=1	uncharacterized protein LOC103435166 [Malus domestica]	Malus domestica transcription factor TCP2-like (LOC103435166), mRNA>gi|295841586|dbj|AB531020.1| Malus x domestica MdTCP2B mRNA, complete cds
[truncated: 27,194 more rows]

## Sheet: Additional file 2
Additional file 2. Detailed information regarding the up- and down-regulated metabolites in the following comparison groups: CS5, 4, 3, and 2 vs CS1; CS5, 4, and 3 vs CS2; CS5 and 4 vs CS3; and CS5 vs CS4
Comparison groups	Peak	rt	Mass	MeanCS1	MeanCS0	VIP	P-VALUE	Q-VALUE	FOLD CHANGE	LOG_FOLDCHANGE
[truncated: 1,078 more rows]

## Sheet: Additional file 3
Additional file 3. Detailed information regarding the differentially expressed transcription factor genes in apple fruit during long-term cold storage
[truncated: 284 more rows]
